# Supplementary material for: Synthesis of hupehenols A, B, and E from protopanaxadiol
Source: Royal Society of Chemistry journal article supplement (doi:10.1039/c6ra04236h), 2016-01-01
Supplement: c6ra04236h1.pdf [file c6ra04236h1.pdf]

Supporting Information

## Synthesis of Hupehenols A, B, and E from Protopanaxadiol

Li-Dong Shao,<sup>a</sup> Jun Xu,<sup>a,b</sup> Xiao-Nian Li,<sup>a</sup> Zhi-Jun Zhang,<sup>a,b</sup> Xin Shi,<sup>a,b</sup> Jian Ren,<sup>a,b</sup> Juan He,<sup>a</sup> Yu Zhao,<sup>a</sup> Ying

Leng,<sup>c</sup> Chengfeng Xia,<sup>\*a</sup> and Qin-Shi Zhao<sup>\*a</sup>

<sup>a</sup> State Key Laboratory of Phytochemistry and Plant Resources in West China, Kunming Institute of Botany, Chinese Academy of Sciences, Kunming 650201, China

<sup>b</sup> University of Chinese Academy of Sciences, Beijing 100049, China

<sup>c</sup> Shanghai Institute of Materia Medica, Chinese Academy of Sciences, Shanghai 201203, China

Corresponding Author: Qin-Shi Zhao ([qinshizhao@mail.kib.ac.cn](mailto:qinshizhao@mail.kib.ac.cn)), Chengfeng Xia ([xiachengfeng@mail.kib.ac.cn](mailto:xiachengfeng@mail.kib.ac.cn))

Supporting Information

105 pages

| Contents:                                                                       | page   |
|---------------------------------------------------------------------------------|--------|
| <b>Table S1.</b> Attempts to prepare $\Delta^{(17,20)}$ Olefin.....             | s2     |
| <b>Table S2.</b> Attempts to achieve allylic oxidation of olefin <b>8</b> ..... | s3     |
| <b>Table S3.</b> 11 $\beta$ -HSD1 Inhibition of Synthetic Compounds.....        | s4     |
| 1D and 2D spectra of compound <b>12</b> .....                                   | s5-7   |
| 1D and 2D spectra of newly synthesized compounds.....                           | s8-102 |
| X-ray crystallographic data for compounds <b>17</b> .....                       | s103   |
| X-ray crystallographic data for compounds <b>26a</b> .....                      | s104   |
| X-ray crystallographic data for compounds <b>4</b> .....                        | s105   |

**Table S1.** Attempts to Prepare  $\Delta^{(17,20)}$  Olefin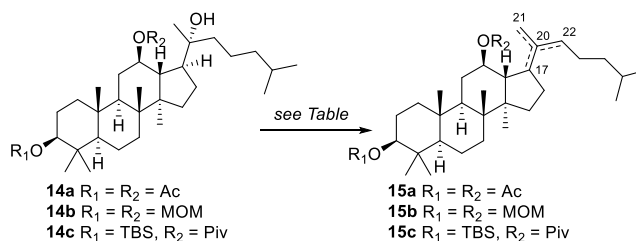

| entry     | substrate  | conditions                                            | yield% ( $\Delta^{17(20)}:\Delta^{20(22)}:\Delta^{20(21)}$ ) <sup>a</sup> |
|-----------|------------|-------------------------------------------------------|---------------------------------------------------------------------------|
| <b>1</b>  | <b>14a</b> | <i>p</i> TSA(cat.), toluene, reflux, 3 h              | 70 (0:2.5:1)                                                              |
| <b>2</b>  | <b>14a</b> | SOCl <sub>2</sub> , pyr., 0 °C-rt, 0.5 h              | 70 (0:2.5:1)                                                              |
| <b>3</b>  | <b>14a</b> | POCl <sub>3</sub> , pyr., 40 °C, 6 h                  | <b>85 (0:4.7:1)</b>                                                       |
| <b>4</b>  | <b>14a</b> | MsCl, DBU, benzene, 0-80 °C, 12 h                     | NR                                                                        |
| <b>5</b>  | <b>14a</b> | MsCl, TEA, DCM, 0 °C-rt, 3 h                          | 70 (0:3:1)                                                                |
| <b>6</b>  | <b>14a</b> | Burgess' reagent, toluene, reflux, 2 h                | 80 (0:1.5:1)                                                              |
| <b>7</b>  | <b>14a</b> | BF <sub>3</sub> · Et <sub>2</sub> O, DCM, 0 °C, 0.5 h | 65 (0:3.5:1)                                                              |
| <b>8</b>  | <b>14a</b> | DEAD, PPh <sub>3</sub> , THF, 0-50 °C, 4 h            | 77 (0:3:1)                                                                |
| <b>9</b>  | <b>14b</b> | POCl <sub>3</sub> , pyr., 40 °C, 8 h                  | <b>80 (0:3:1)</b>                                                         |
| <b>10</b> | <b>14c</b> | POCl <sub>3</sub> , pyr., 40 °C, 12 h                 | <b>82 (0:4:1)</b>                                                         |

<sup>a</sup>The ratios were determined by the isolated yields of compounds **16** and **10** after ozonolysis of olefins.

**Table S2.** Attempts to Achieve Allylic Oxidation of Olefin **8**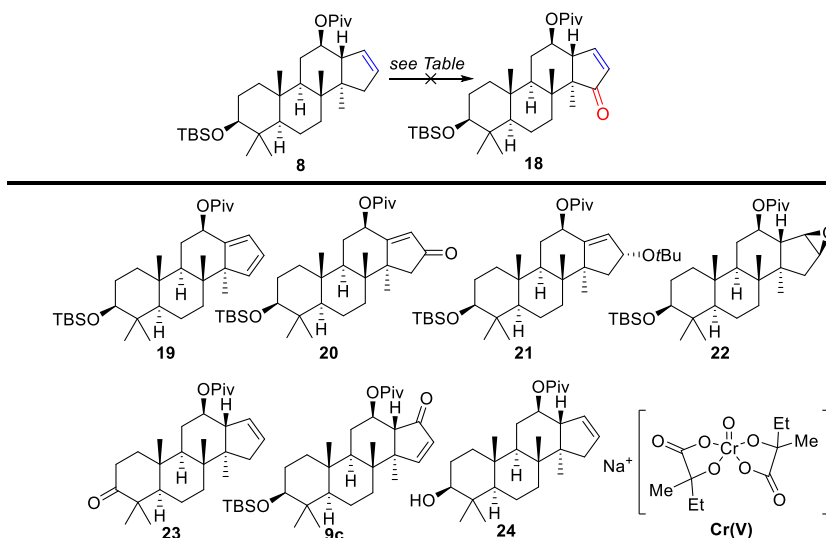

| entry                 | conditions                                                          | products (yield%) <sup>a</sup>                 |
|-----------------------|---------------------------------------------------------------------|------------------------------------------------|
| <b>1</b>              | SeO <sub>2</sub> , 1,4-dioxane, rt, 24 h                            | no reaction                                    |
| <b>2</b>              | SeO <sub>2</sub> , 1,4-dioxane/benzene (1:1), rt, 24 h              | no reaction                                    |
| <b>3</b>              | SeO <sub>2</sub> , 1,4-dioxane/benzene (1:1), 80 °C, 2 h            | <b>19</b> (90)                                 |
| <b>4<sup>b</sup></b>  | SeO <sub>2</sub> , TBHP, benzene, rt-60 °C, 72 h                    | <b>20</b> (30), <b>21</b> (35)                 |
| <b>5<sup>b</sup></b>  | CrO <sub>3</sub> , 3,5-dimethylpyrazole, DCM, -20 °C, 24 h          | no reaction                                    |
| <b>6<sup>b</sup></b>  | CrO <sub>3</sub> , 3,5-dimethylpyrazole, DCM, rt, 12 h              | <b>22</b> (42)                                 |
| <b>7</b>              | CrO <sub>3</sub> , TBHP (70% aq.), DCM, rt, 8 h                     | <b>23</b> (70)                                 |
| <b>8<sup>b</sup></b>  | CuCl, TBHP, benzene, 60 °C, 72 h                                    | <b>20</b> (23), <b>22</b> (12), <b>9c</b> (10) |
| <b>9<sup>b</sup></b>  | Mn(OAc) <sub>3</sub> , TBHP, ethyl acetate, 3 Å MS, rt, 5 d         | <b>20</b> (8), <b>22</b> (5), <b>9c</b> (<5)   |
| <b>10<sup>b</sup></b> | Pd/C, TBHP, K <sub>2</sub> CO <sub>3</sub> , DCM, rt, 48 h          | <b>20</b> (<5), <b>22</b> (<5)                 |
| <b>11<sup>b</sup></b> | PDC, TBHP (70% aq.), benzene, rt, 48 h                              | <b>20</b> (41), <b>22</b> (<5), <b>9c</b> (38) |
| <b>12<sup>b</sup></b> | Cr(V), MnO <sub>2</sub> , 15-crown-5, trifluorotoluene, 80 °C, 72 h | <b>20</b> (<5), <b>9c</b> (<5)                 |
| <b>13</b>             | DDQ, DMF, H <sub>2</sub> O (10 equiv.), 80 °C, 3 h                  | <b>24</b> (quant.)                             |

<sup>a</sup>Isolated yields.<sup>b</sup>Recovery of starting materials.

Table 1. 11 $\beta$ -HSD1 Inhibition of Synthetic Compounds

| entry                 | 1 $\mu$ M inhibitory ratio |                           | IC <sub>50</sub>          |                           |
|-----------------------|----------------------------|---------------------------|---------------------------|---------------------------|
|                       | human<br>11 $\beta$ -HSD1  | mouse<br>11 $\beta$ -HSD1 | human<br>11 $\beta$ -HSD1 | mouse<br>11 $\beta$ -HSD1 |
| <b>12</b>             | 16.13%                     | 12.35%                    | ND <sup>b</sup>           | ND                        |
| <b>14a</b>            | 13.24%                     | 7.55%                     | ND                        | ND                        |
| <b>14b</b>            | 7.90%                      | 7.75%                     | ND                        | ND                        |
| <b>16a</b>            | 81.12%                     | 10.77%                    | 0.1 $\mu$ M               | ND                        |
| <b>10a</b>            | 69.36%                     | 40.91%                    | 0.2 $\mu$ M               | ND                        |
| <b>10b</b>            | 15.43%                     | 11.48%                    | ND                        | ND                        |
| <b>11a</b>            | 12.21%                     | 12.53%                    | ND                        | ND                        |
| <b>17</b>             | 32.77%                     | 17.43%                    | ND                        | ND                        |
| <b>8</b>              | 0.96%                      | 8.74%                     | ND                        | ND                        |
| <b>19</b>             | 12.50%                     | 10.04%                    | ND                        | ND                        |
| <b><sup>a</sup></b>   | 28.86%                     | 10.84%                    | ND                        | ND                        |
| <b>20</b>             | 32.37%                     | 7.22%                     | ND                        | ND                        |
| <b>21</b>             | 28.29%                     | 35.17%                    | ND                        | ND                        |
| <b>22</b>             | 2.85%                      | 10.55%                    | ND                        | ND                        |
| <b>23</b>             | 2.61%                      | 7.91%                     | ND                        | ND                        |
| <b>24</b>             | 33.33%                     | 9.44%                     | ND                        | ND                        |
| <b>27</b>             | 35.64%                     | 7.98%                     | ND                        | ND                        |
| <b>30</b>             | 88.42%                     | 76.48%                    | 44.0 nM <sup>d</sup>      | 0.4 $\mu$ M               |
| <b>hupehenol B</b>    | 94.43%                     | 27.08%                    | 26.0 nM                   | 3.3 $\mu$ M               |
| <b>GA<sup>c</sup></b> | 96.20%                     | 94.91%                    | 7.4 nM                    | 12.1 nM                   |

<sup>a</sup> 3-OTBS-removed product of compound **19**.<sup>b</sup> ND: The IC<sub>50</sub> value was not determined if the inhibitory ratio was less than 50%.<sup>c</sup> Glycyrrhetic acid (GA) was used as a positive control.<sup>d</sup> P > 0.05 vs hupehenol B.



# Supporting Information

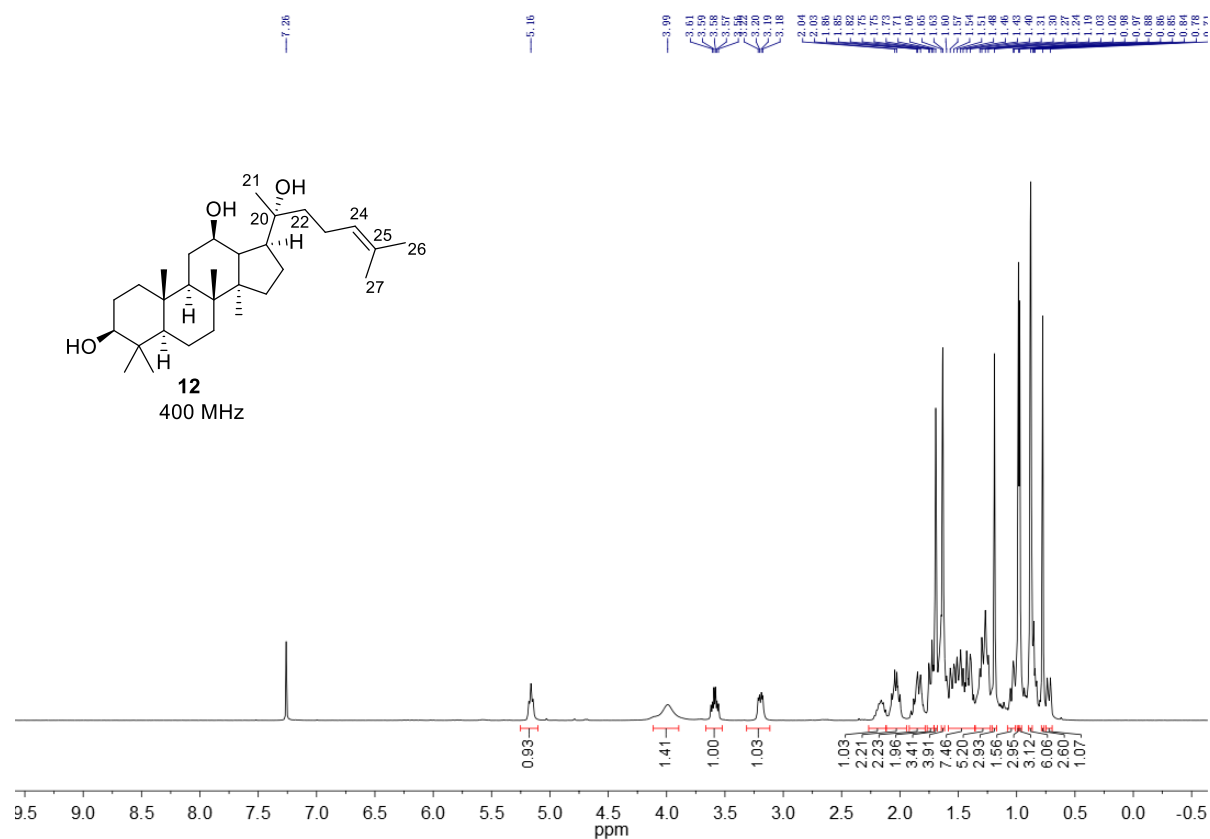

# Supporting Information

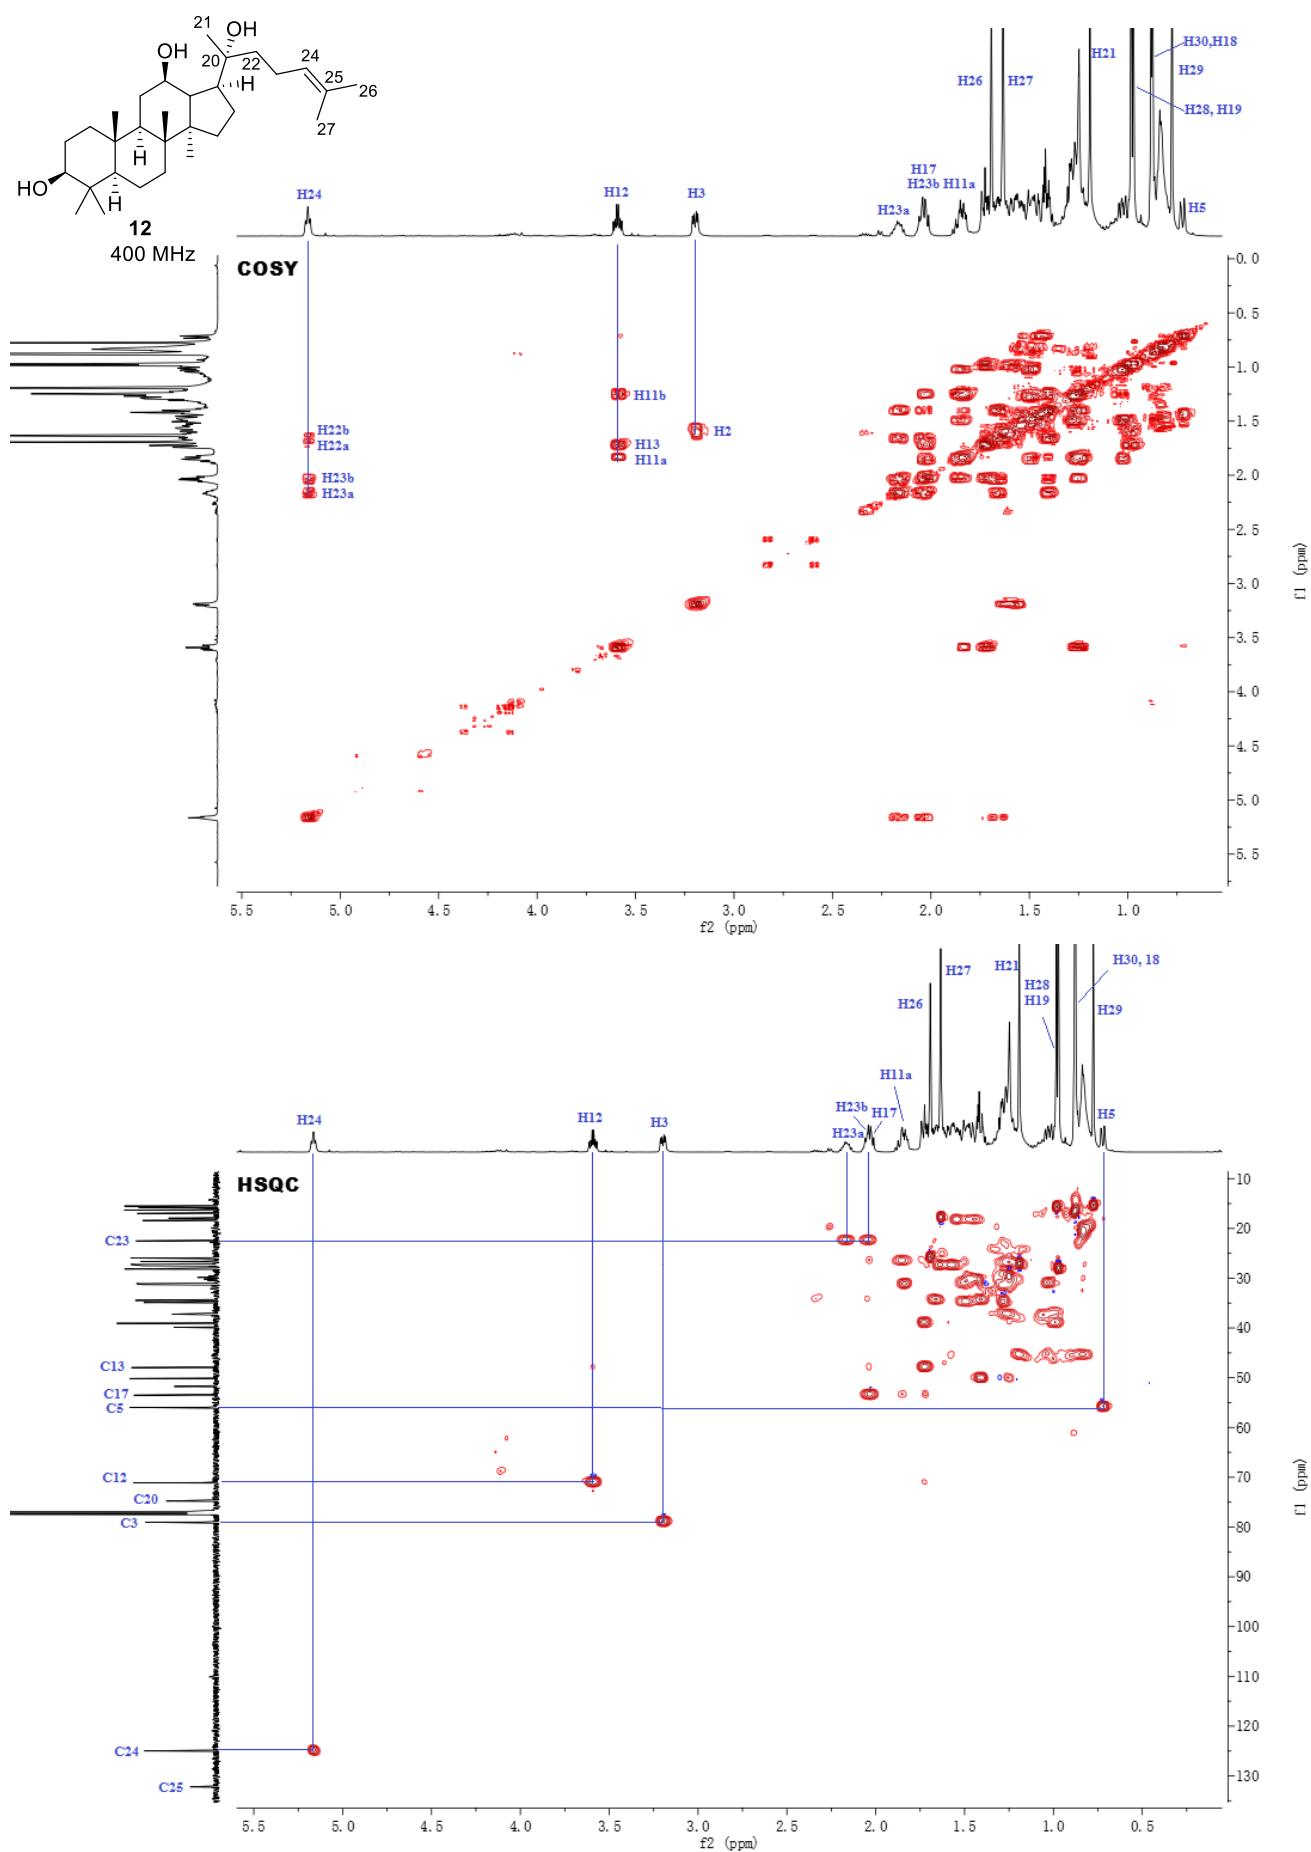

# Supporting Information

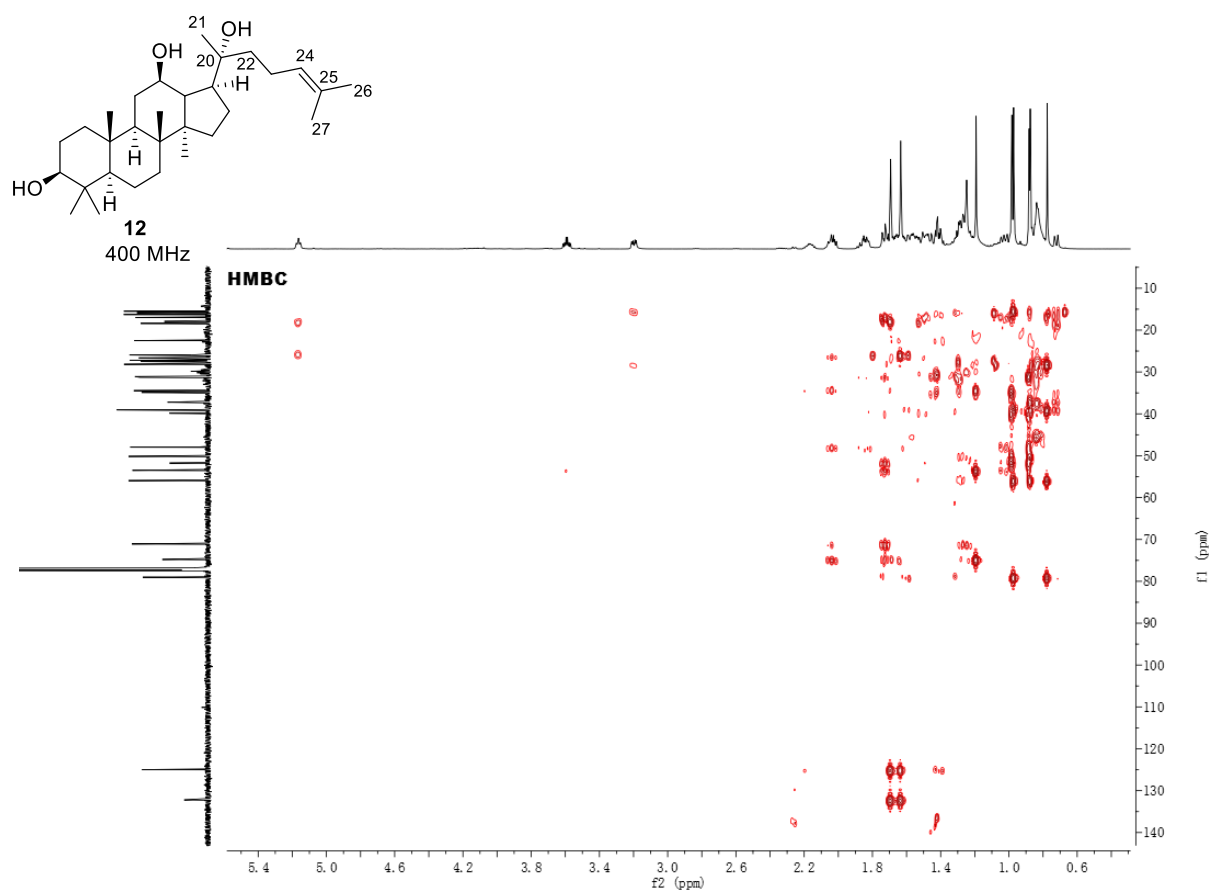

# Supporting Information

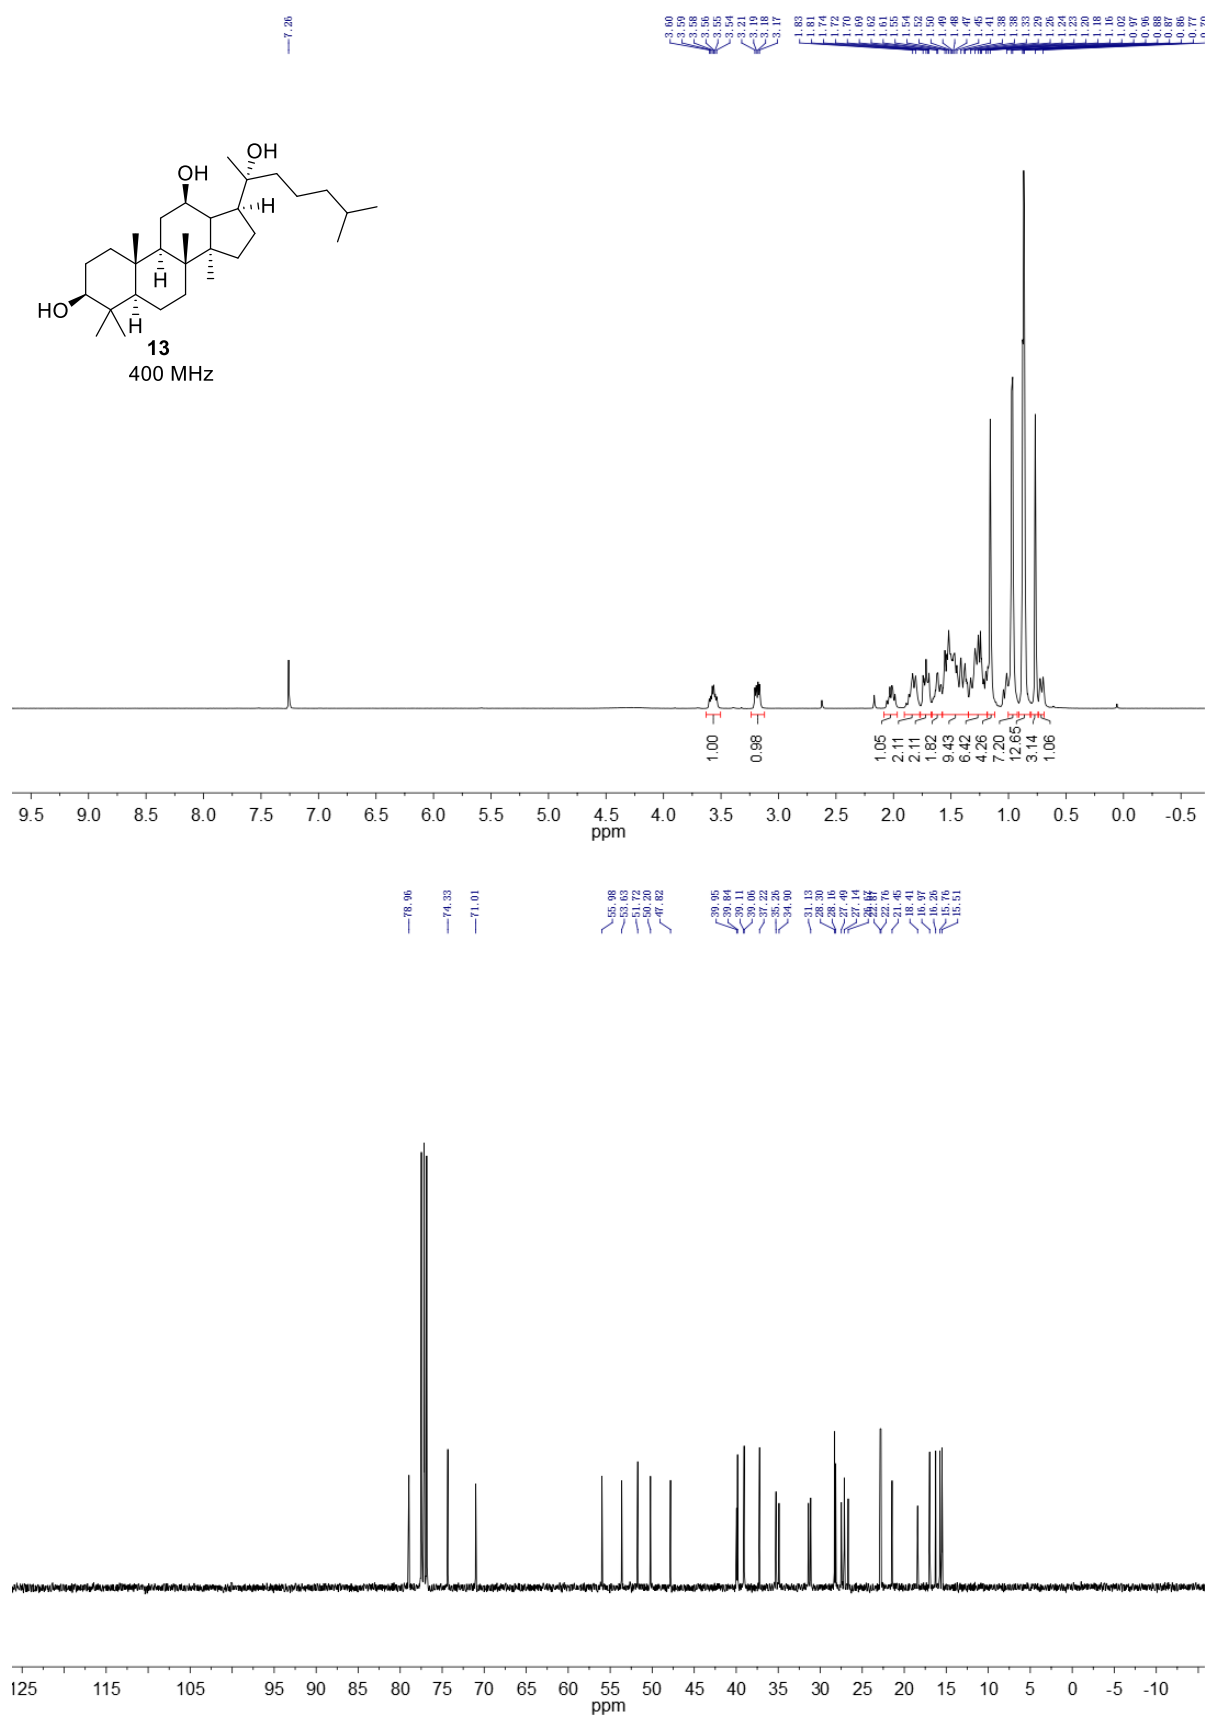

# Supporting Information

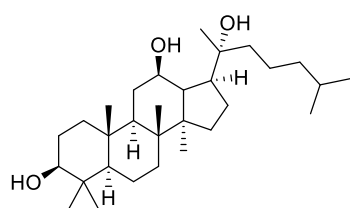

**13**  
400 MHz

**COSY**

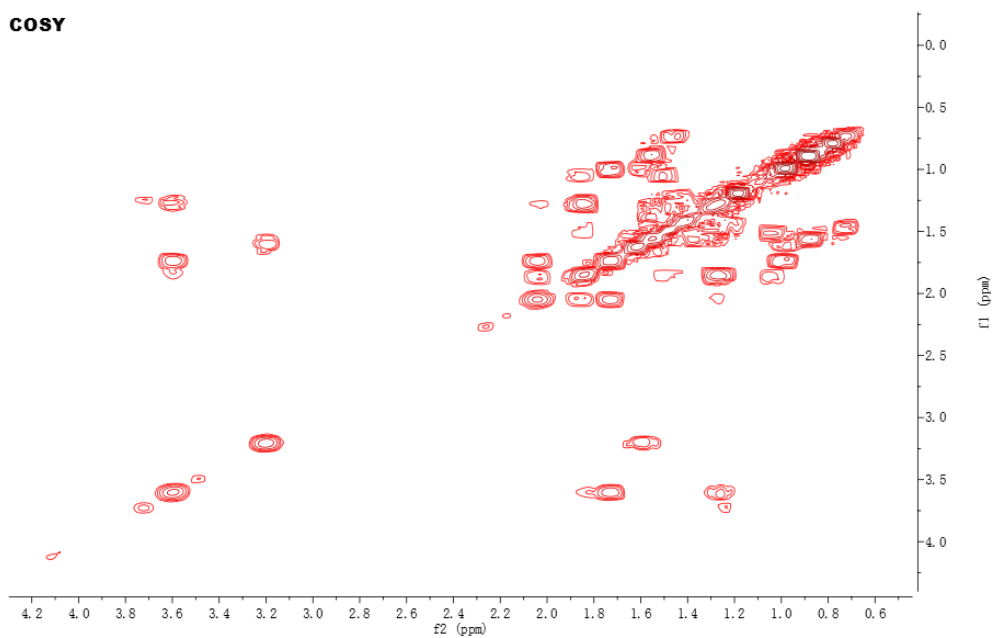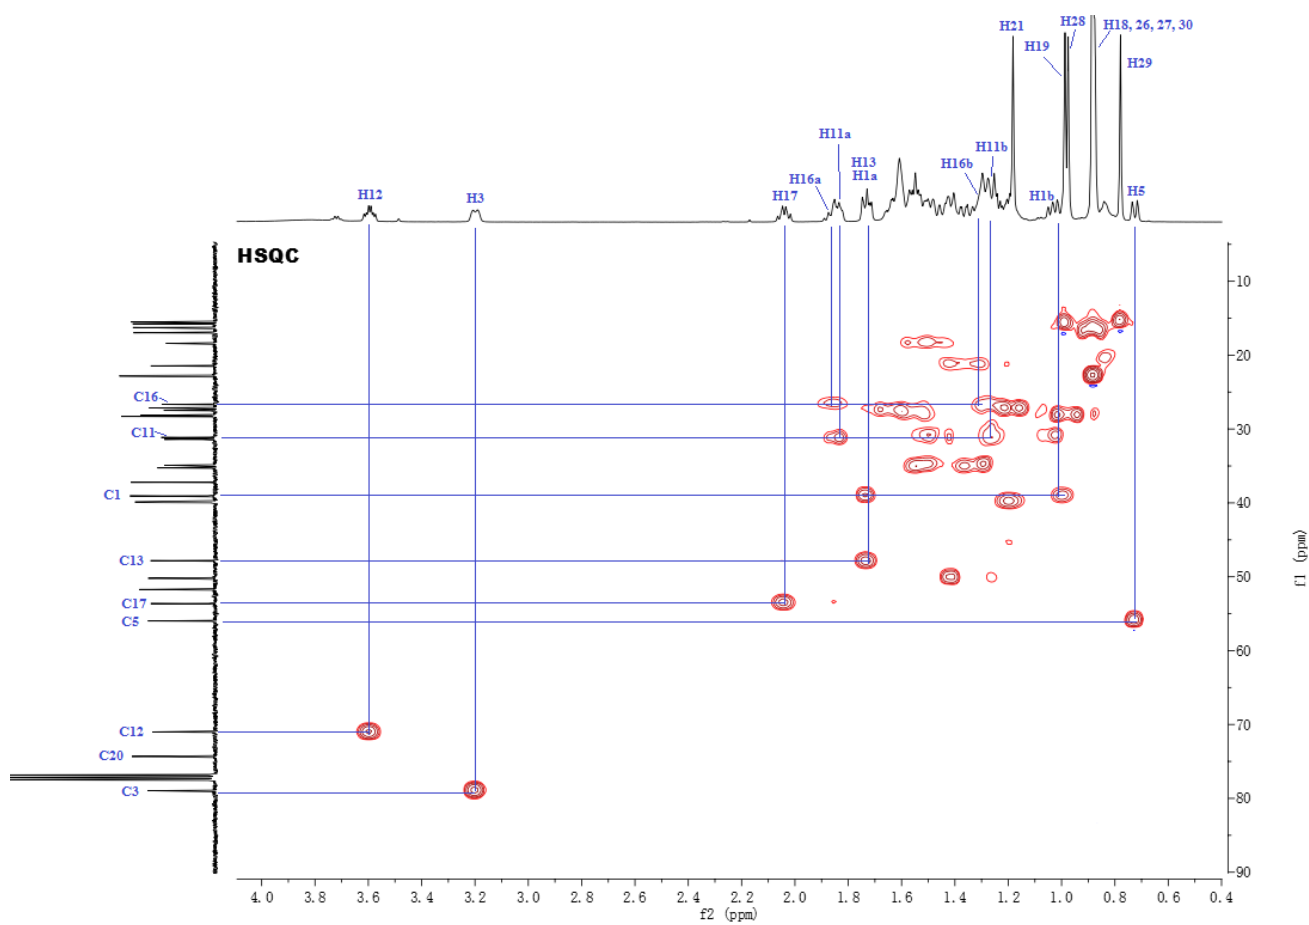

Supporting Information

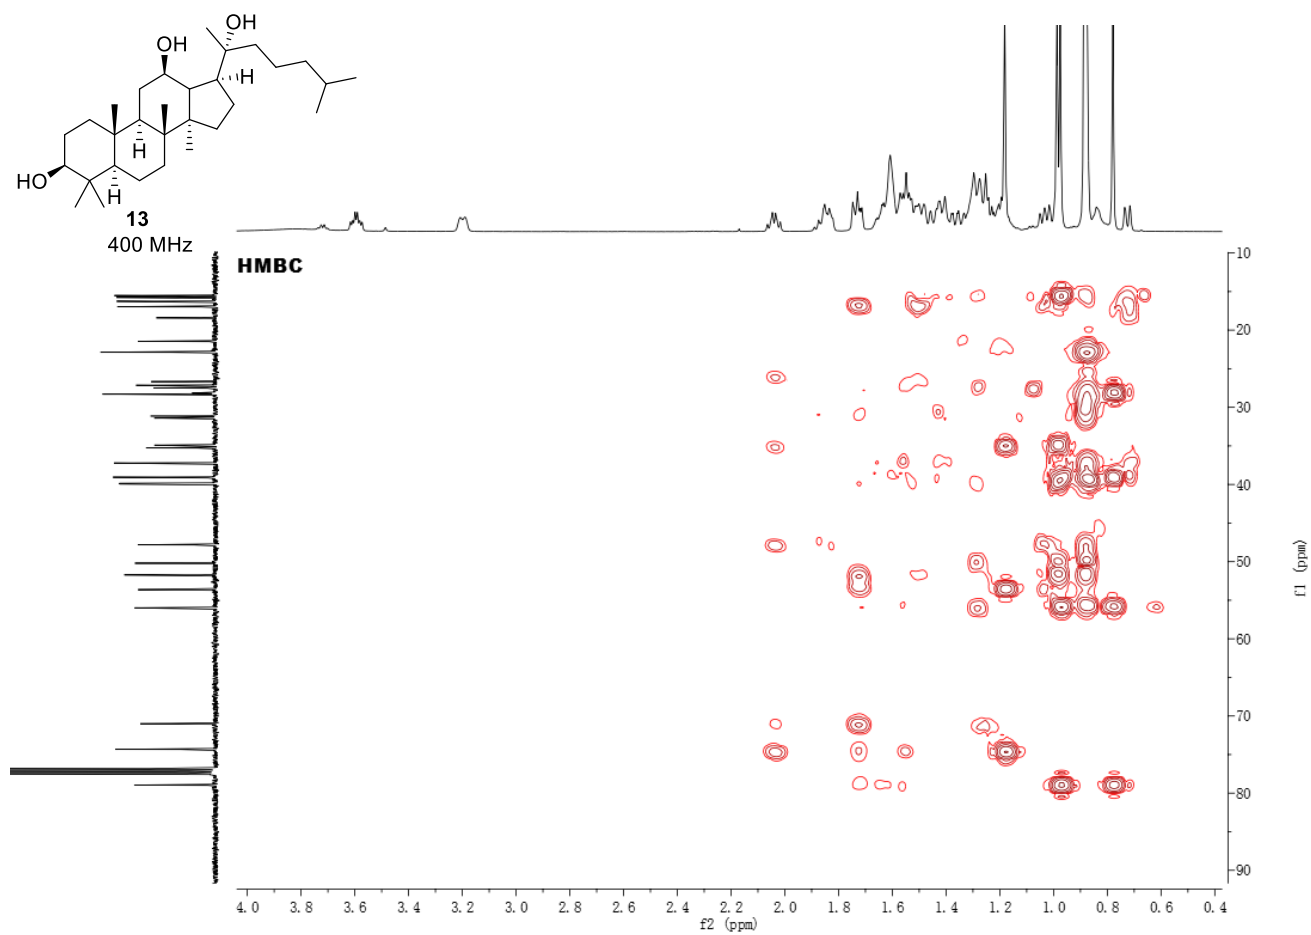

# Supporting Information

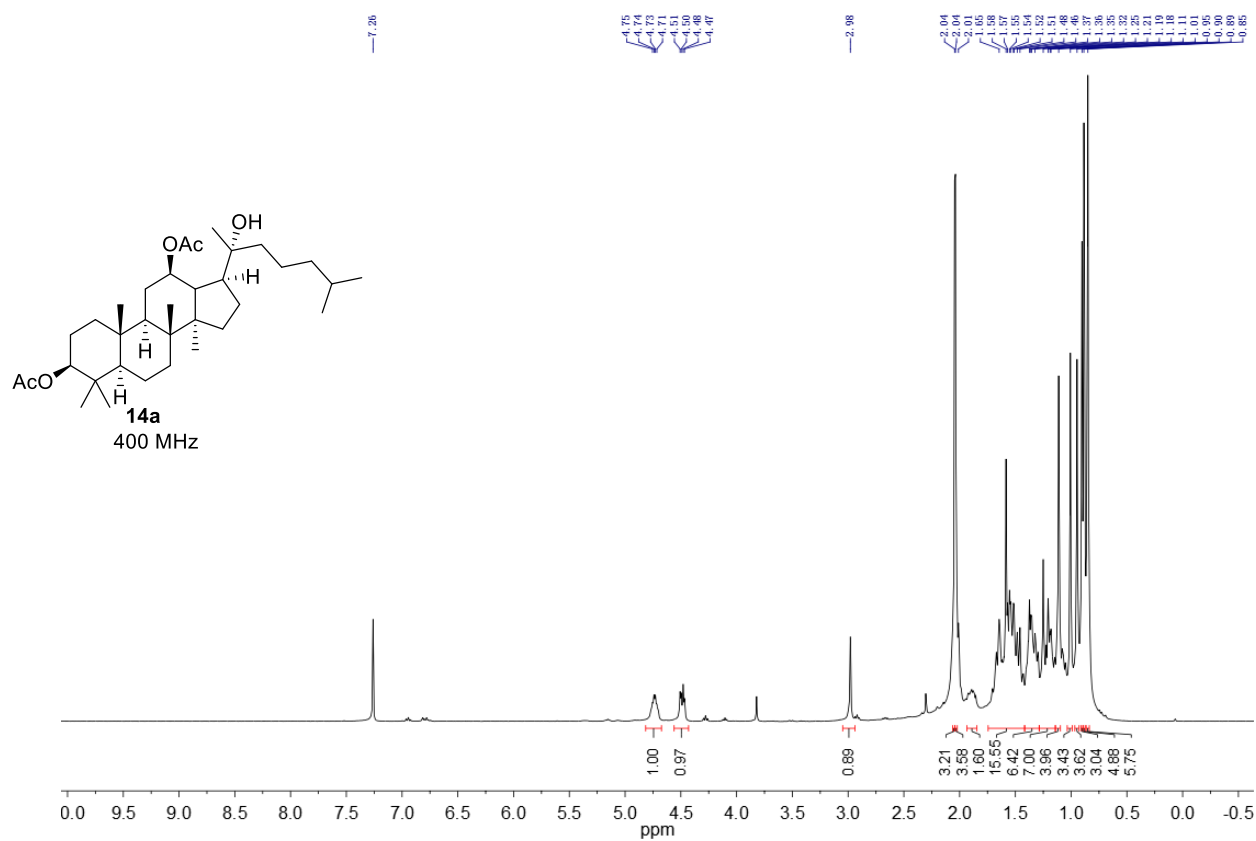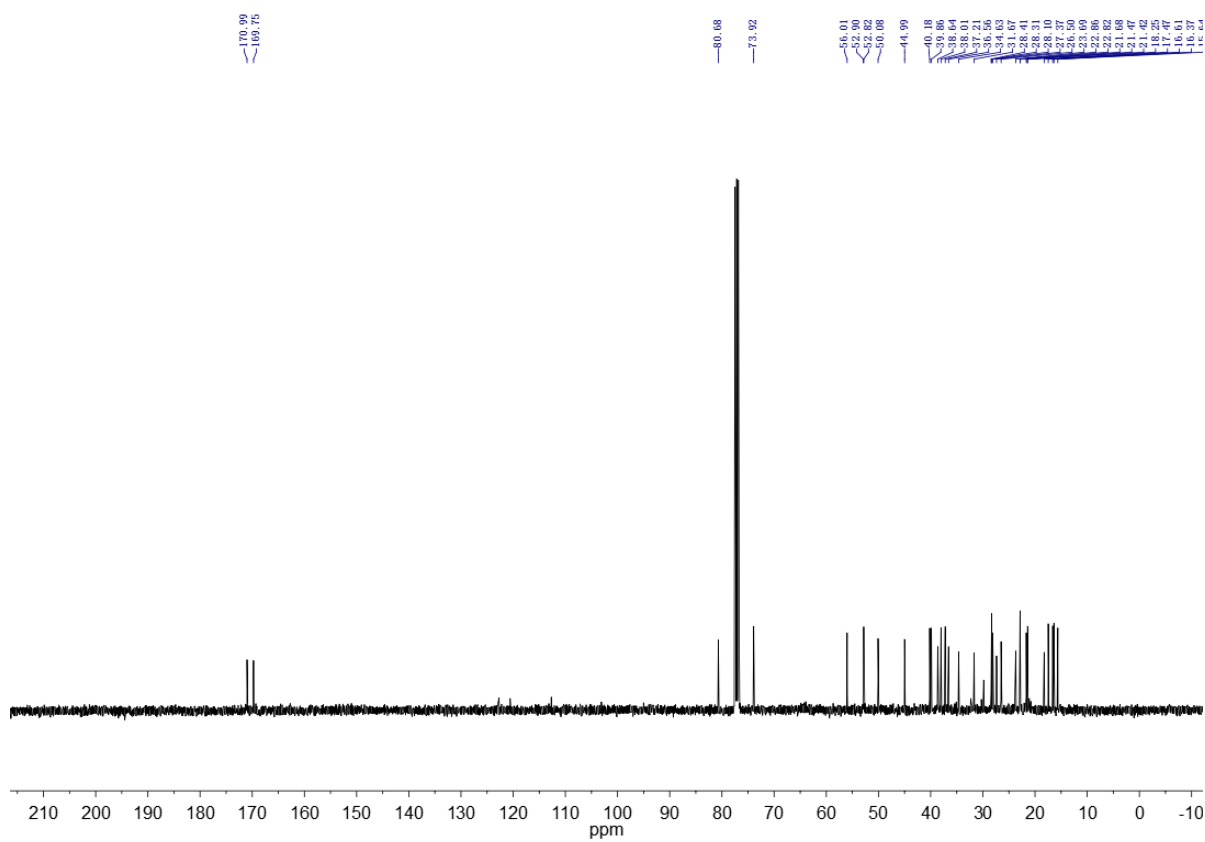

# Supporting Information

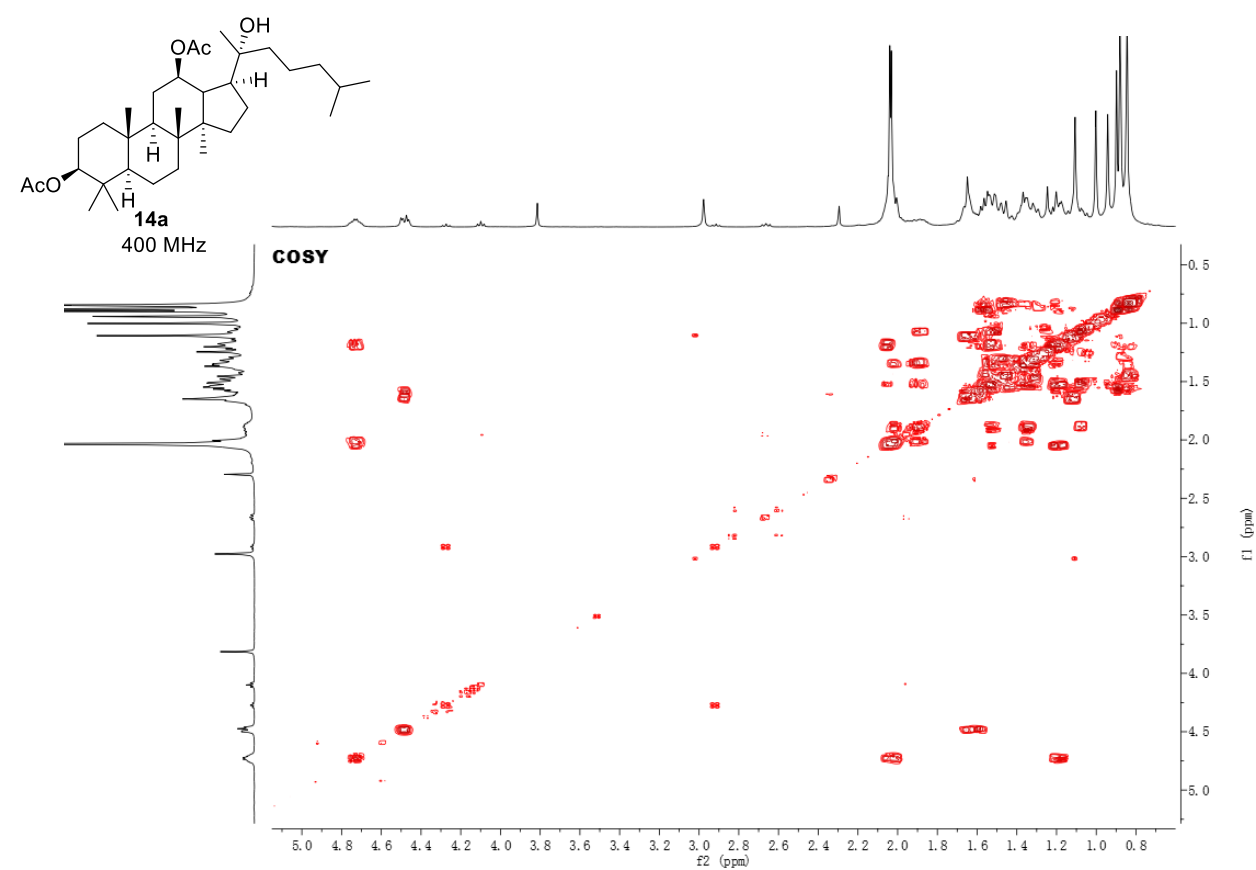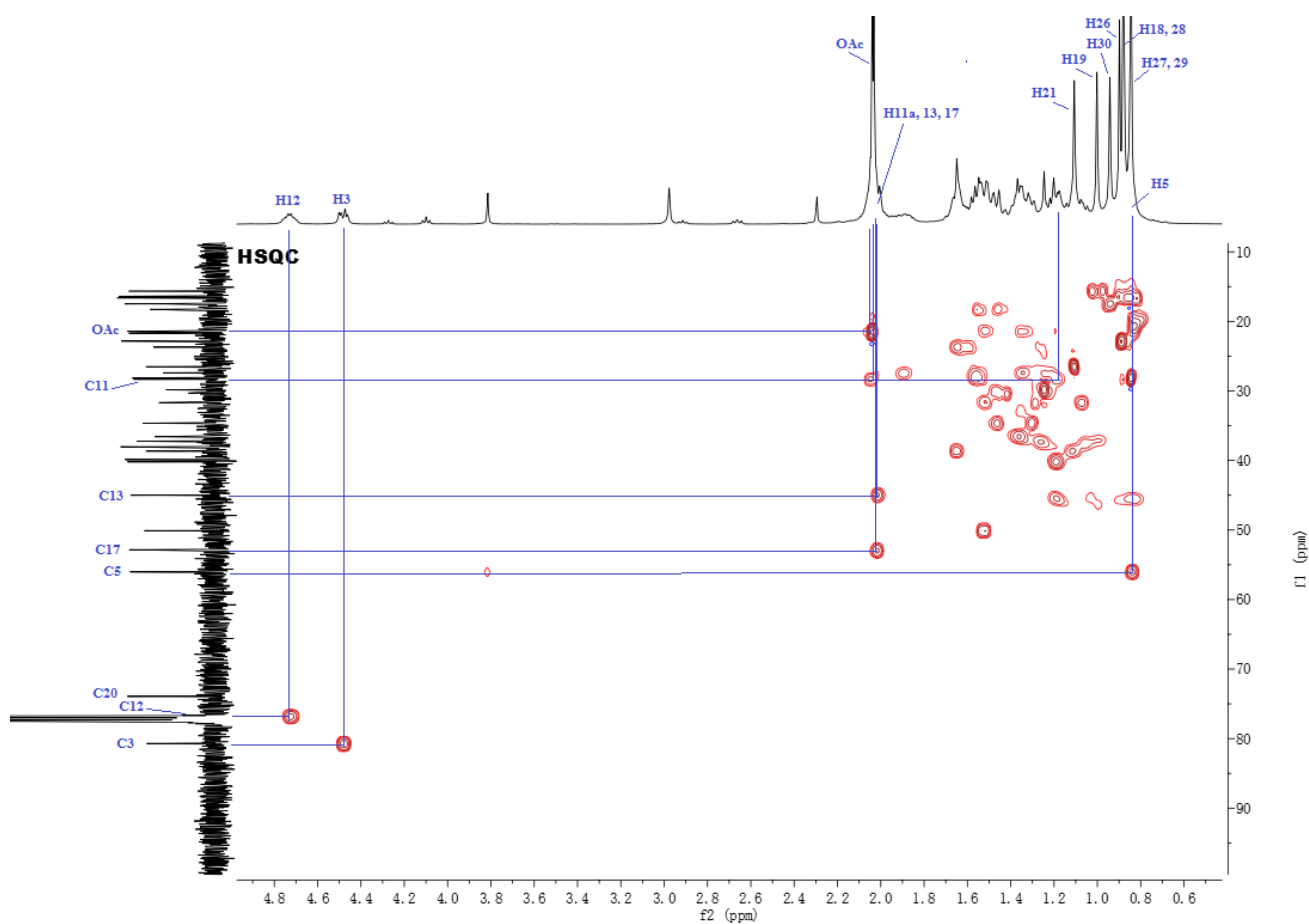



# Supporting Information

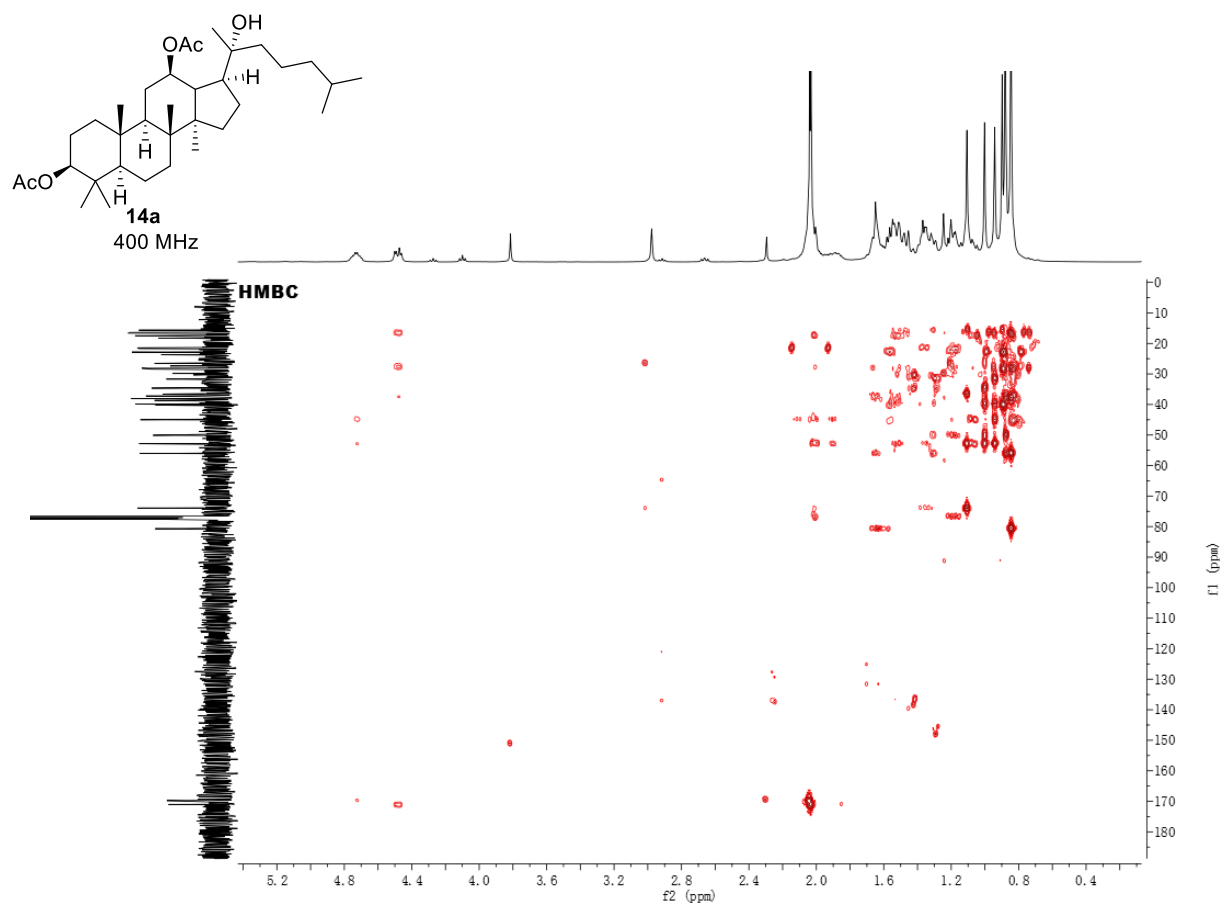

# Supporting Information

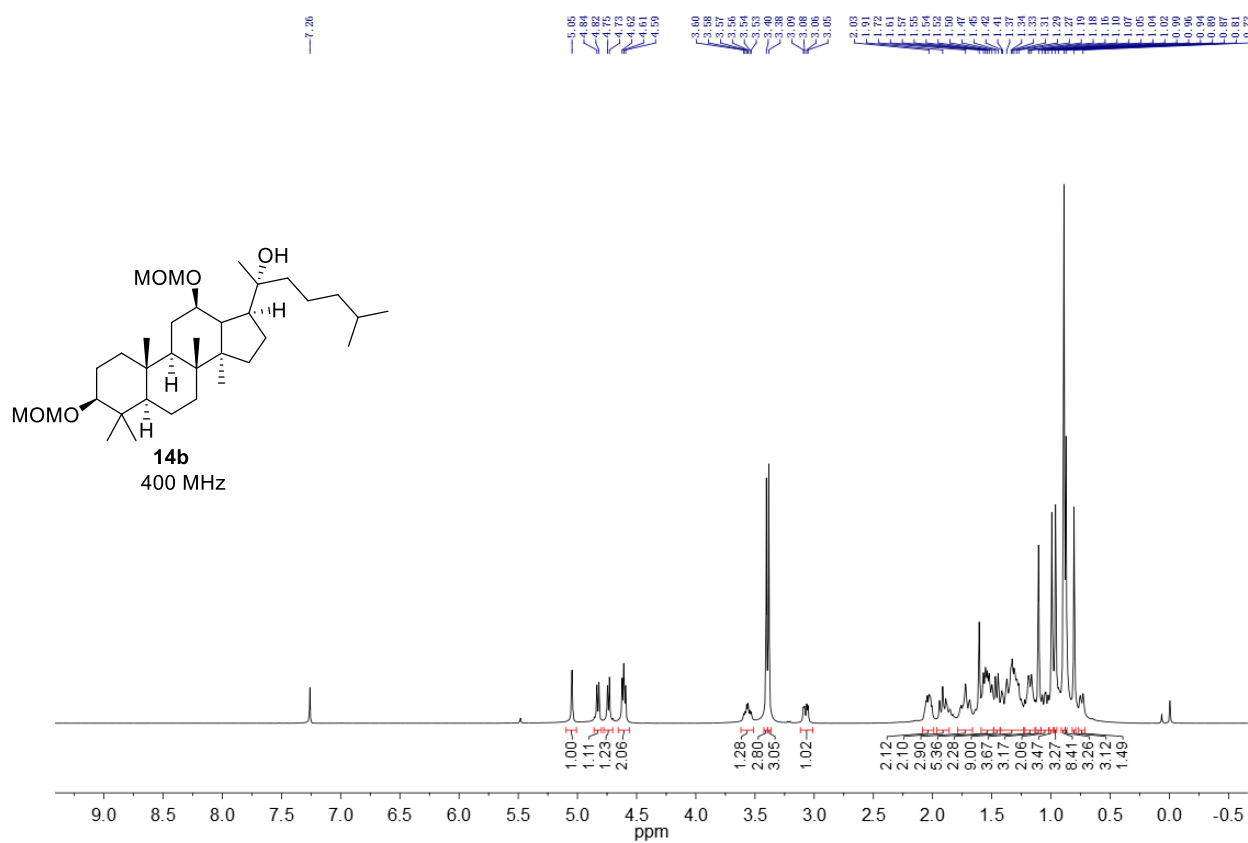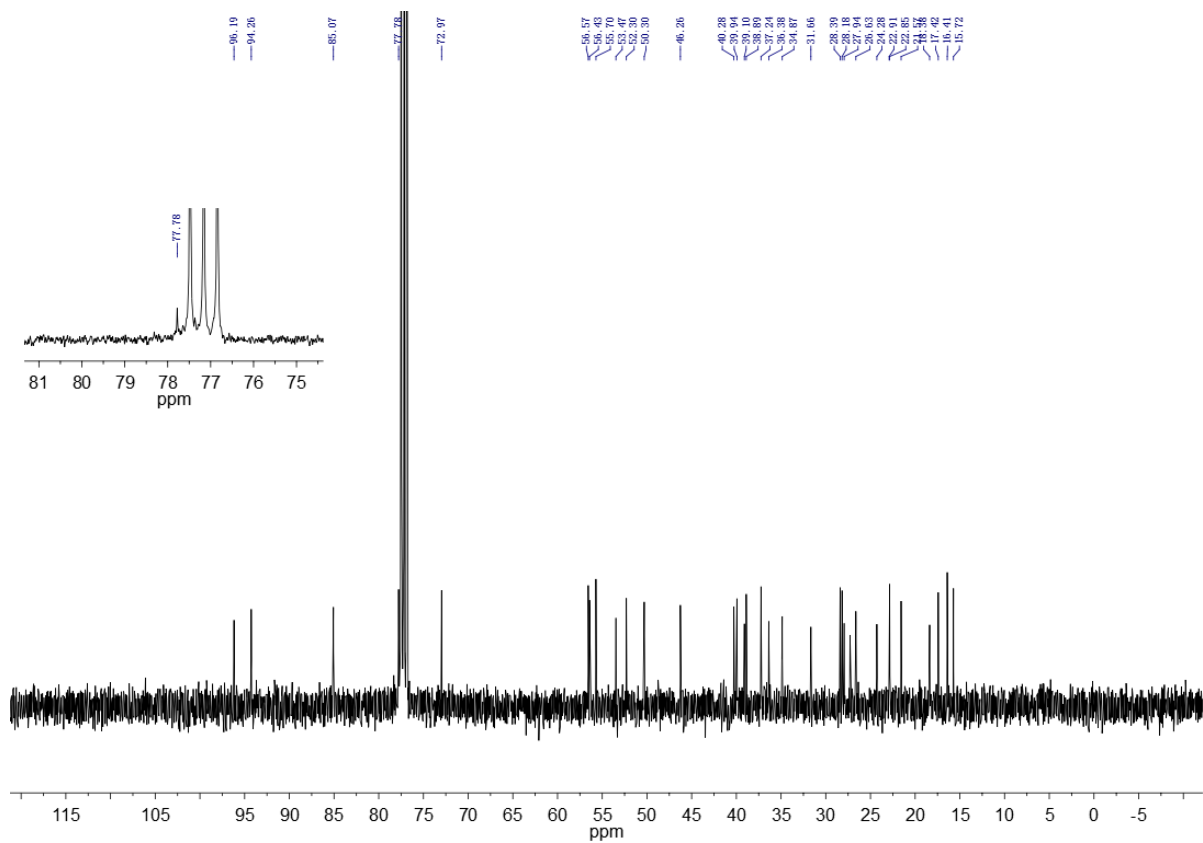

# Supporting Information

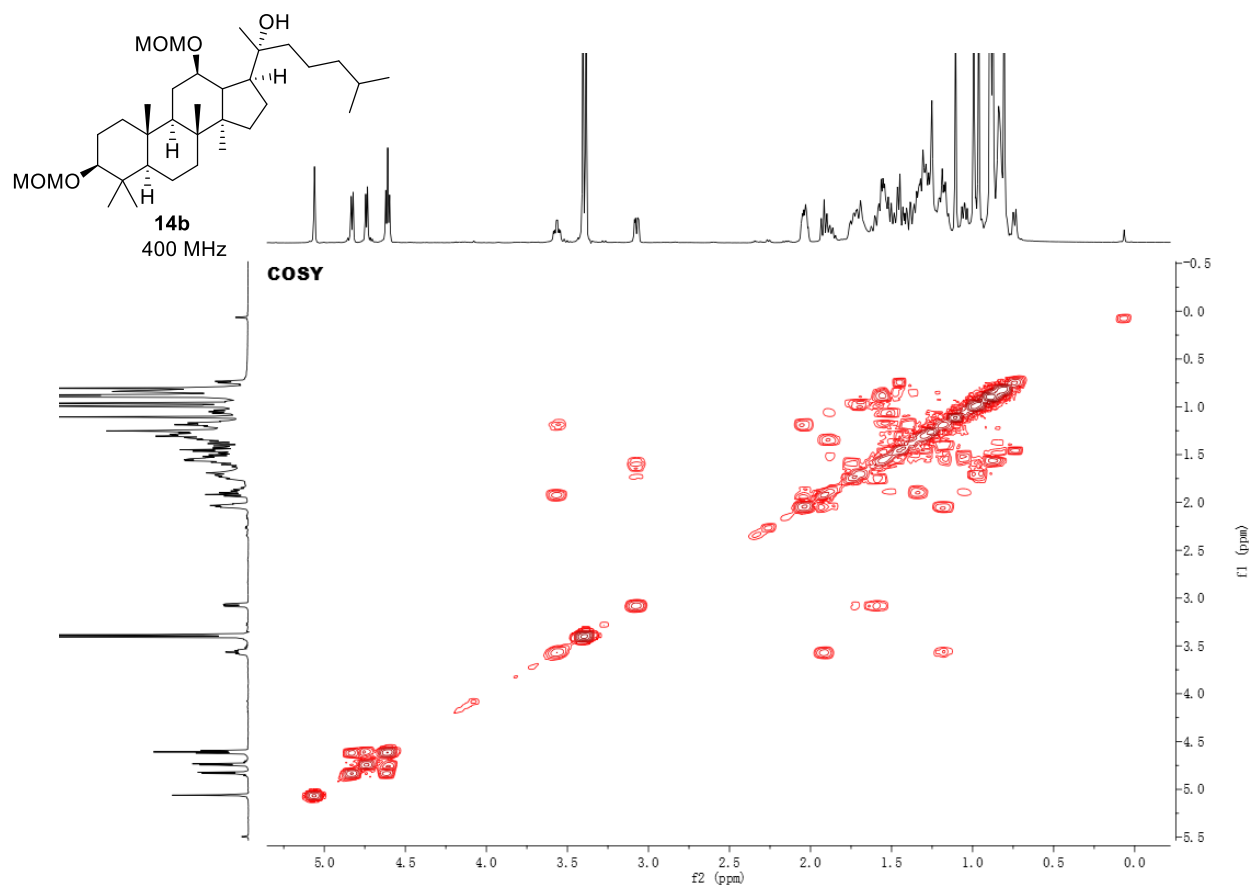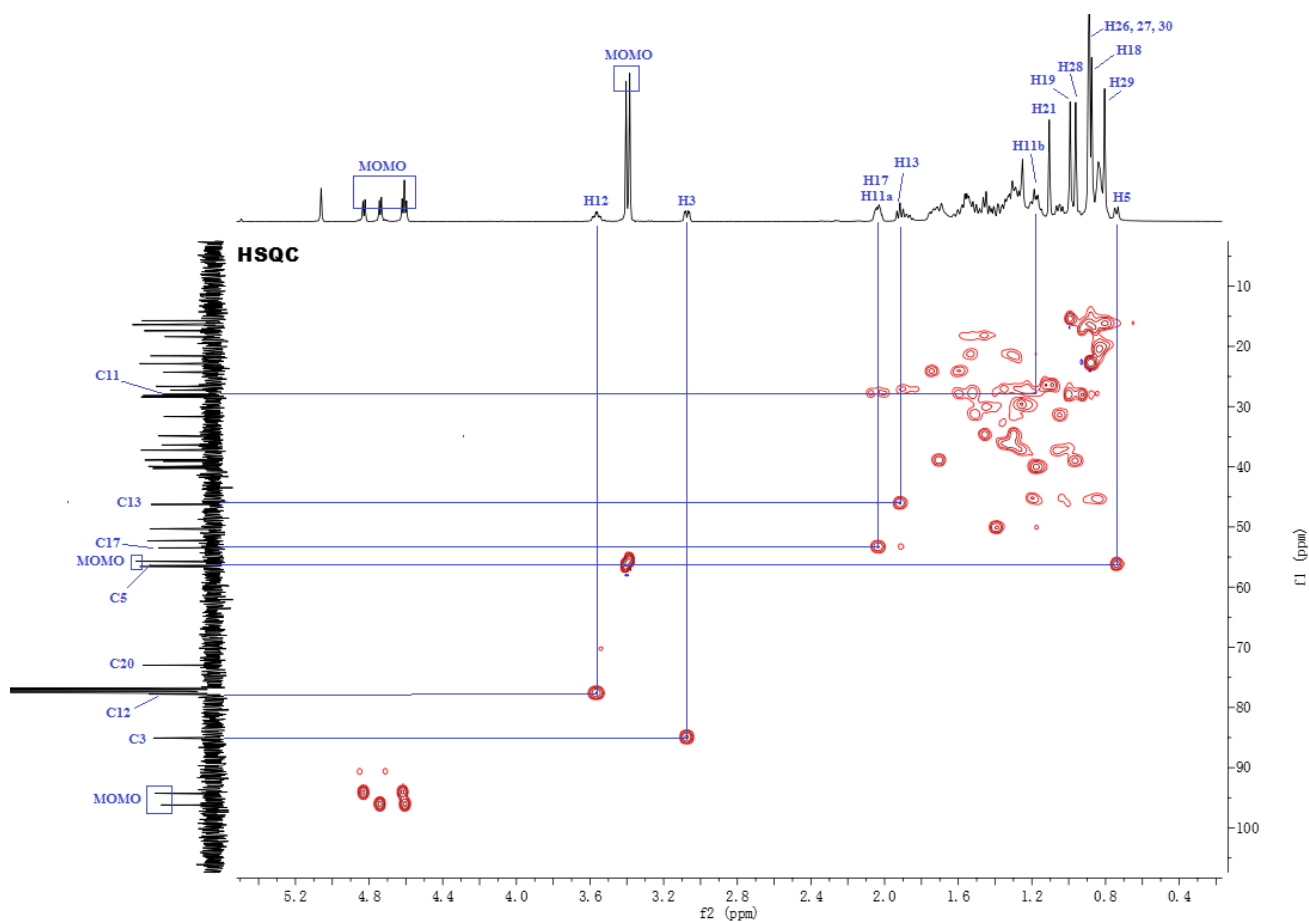

Supporting Information

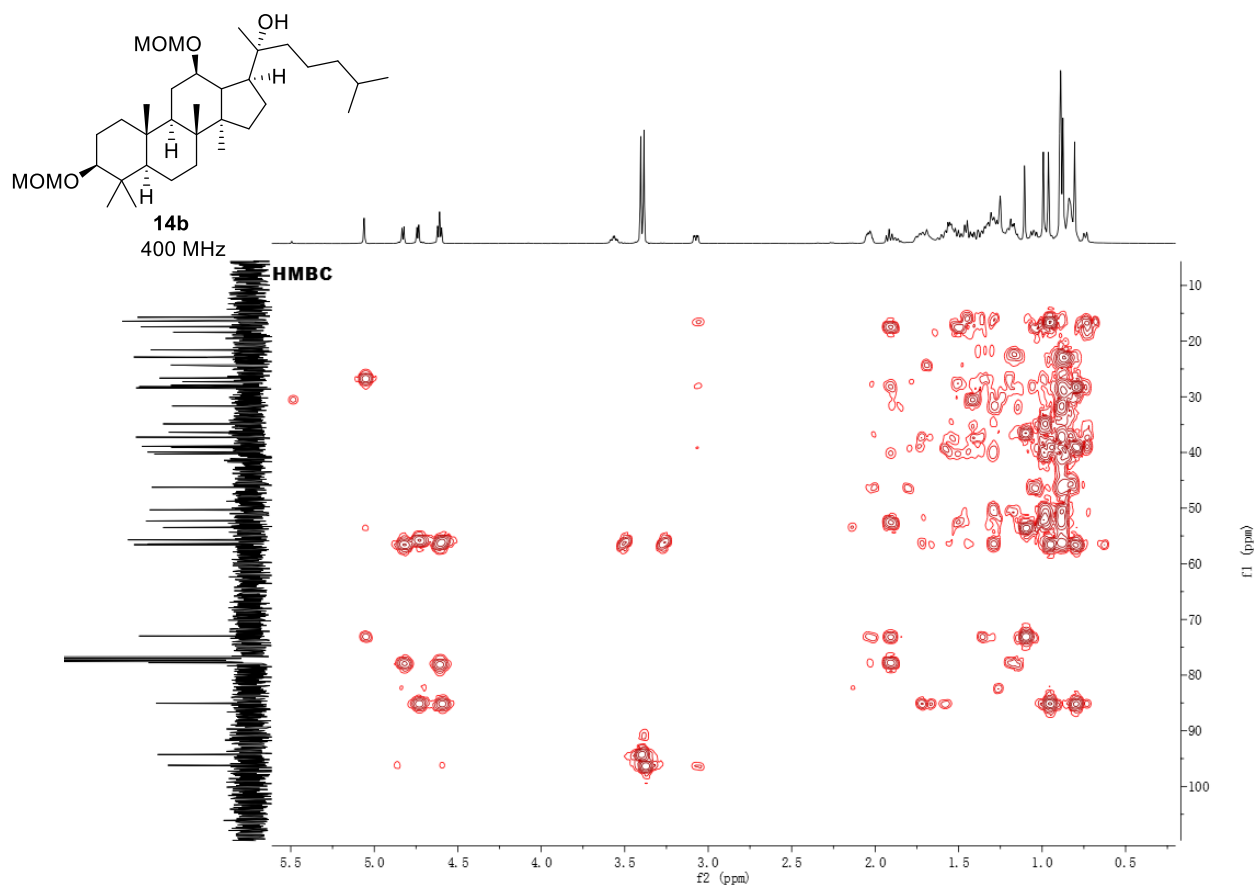

# Supporting Information

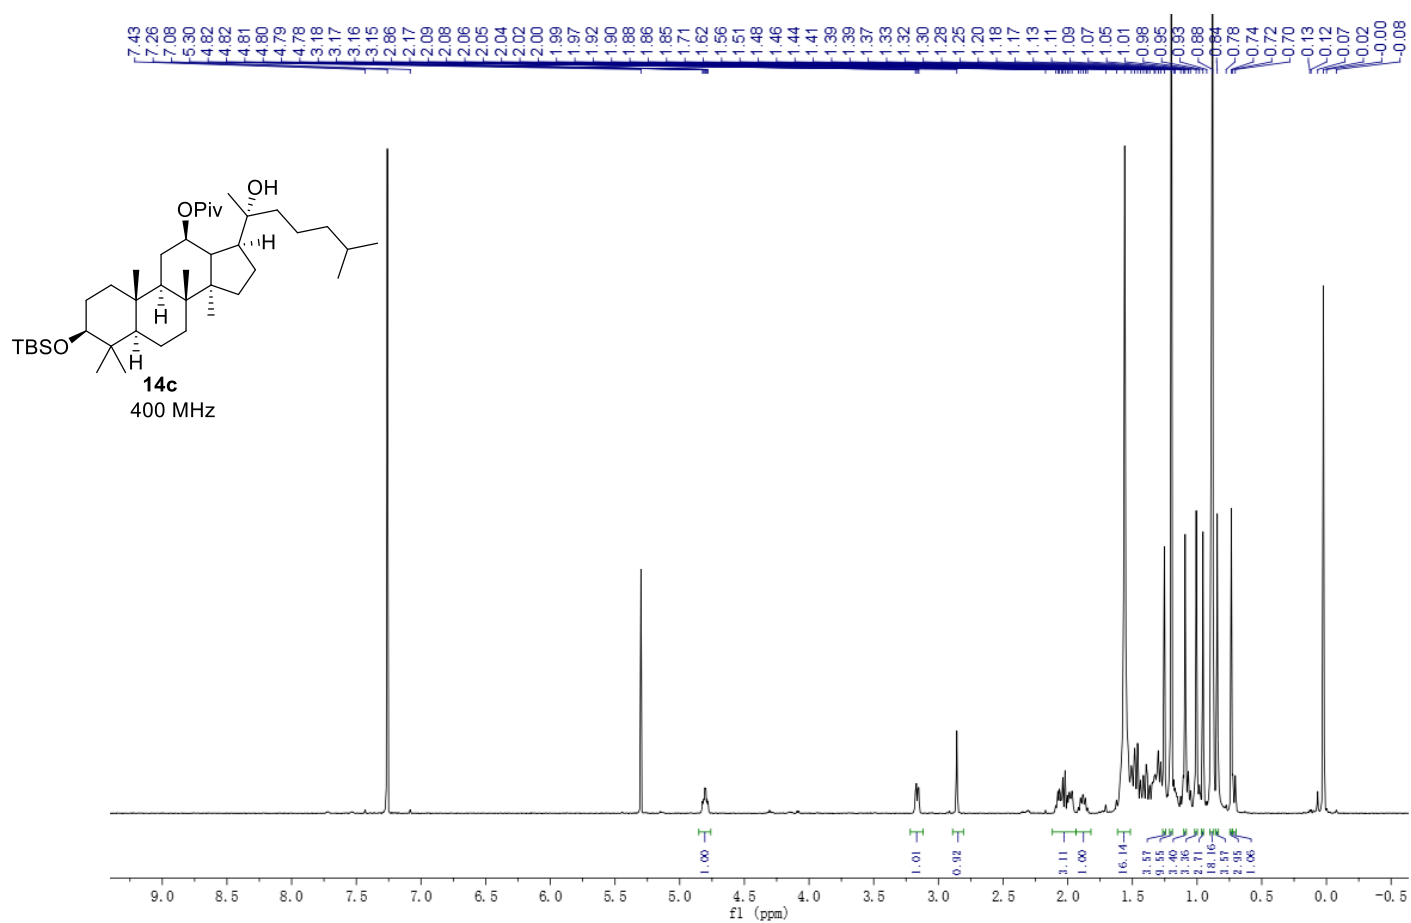

# Supporting Information

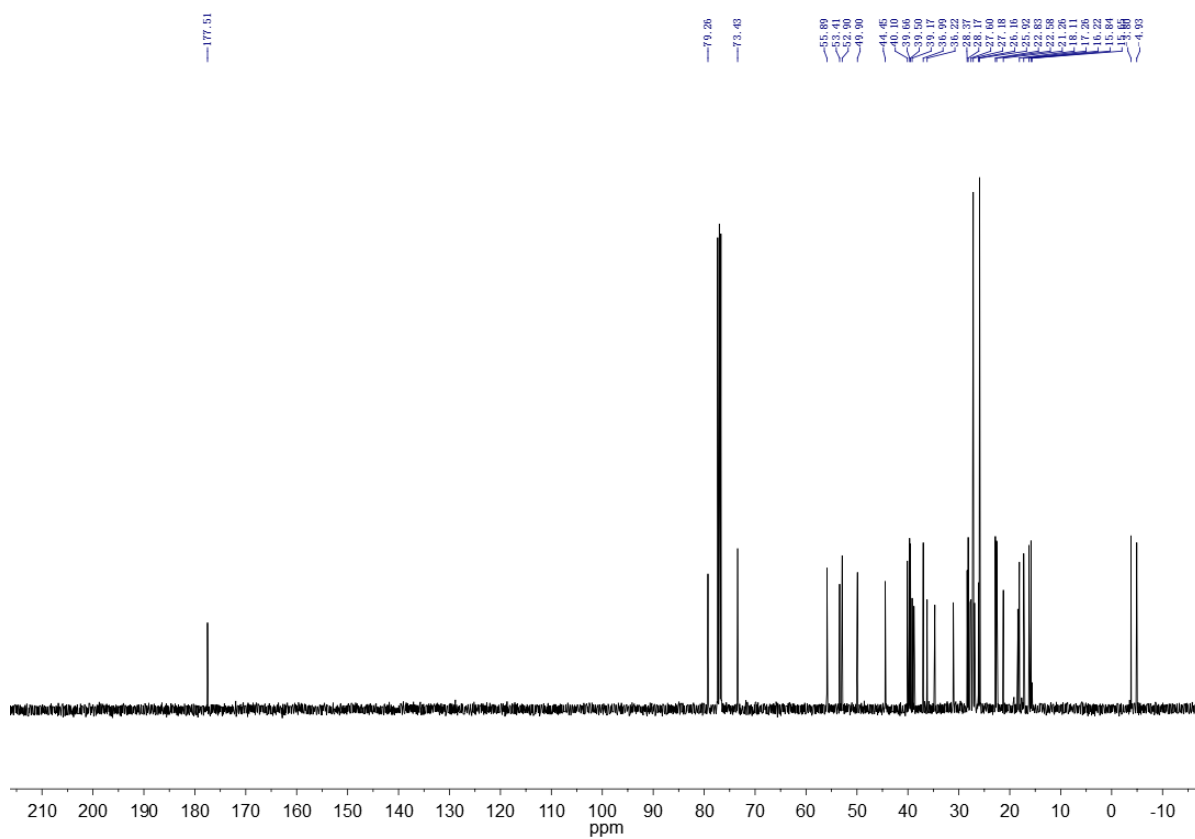

# Supporting Information

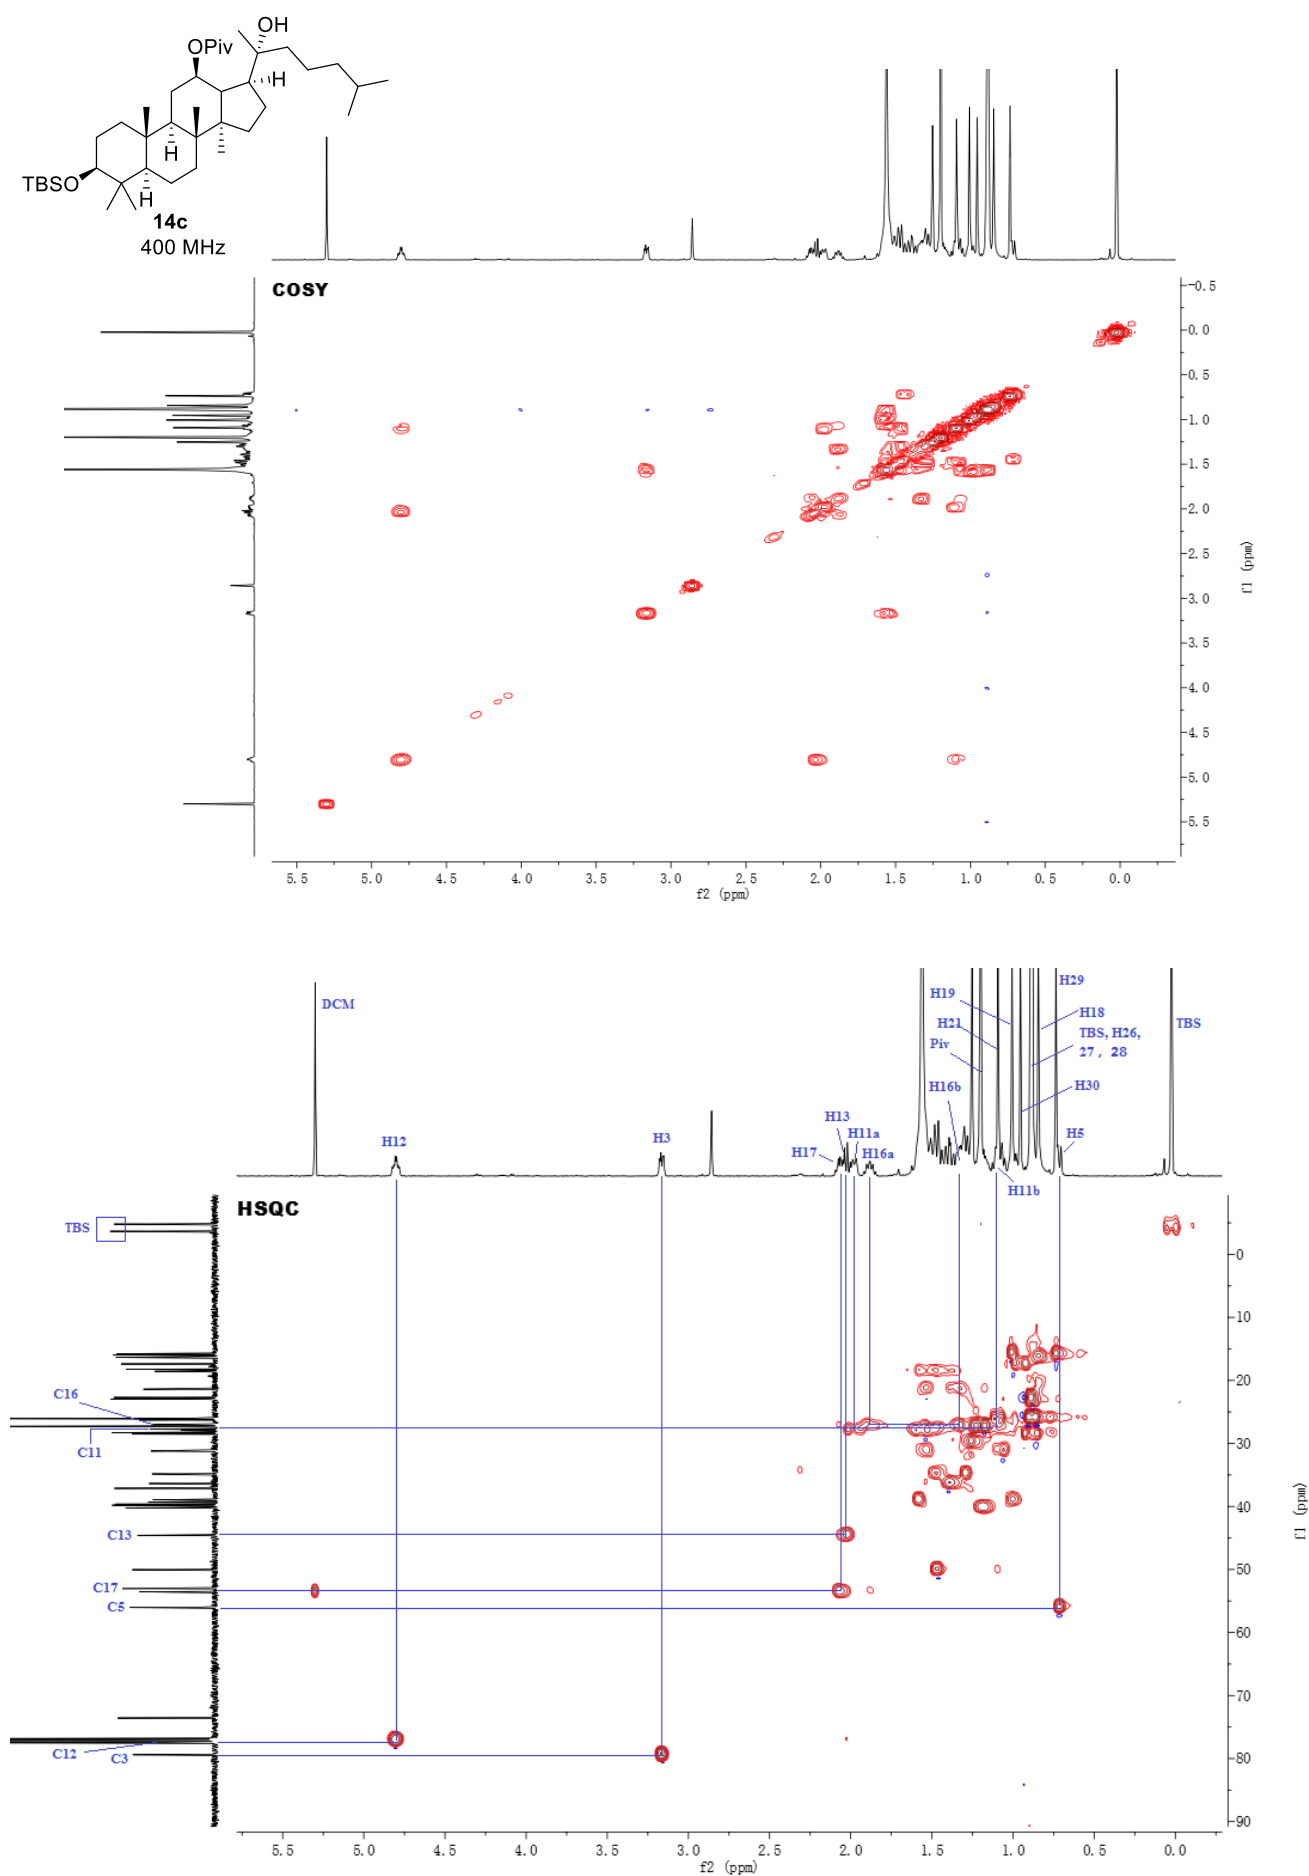

# Supporting Information

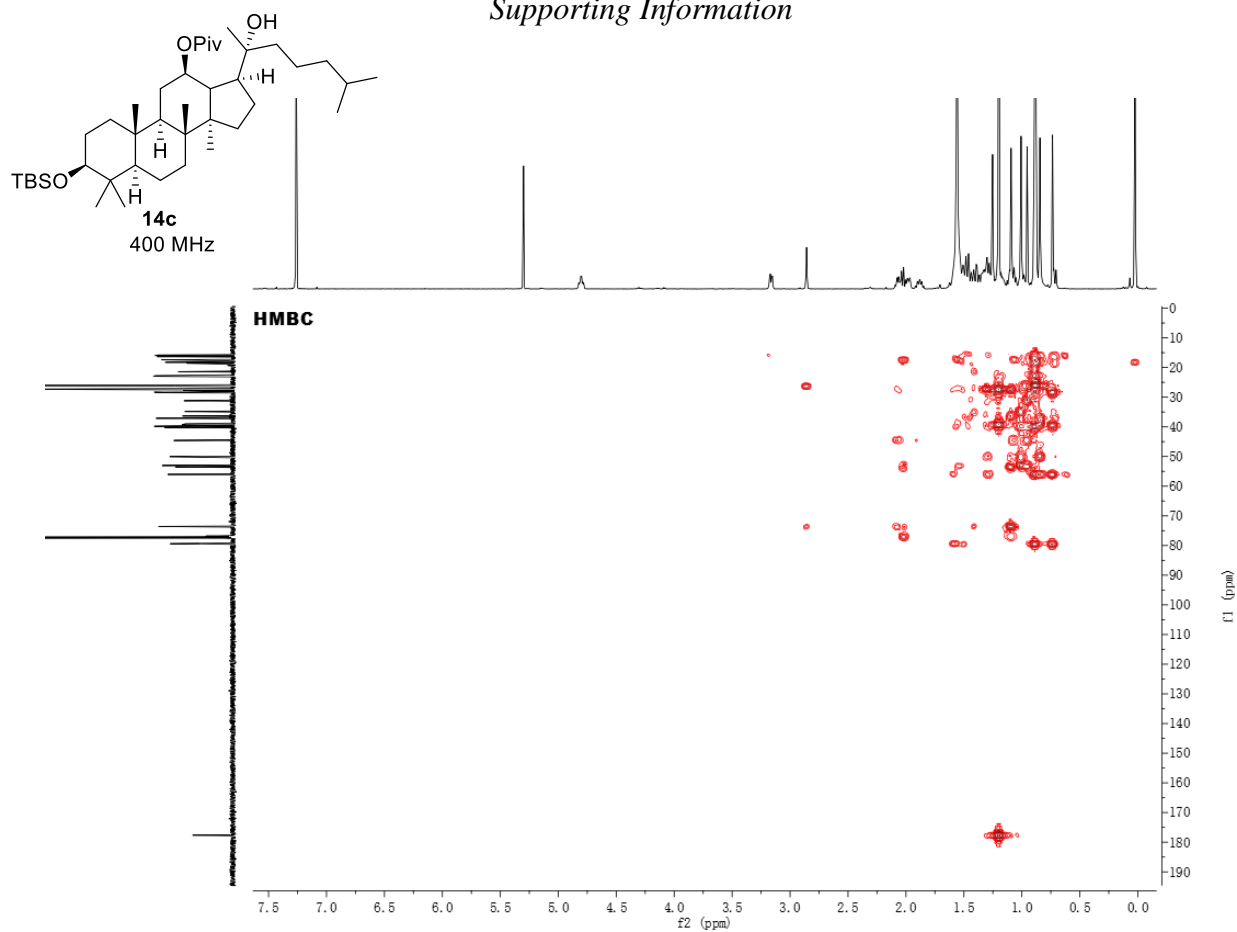



## Supporting Information

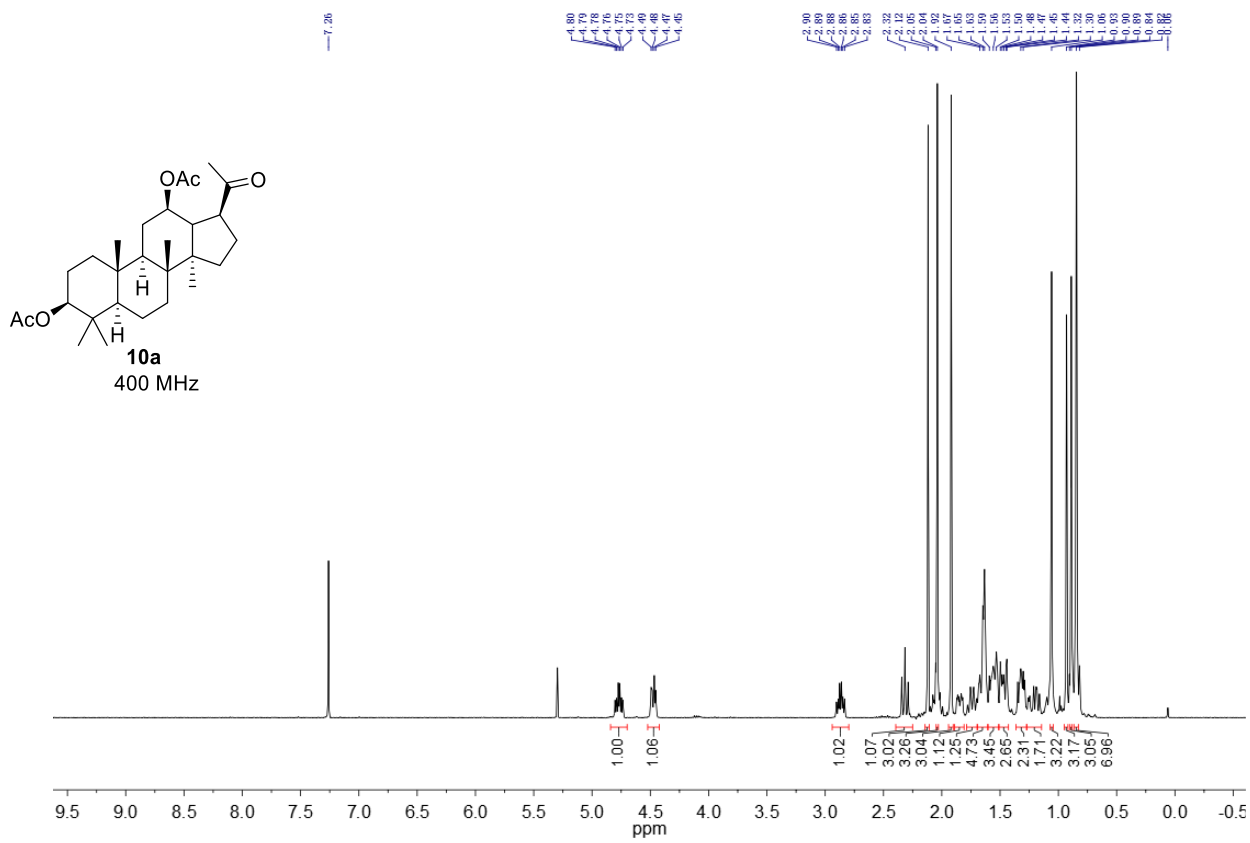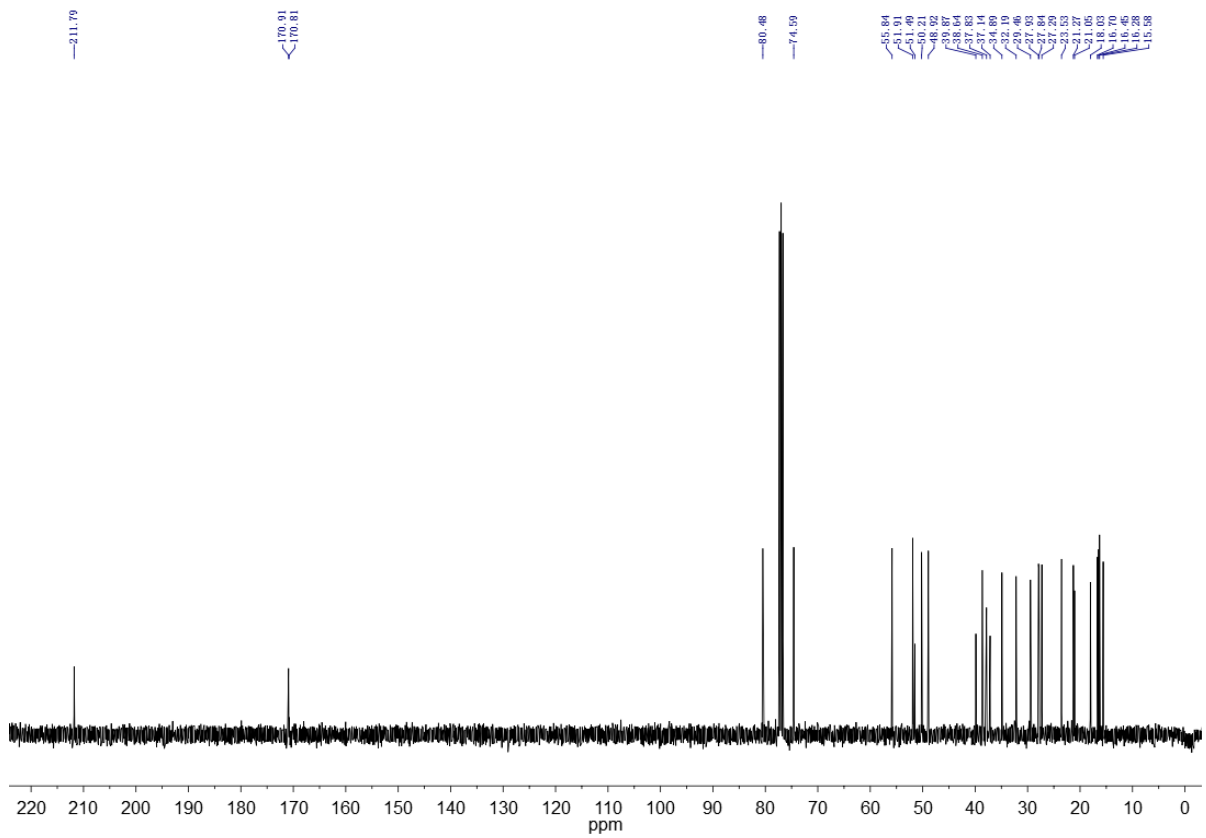

# Supporting Information

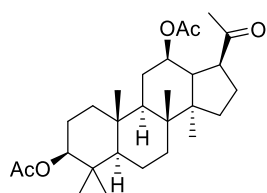

400 MHz

**COSY**

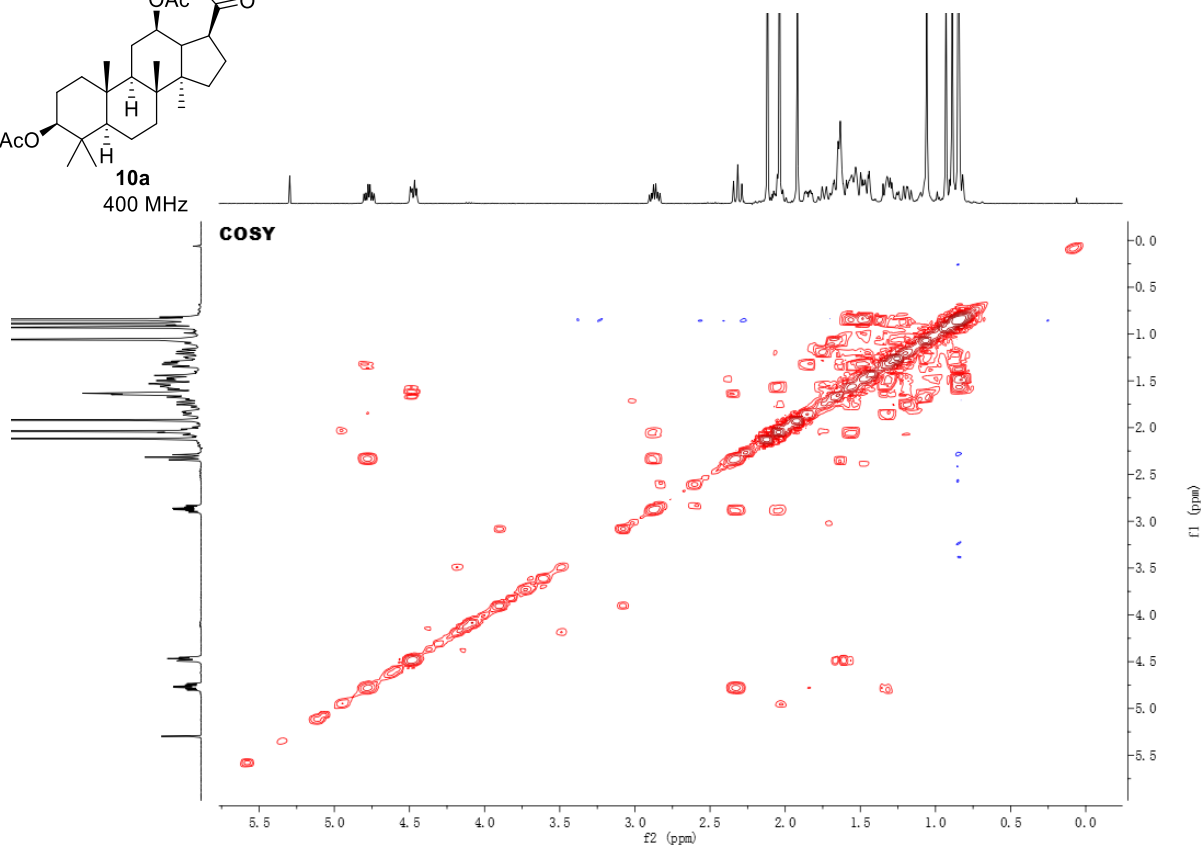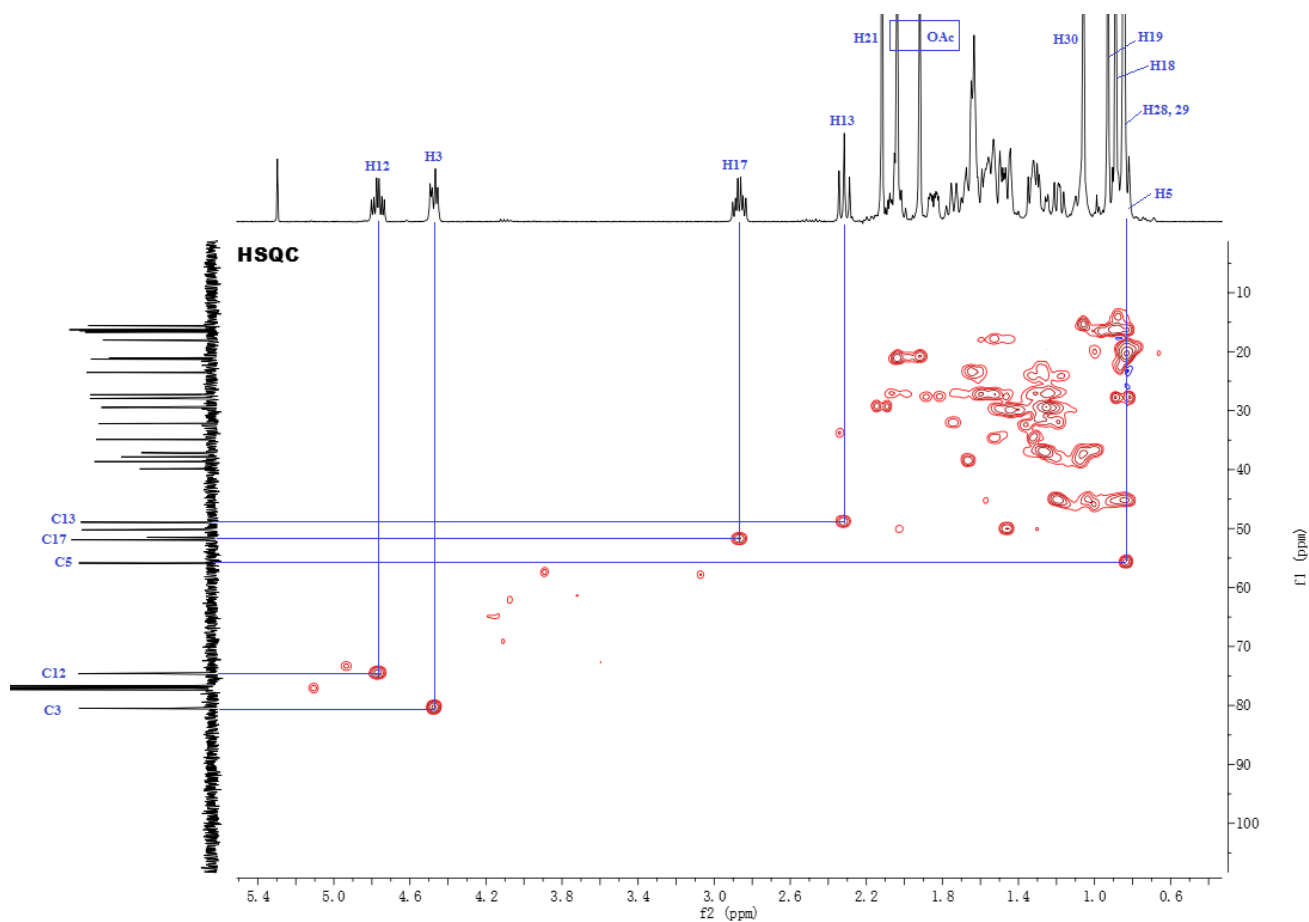

Supporting Information

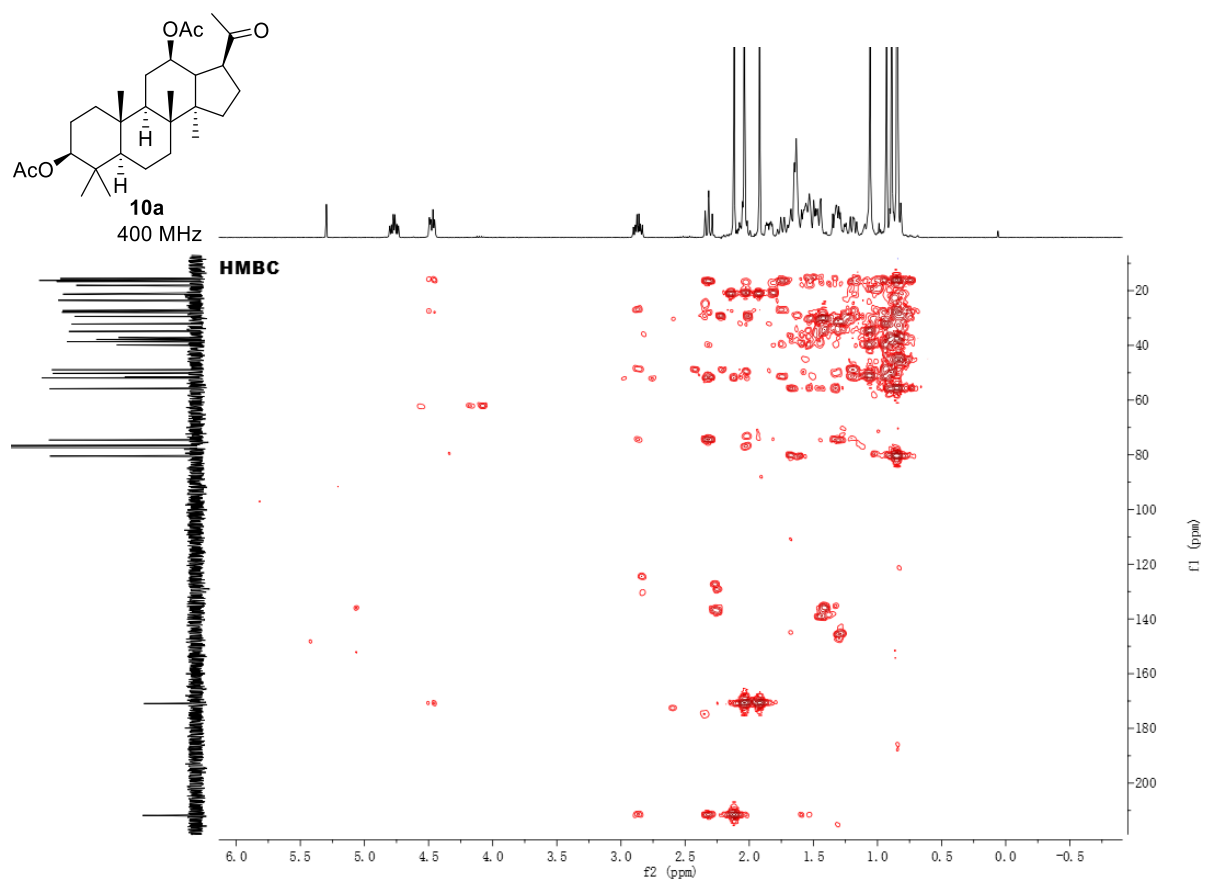

# Supporting Information

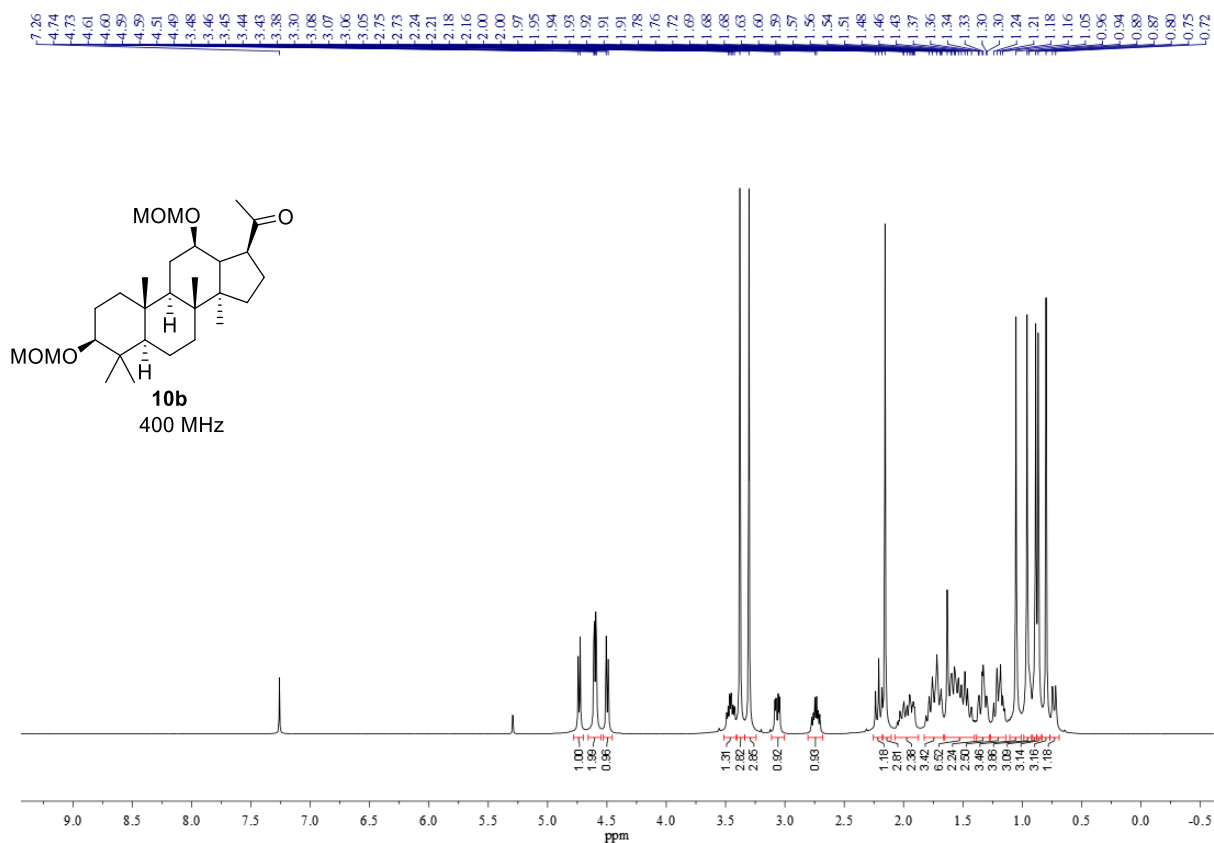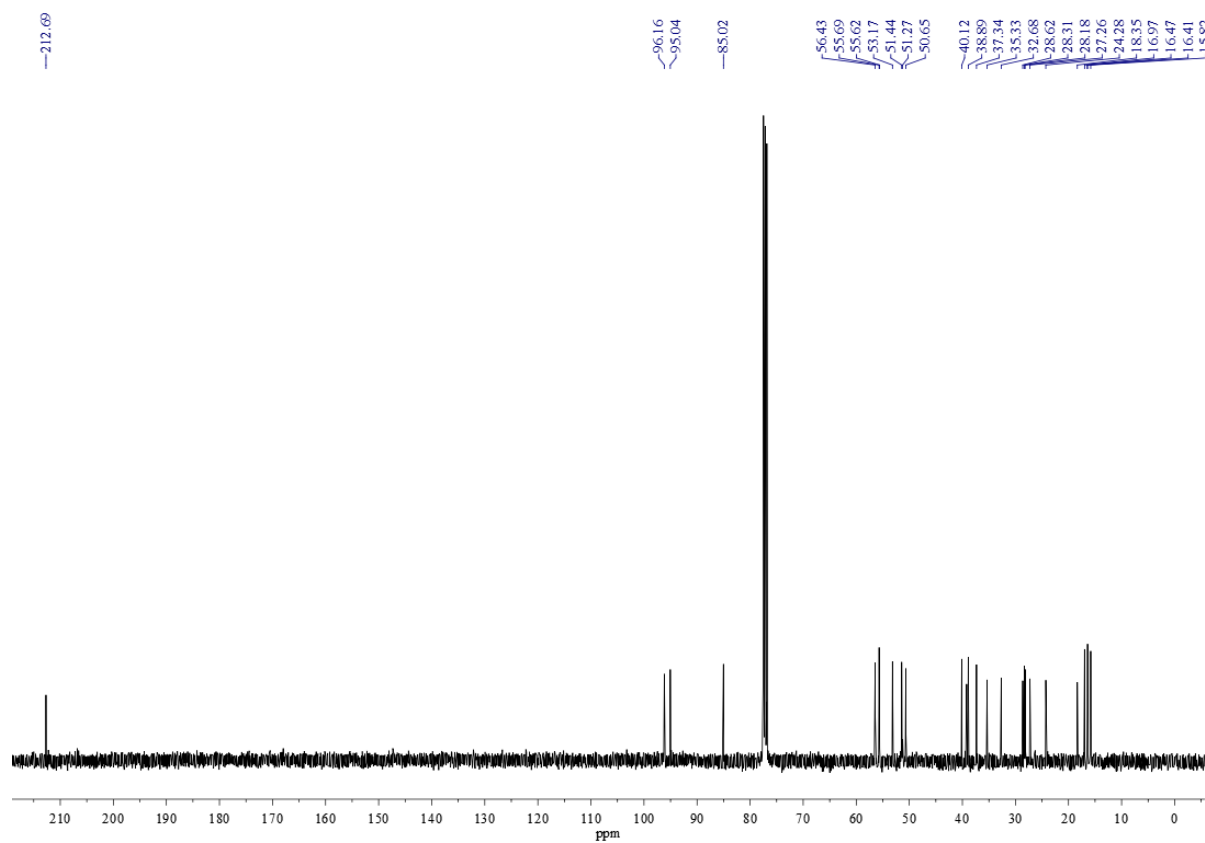

# Supporting Information

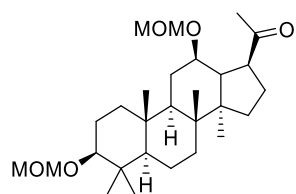

**10b**  
400 MHz

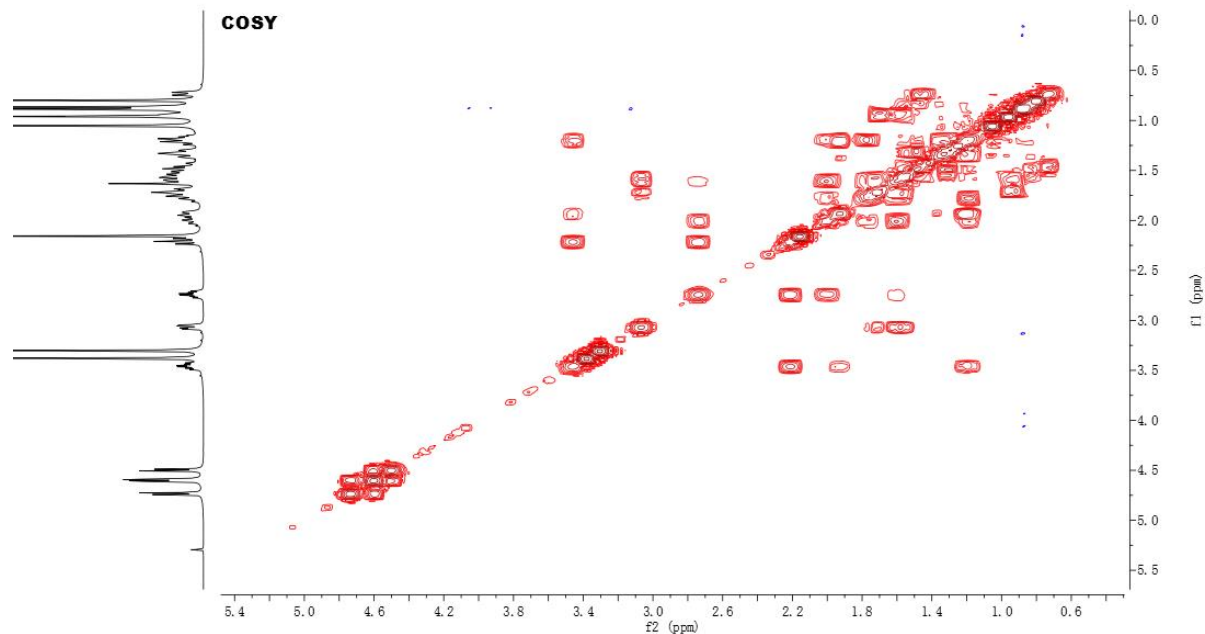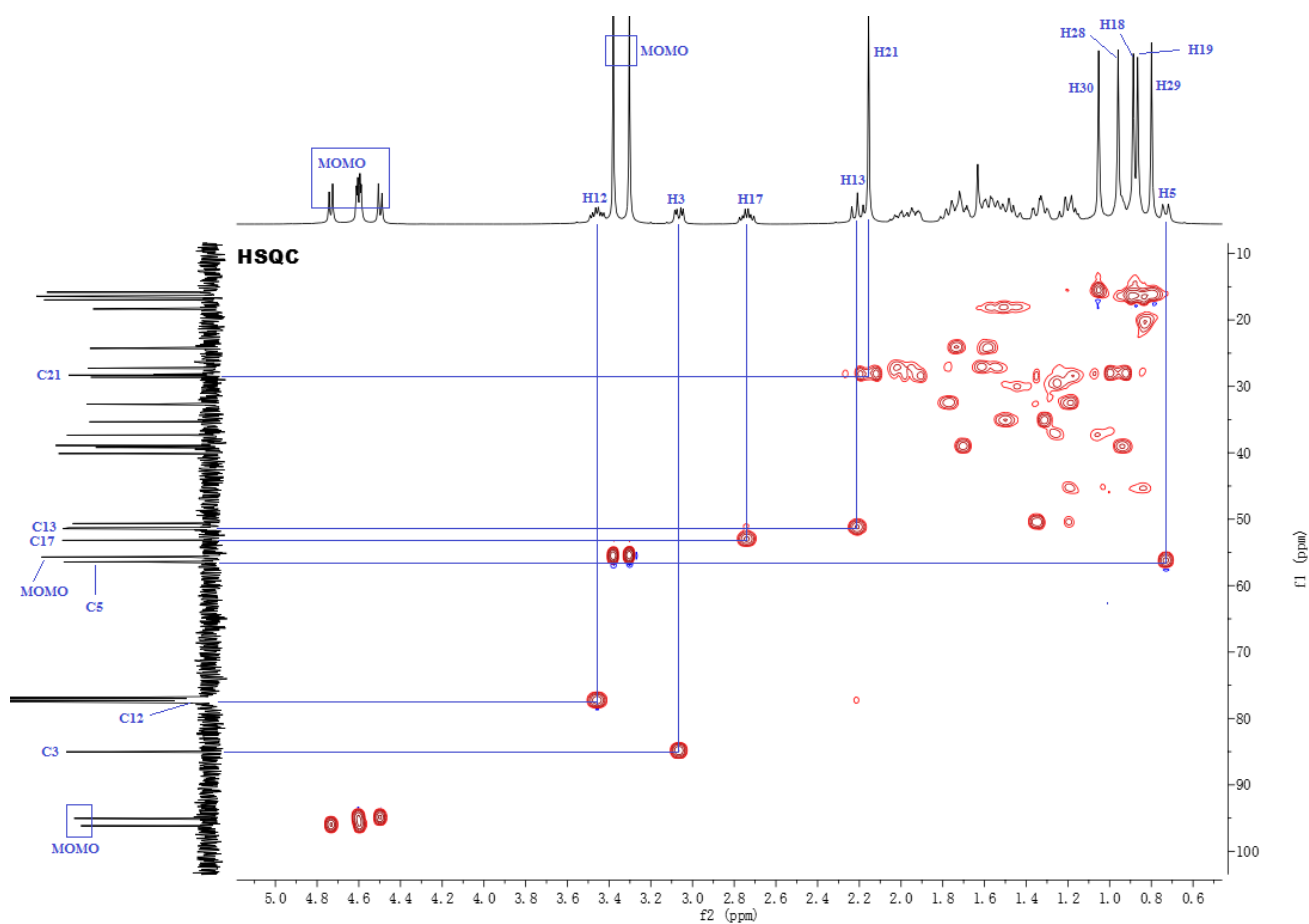

# Supporting Information

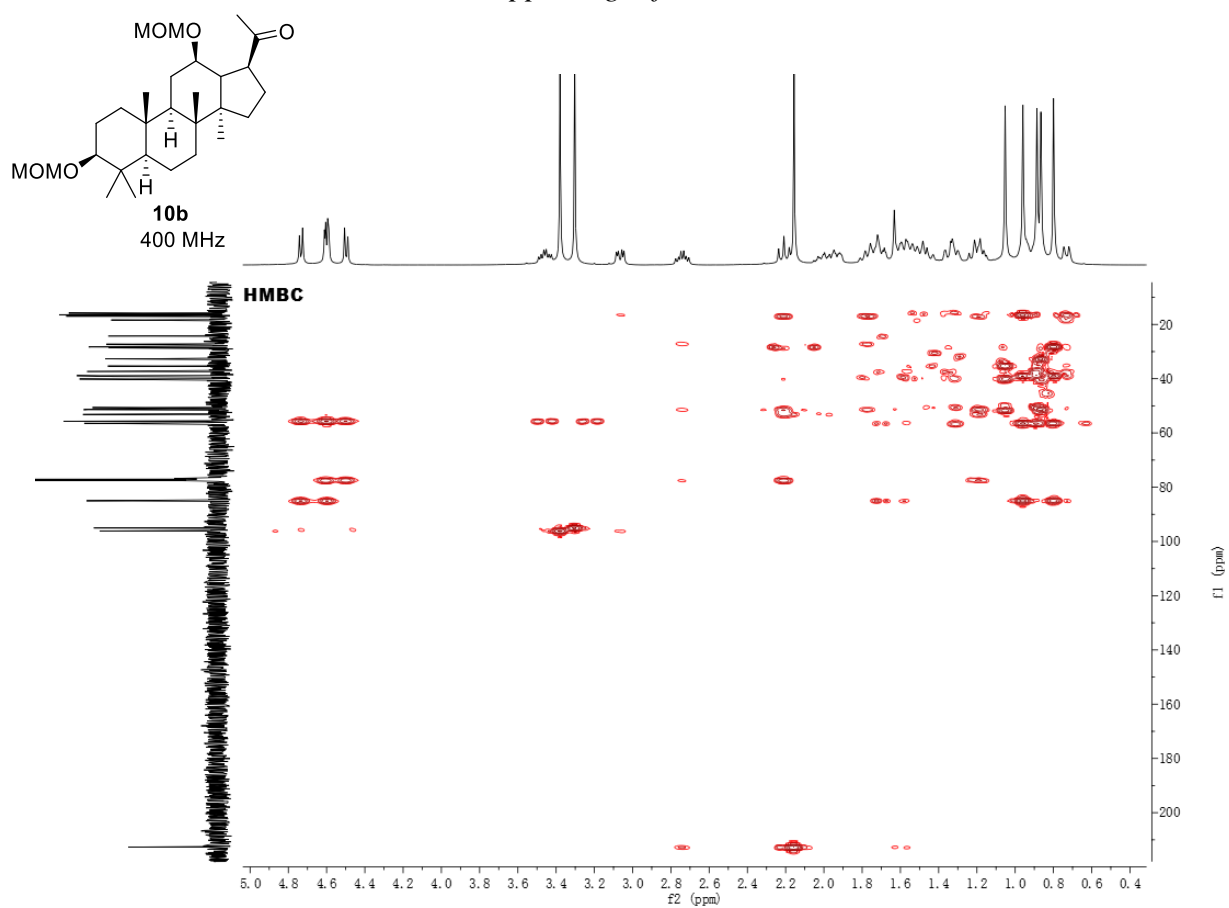

# Supporting Information

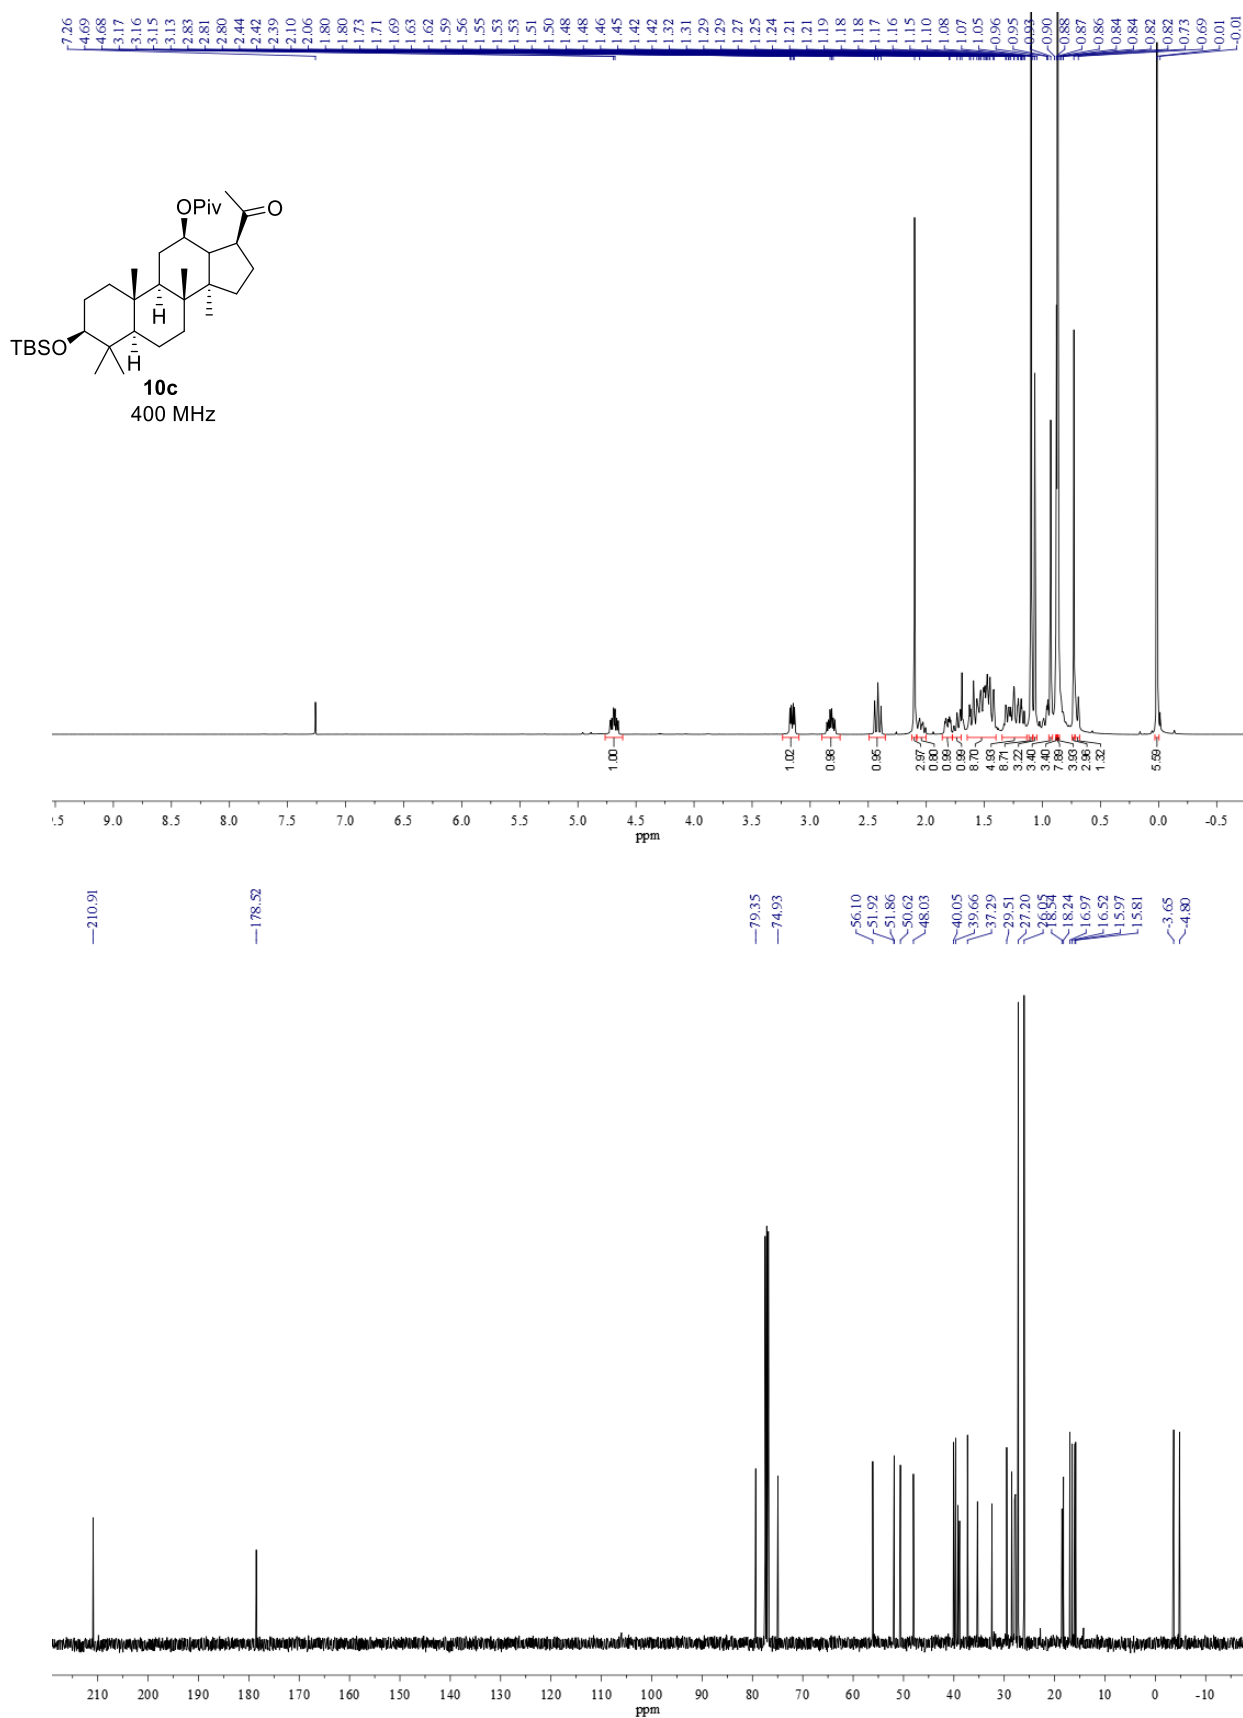

# Supporting Information

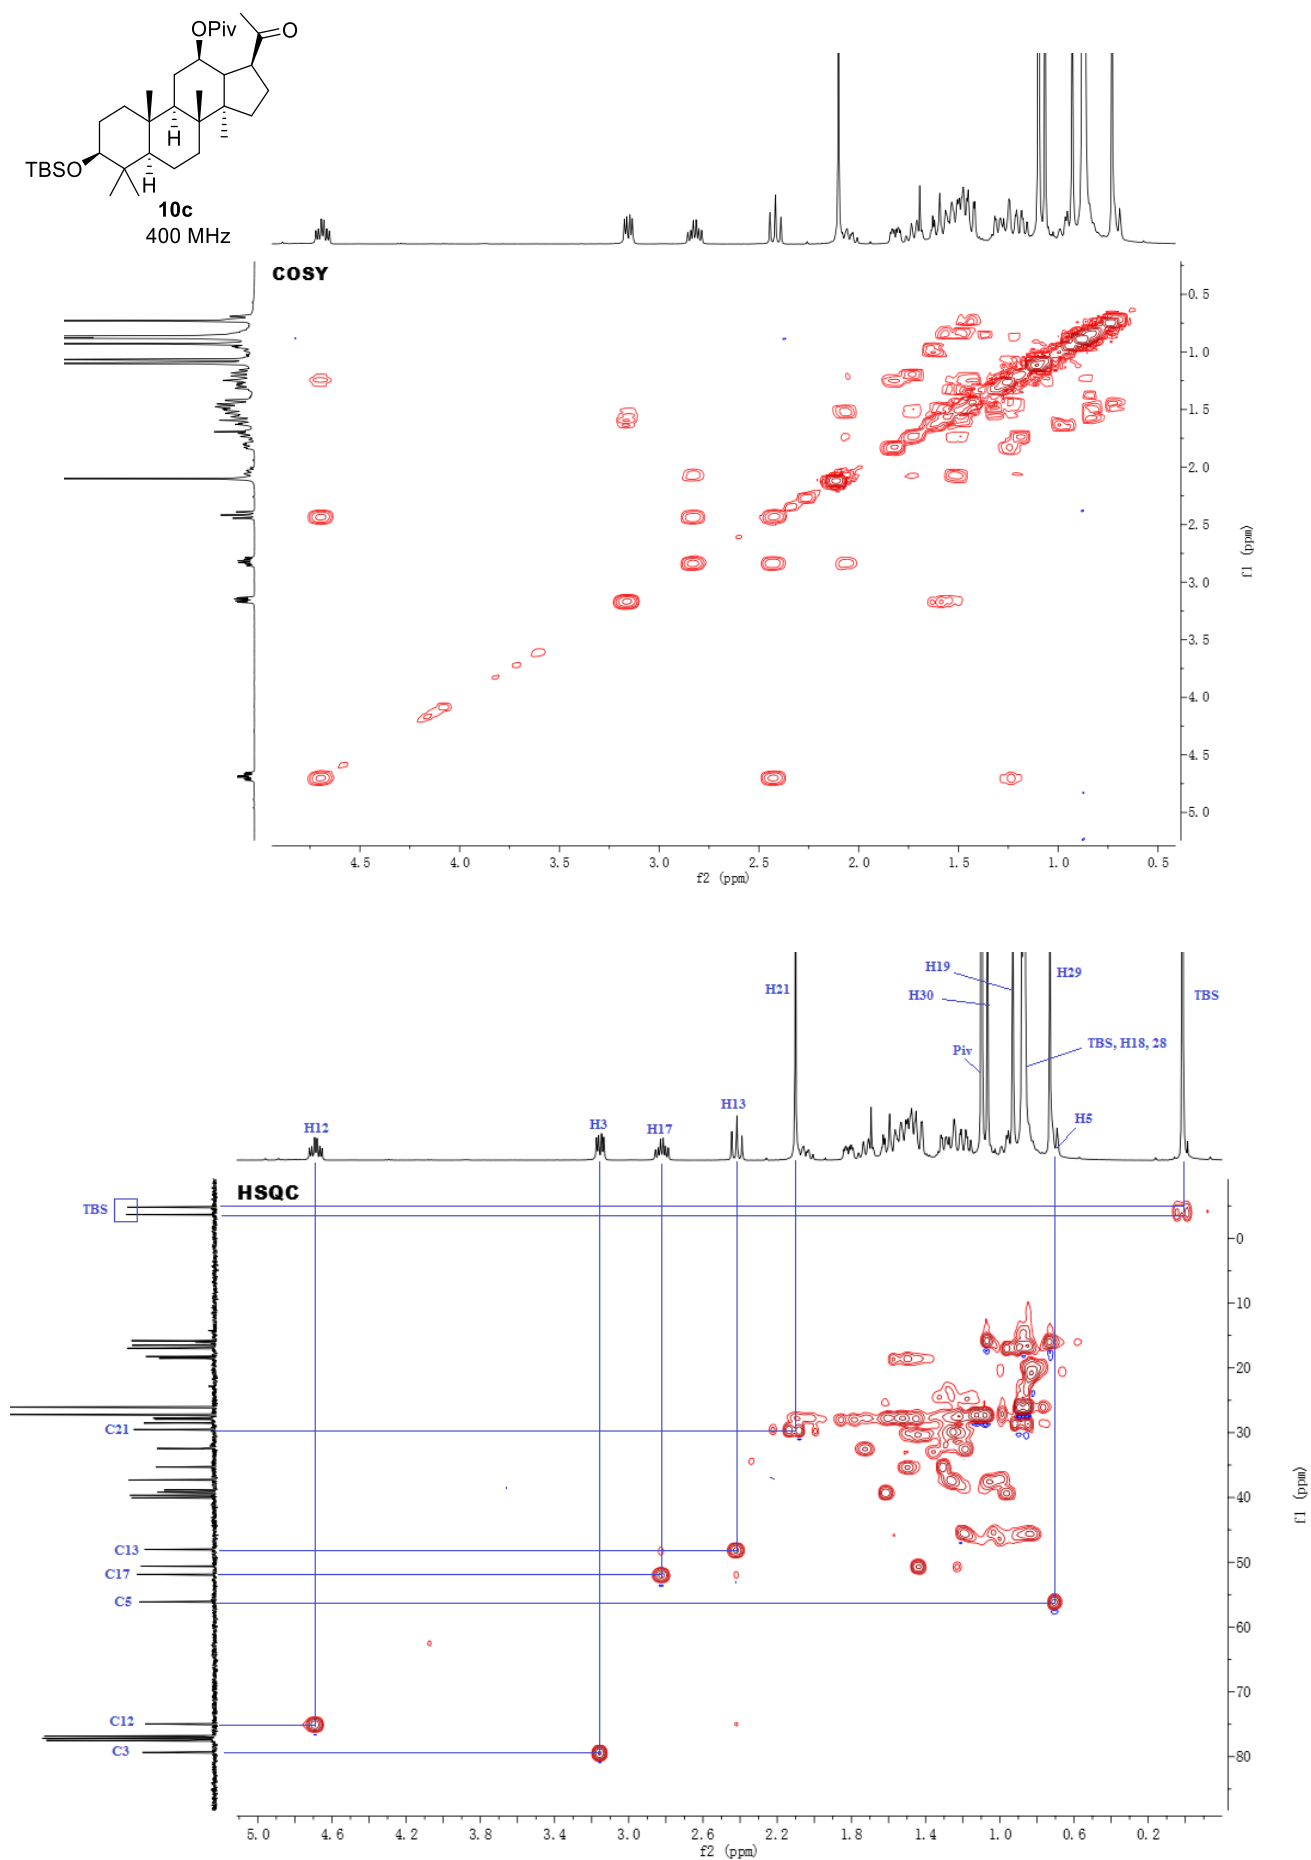



Supporting Information

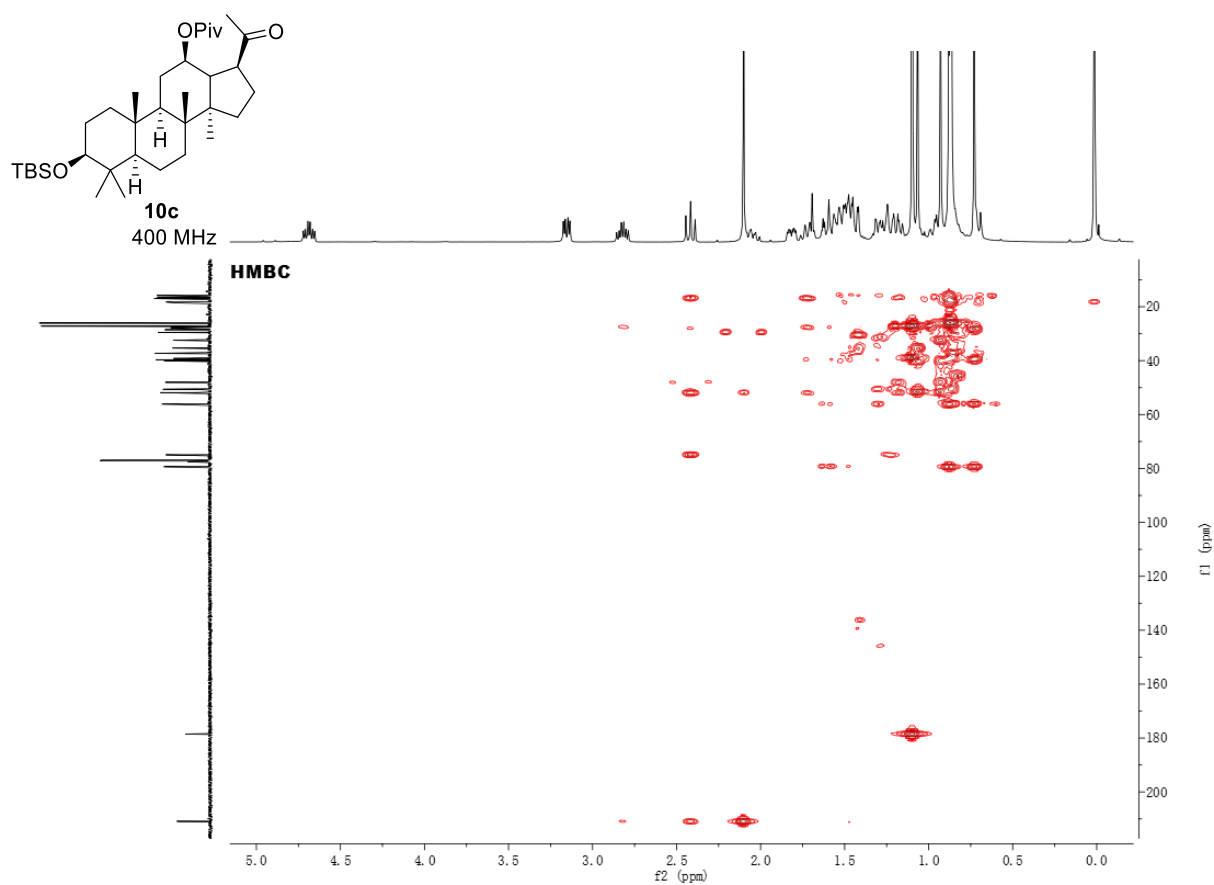

# Supporting Information

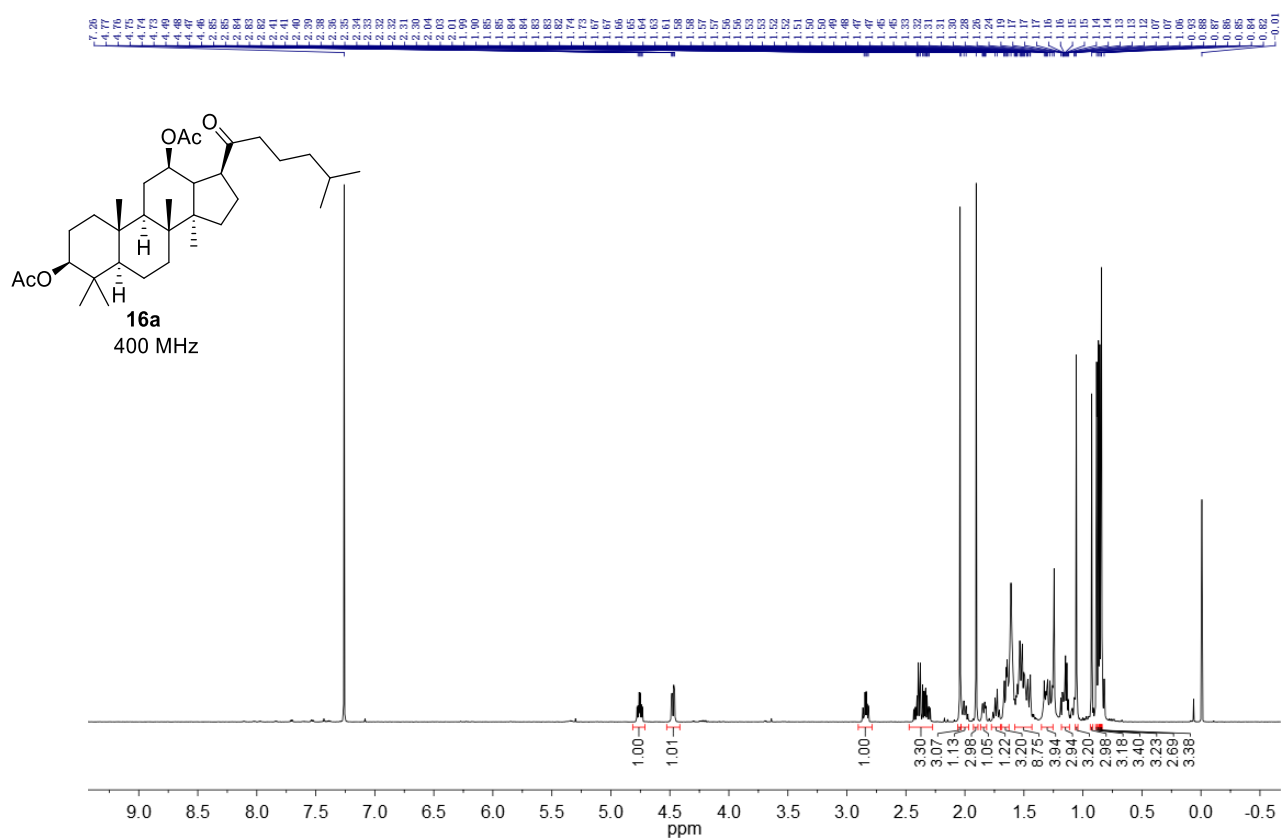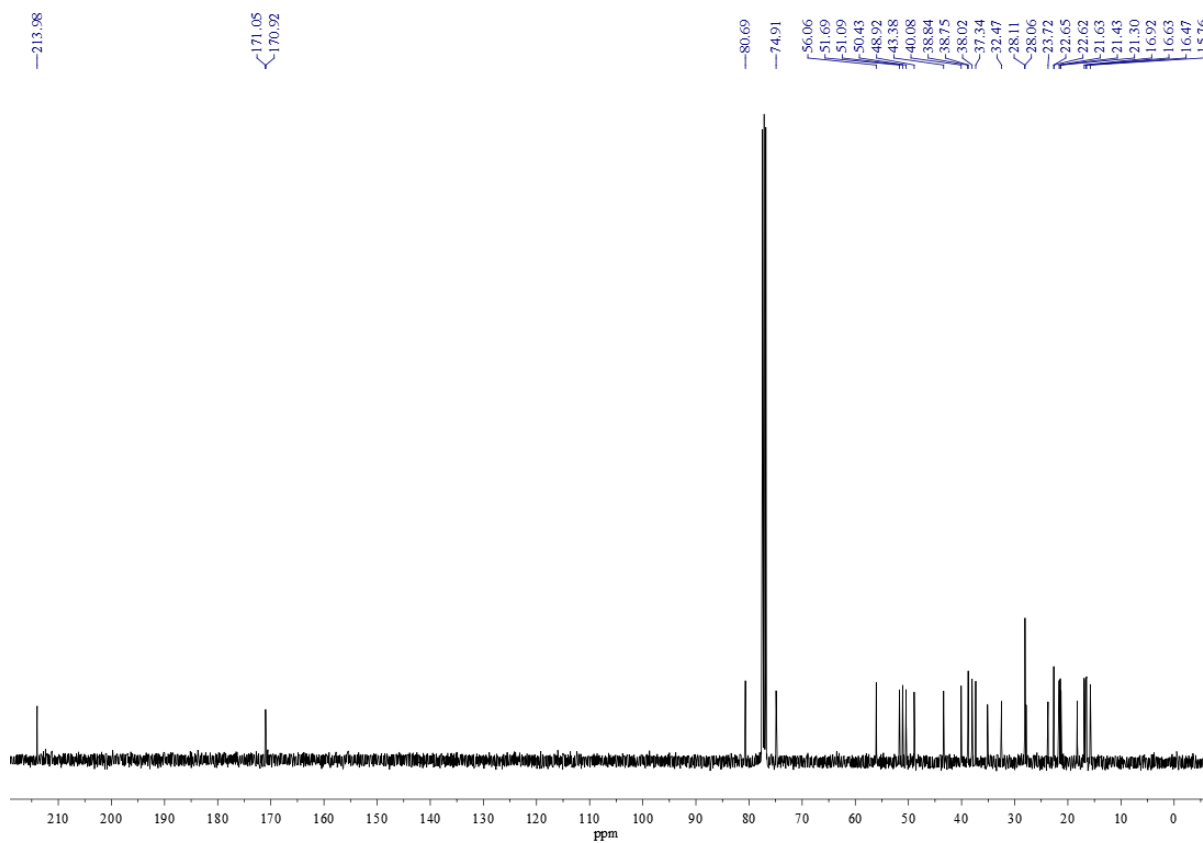

# Supporting Information

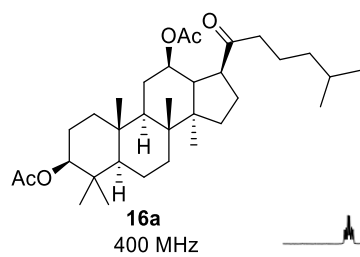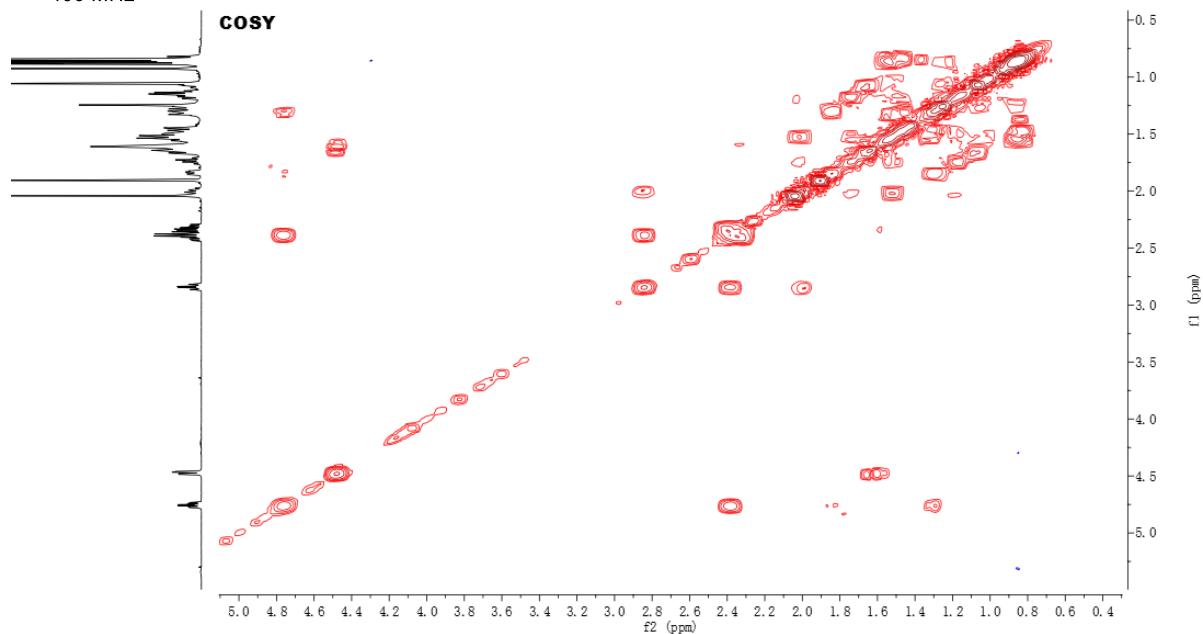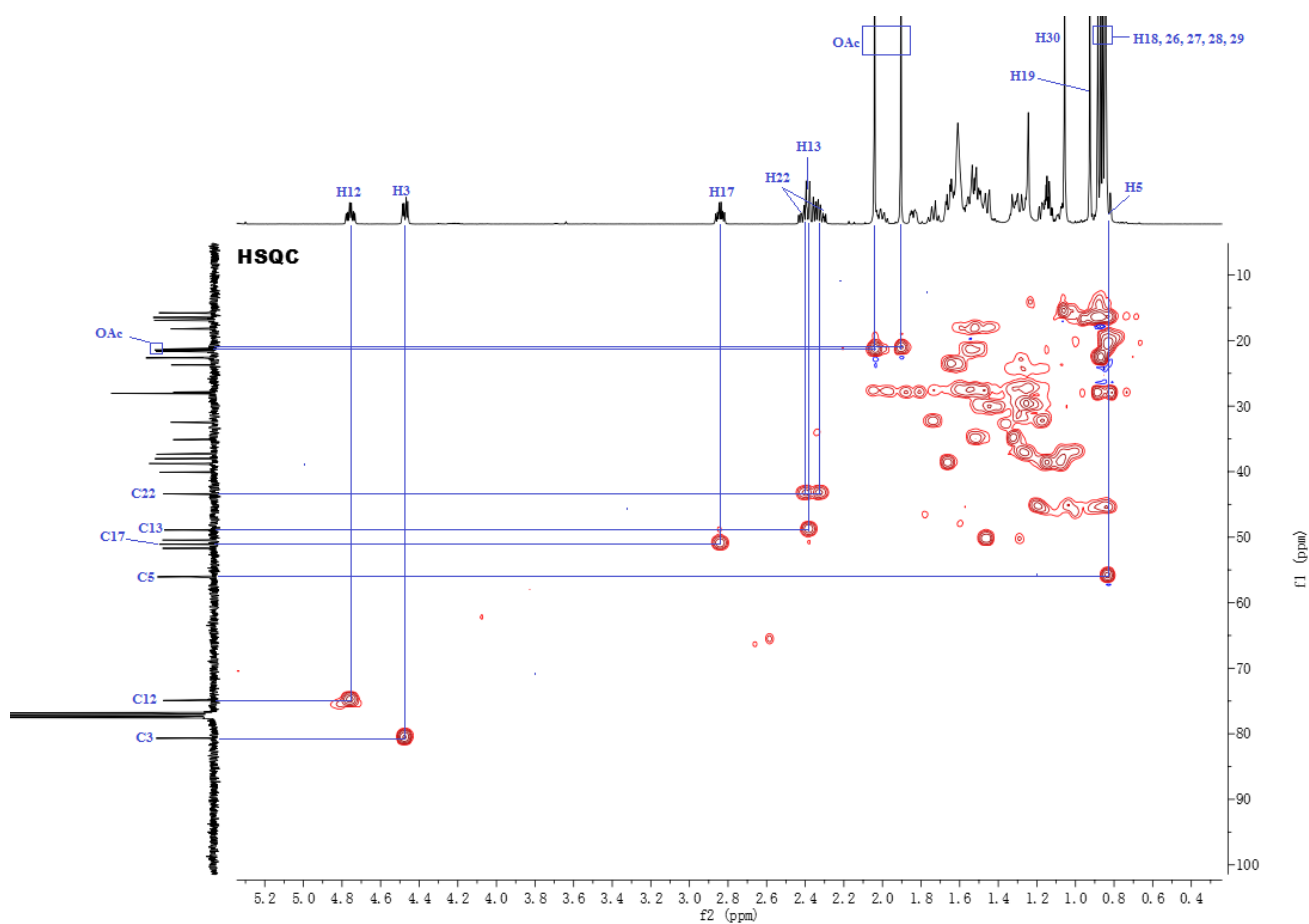

# Supporting Information

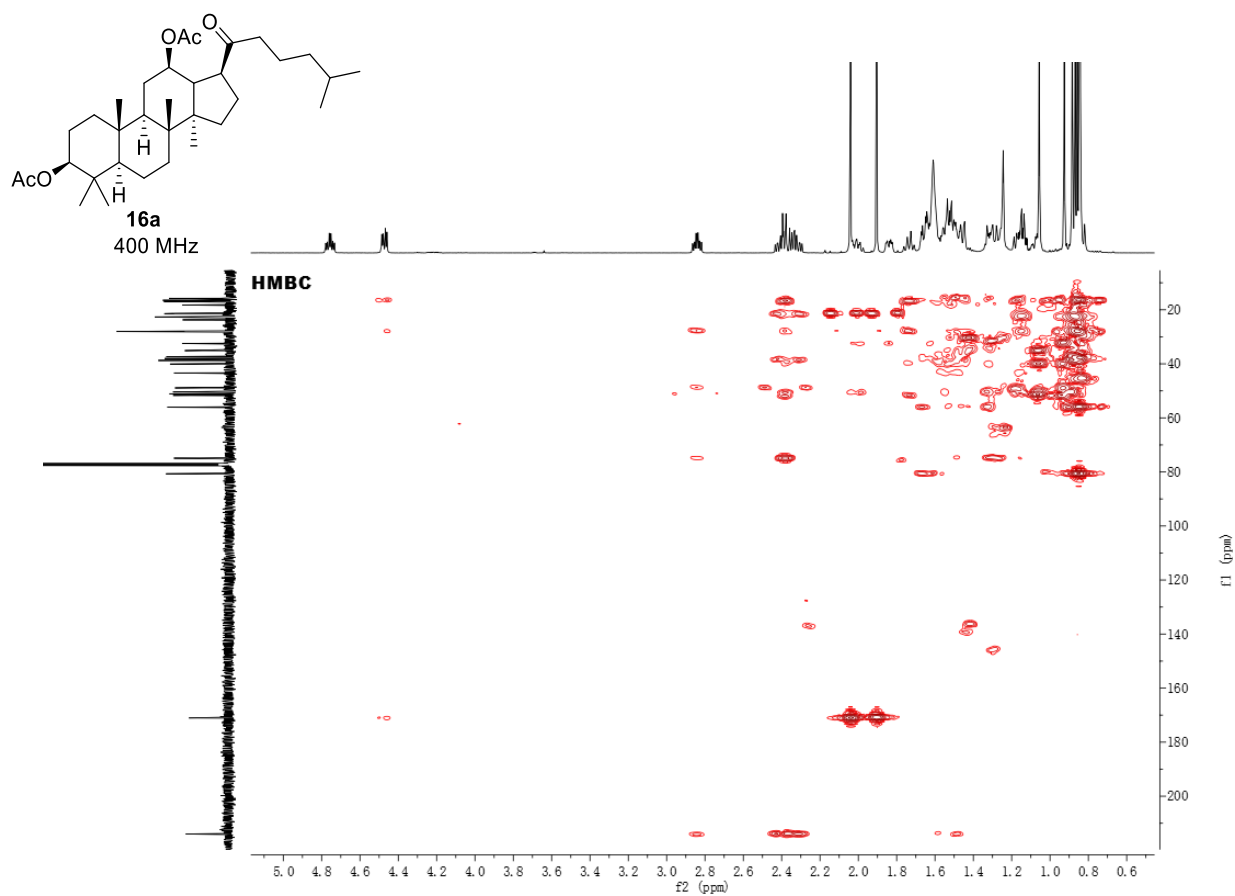

# Supporting Information

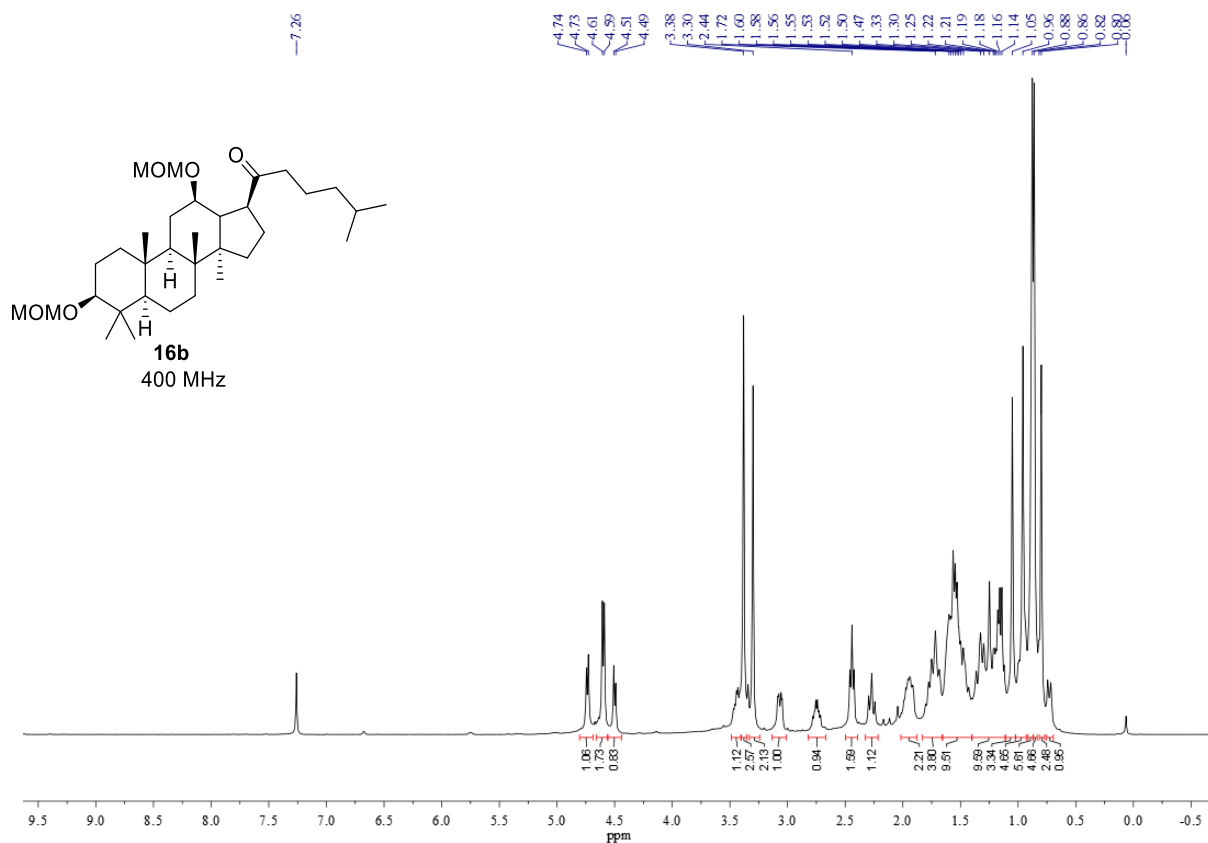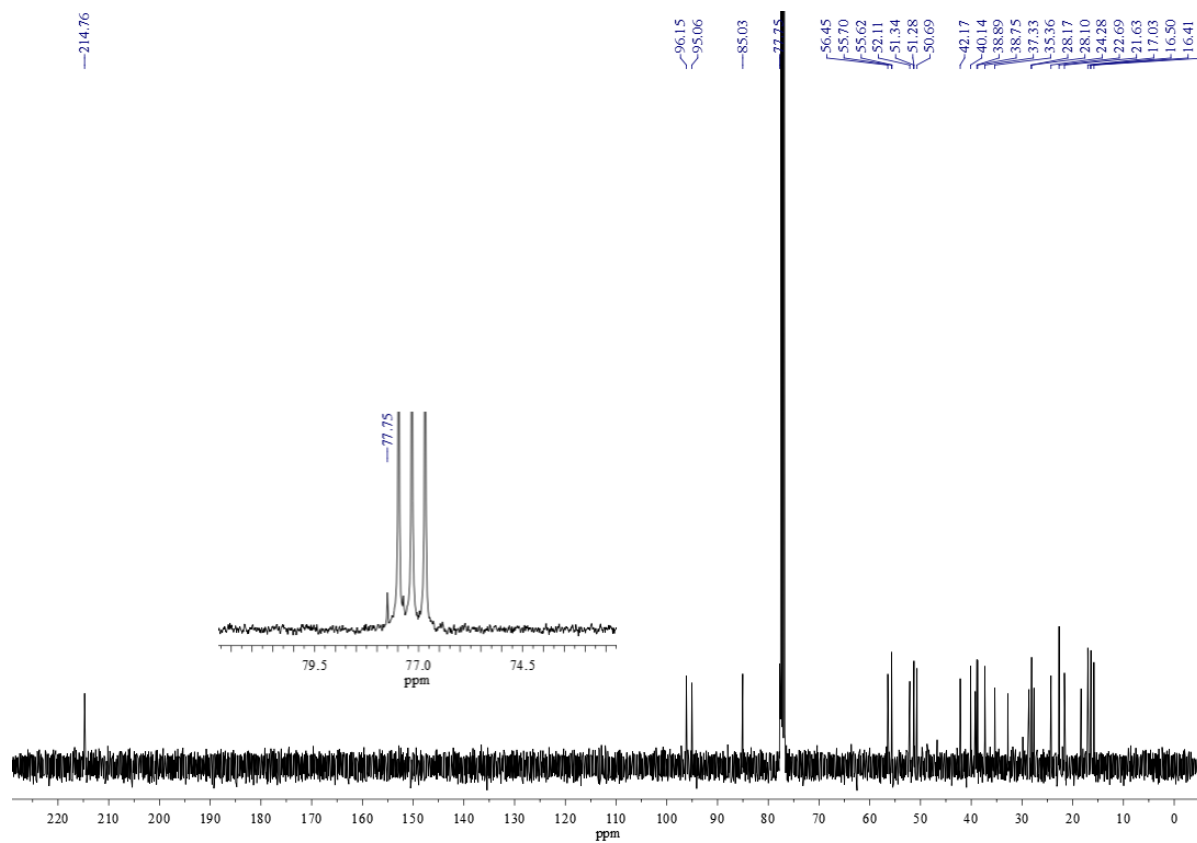

# Supporting Information

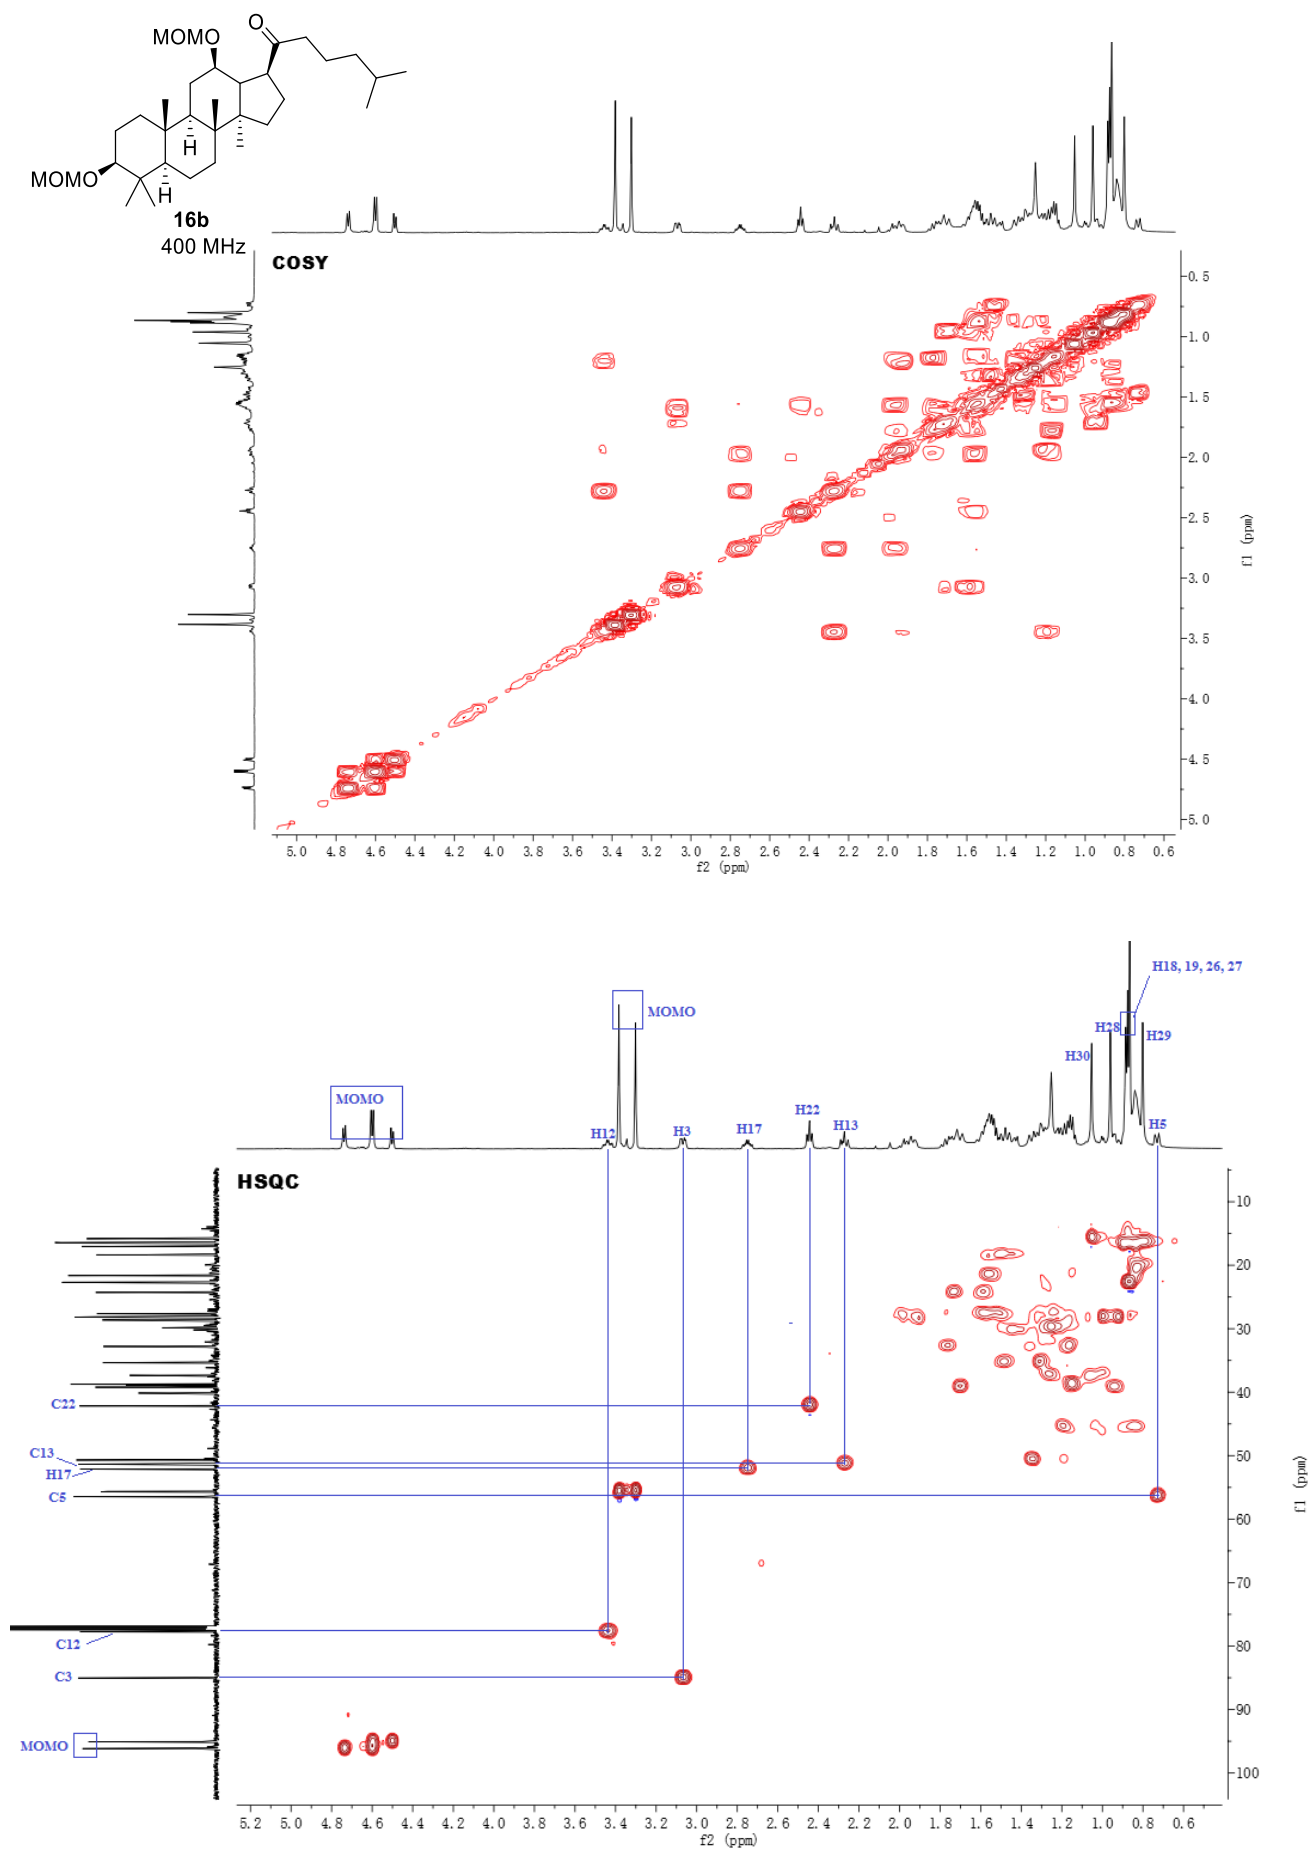

Supporting Information

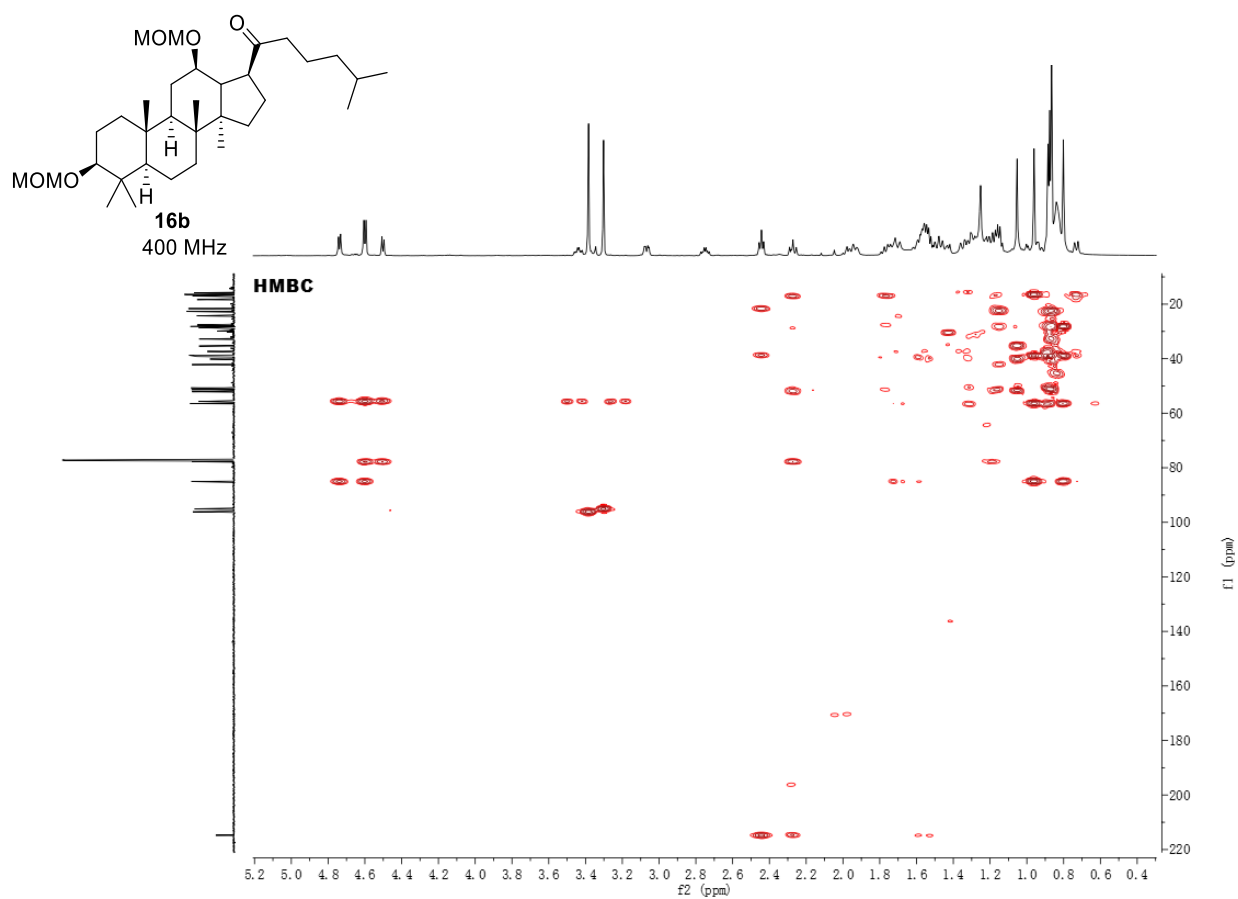

# Supporting Information

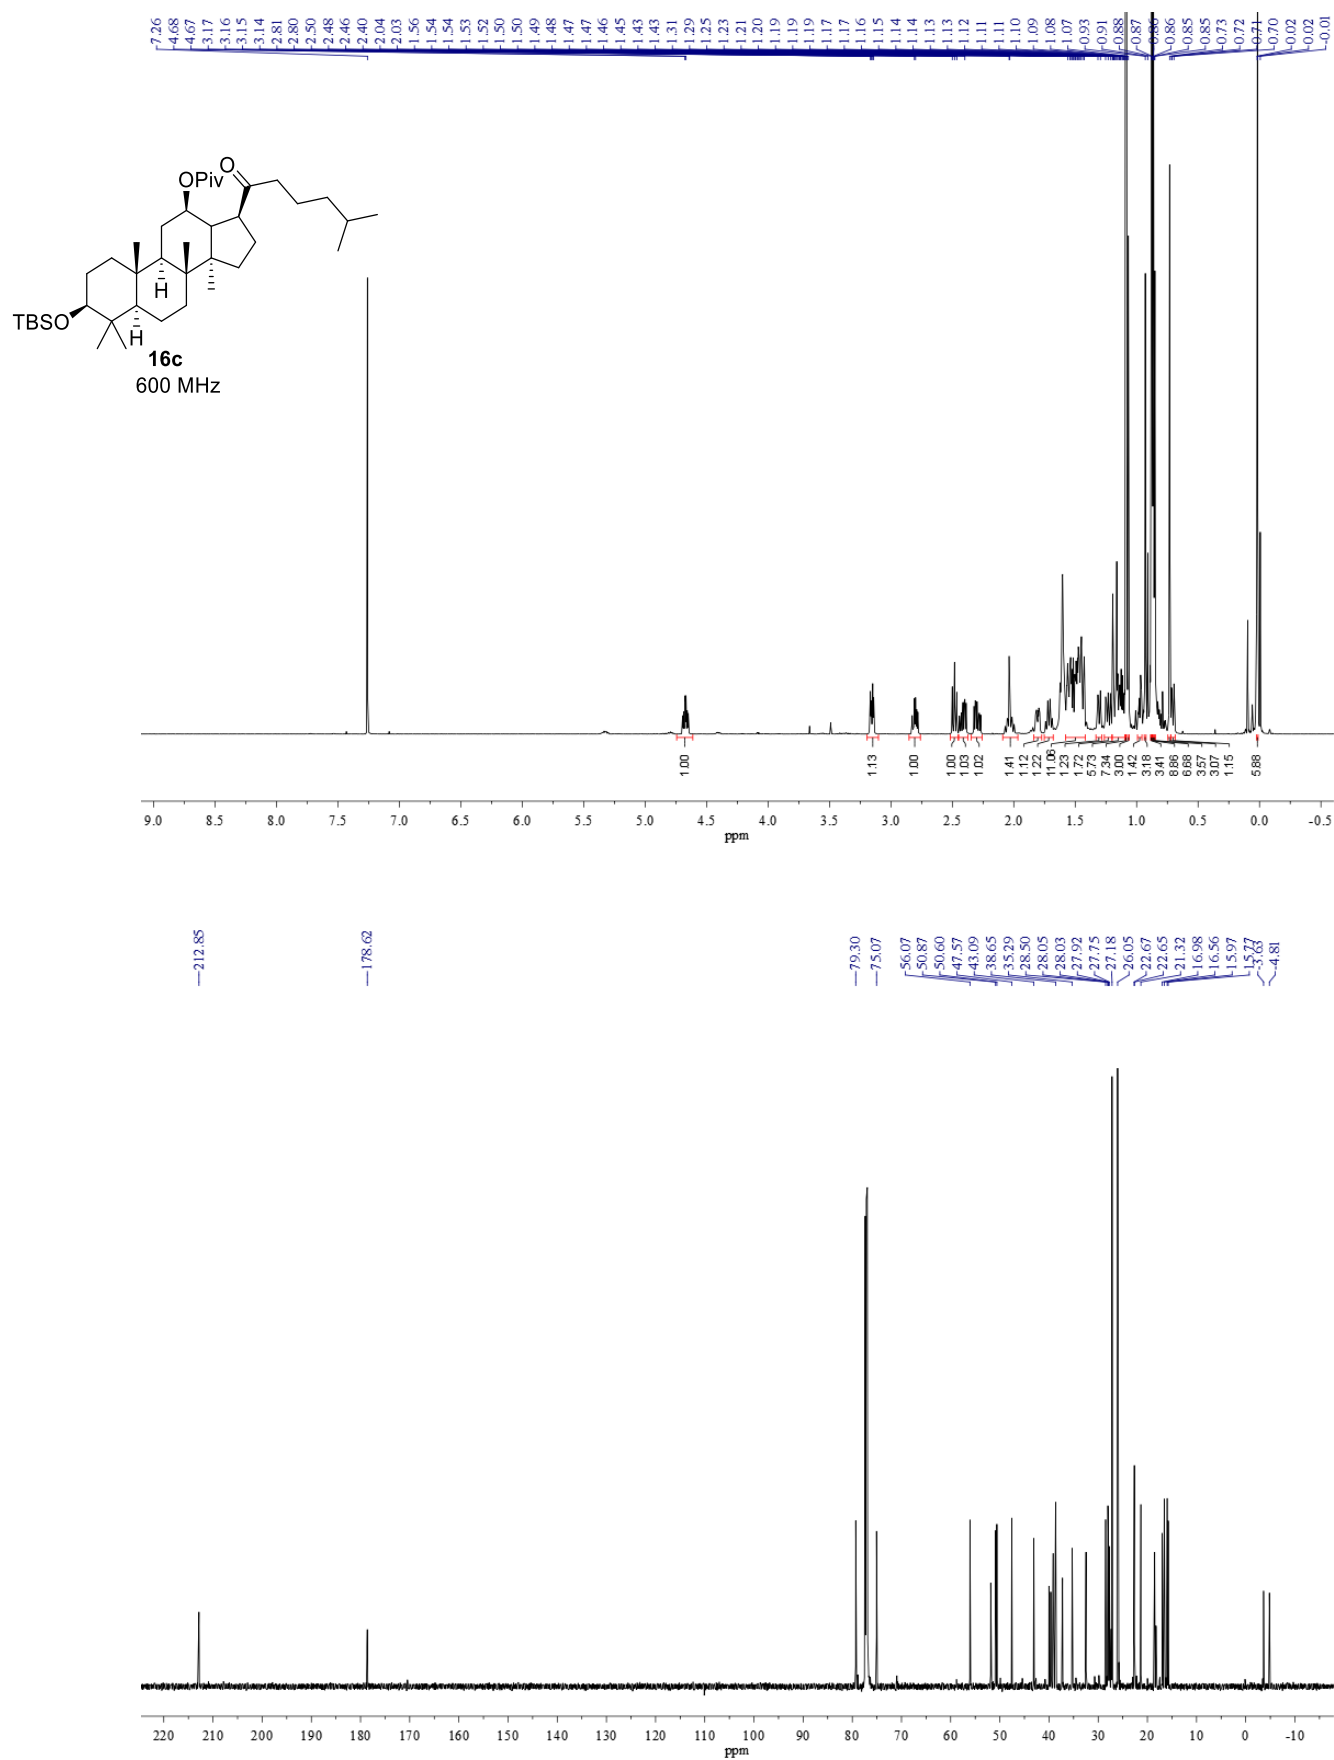



## Supporting Information

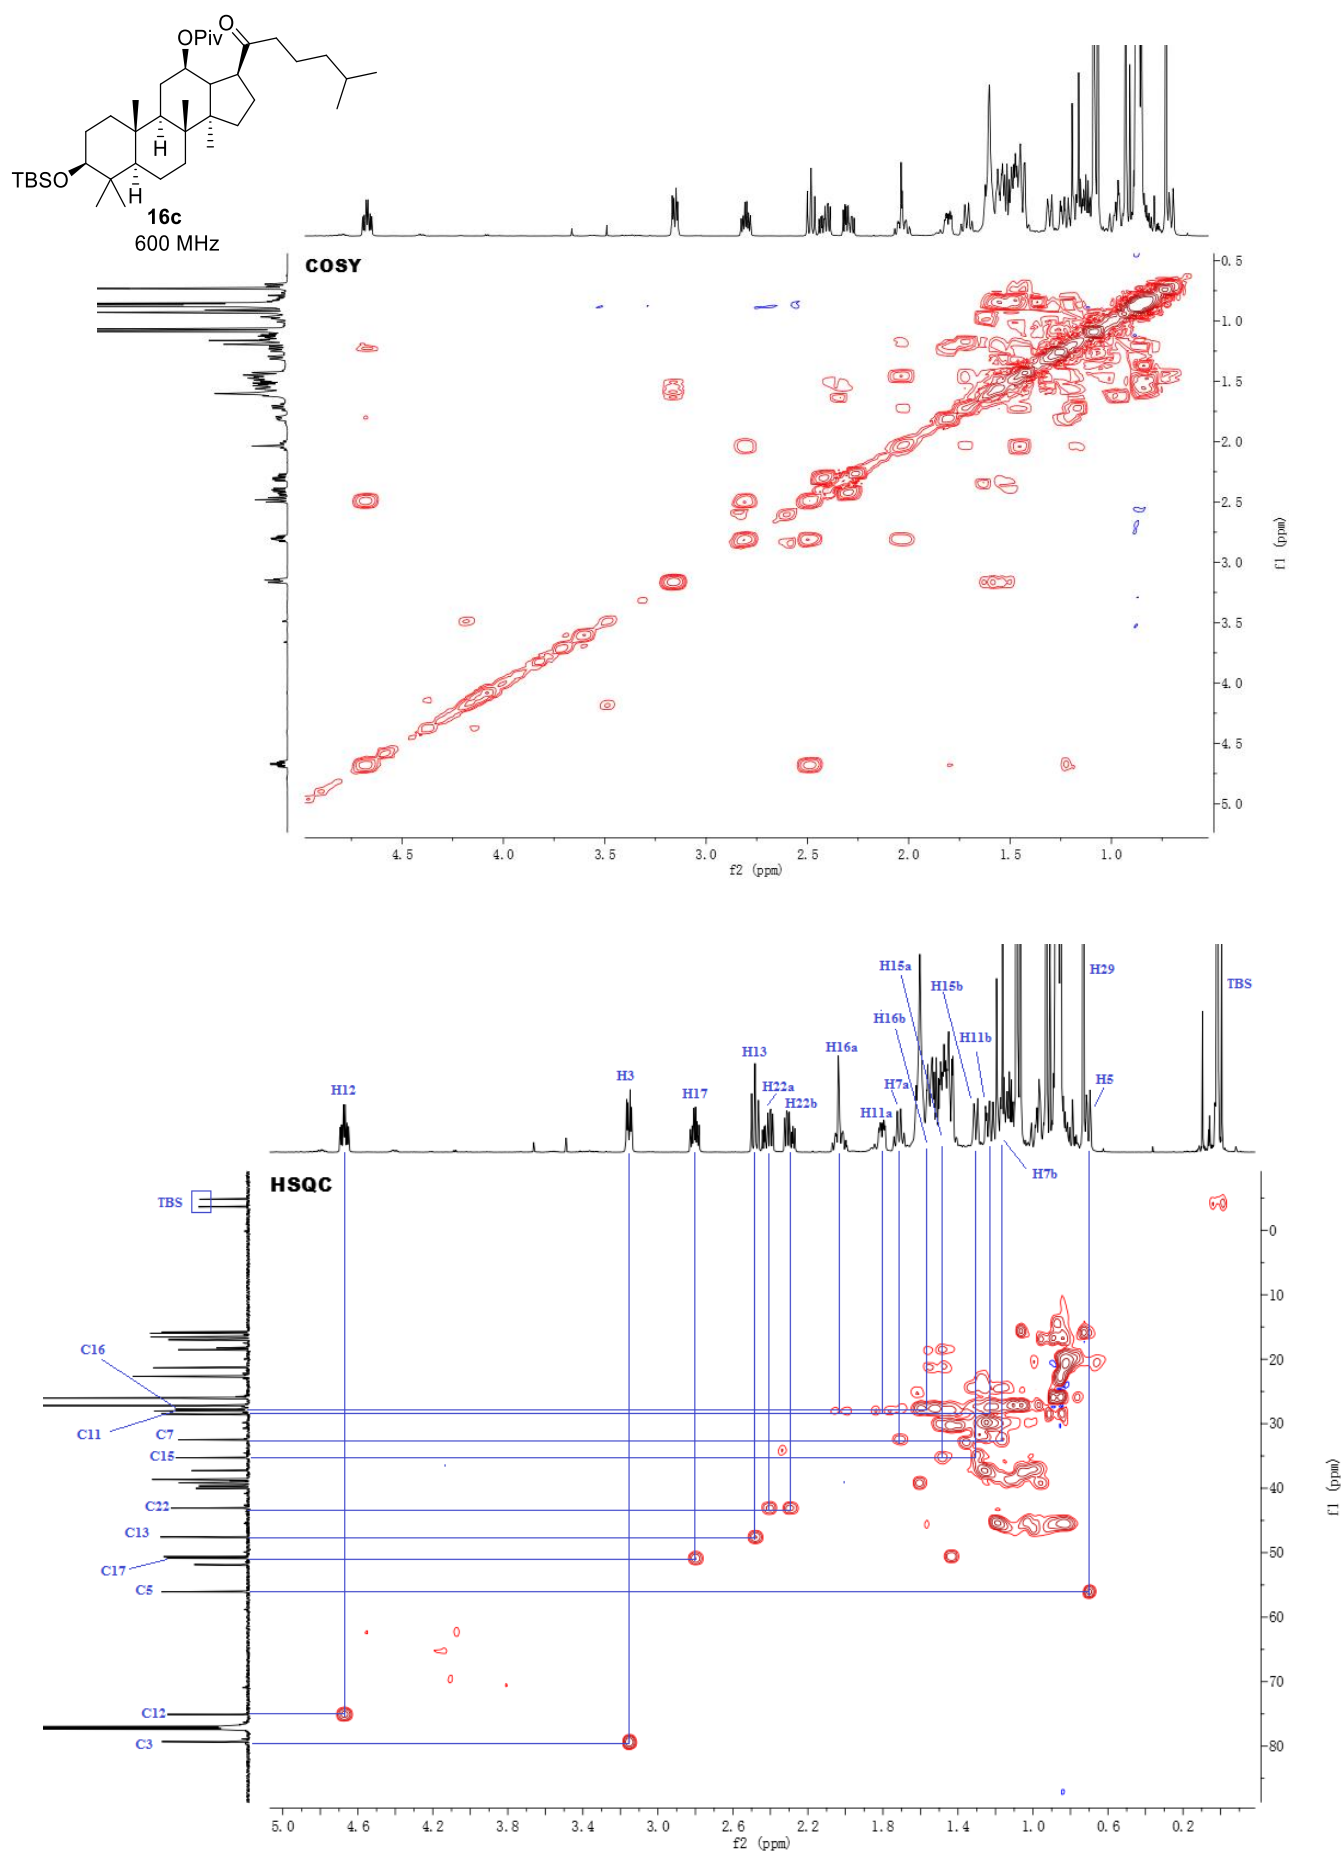

# Supporting Information

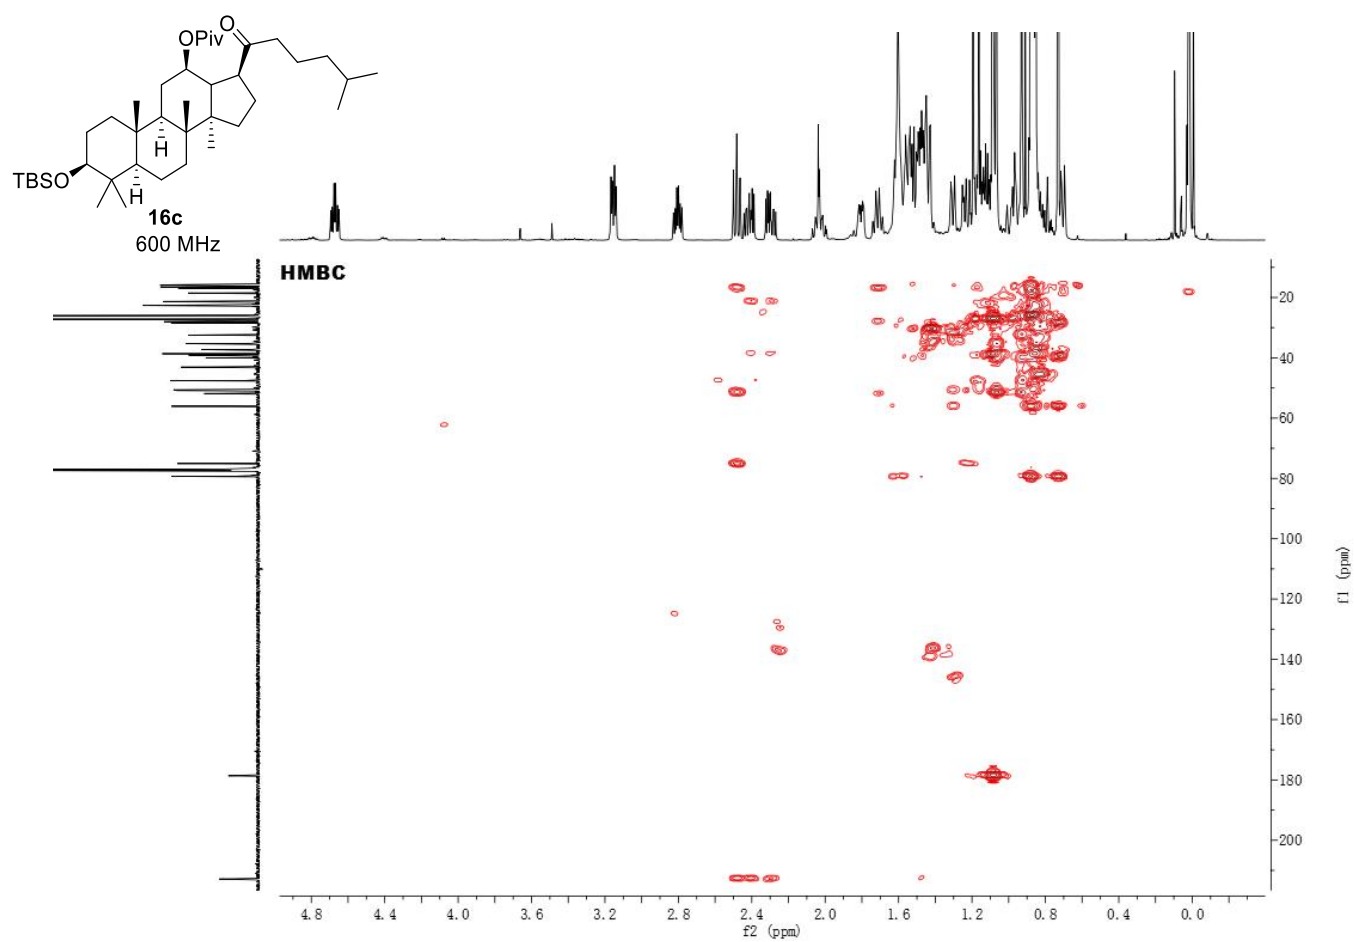

## Supporting Information

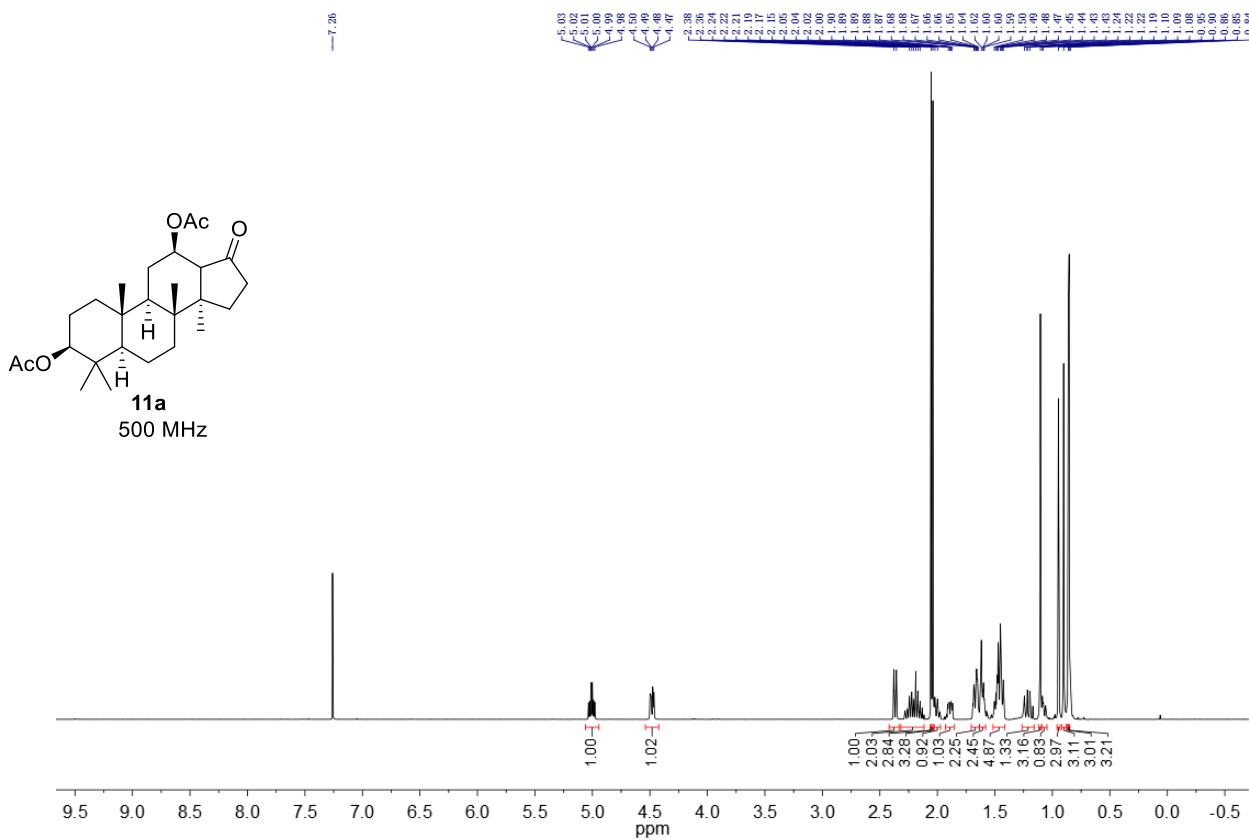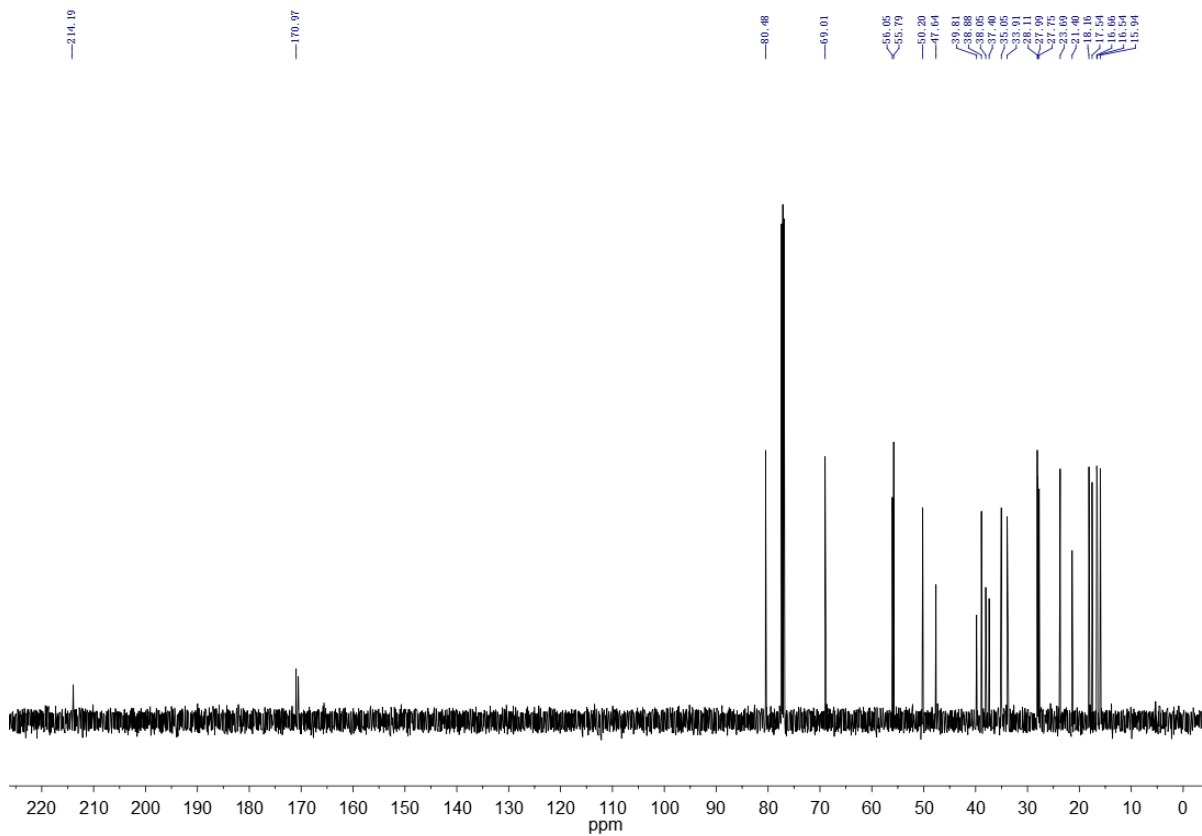

# Supporting Information

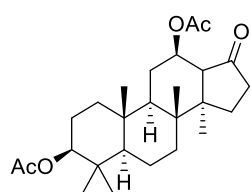

500 MHz

**COSY**

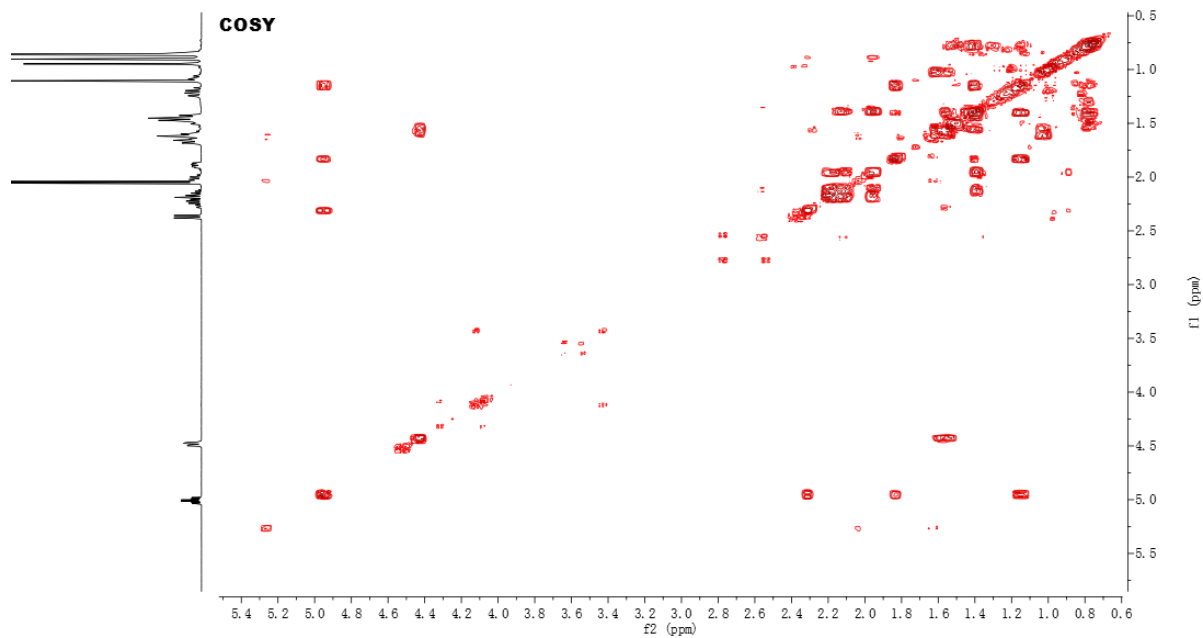

**HSQC**

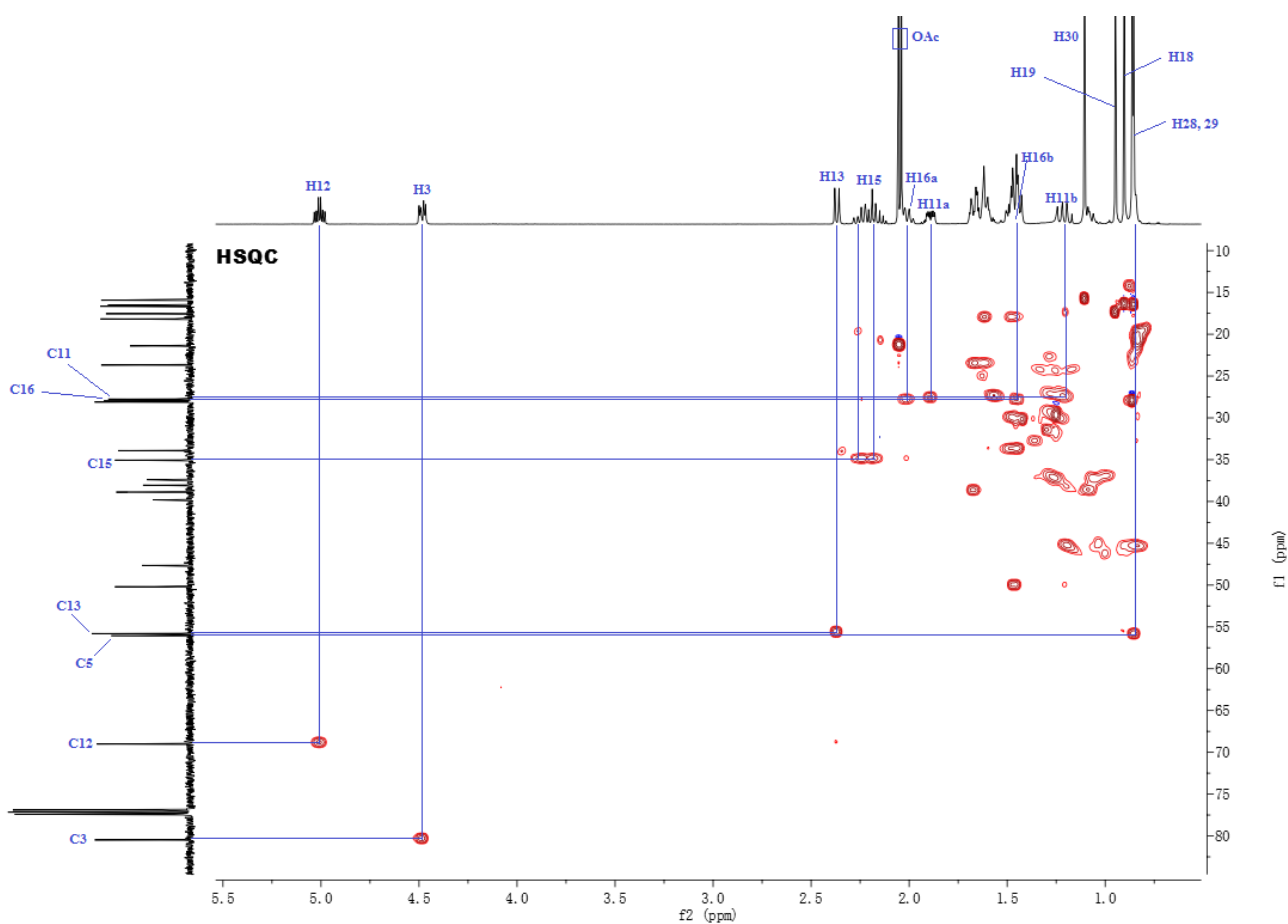

Supporting Information

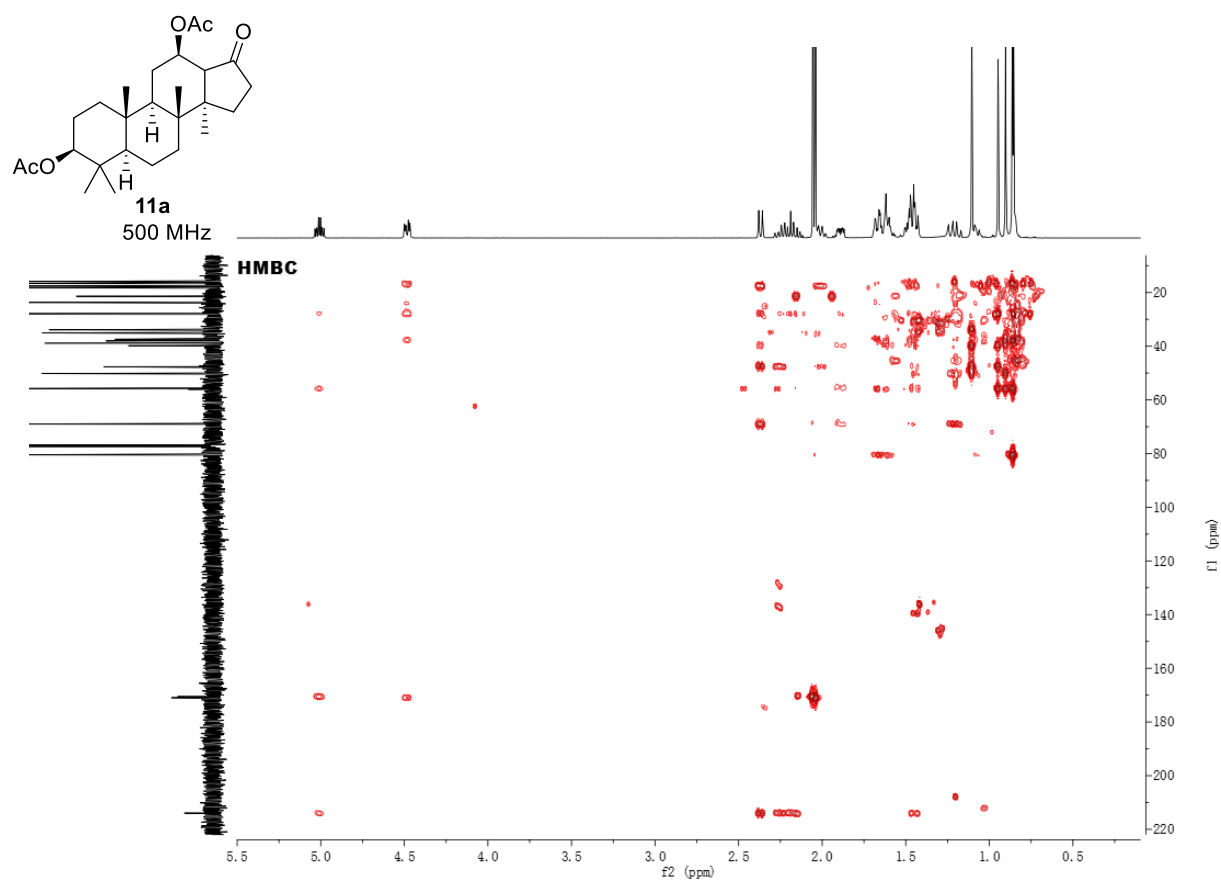

# Supporting Information

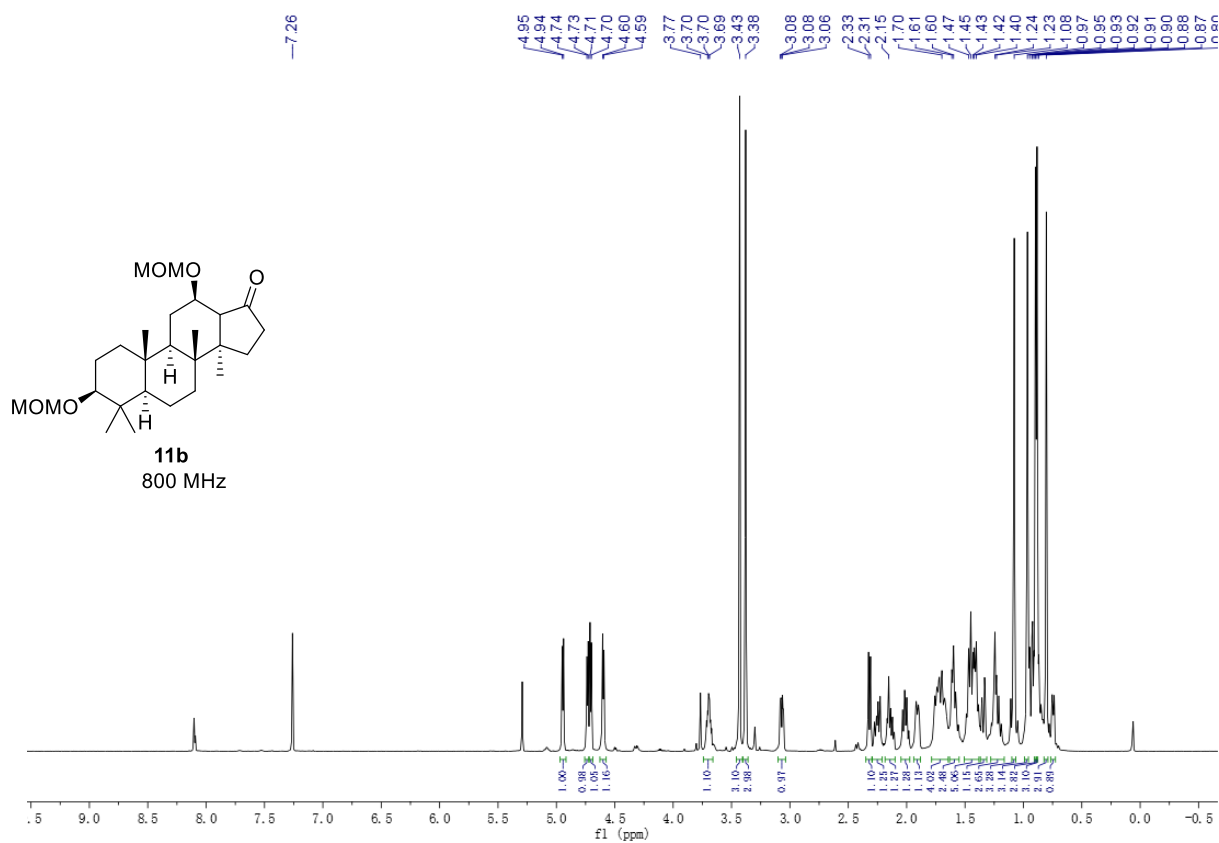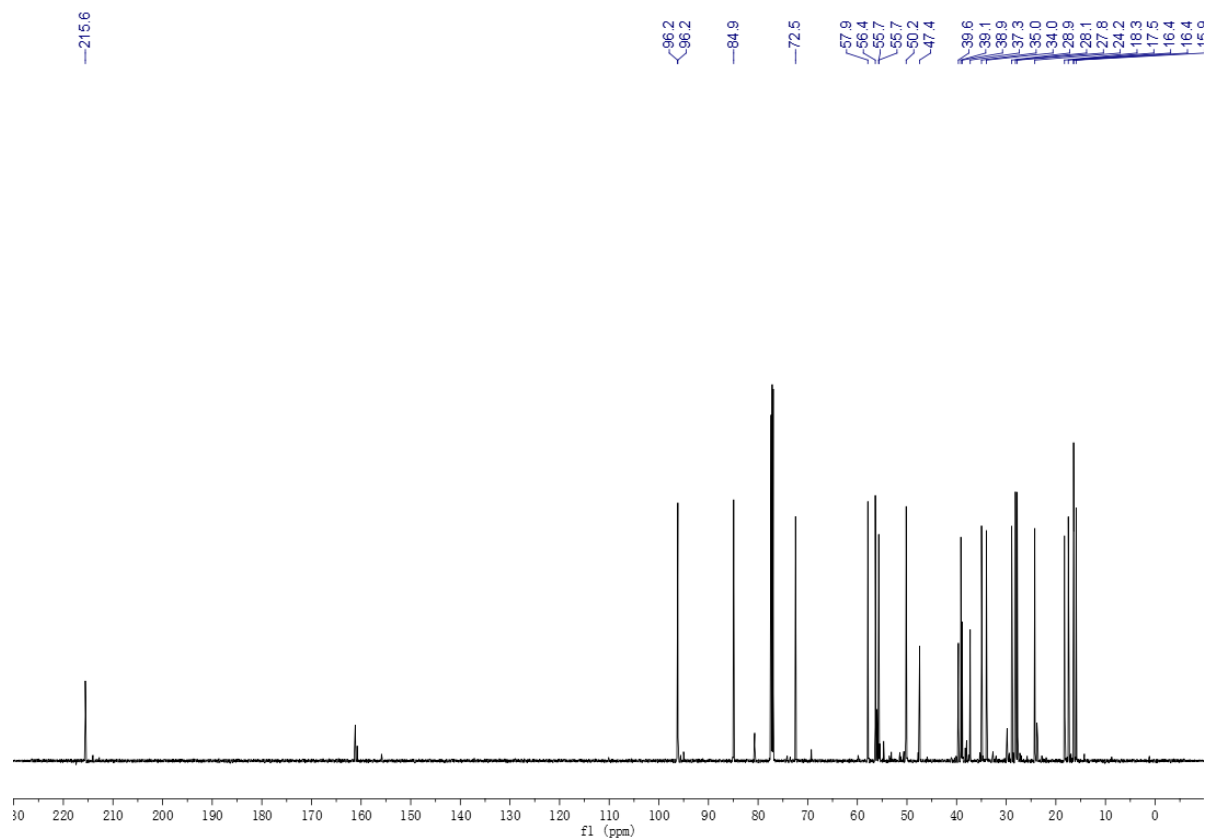

# Supporting Information

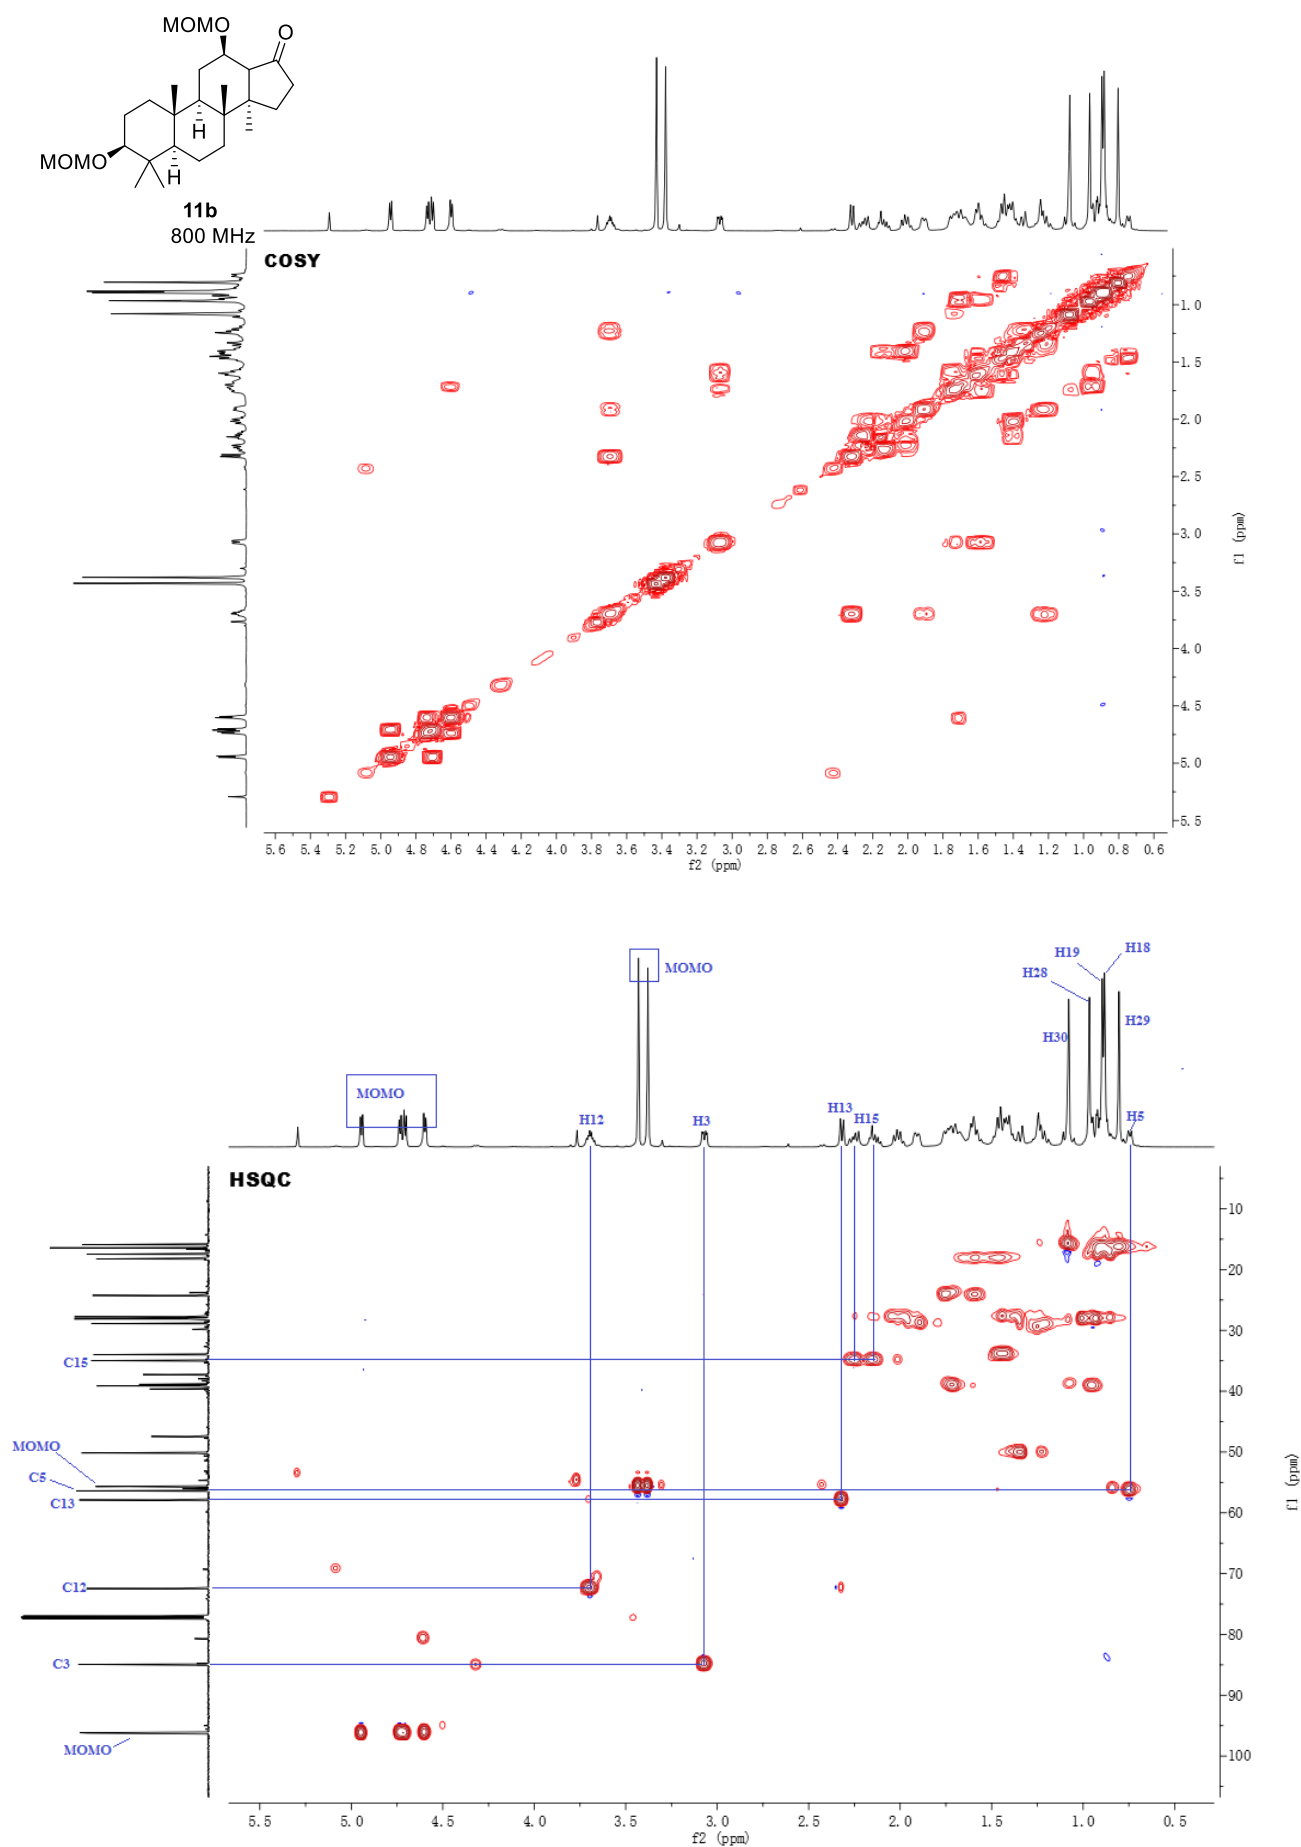

# Supporting Information

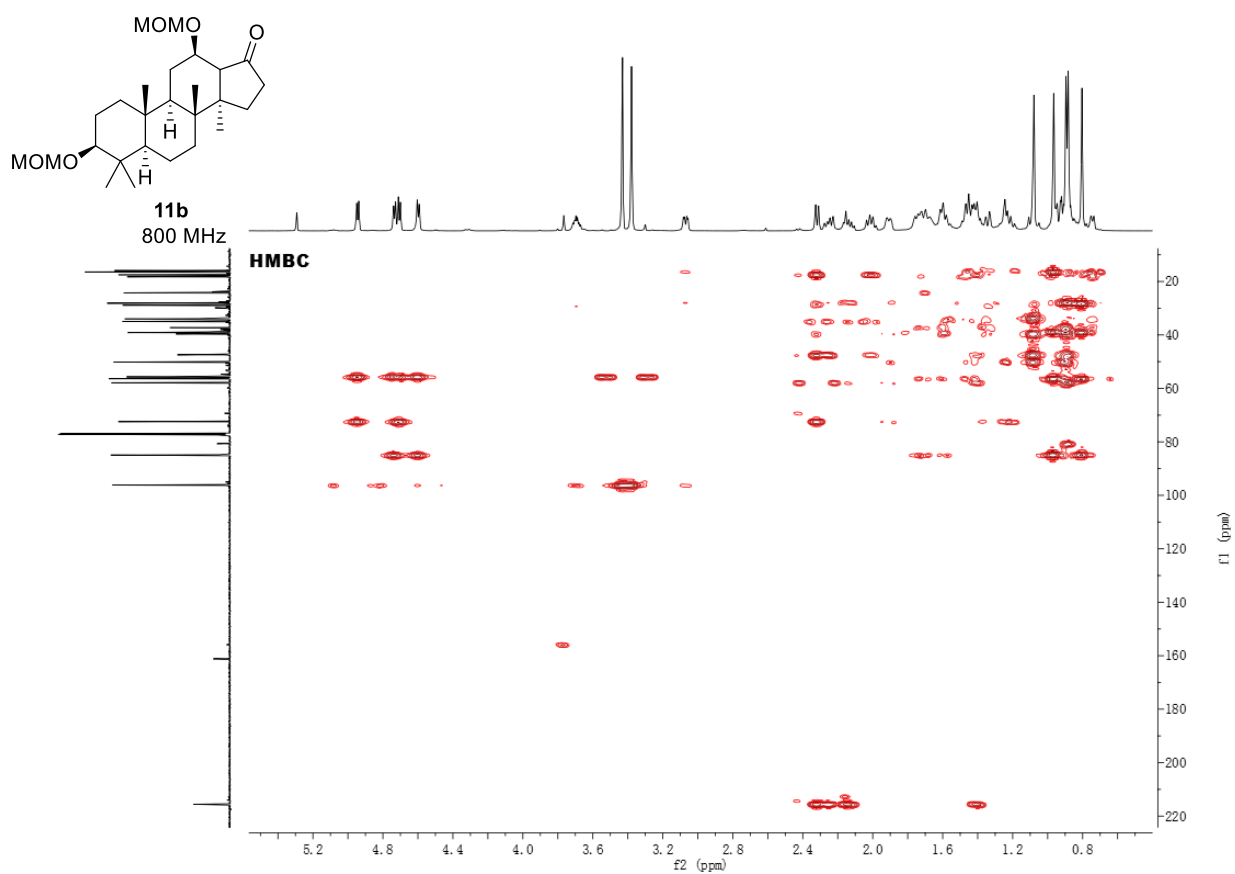



# Supporting Information

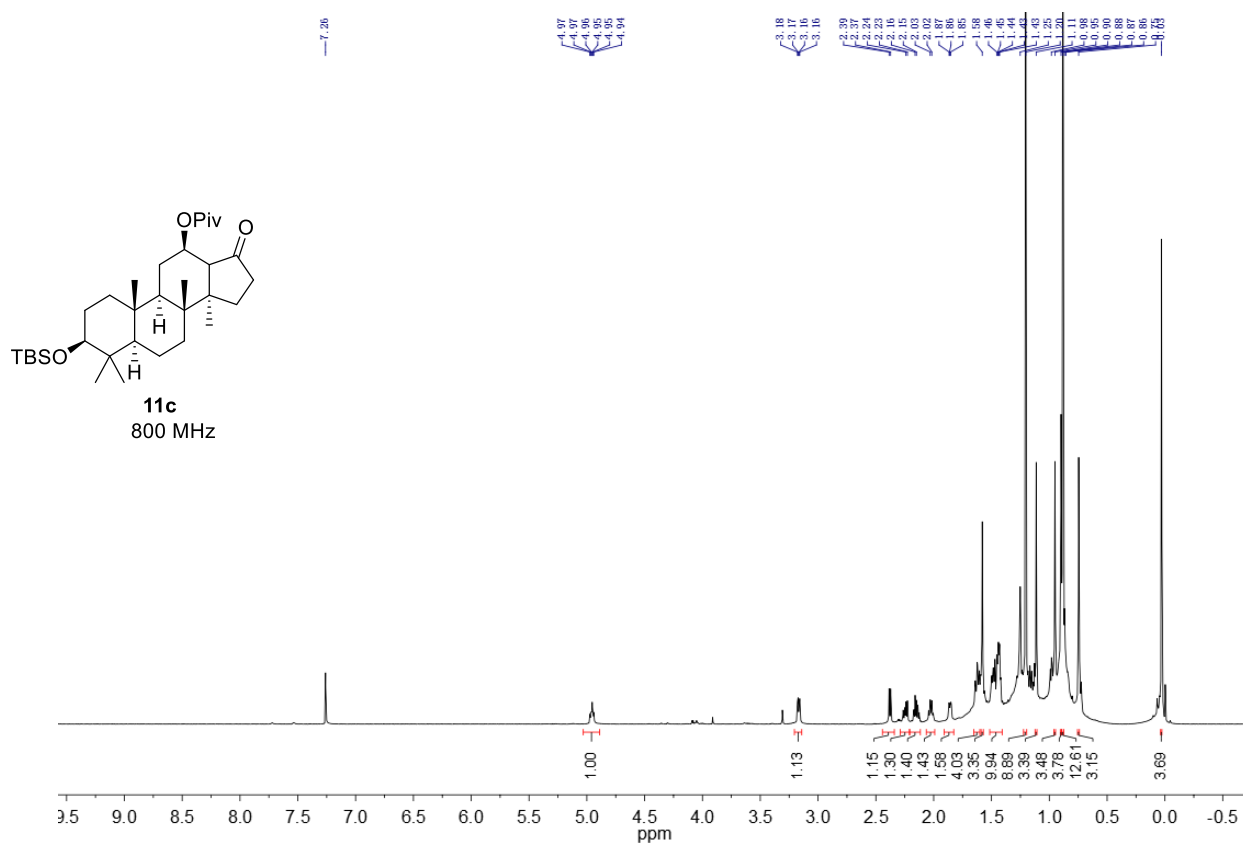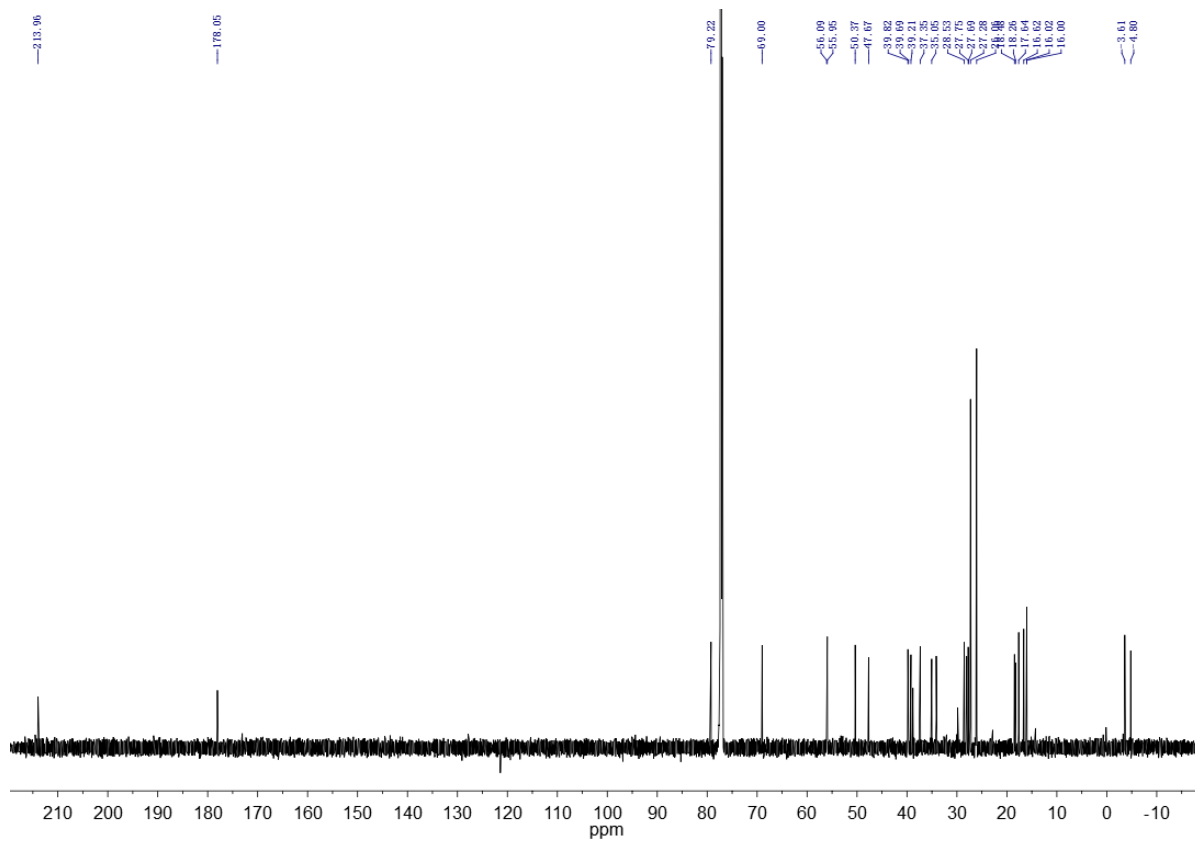

# Supporting Information

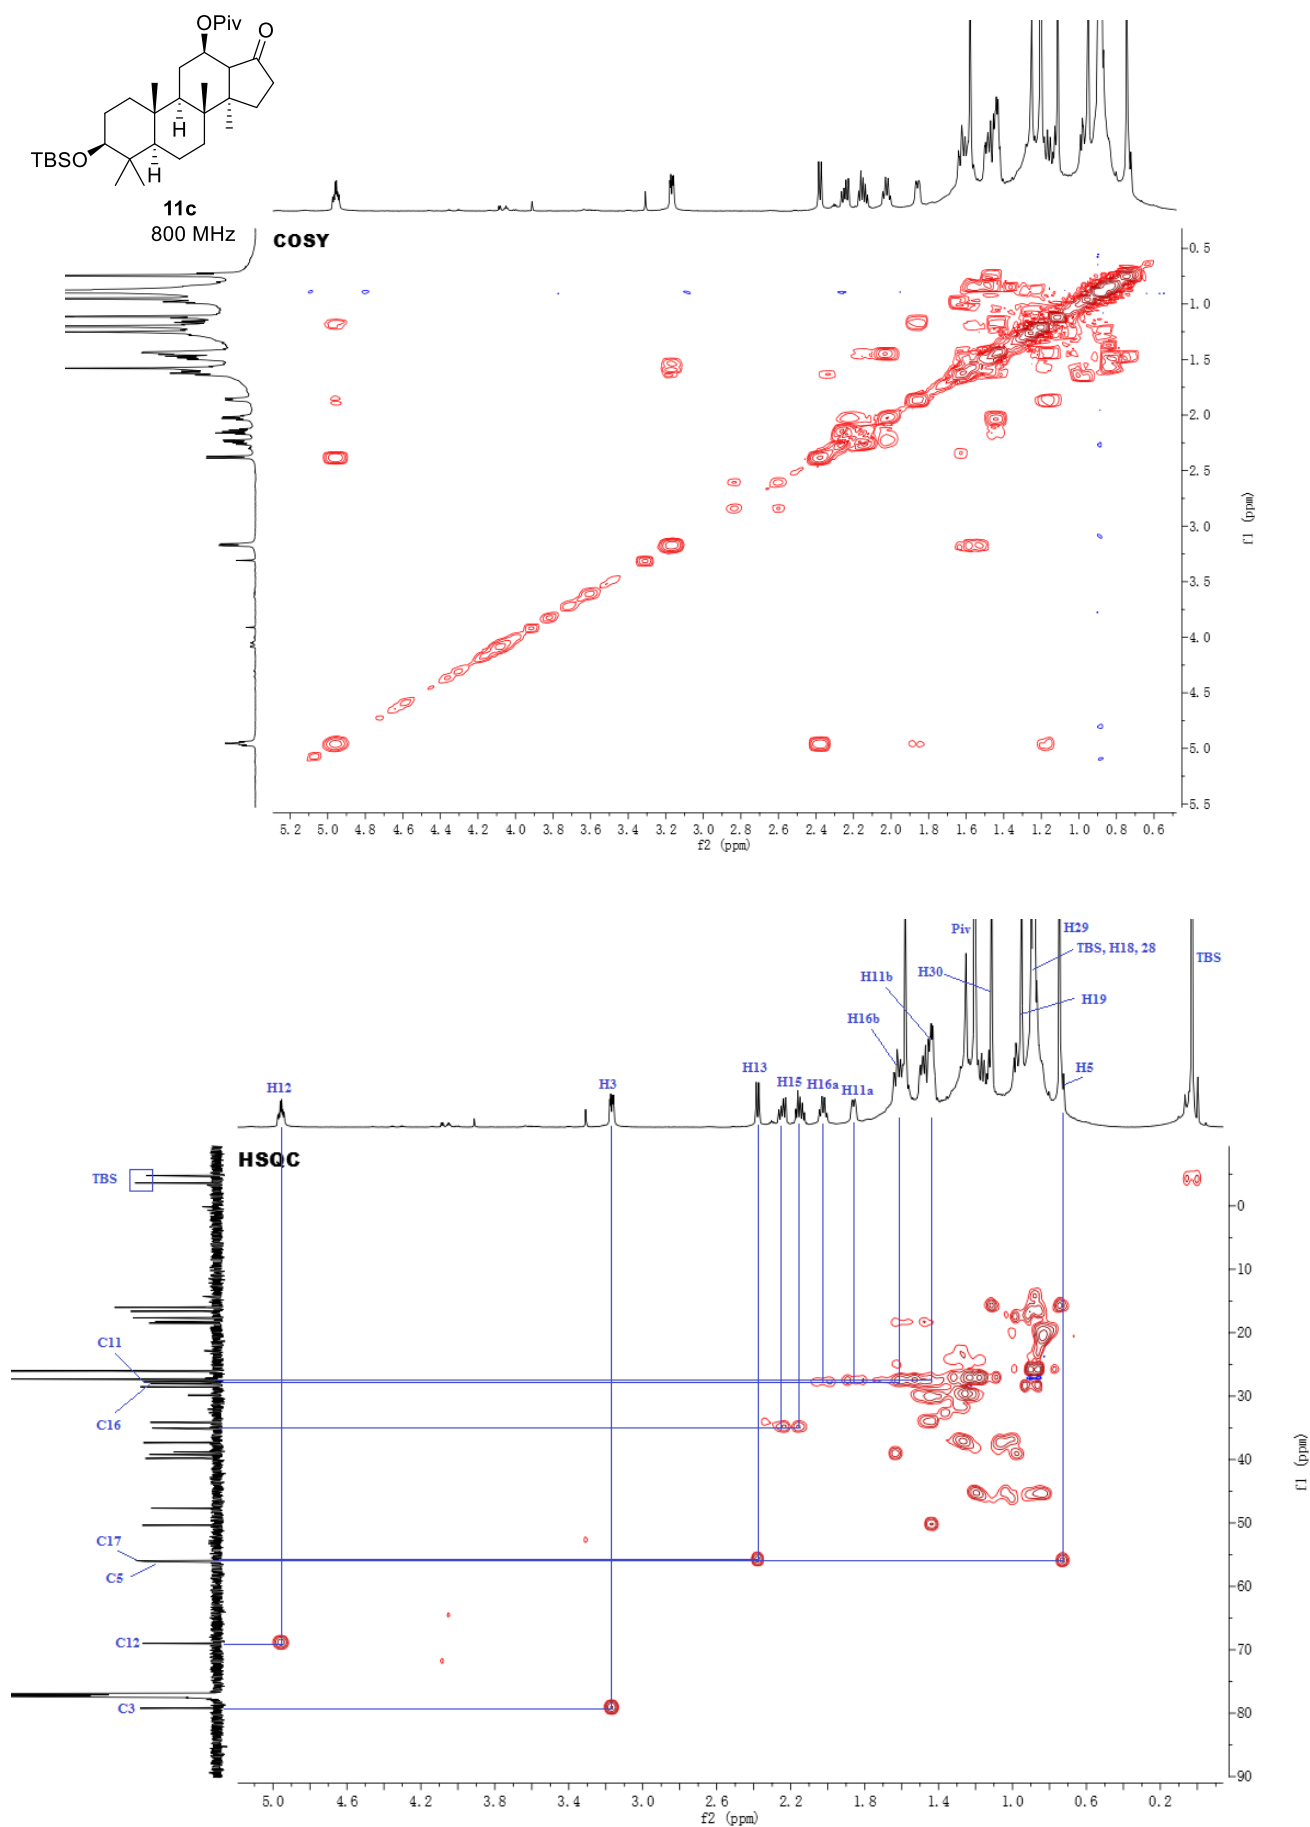

Supporting Information

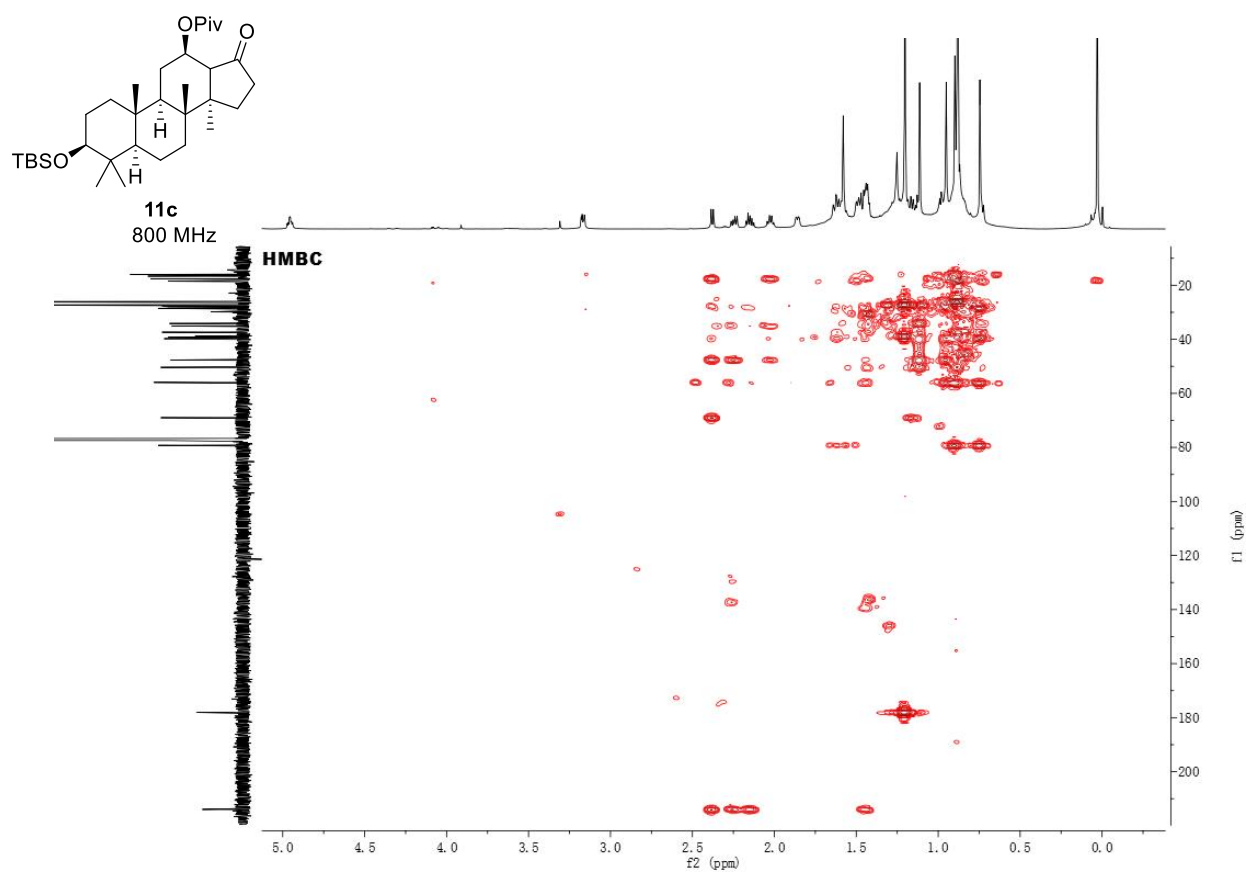

# Supporting Information

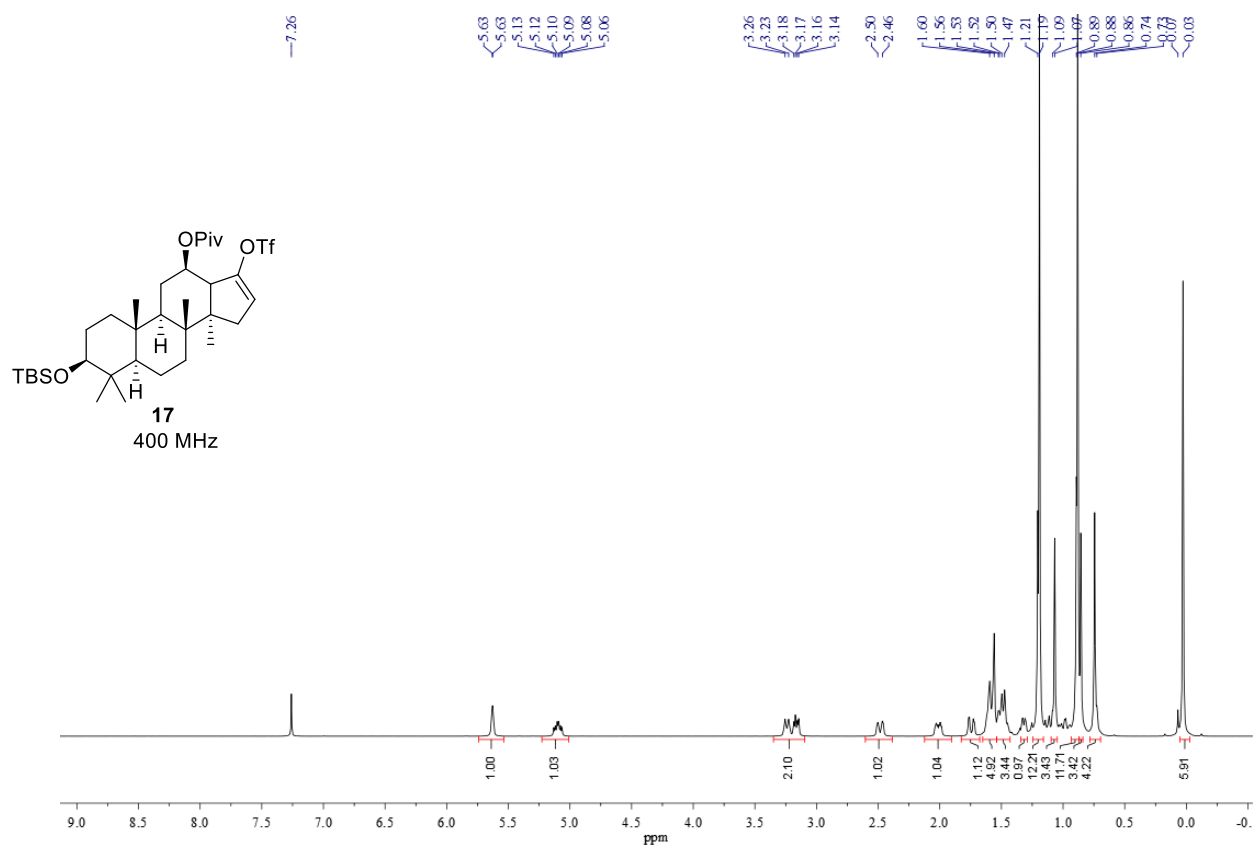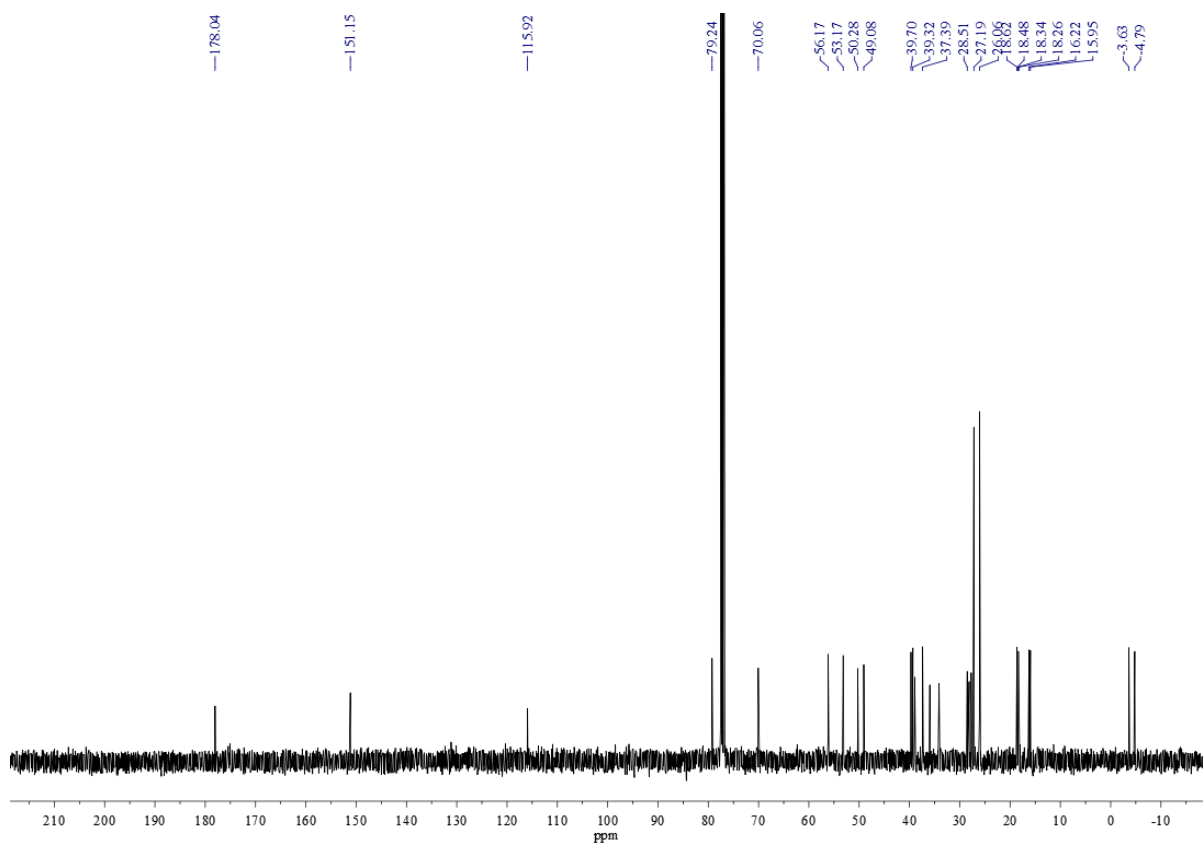

# Supporting Information

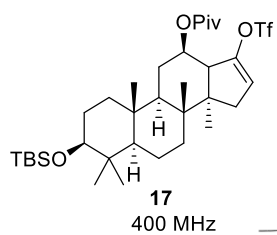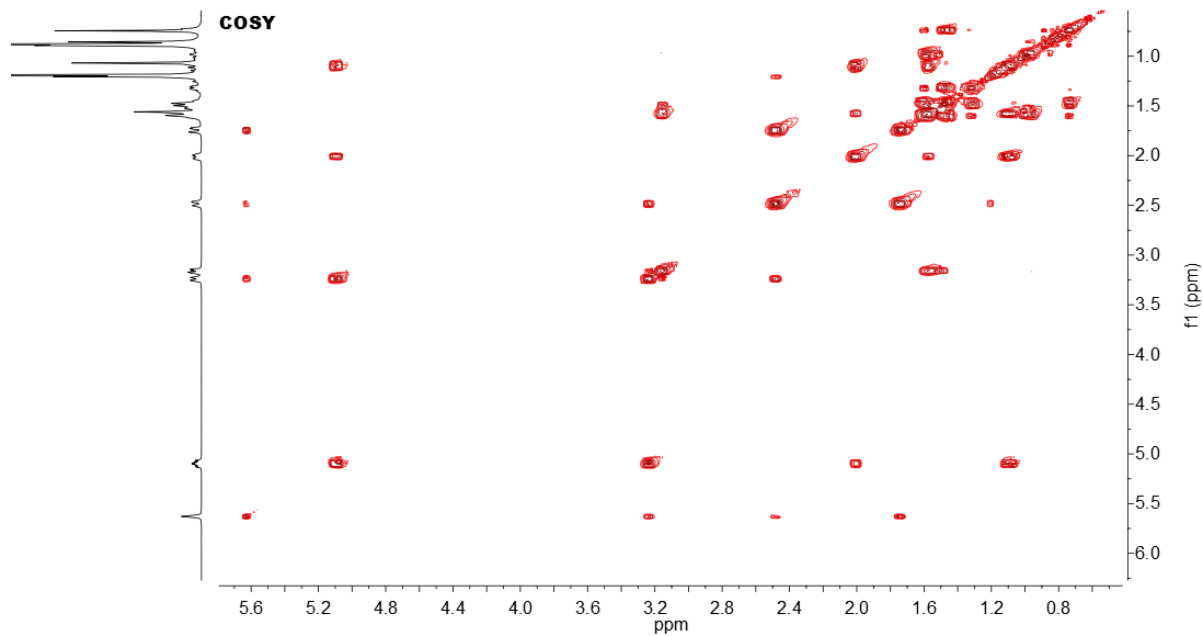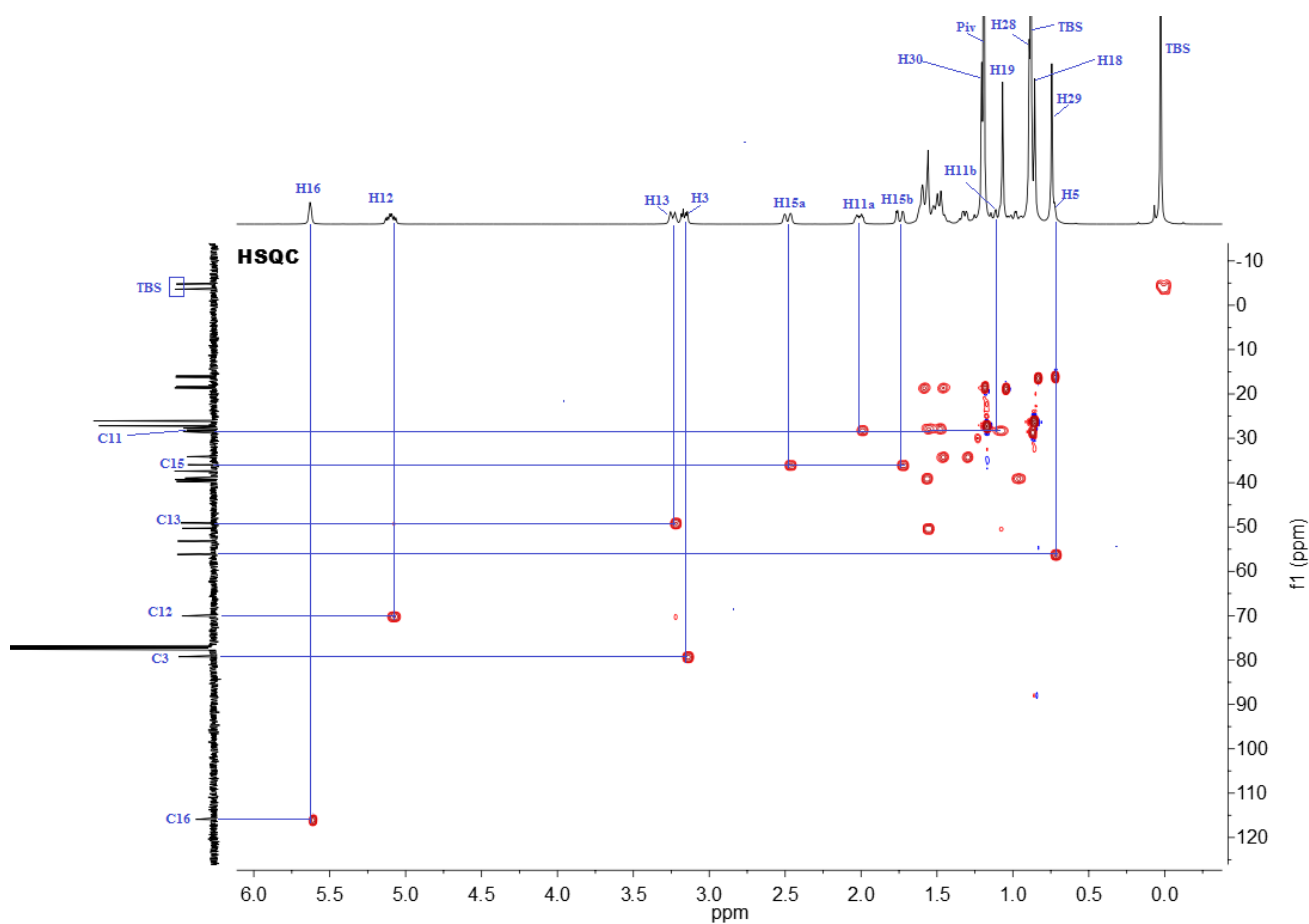

Supporting Information

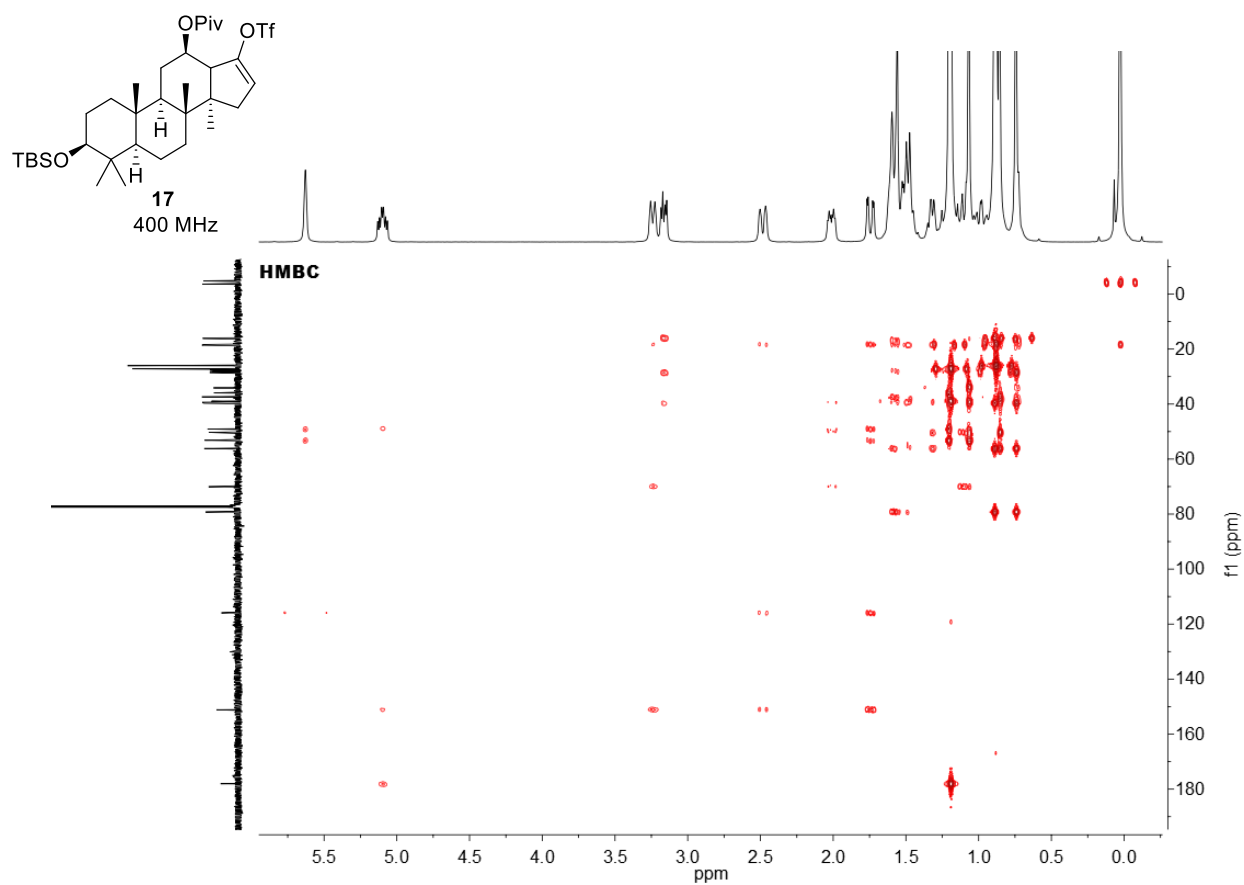

# Supporting Information

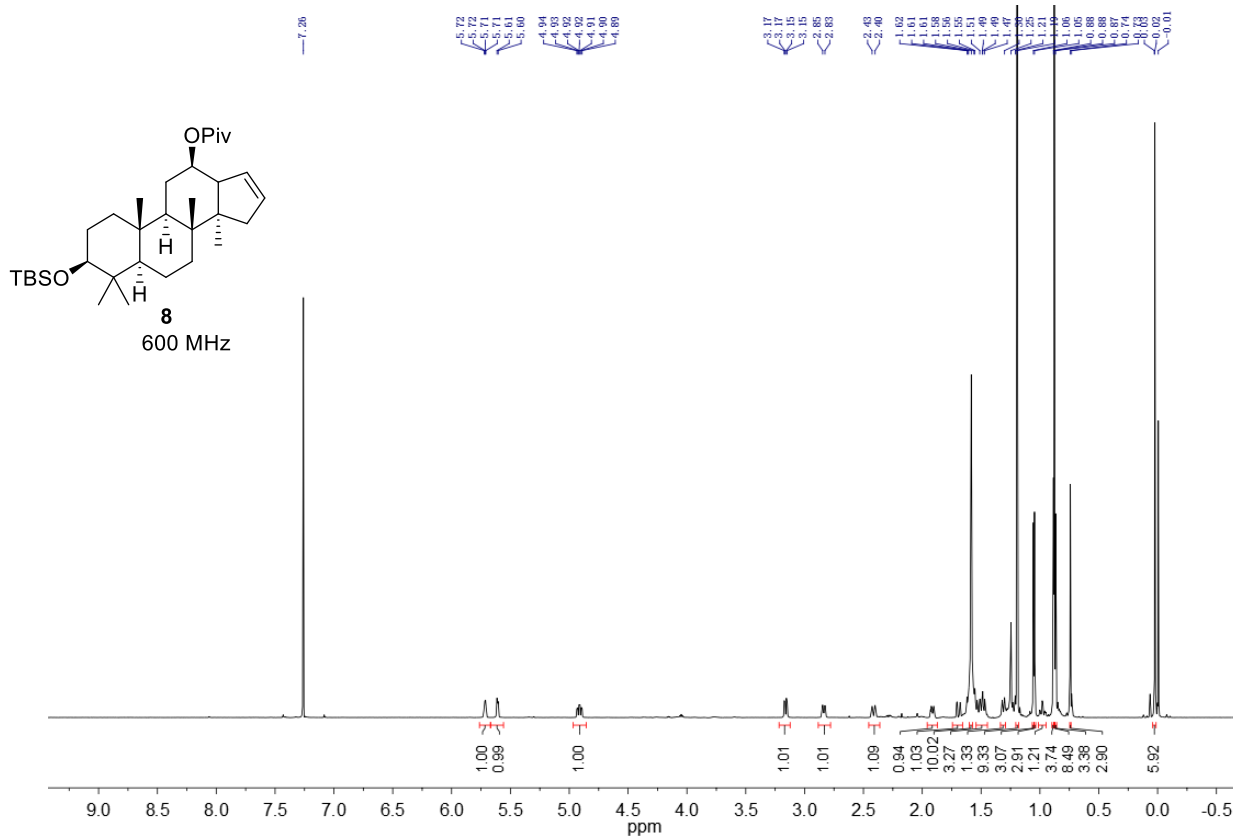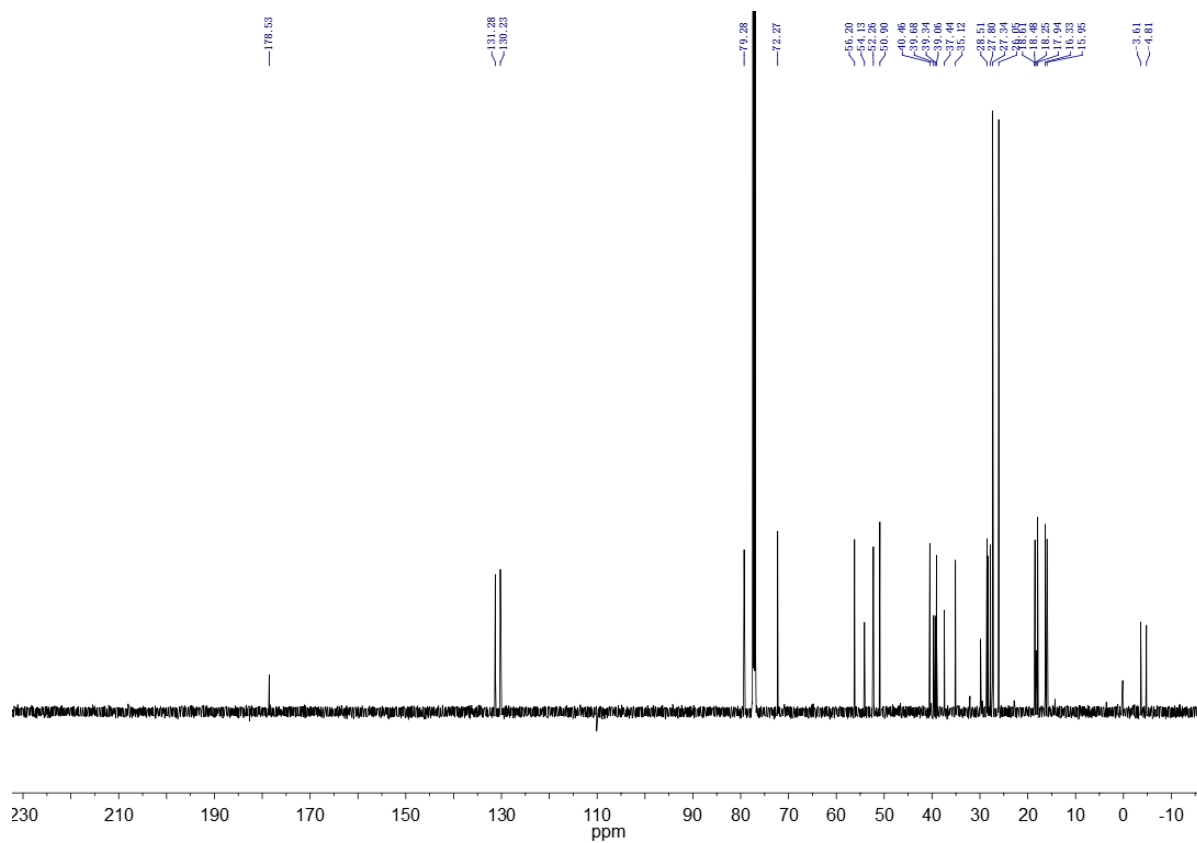

# Supporting Information

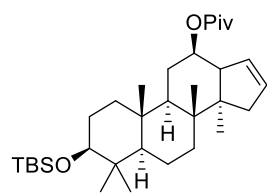

**8**  
600 MHz

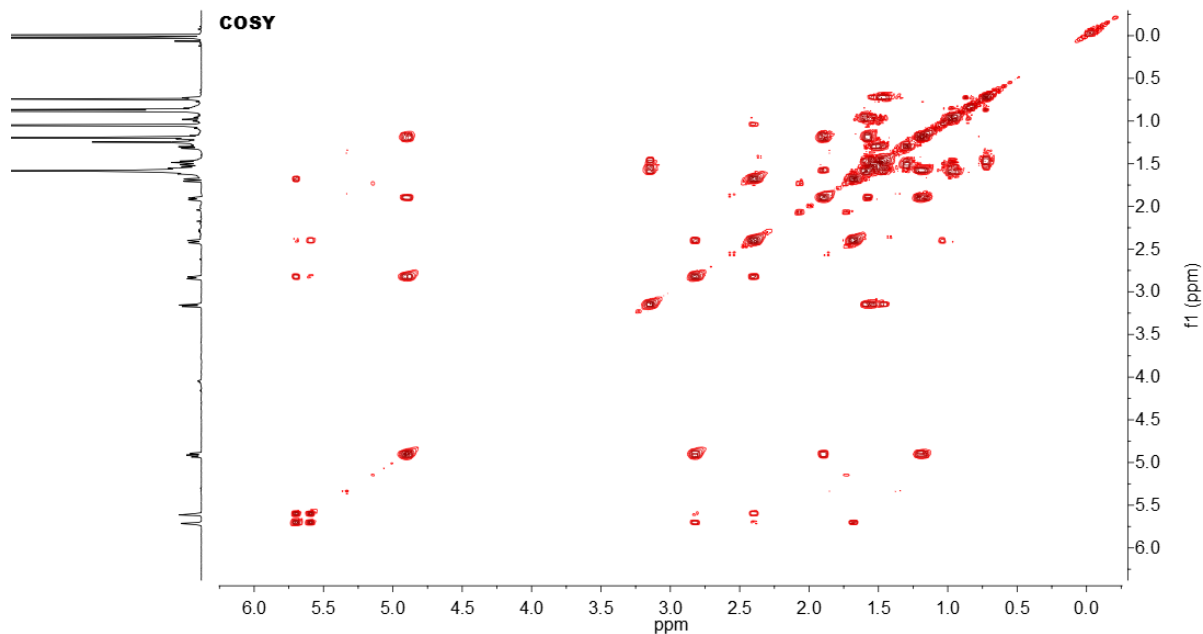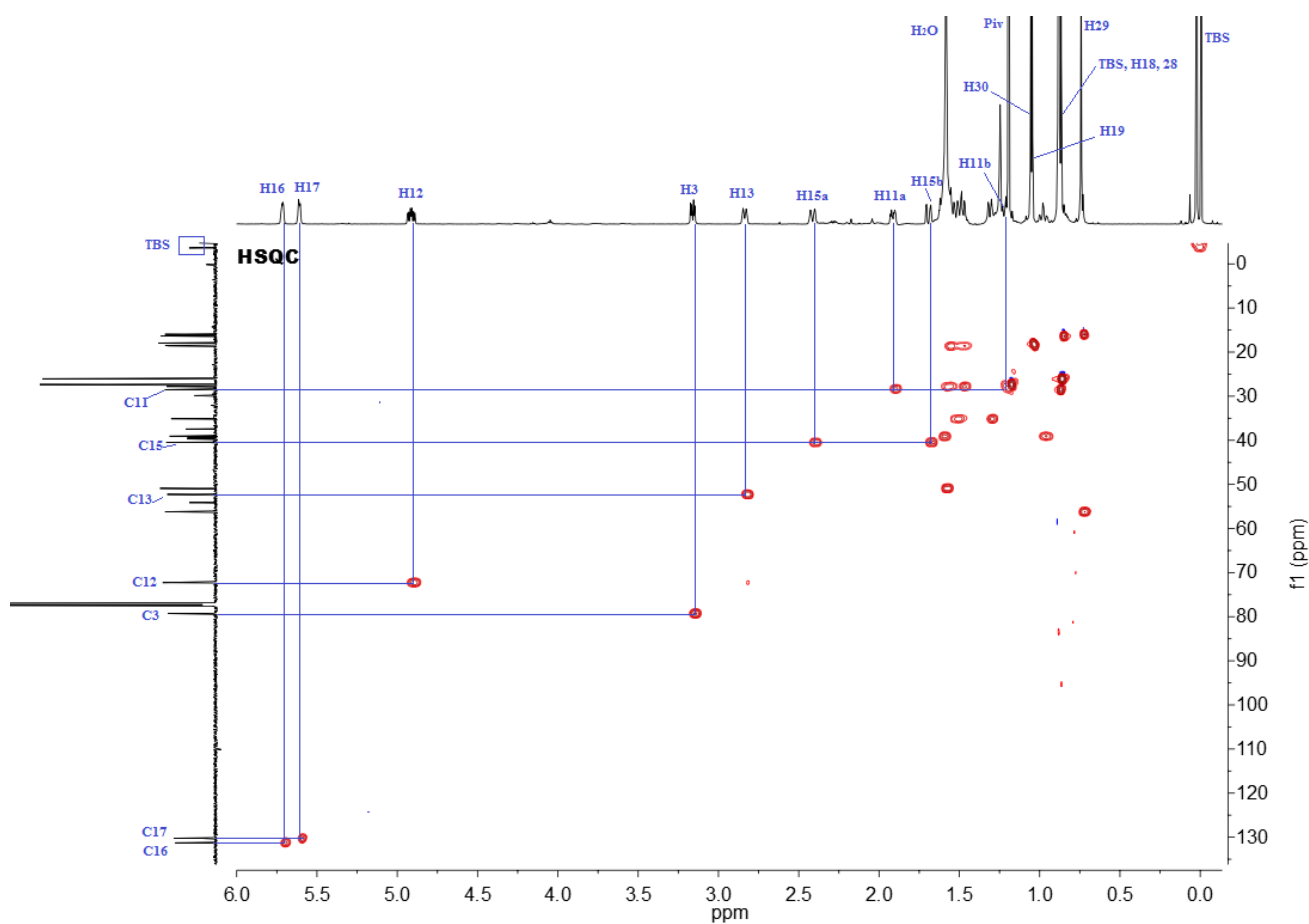



# Supporting Information

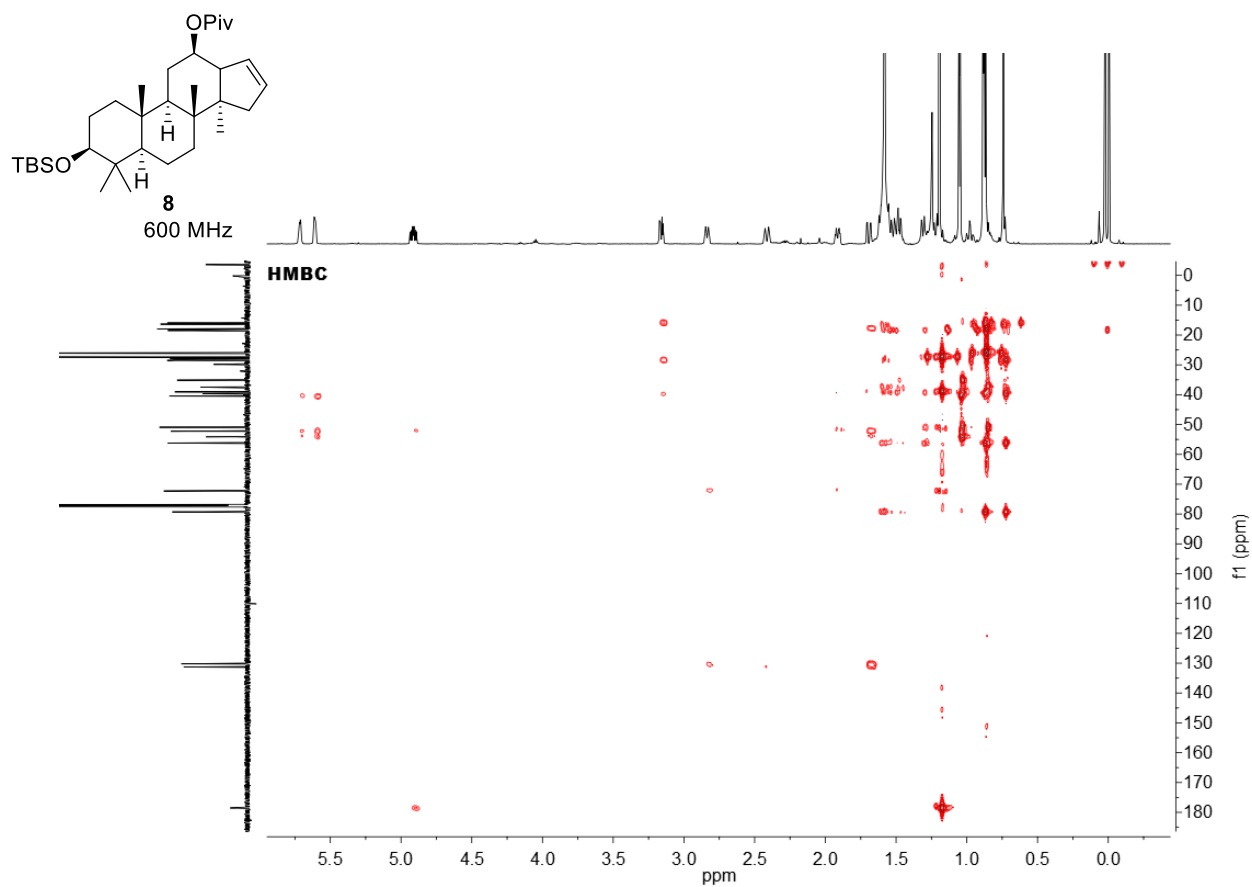

## S54

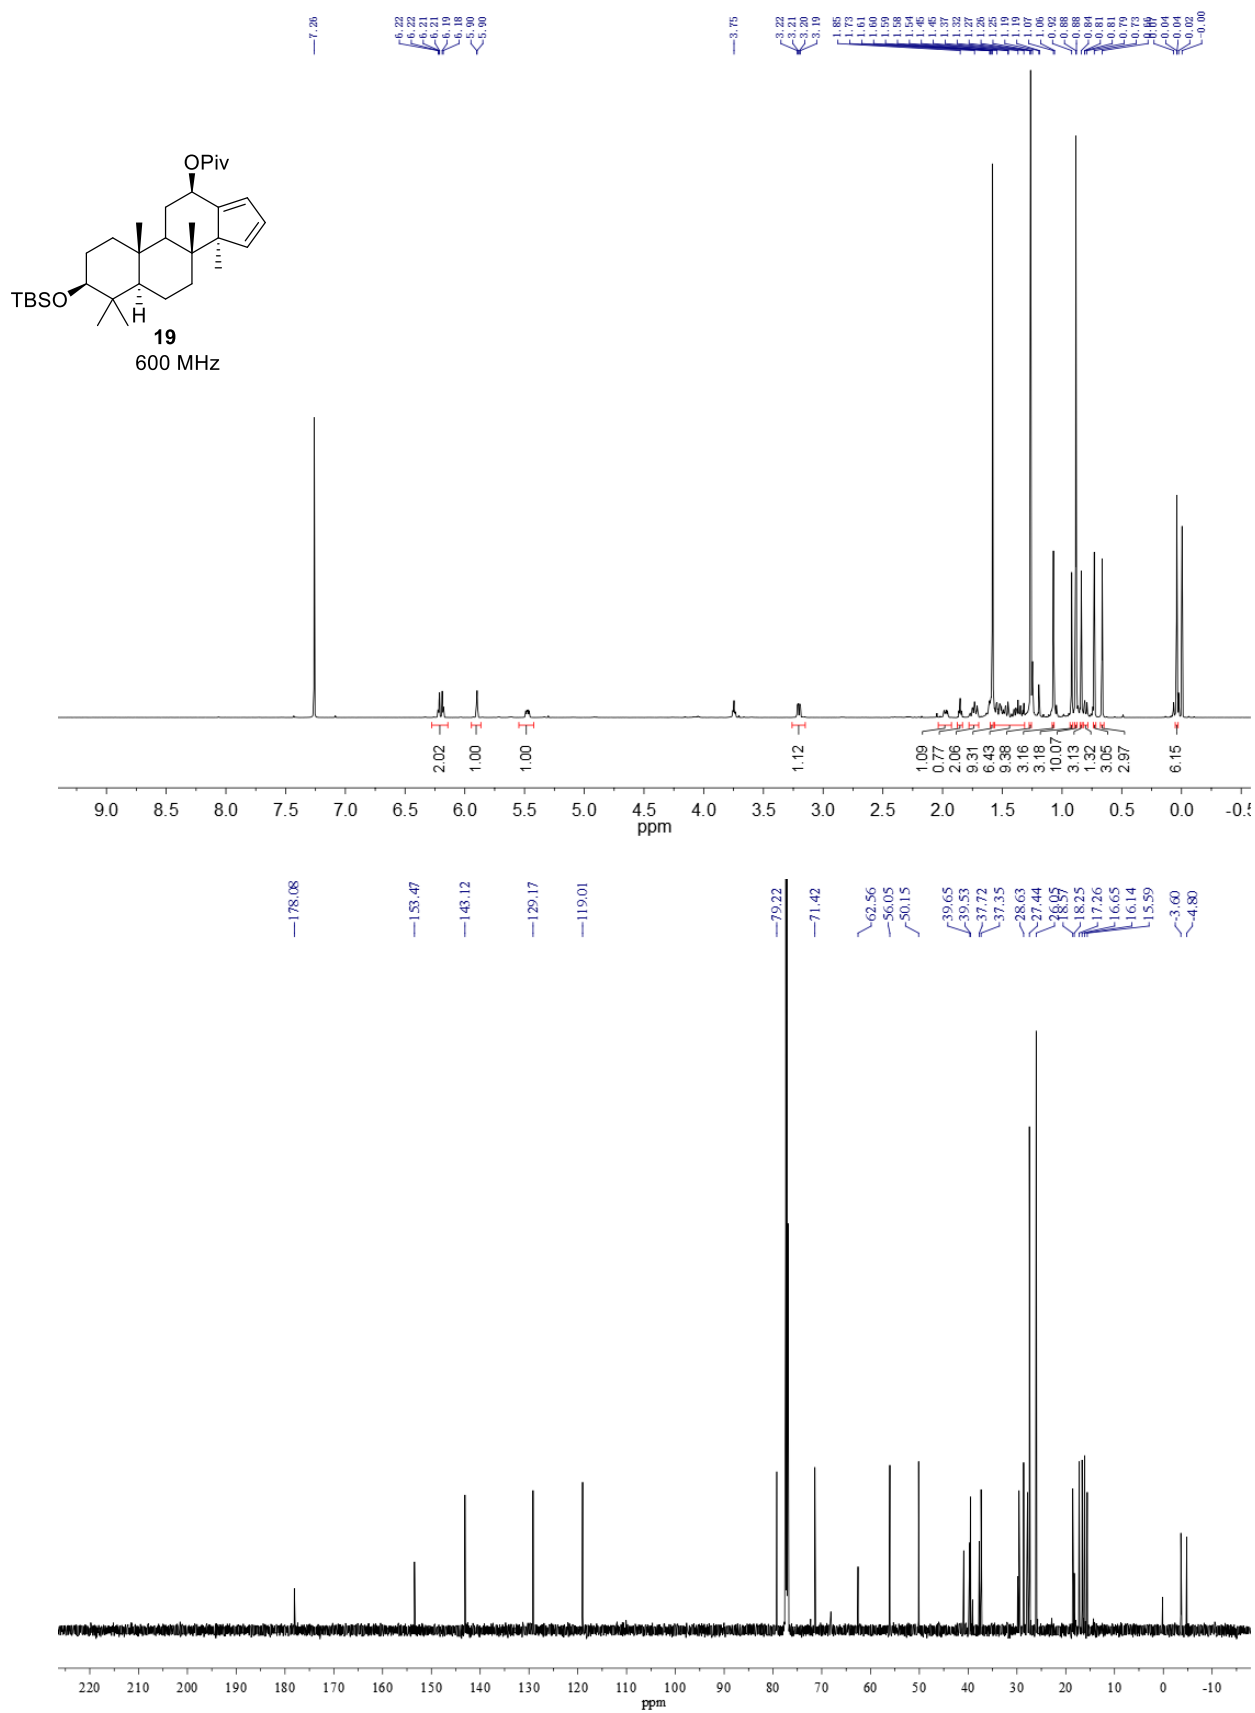

# Supporting Information

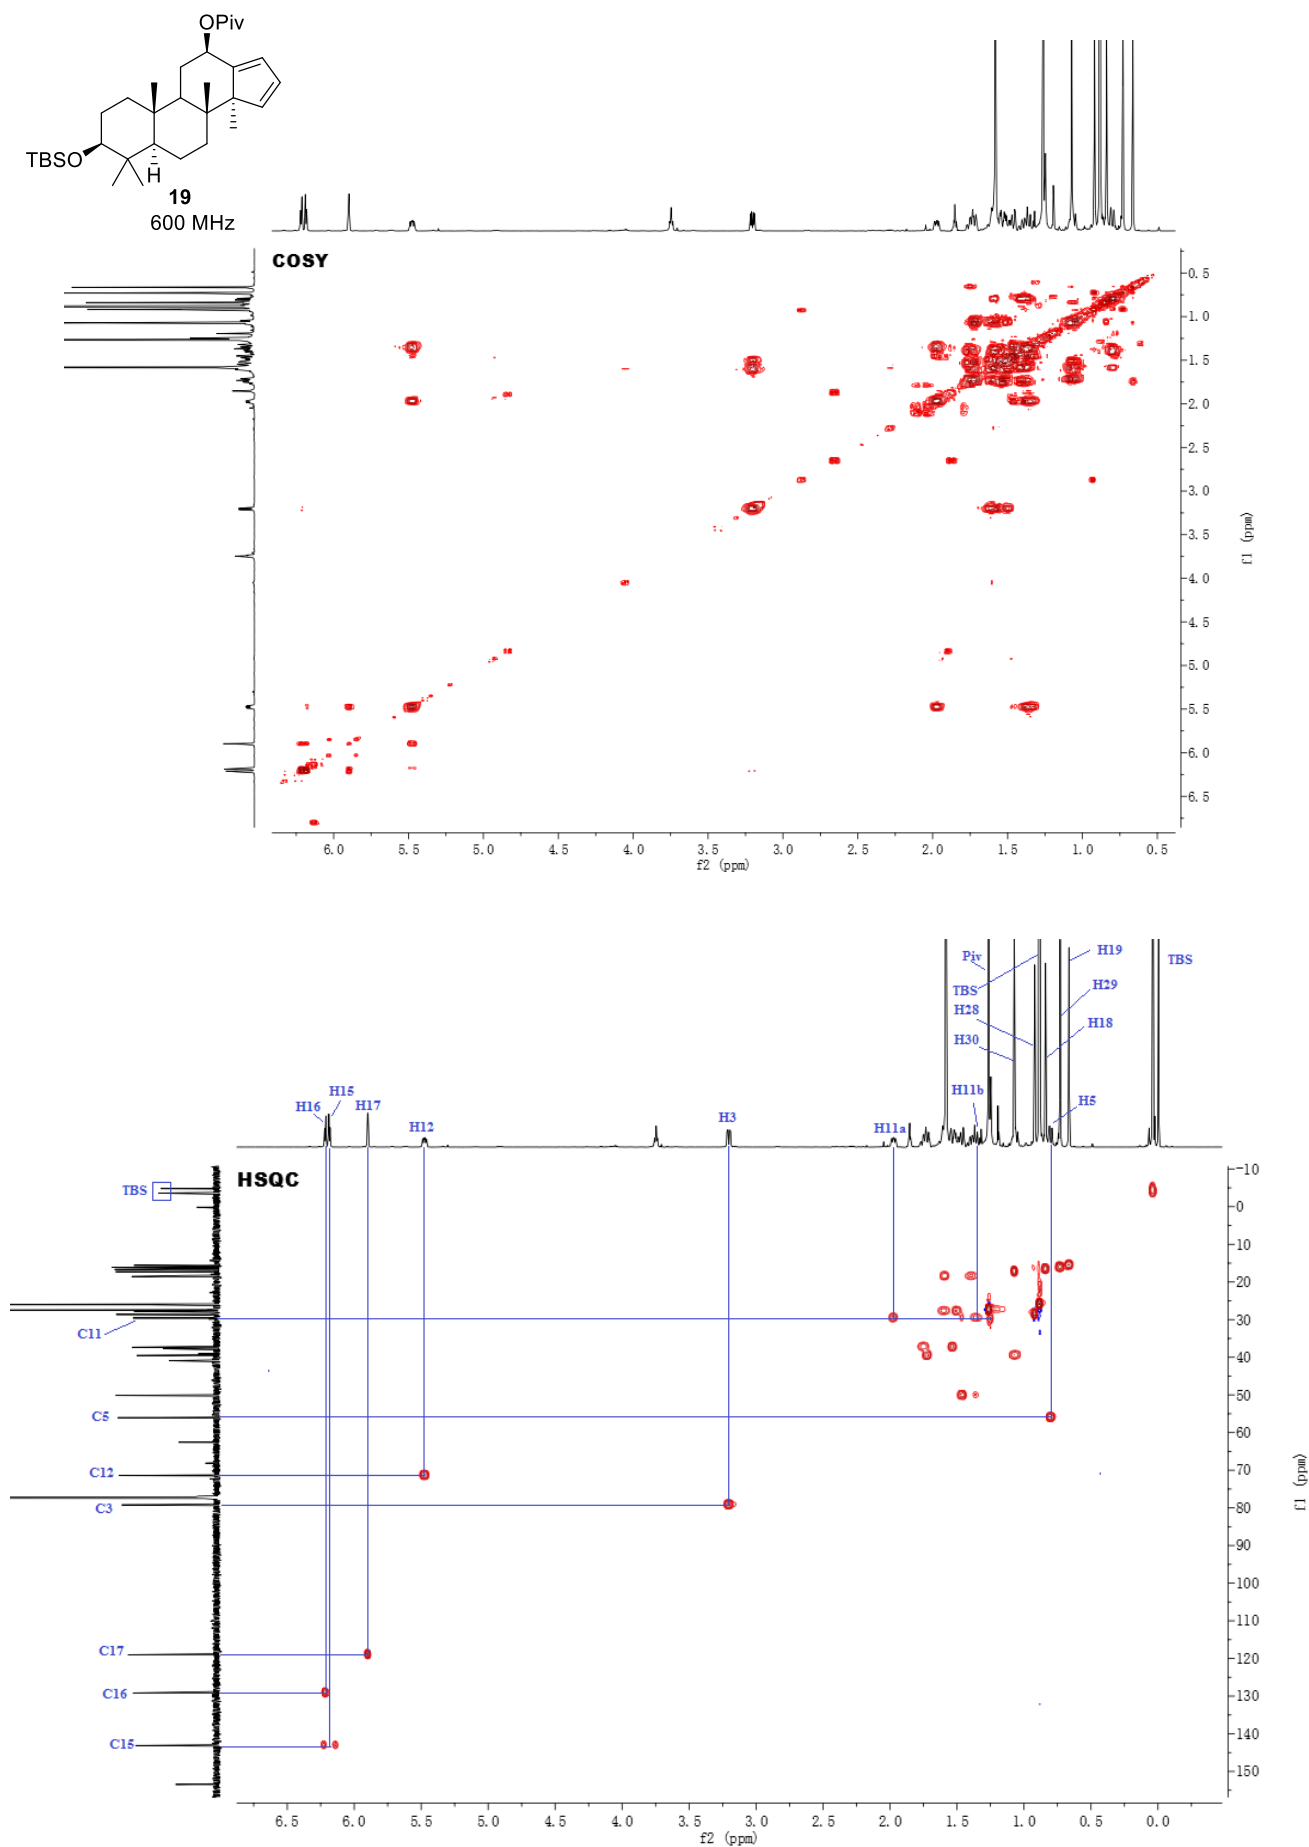

# Supporting Information

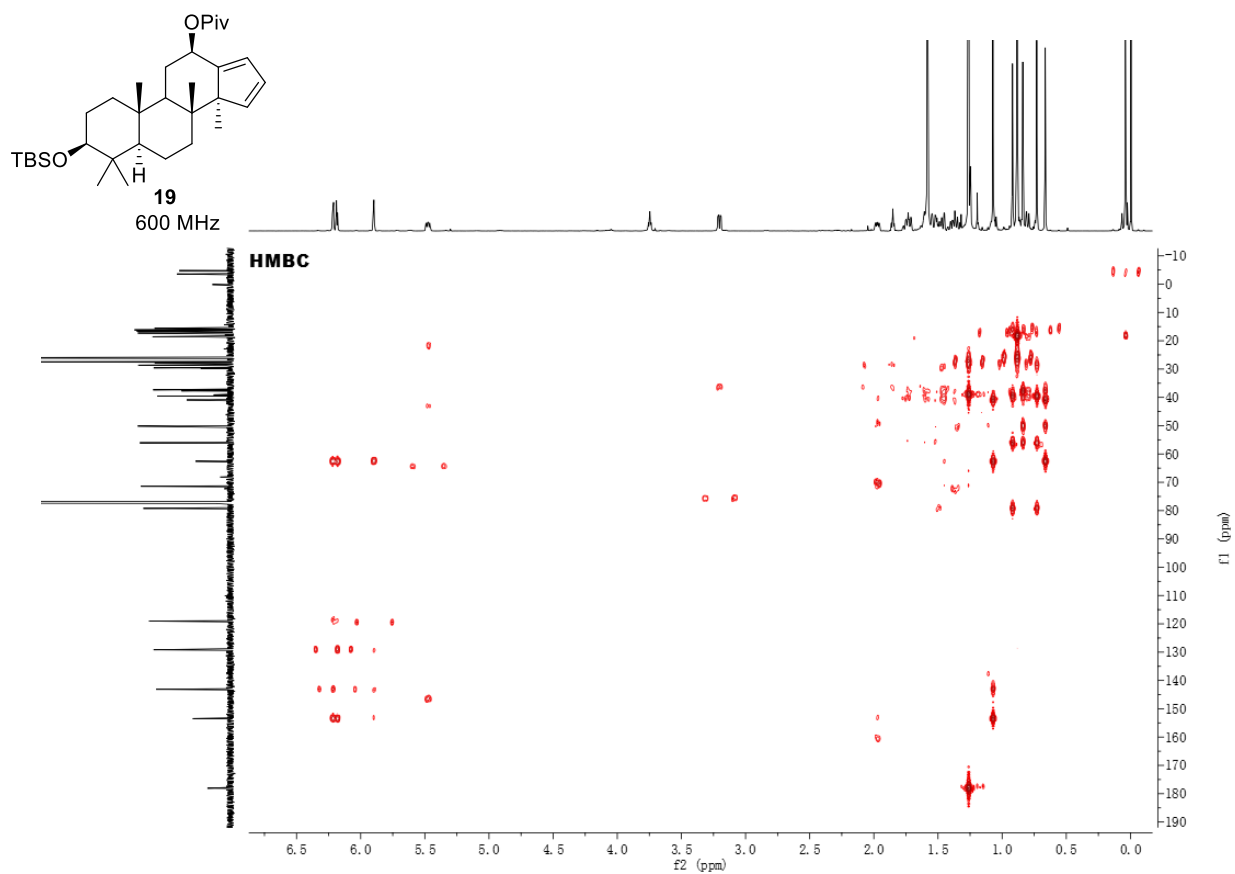

## S57

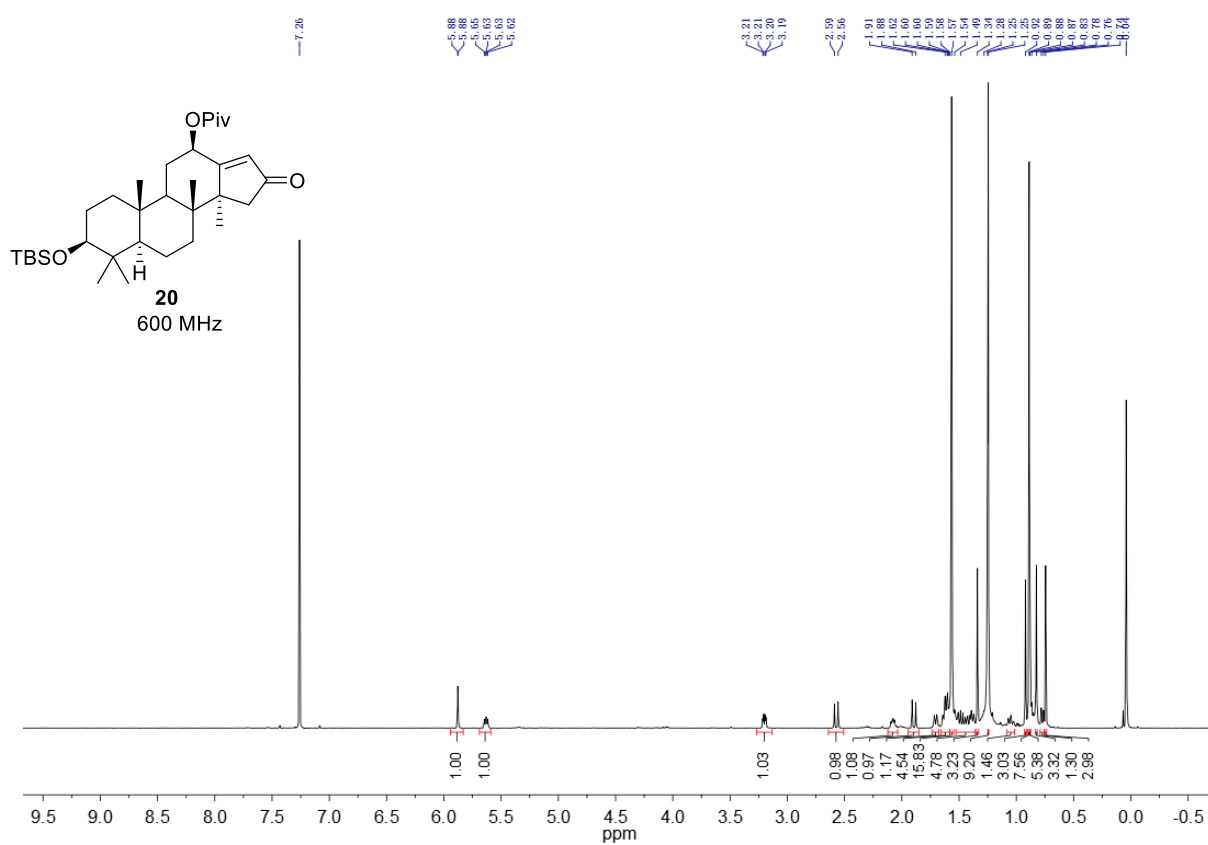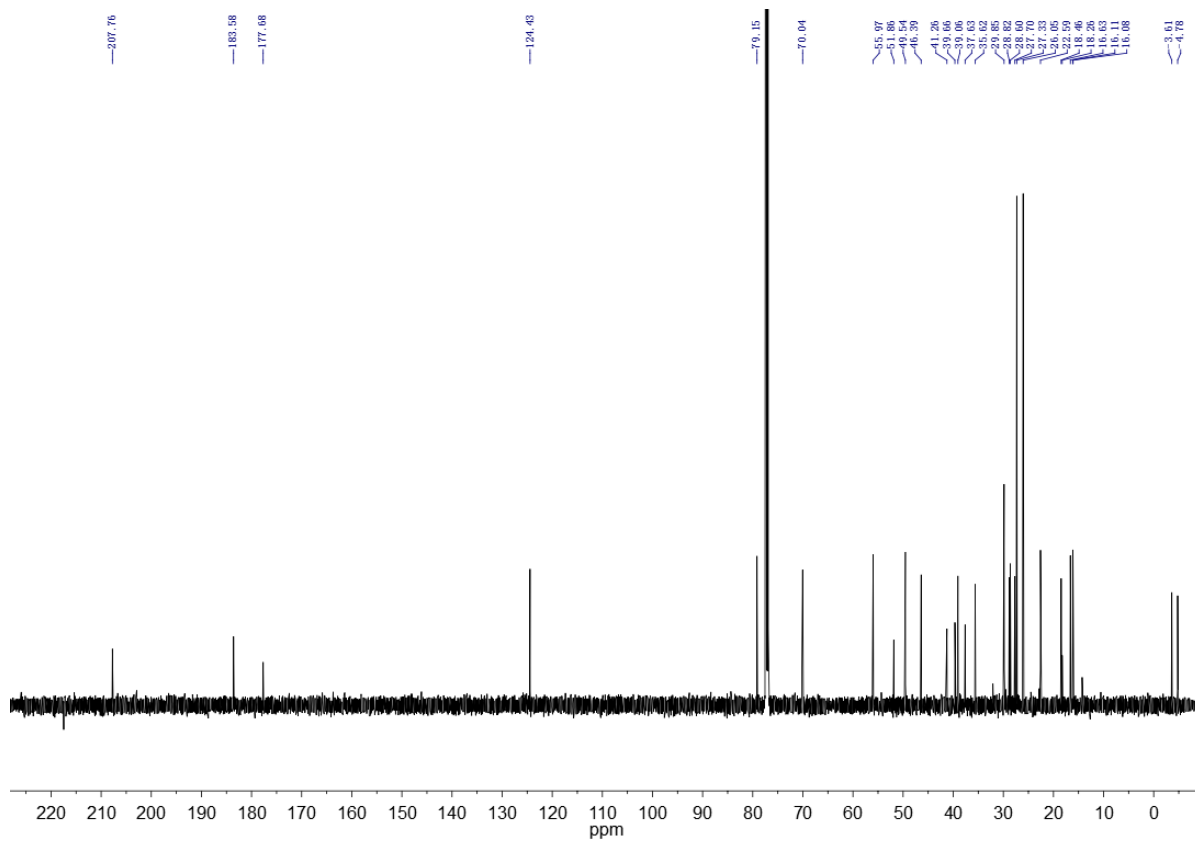

# Supporting Information

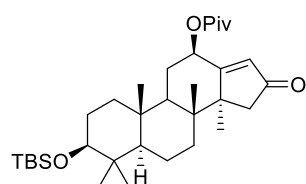

**20**  
600 MHz

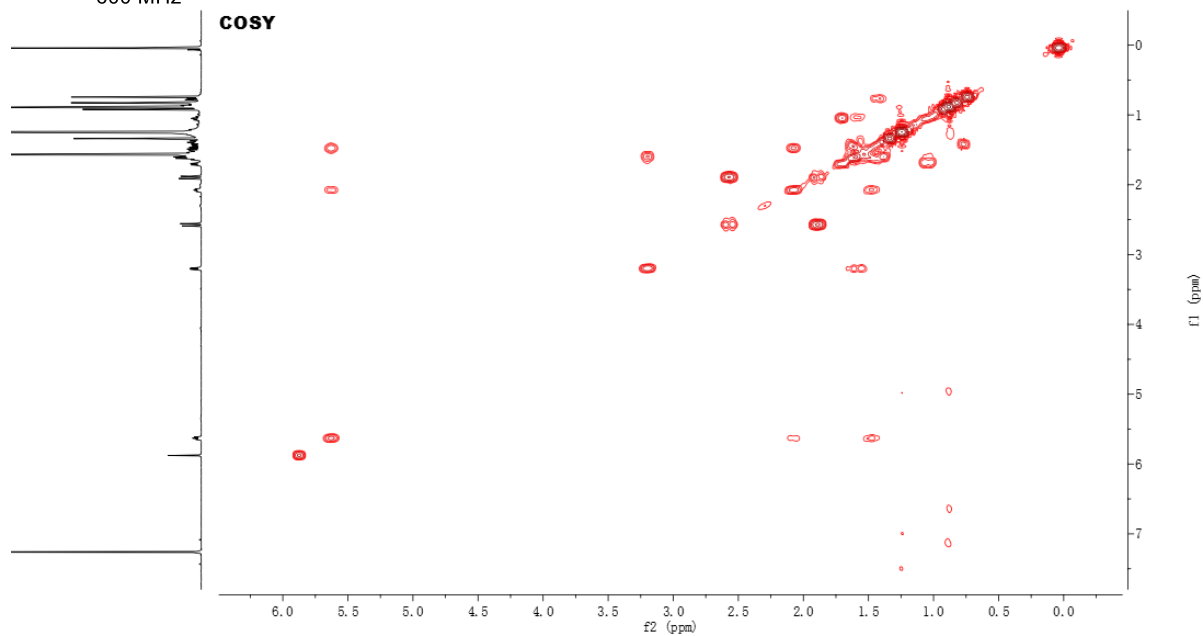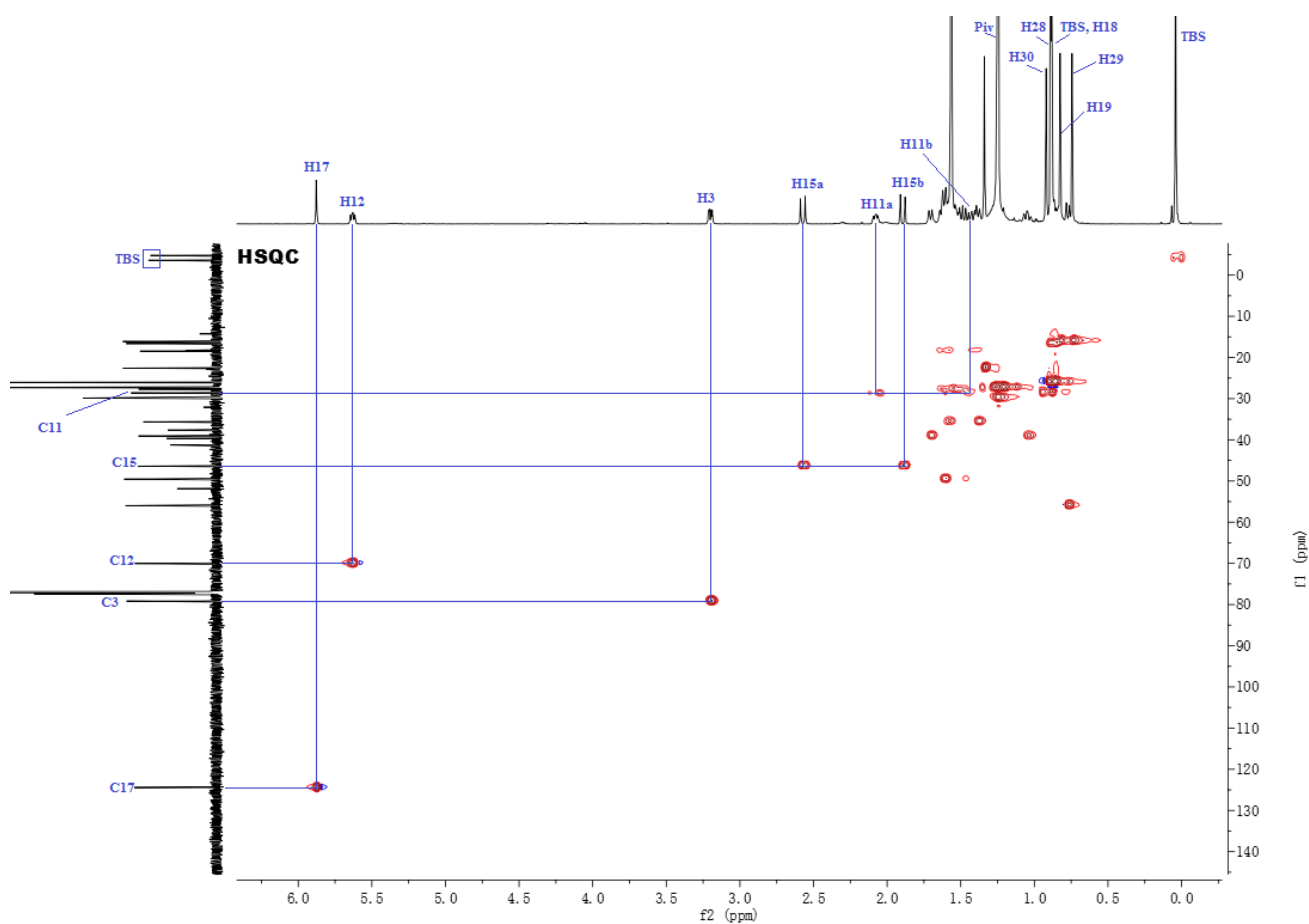

# Supporting Information

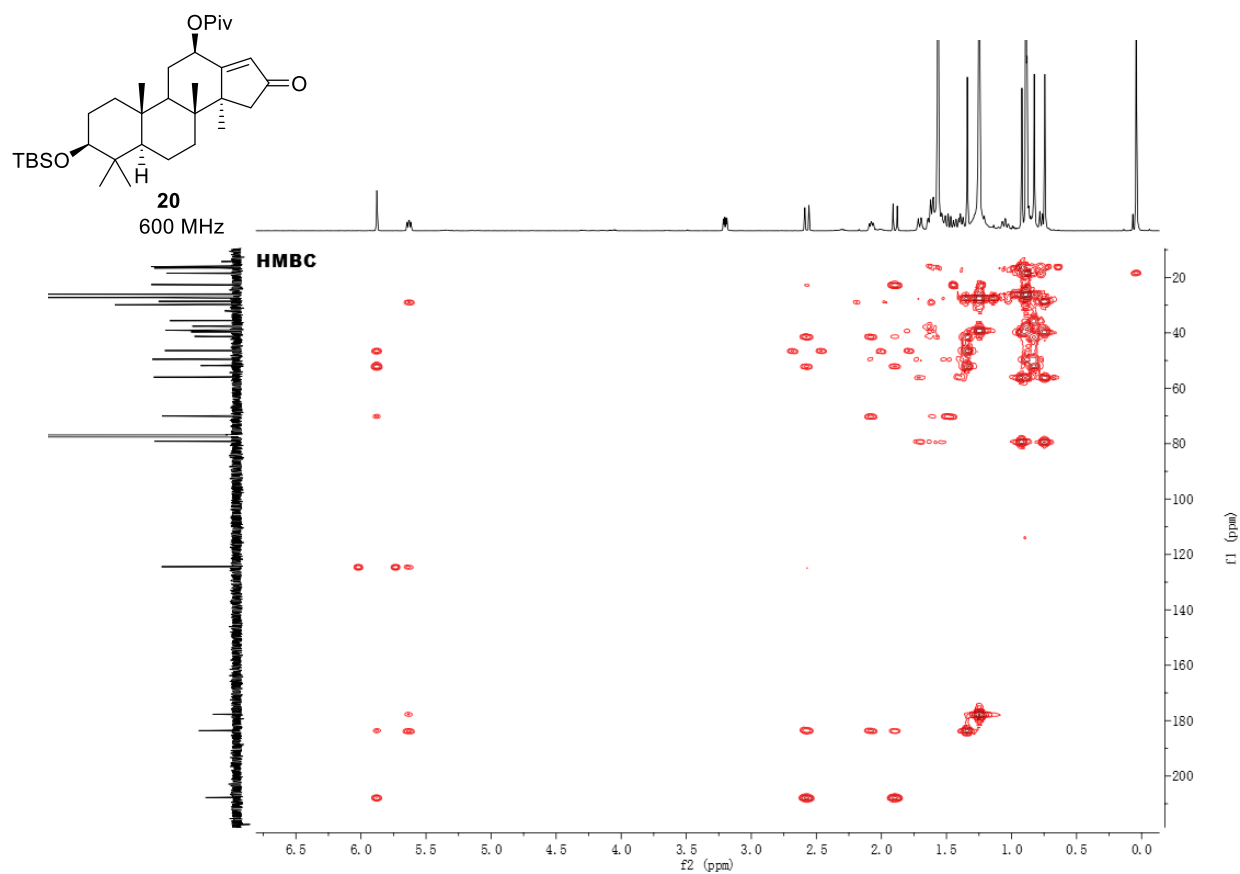

# Supporting Information

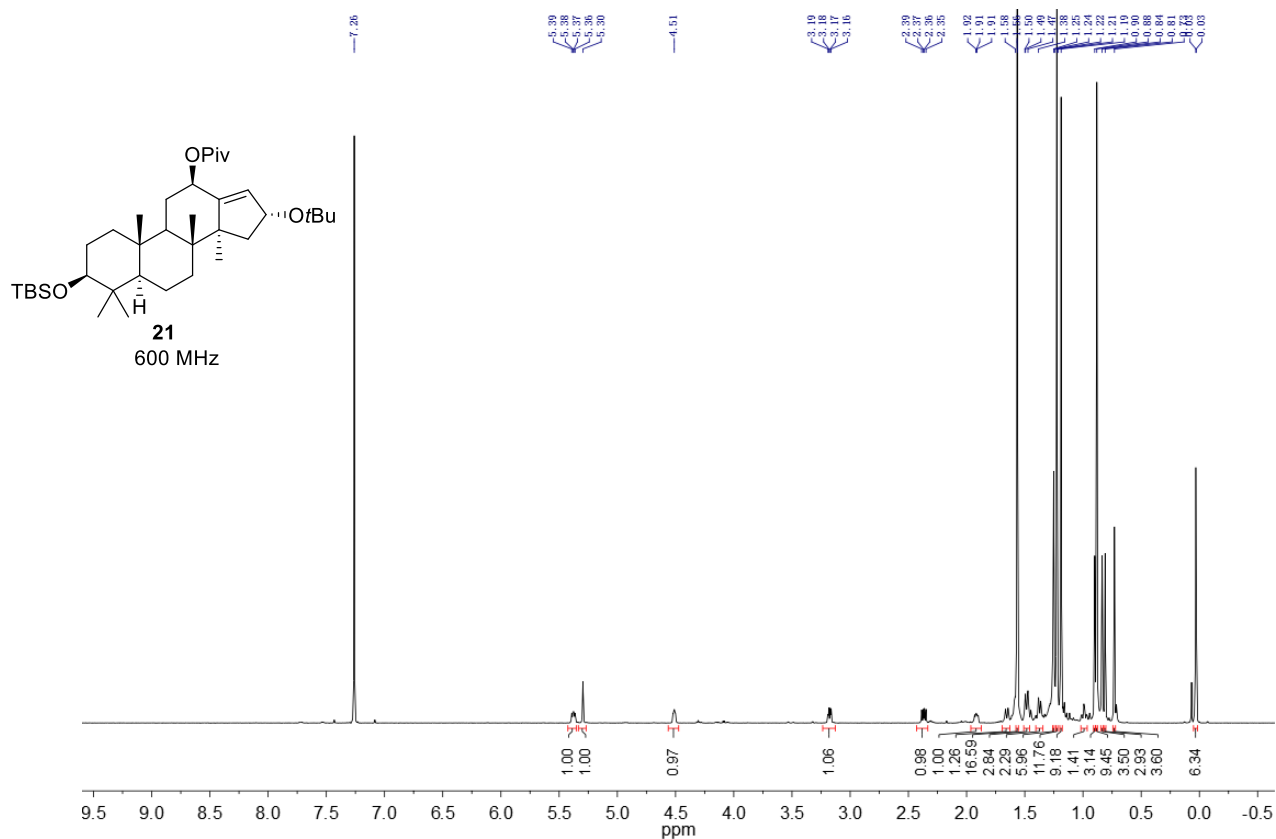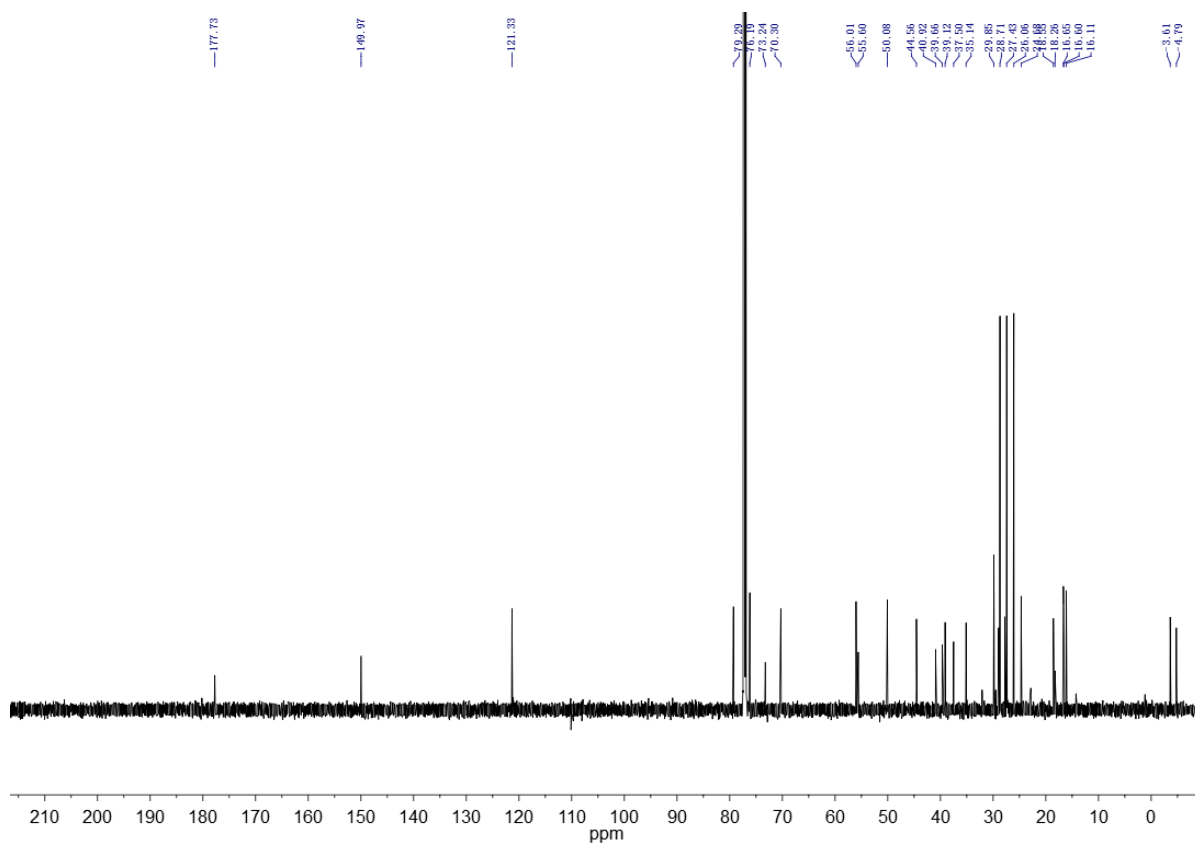



# Supporting Information

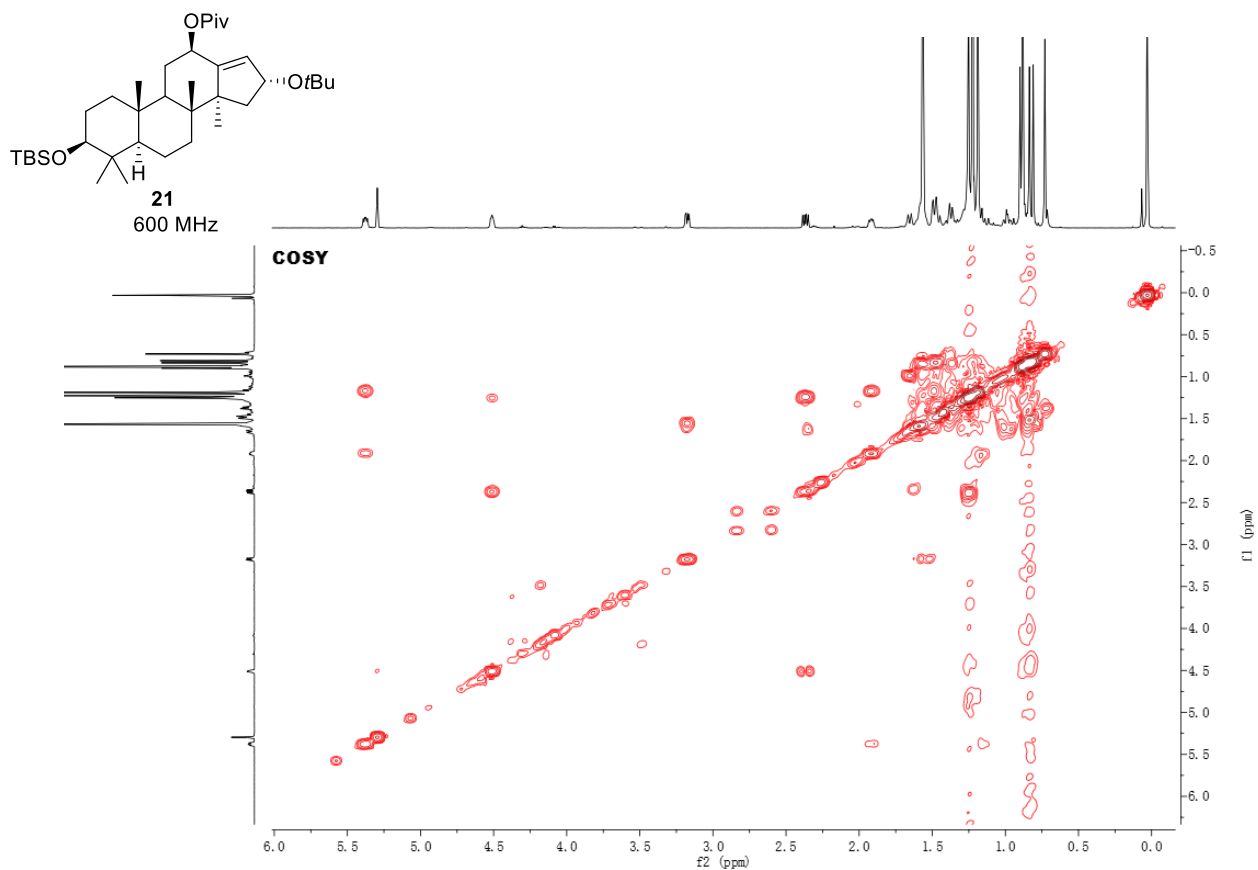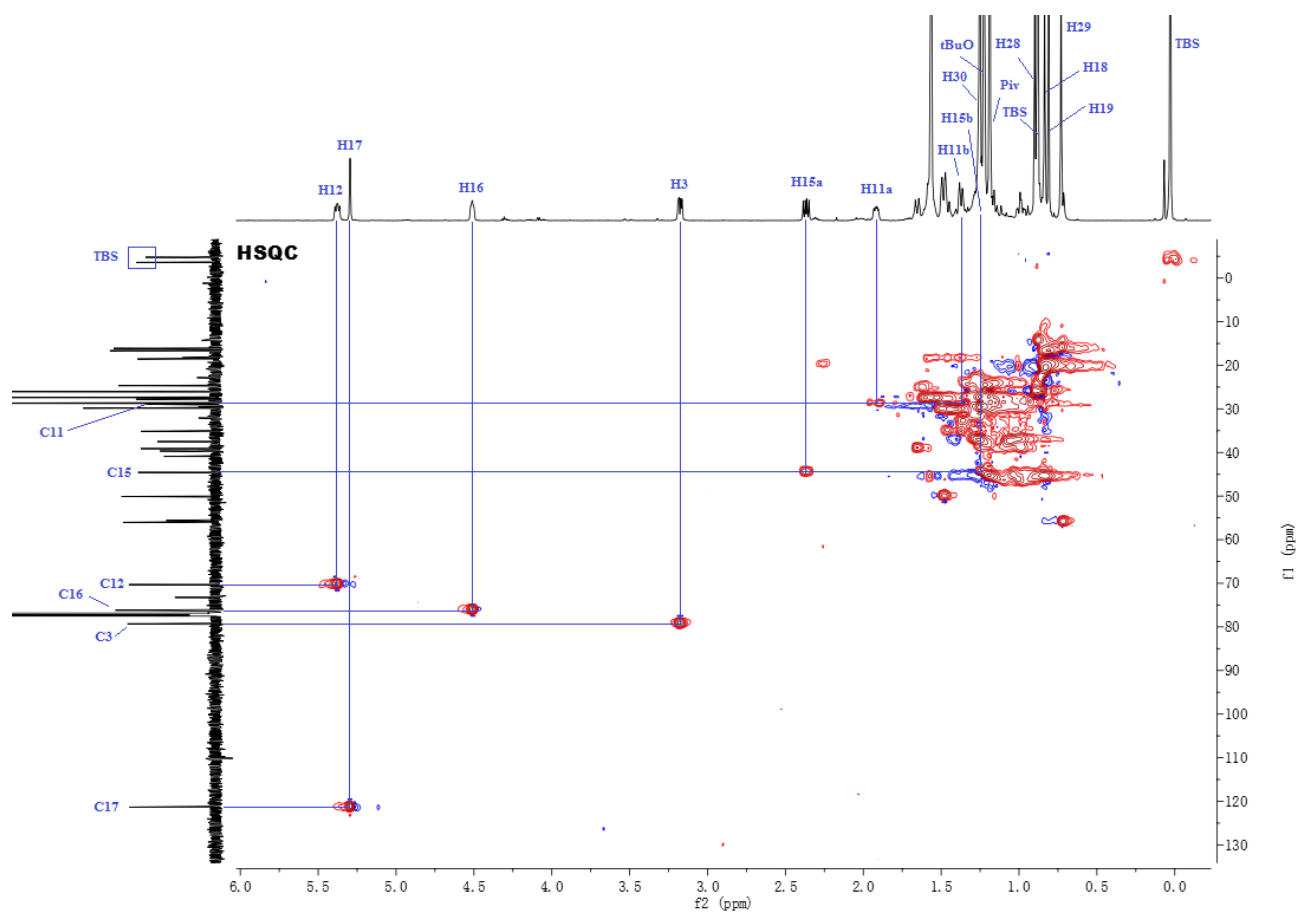

# Supporting Information

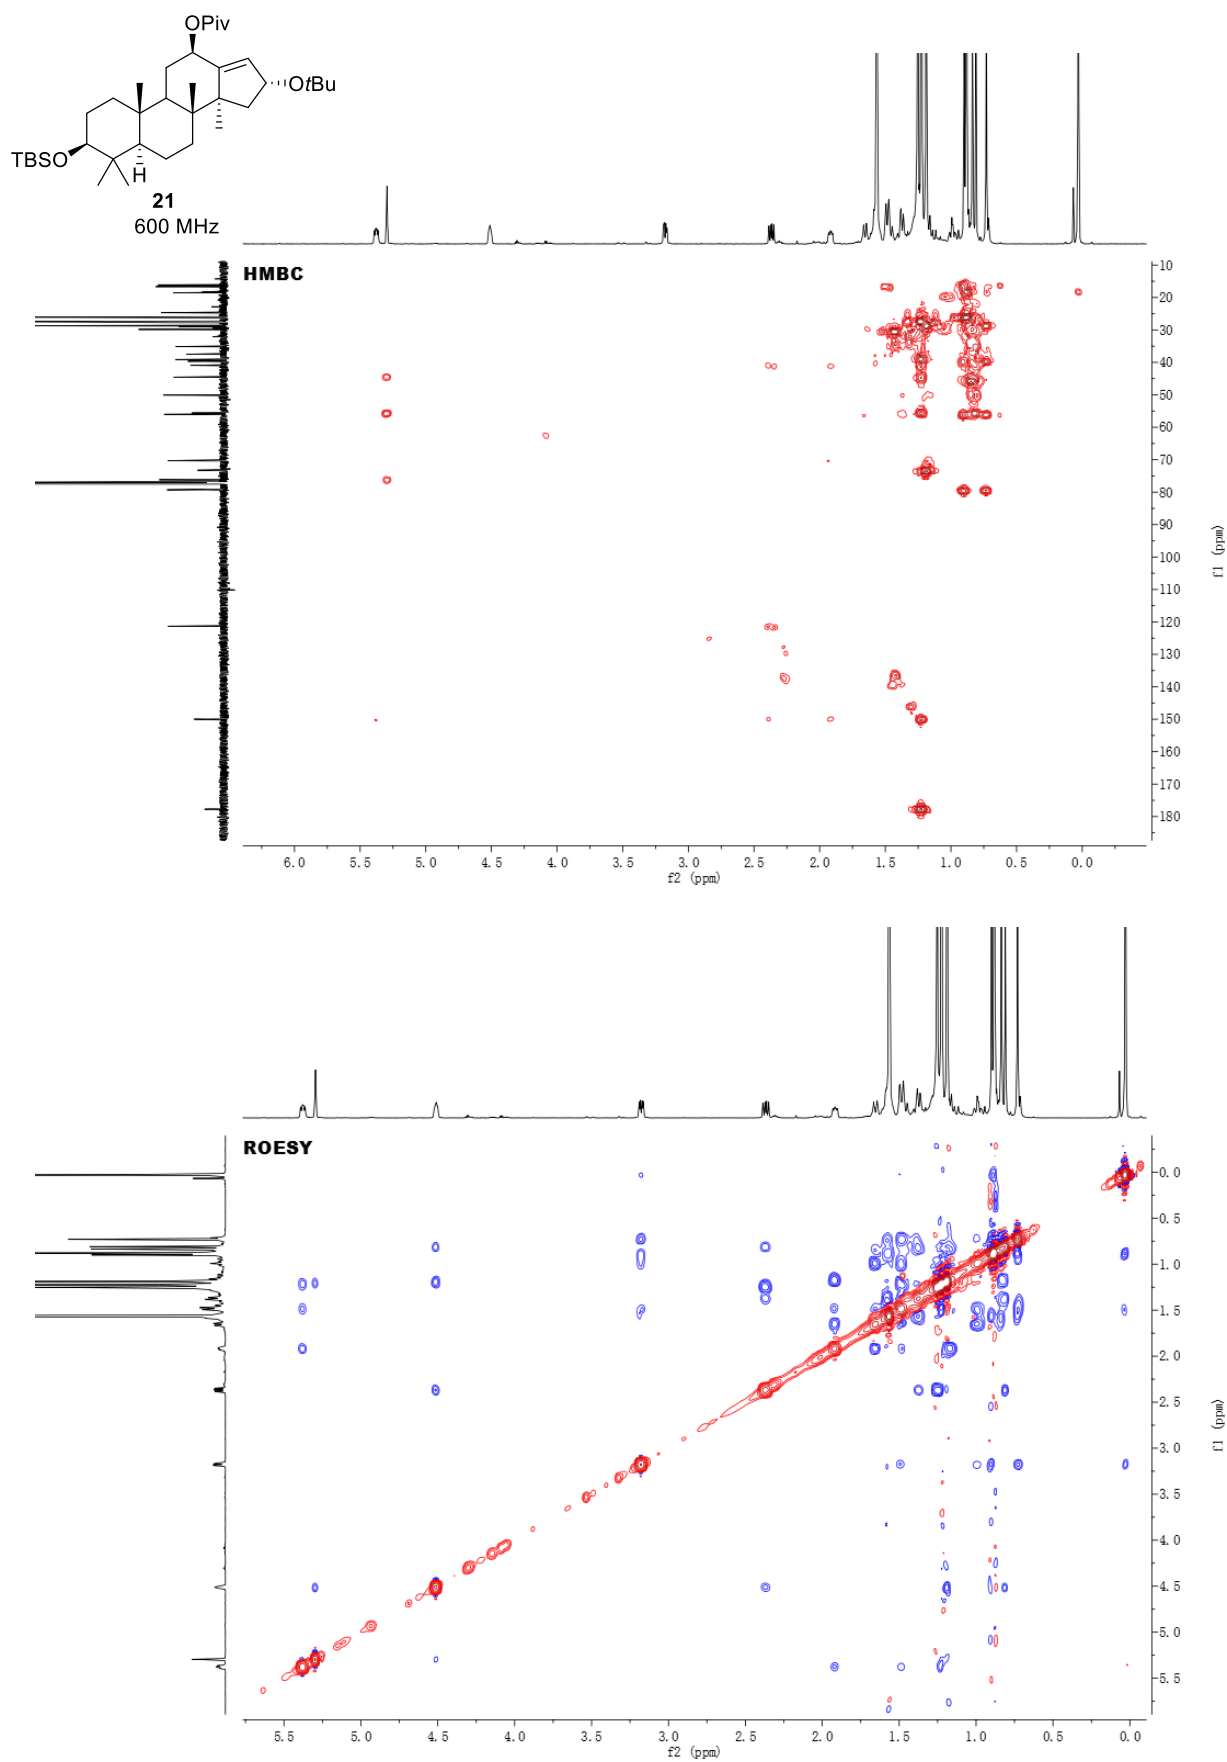

# Supporting Information

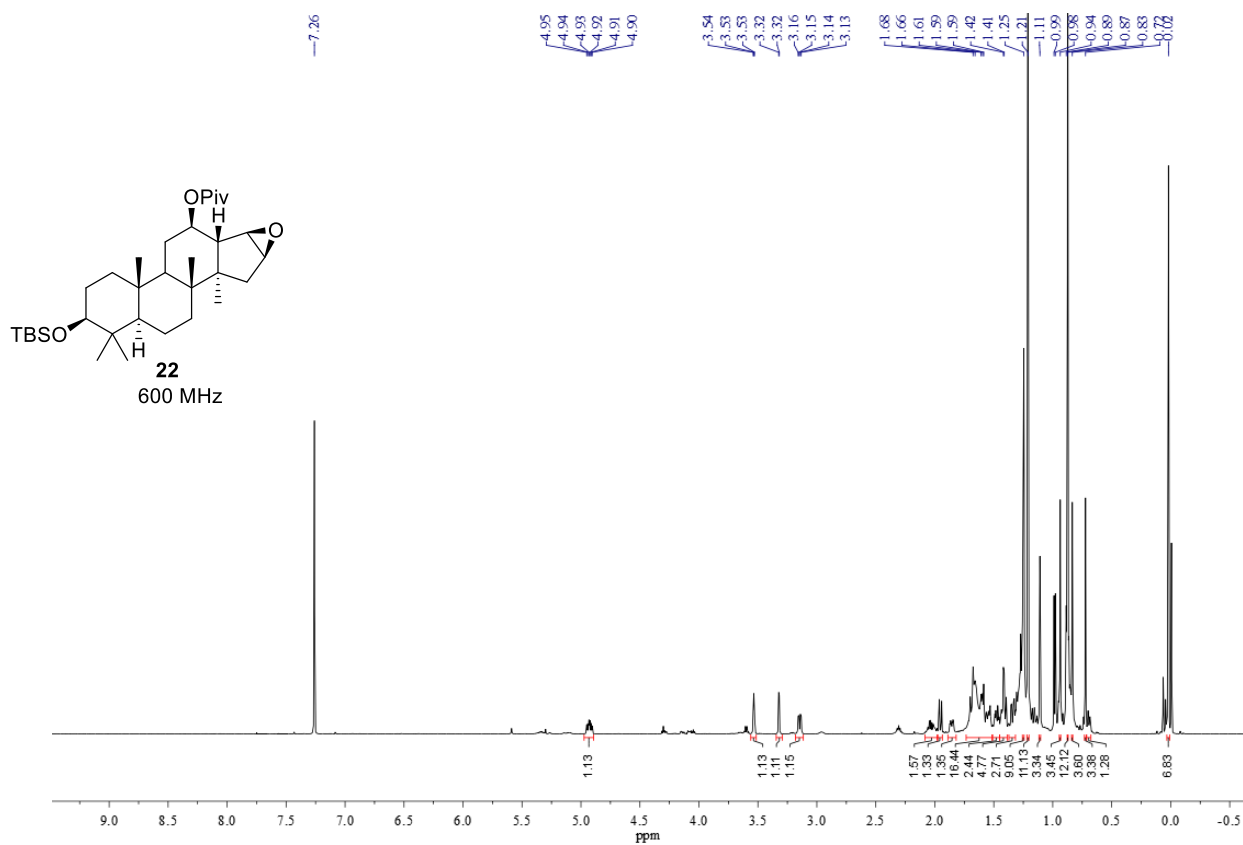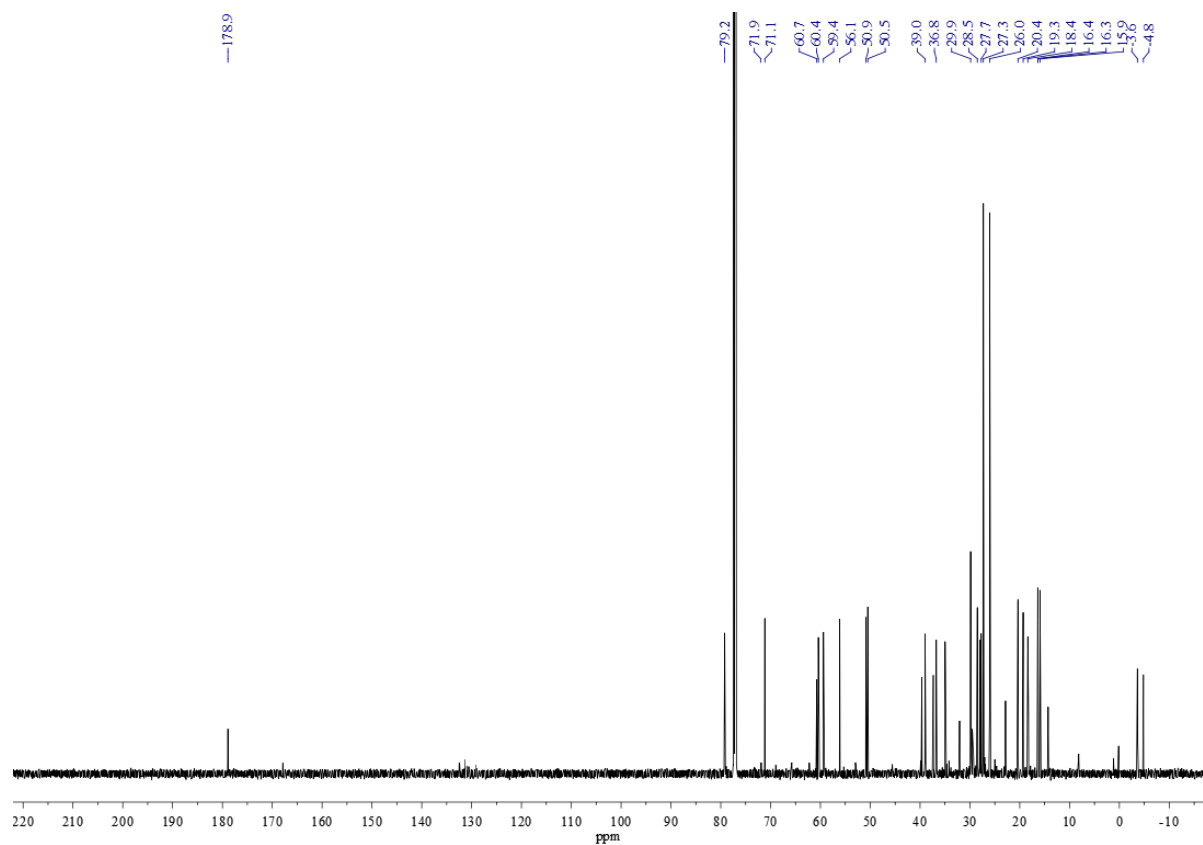

## Supporting Information

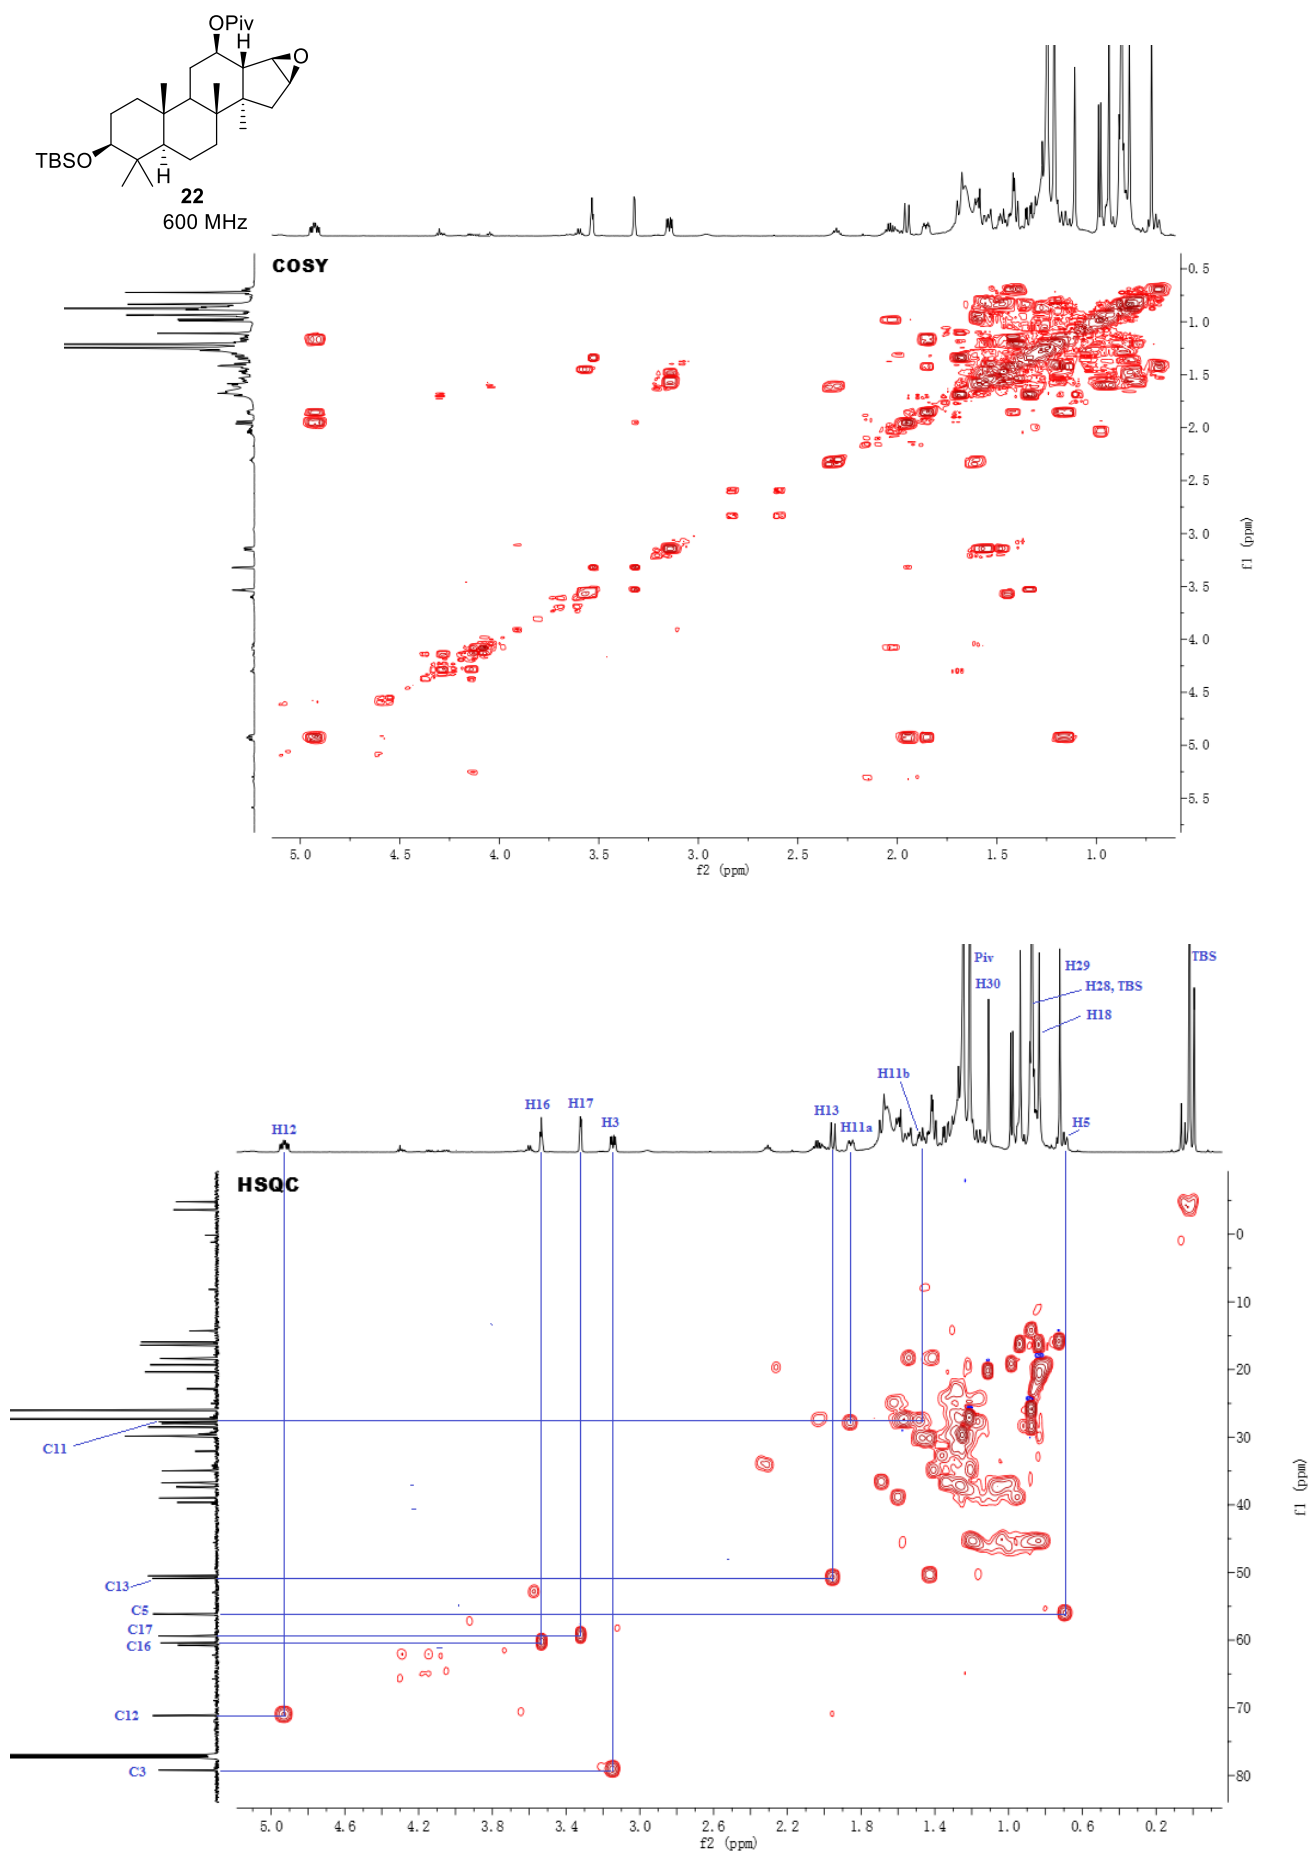

# Supporting Information

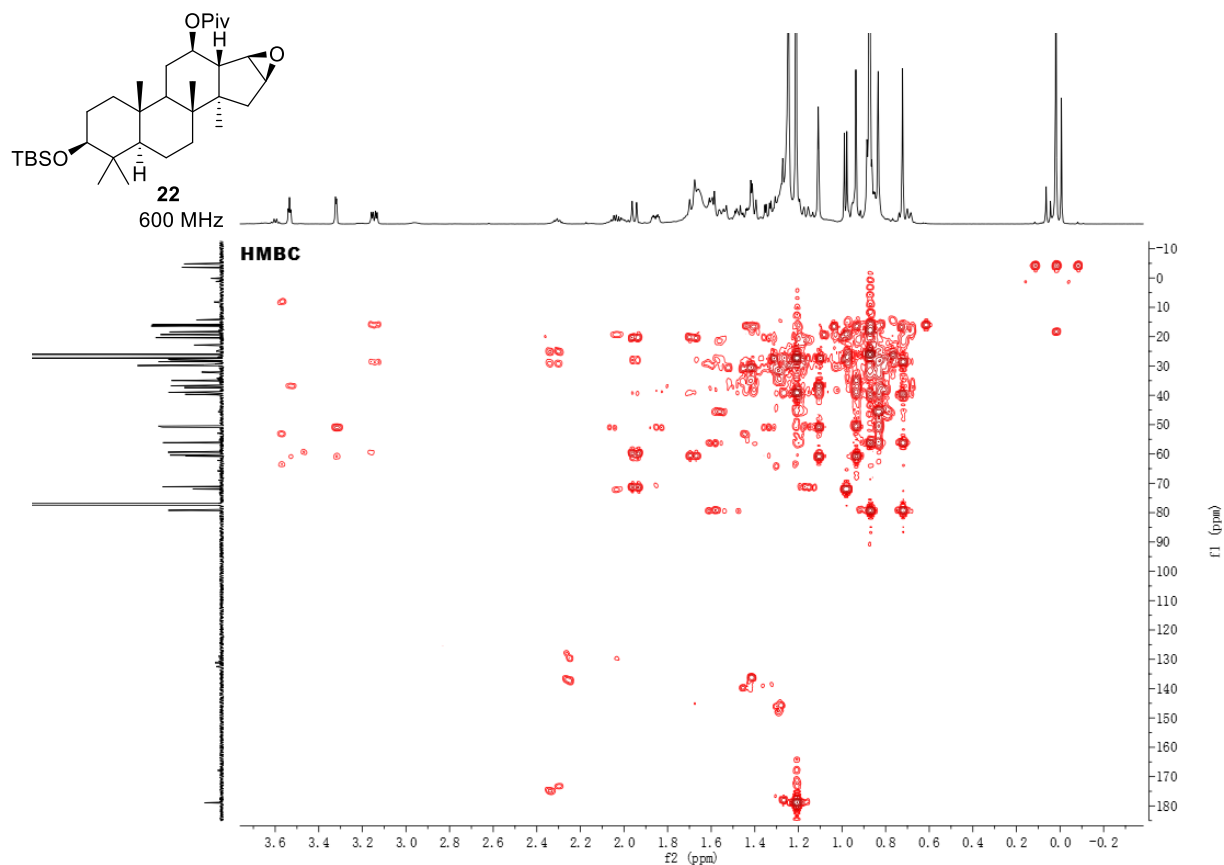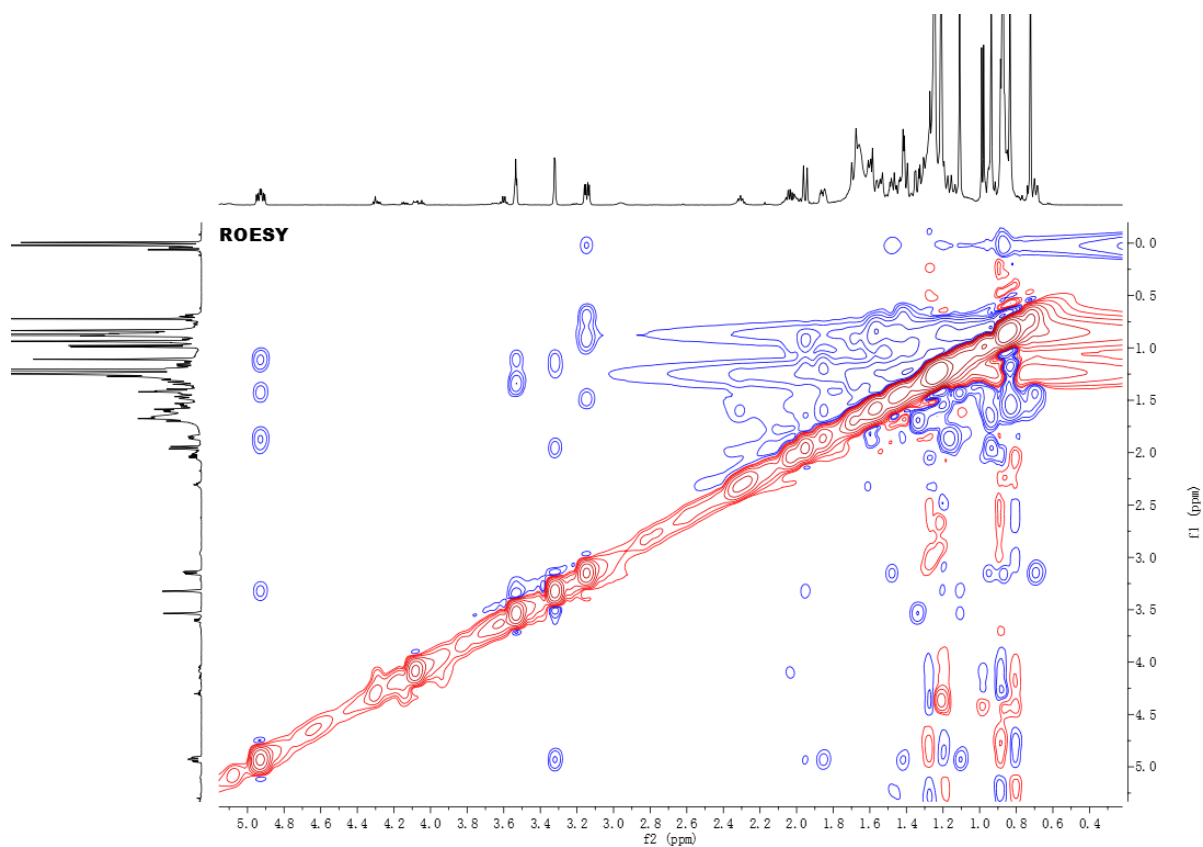

## S66

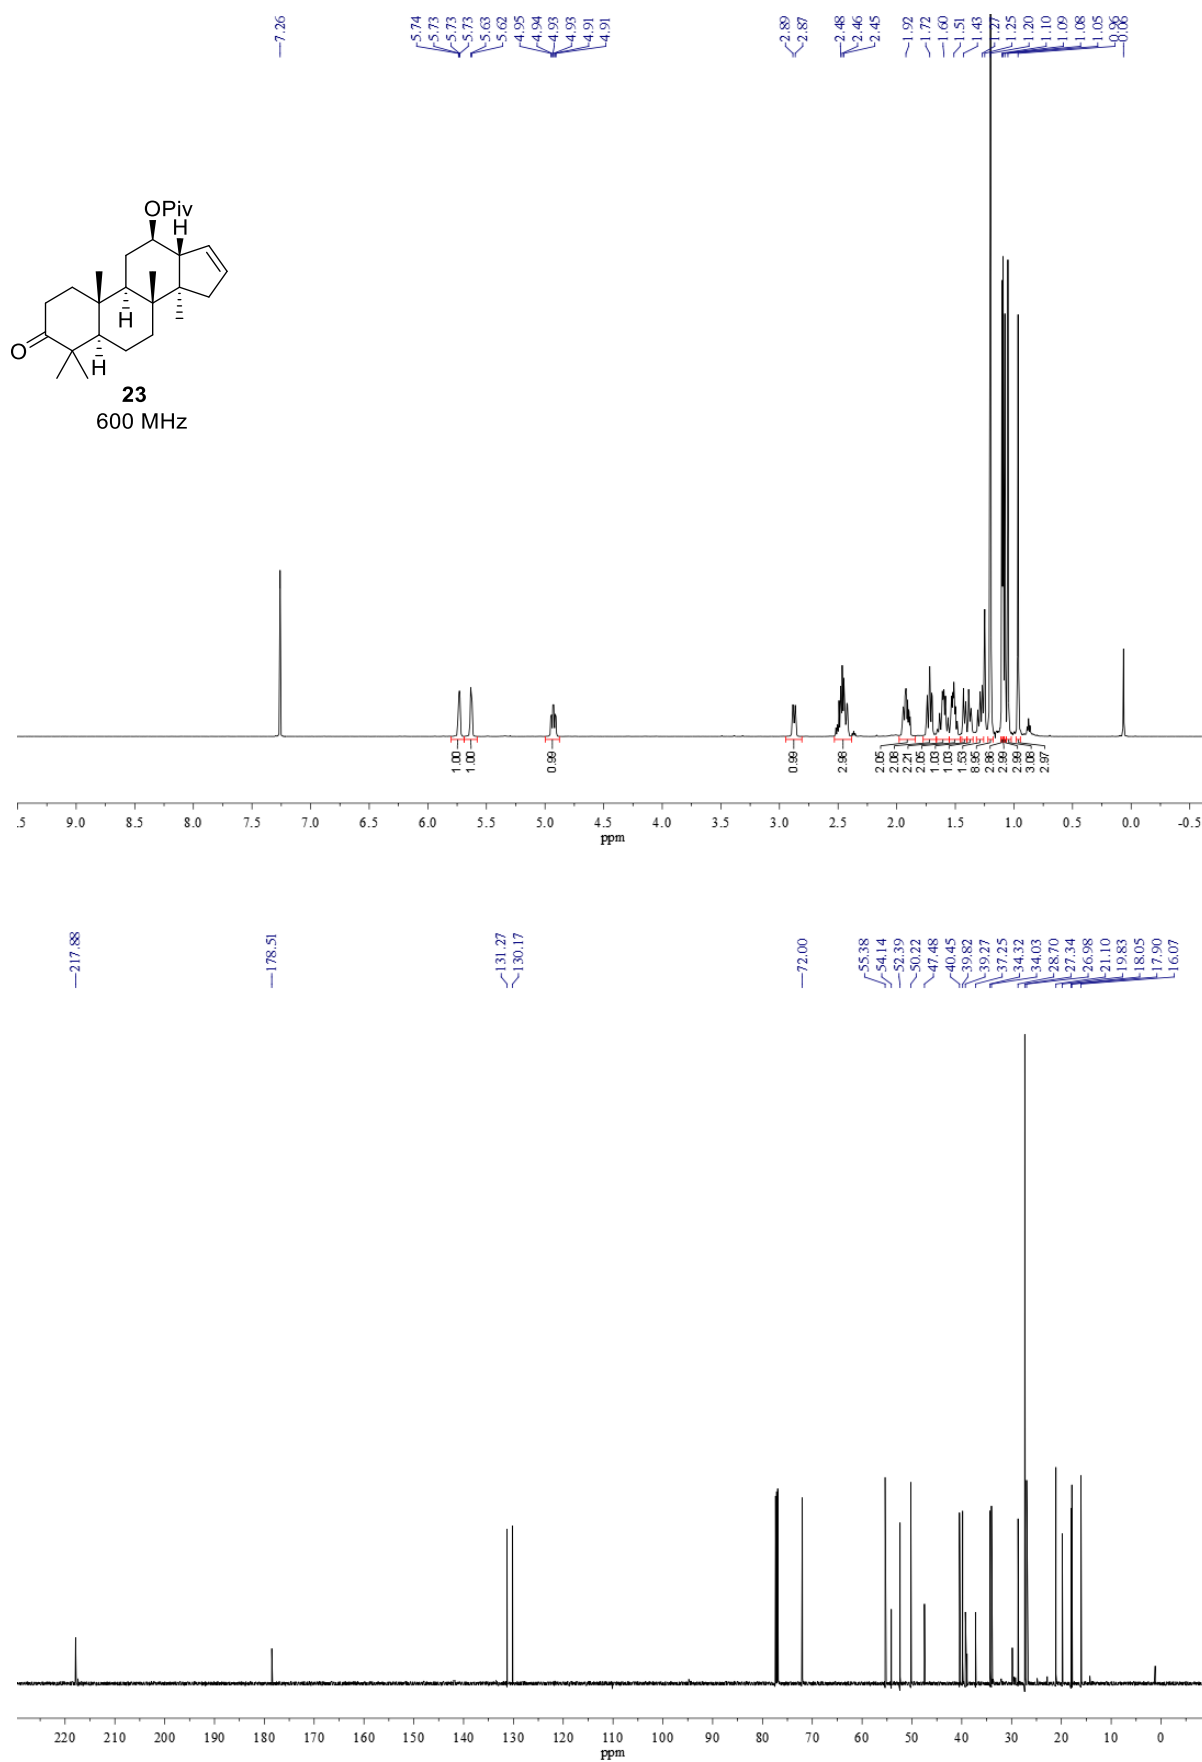

# Supporting Information

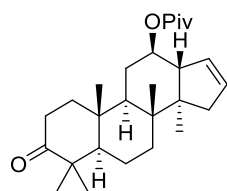

**23**

600 MHz

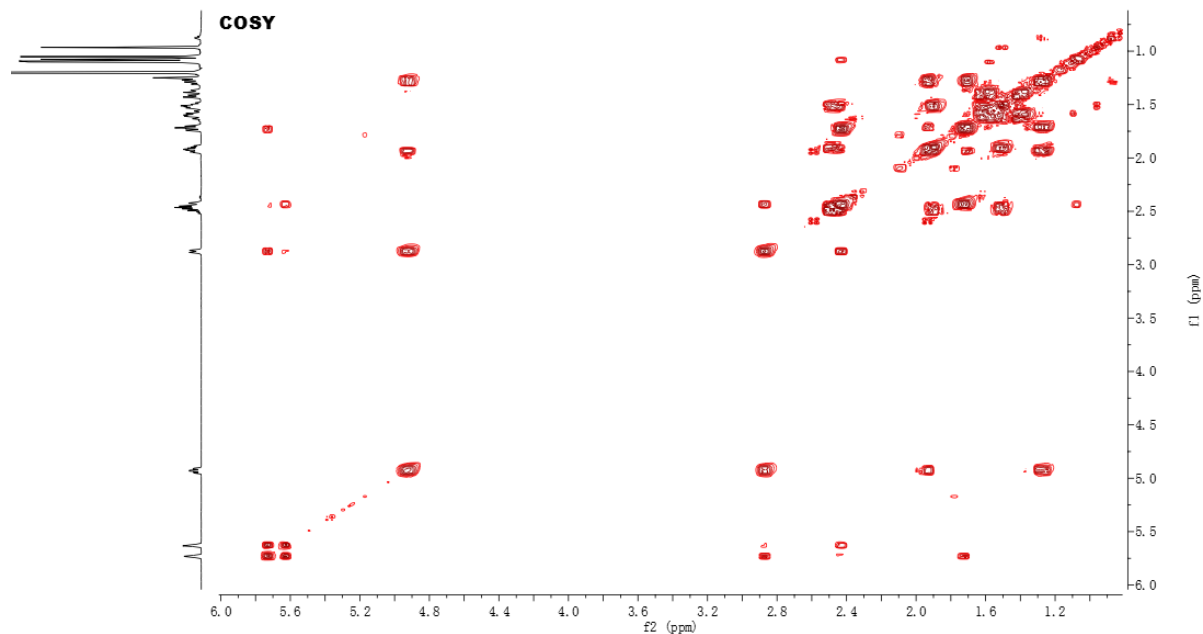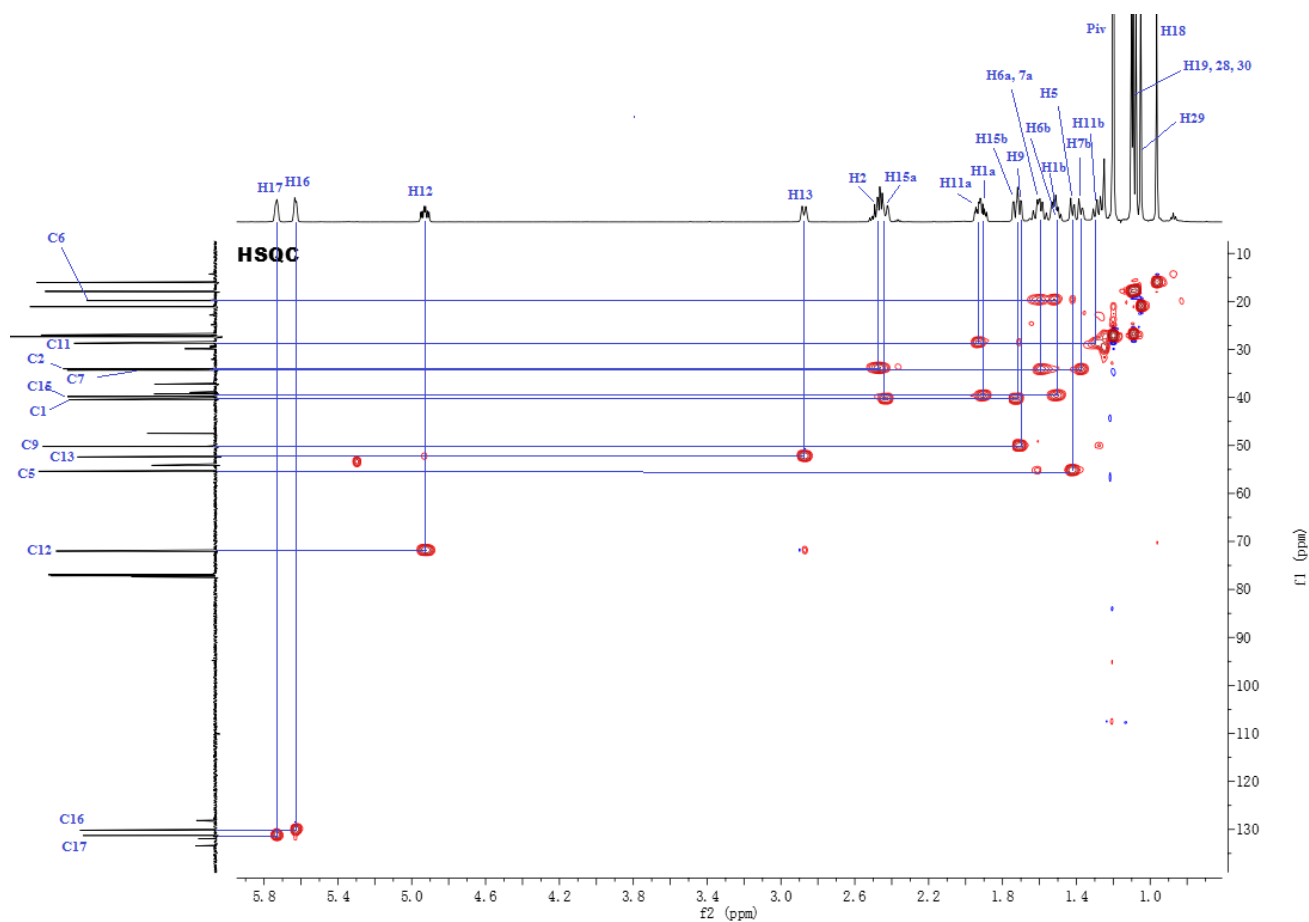

# Supporting Information

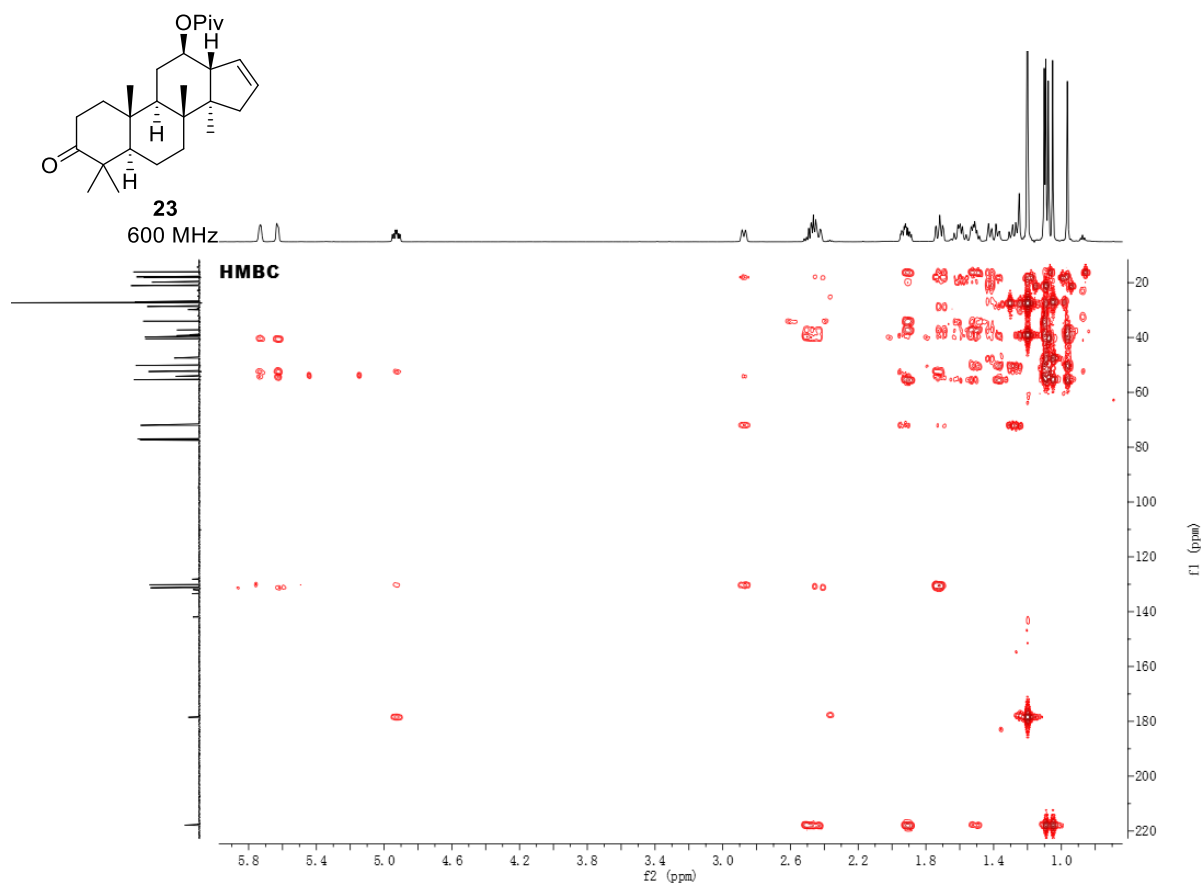



# Supporting Information

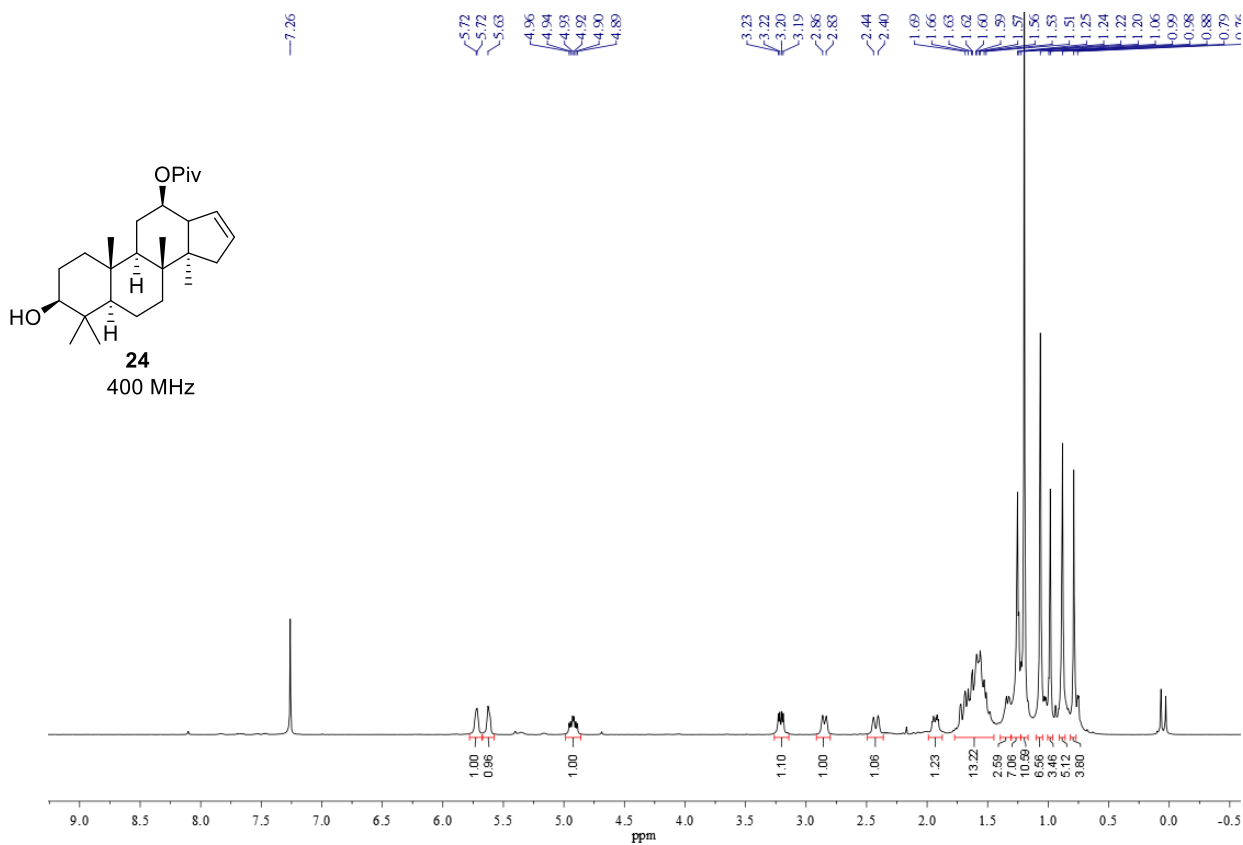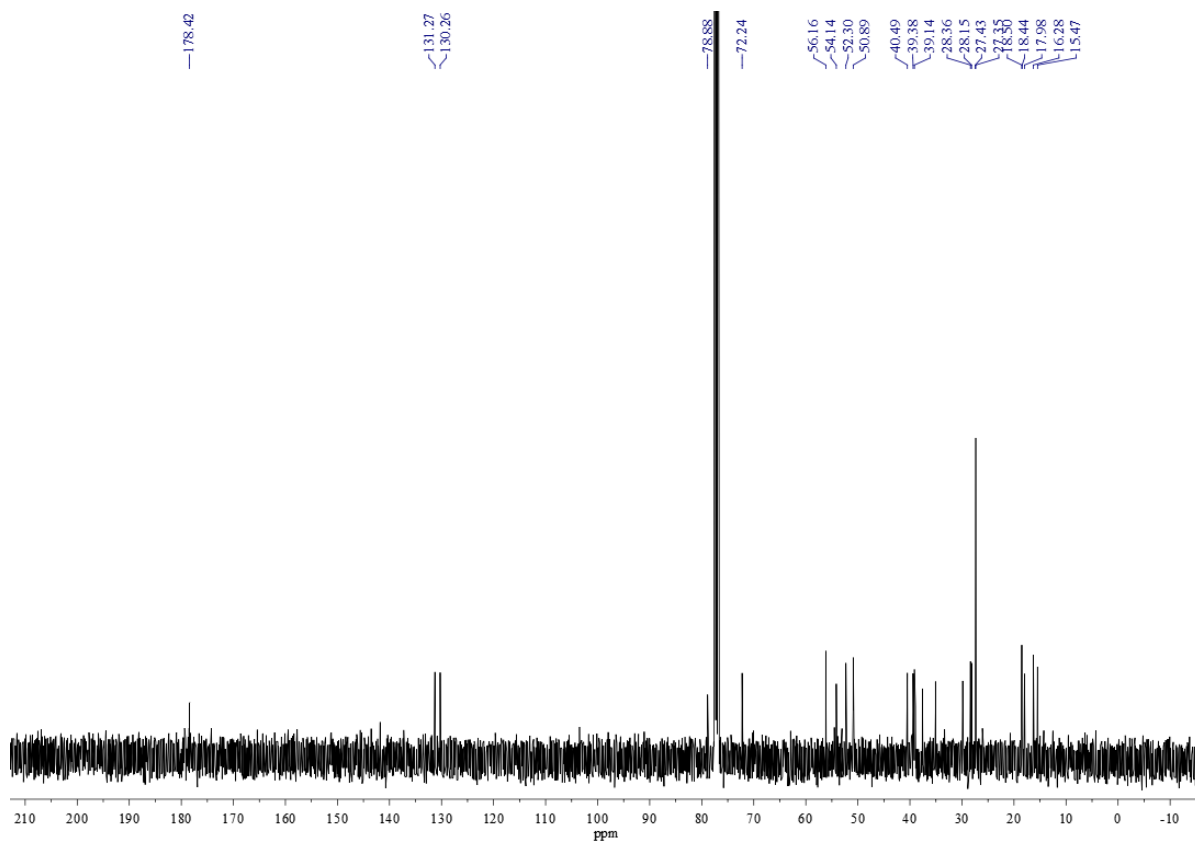

# Supporting Information

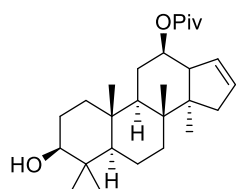

**24**  
400 MHz

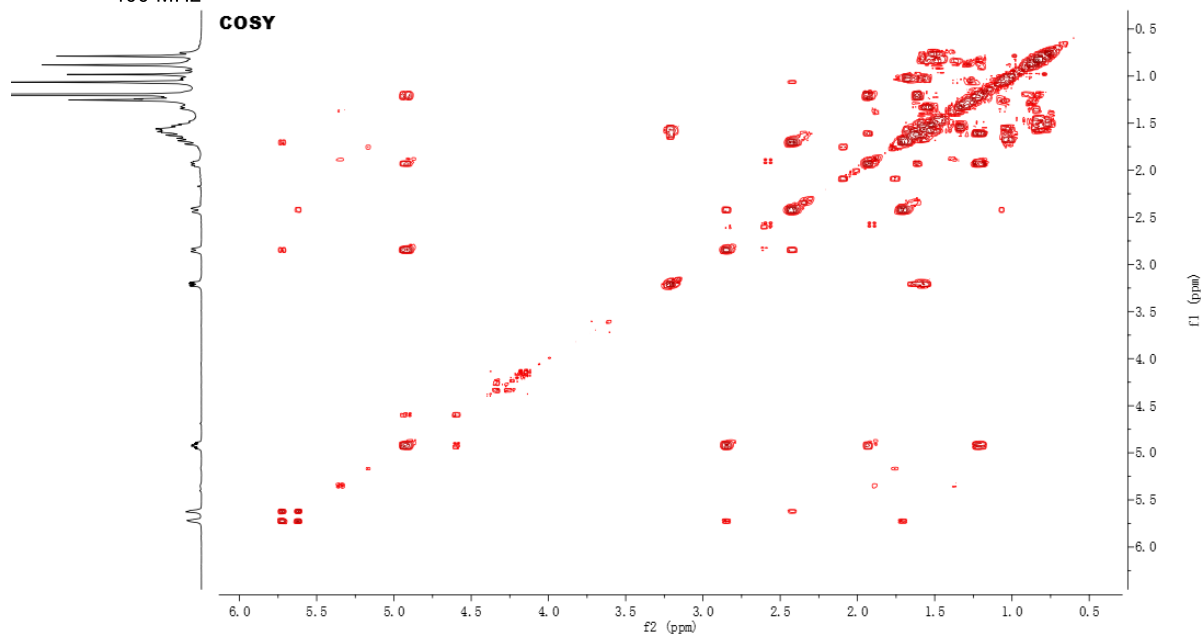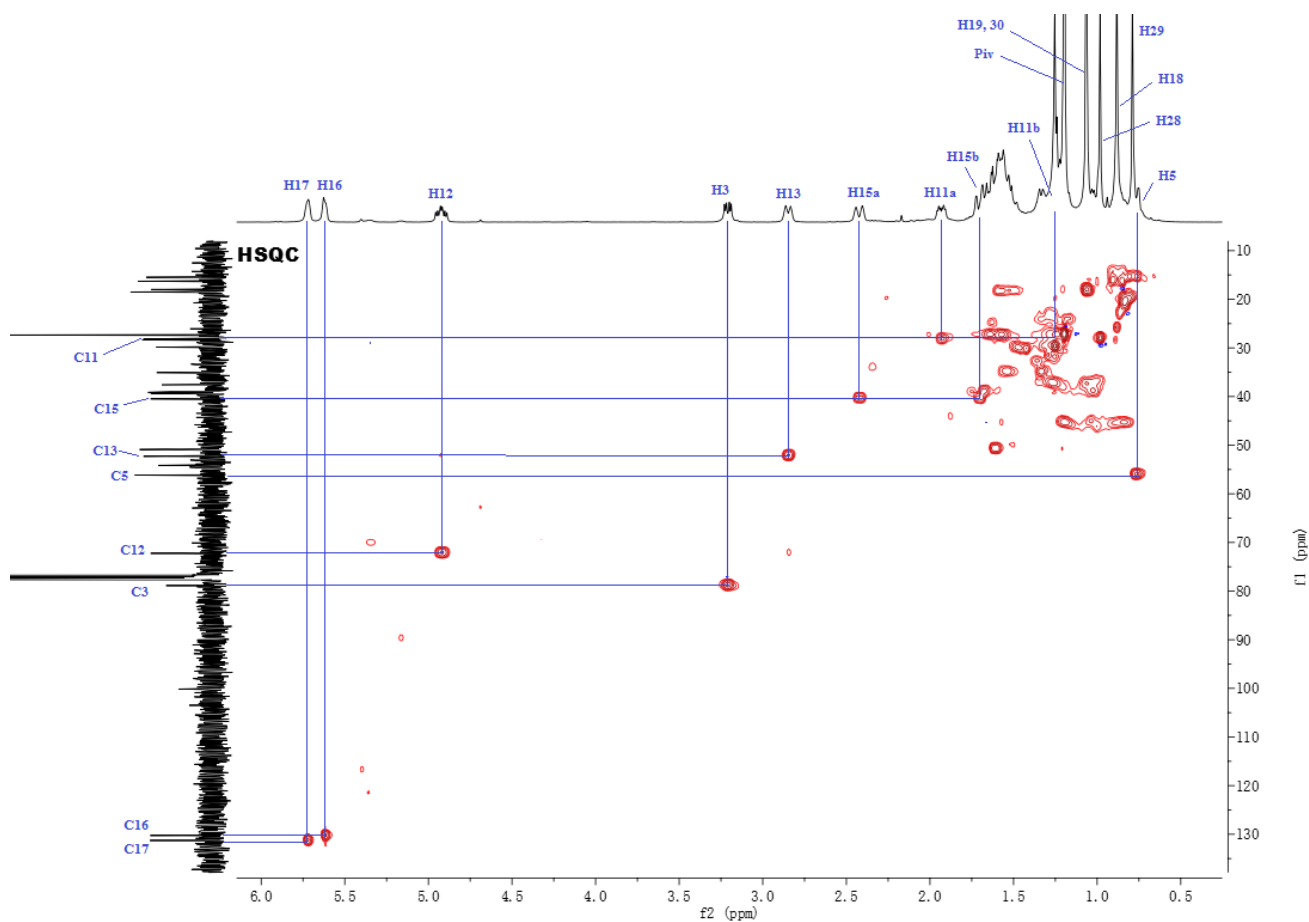

# Supporting Information

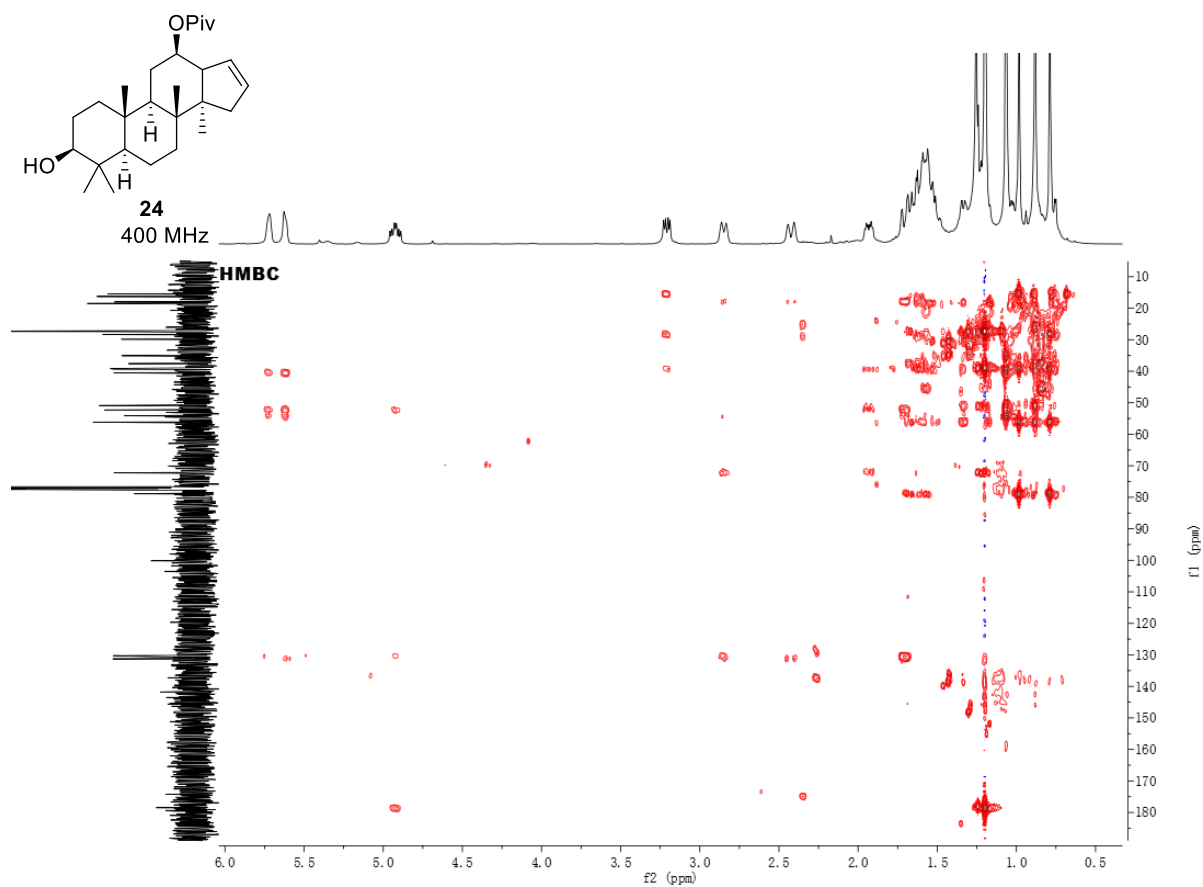

# Supporting Information

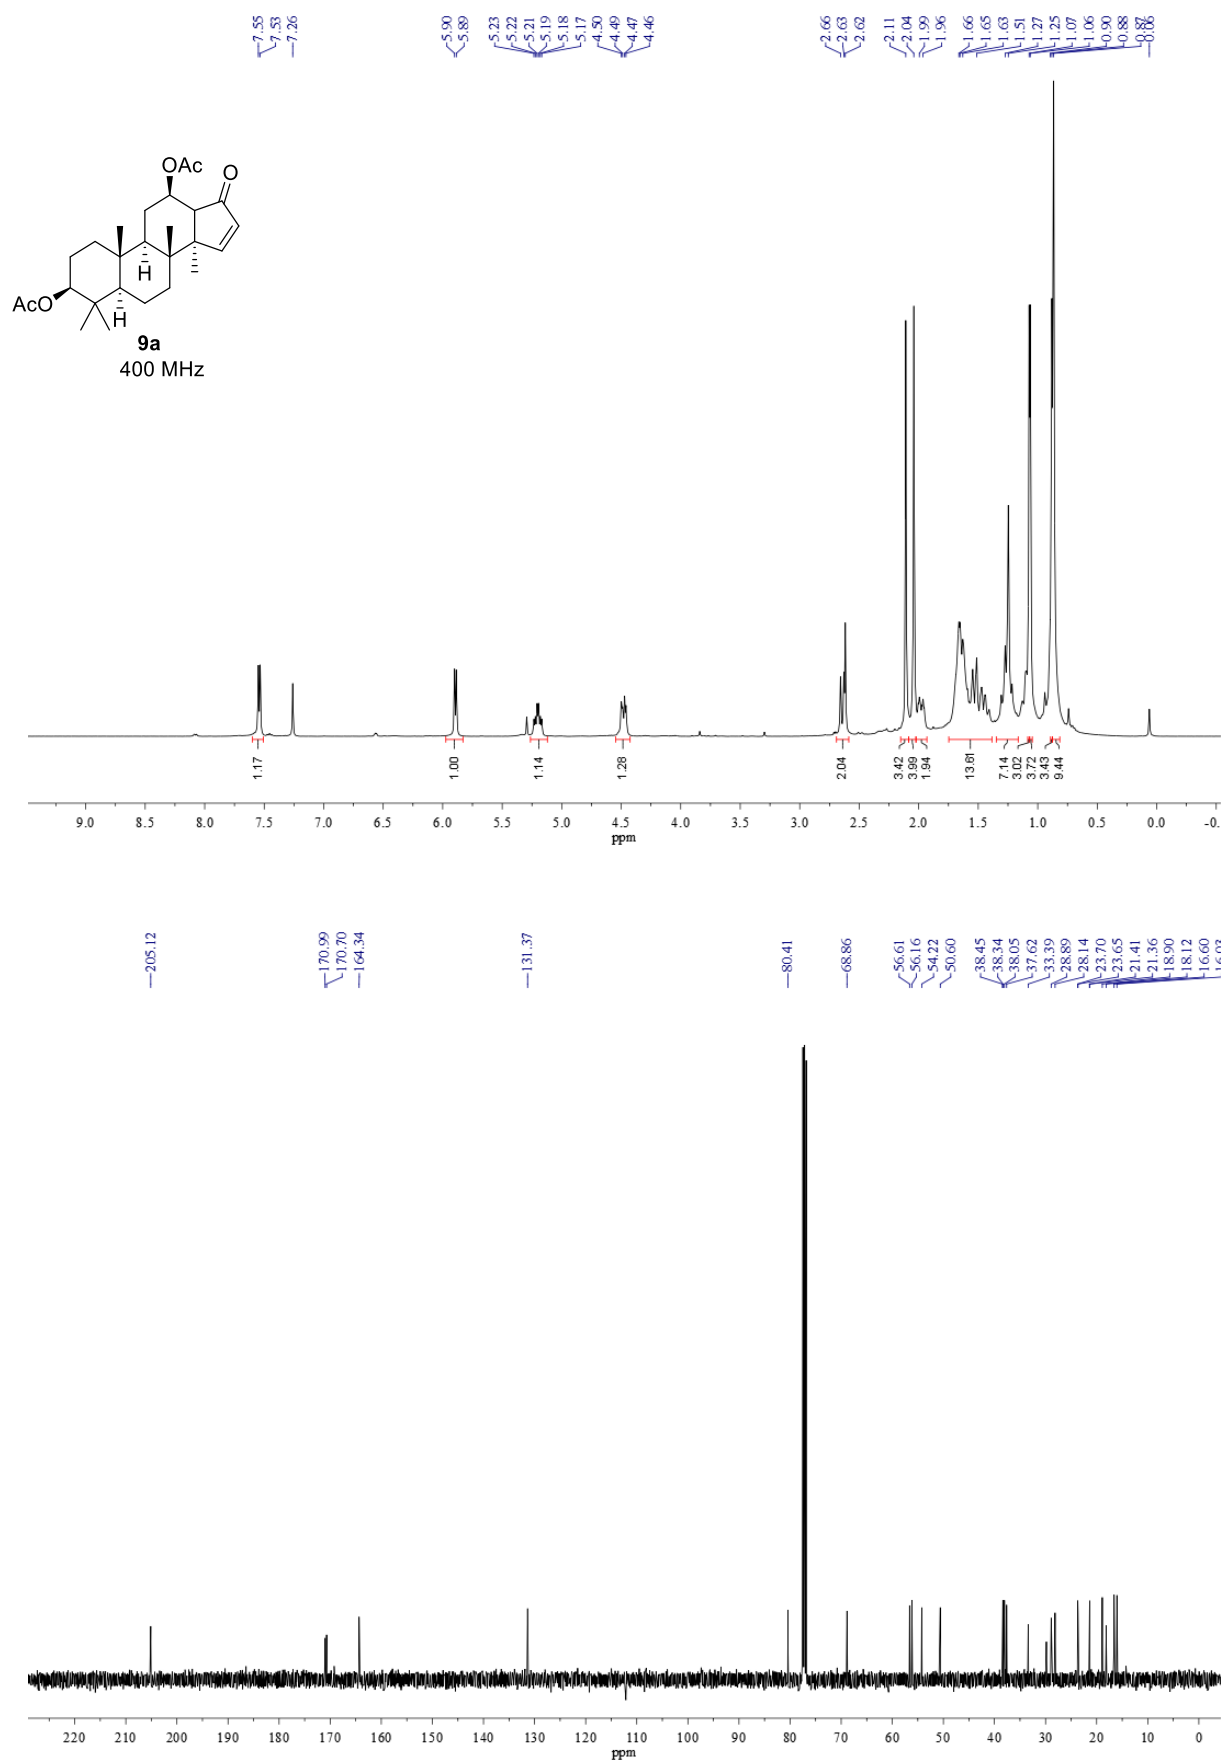

# Supporting Information

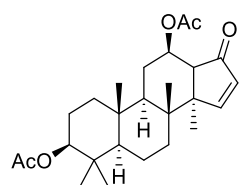

**9a**  
400 MHz

**COSY**

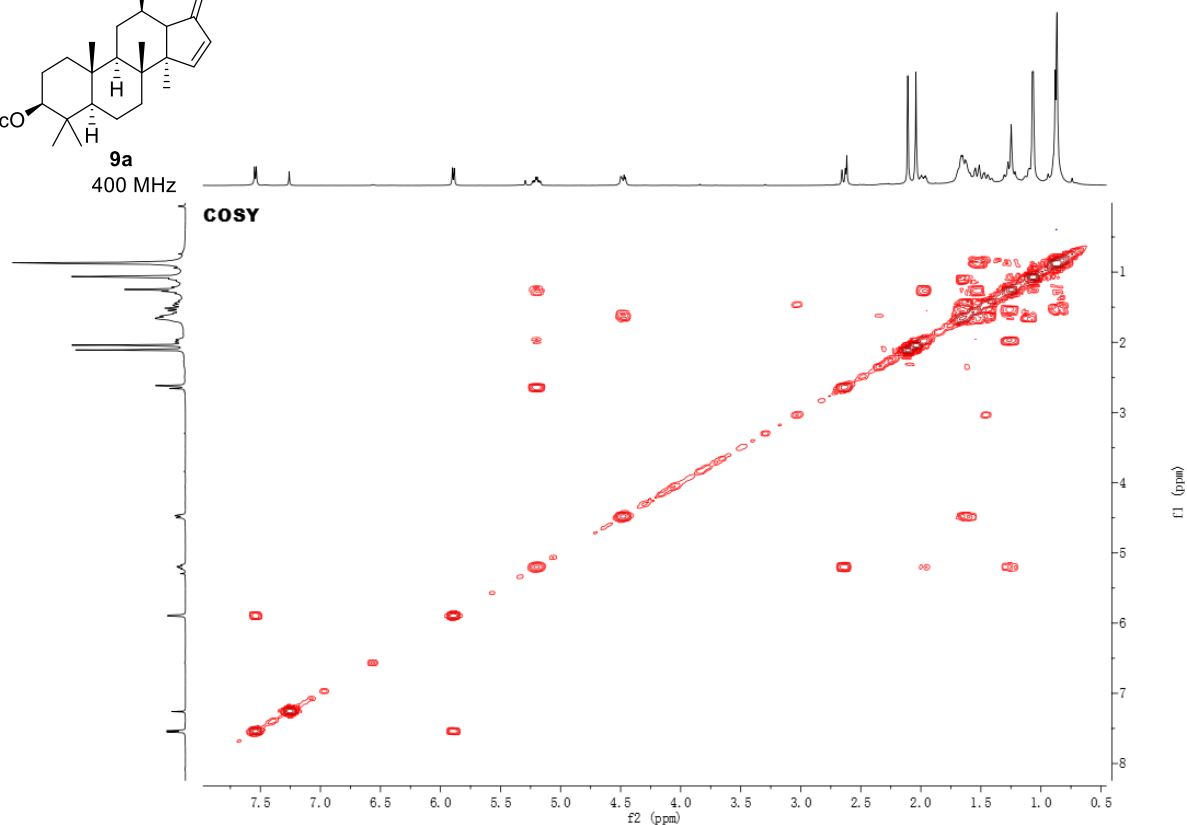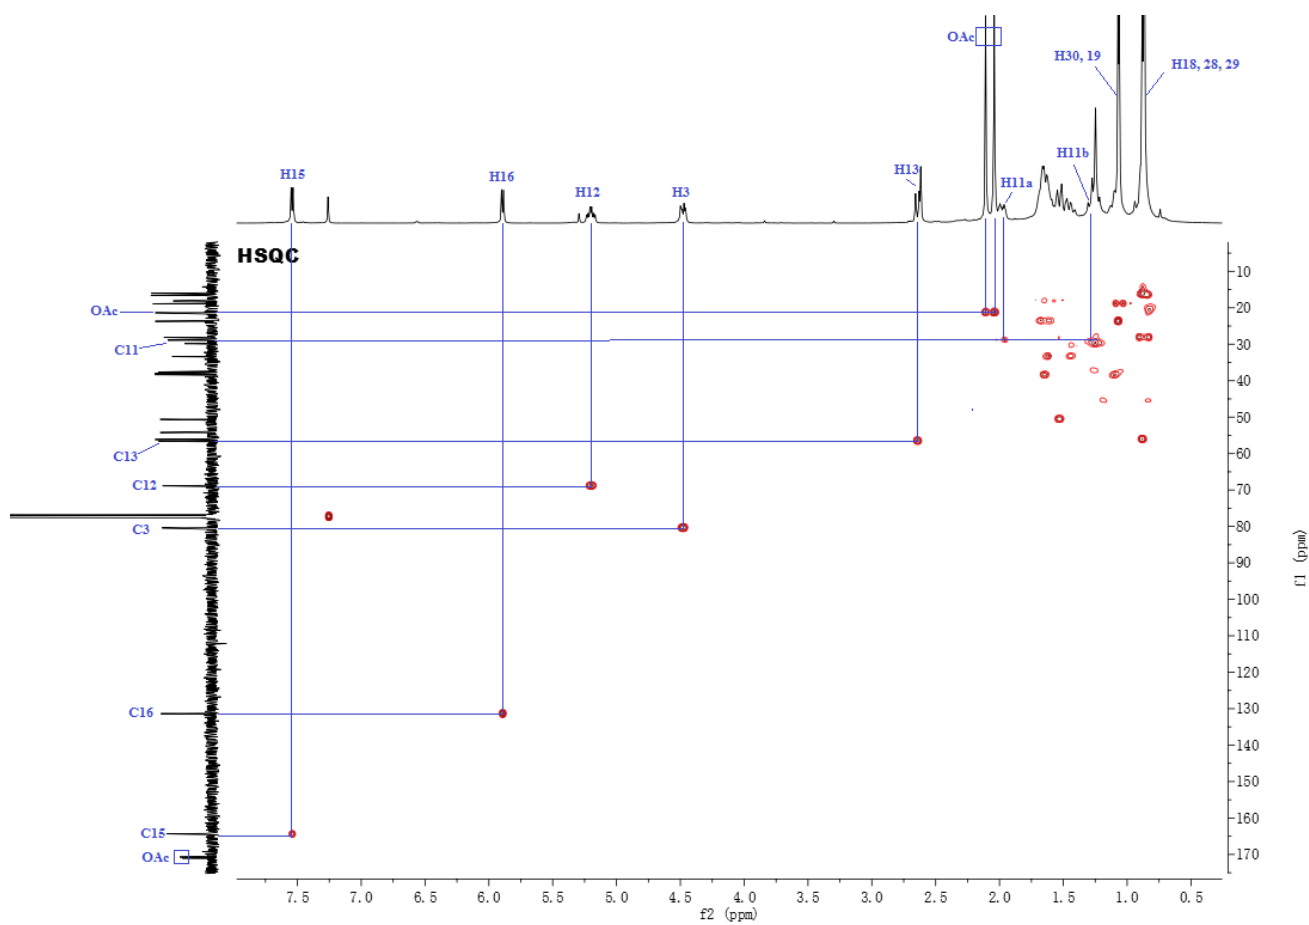

Supporting Information

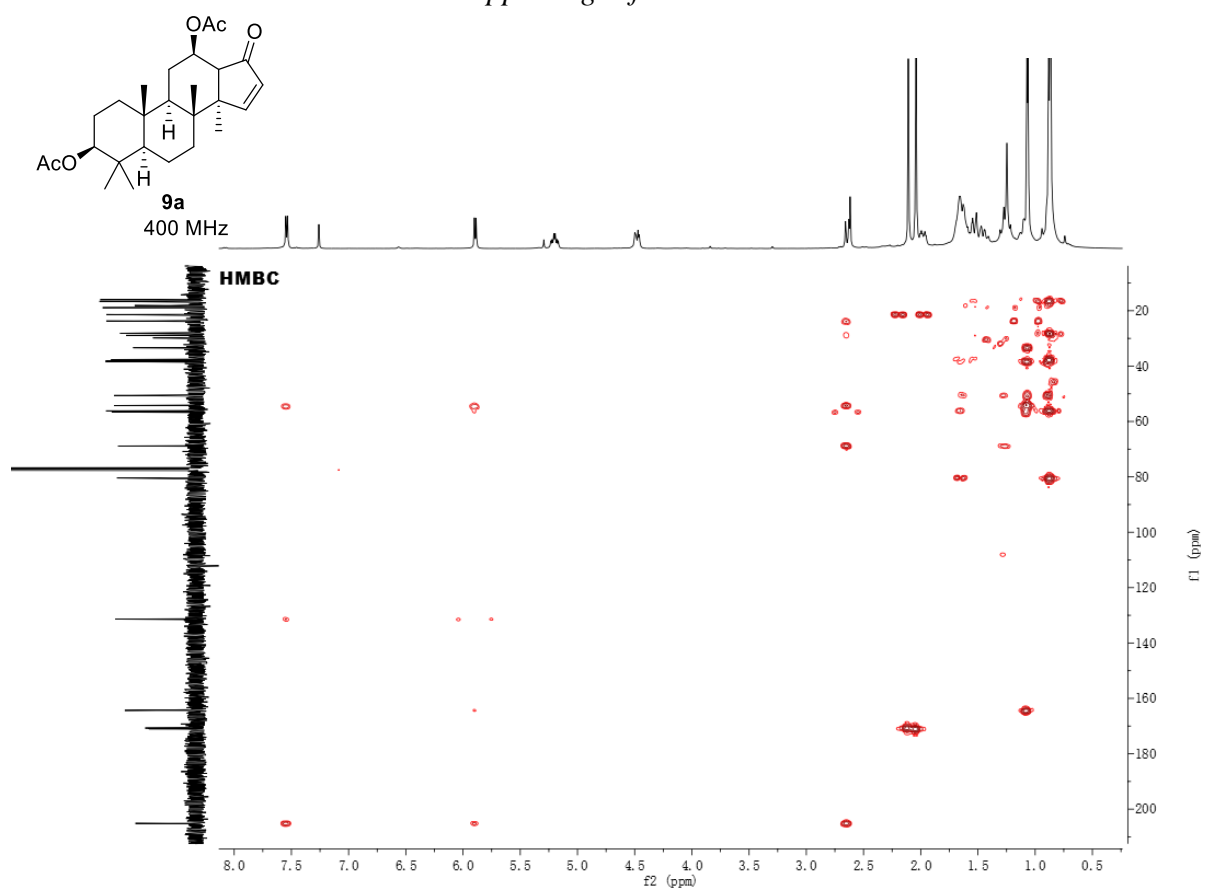

# Supporting Information

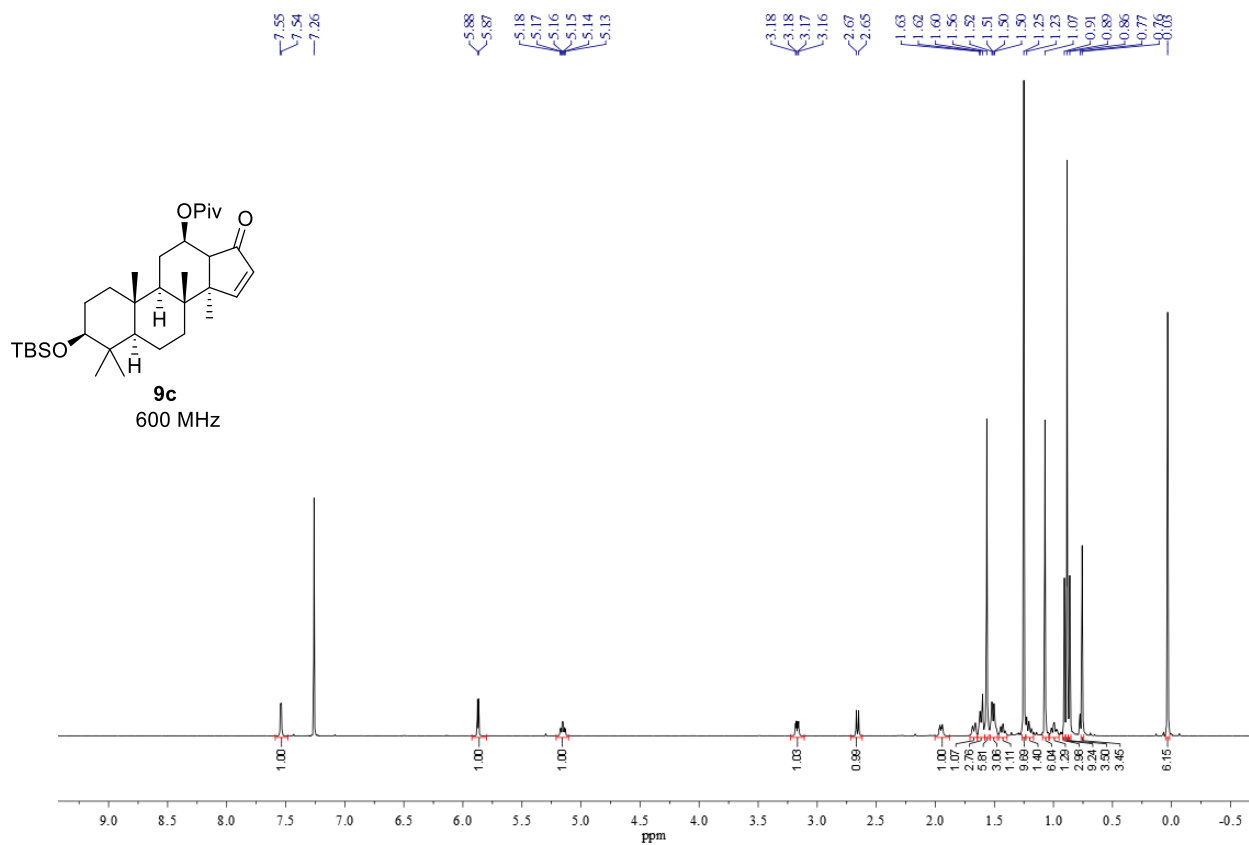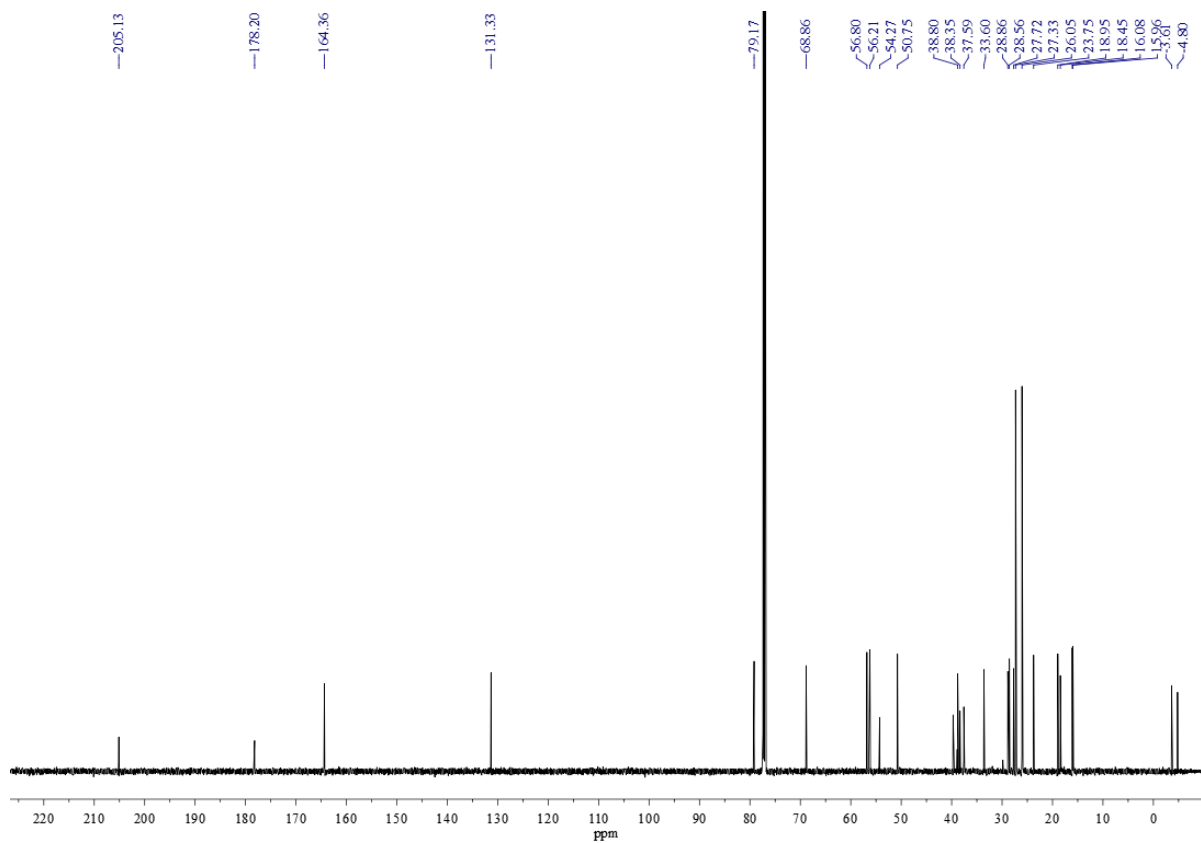

# Supporting Information

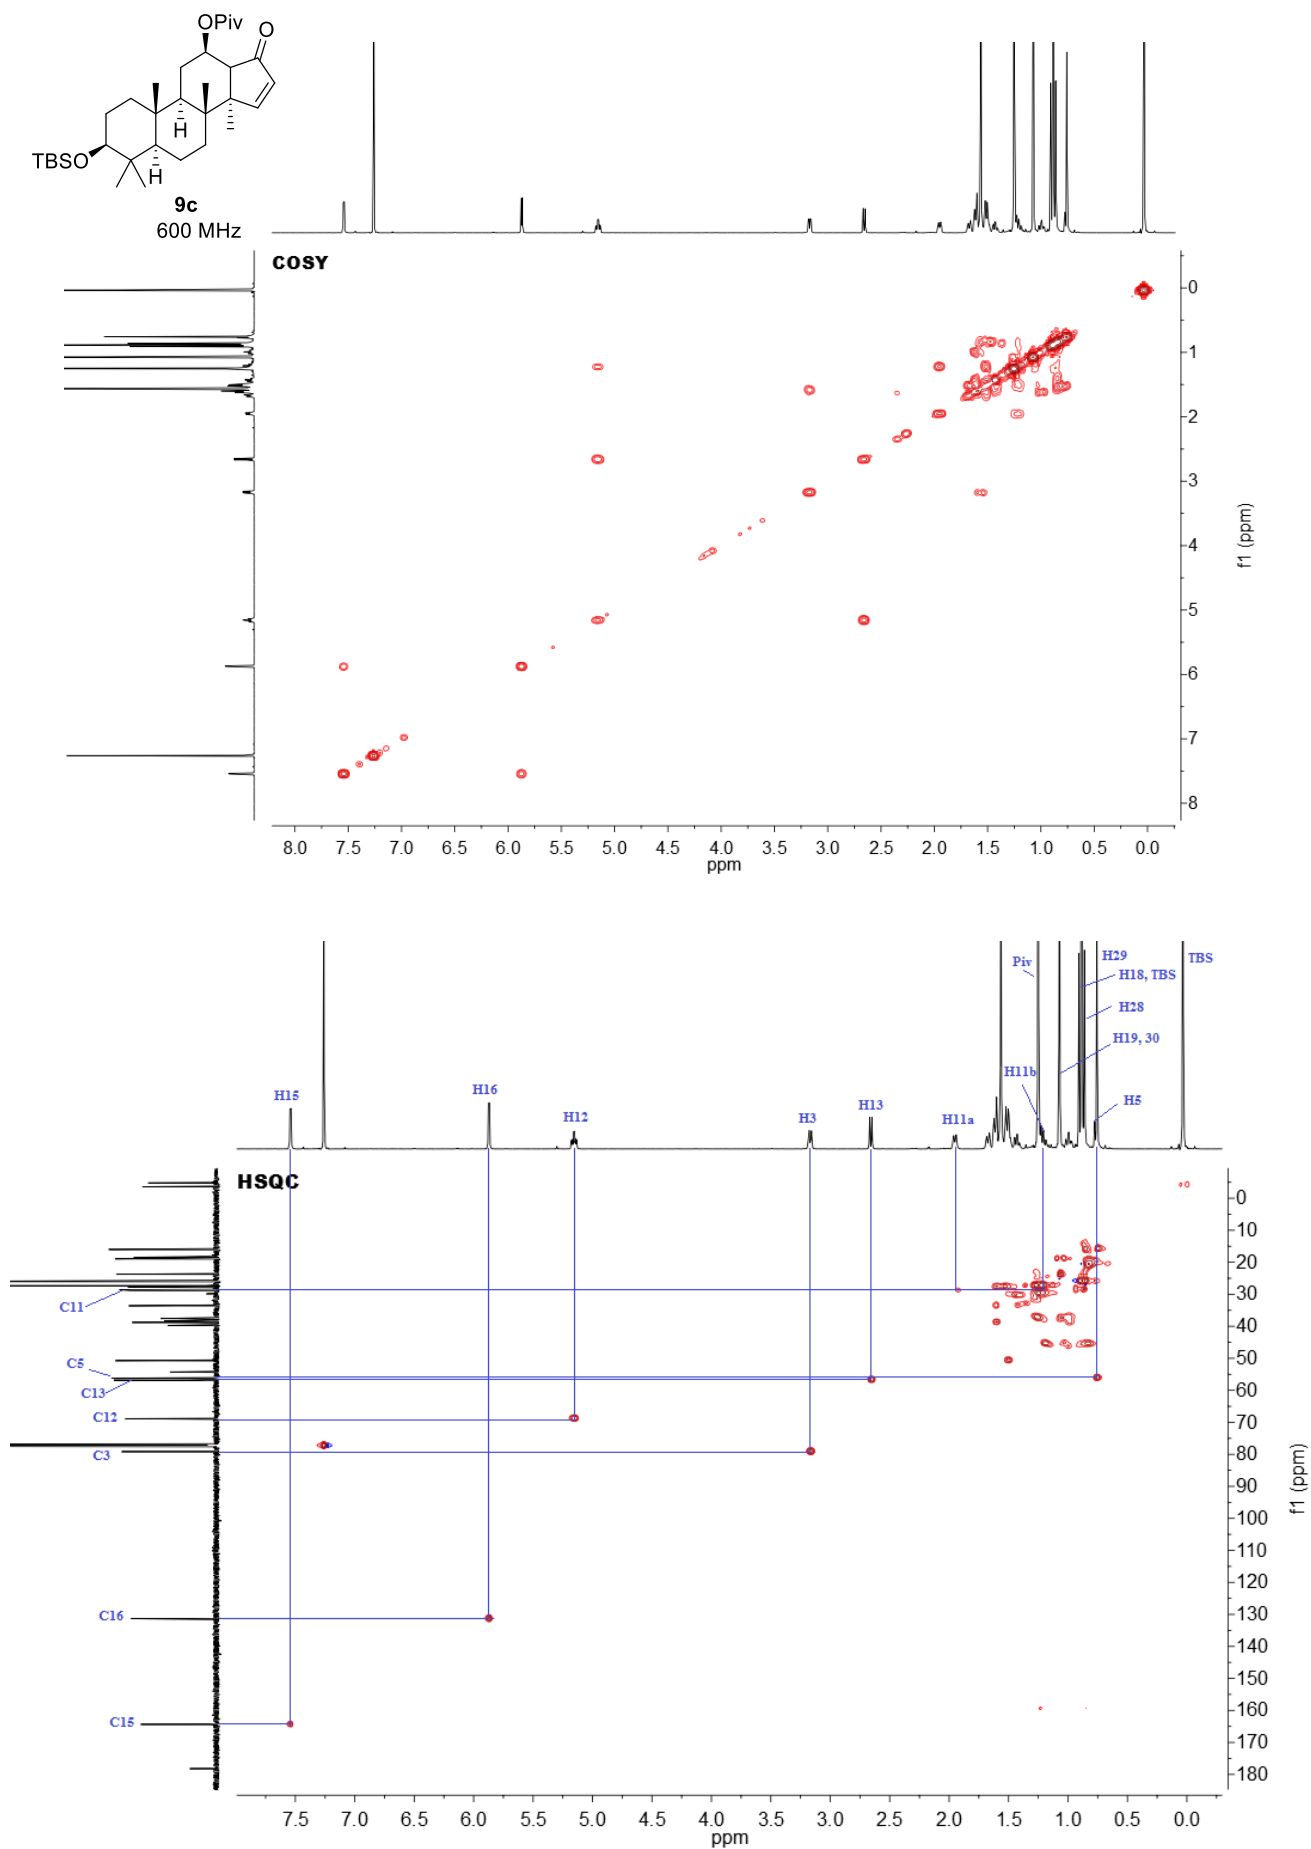



# Supporting Information

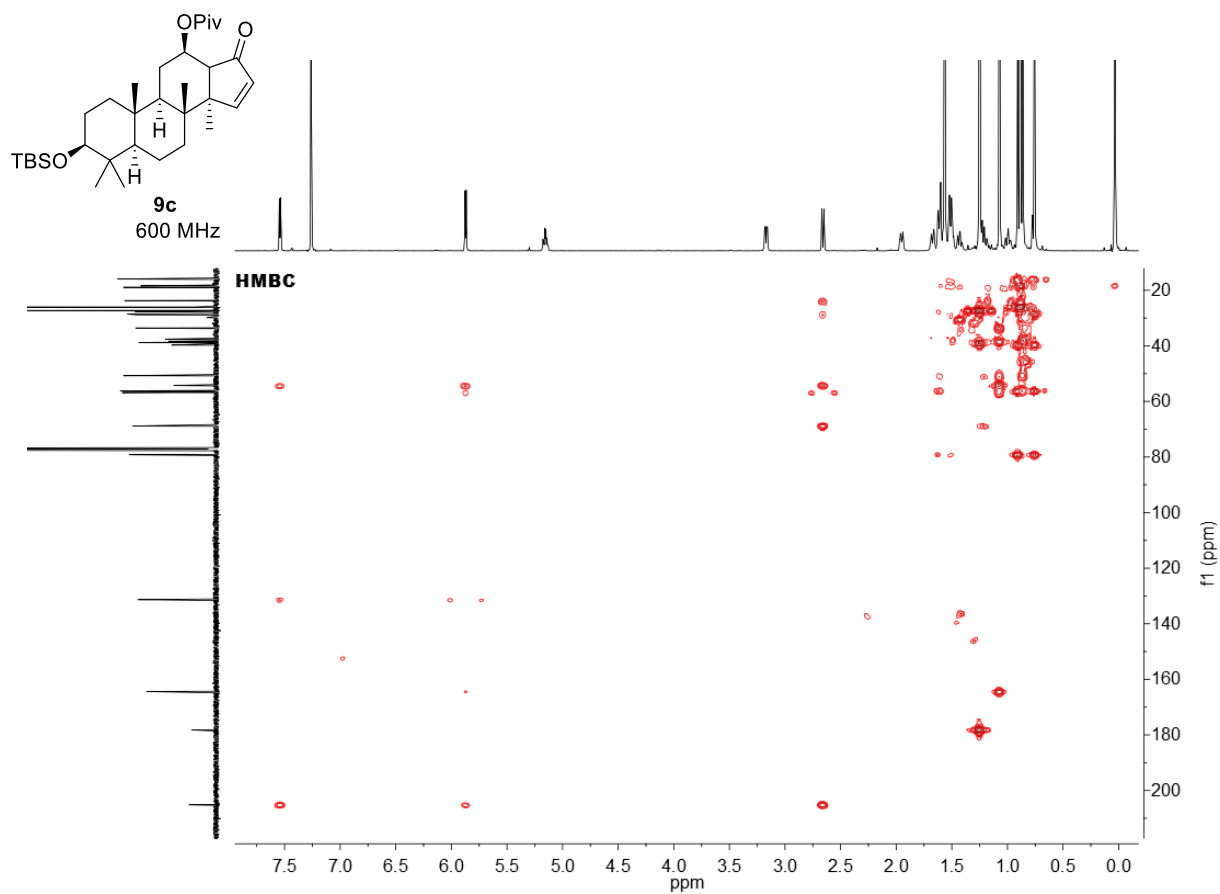

# Supporting Information

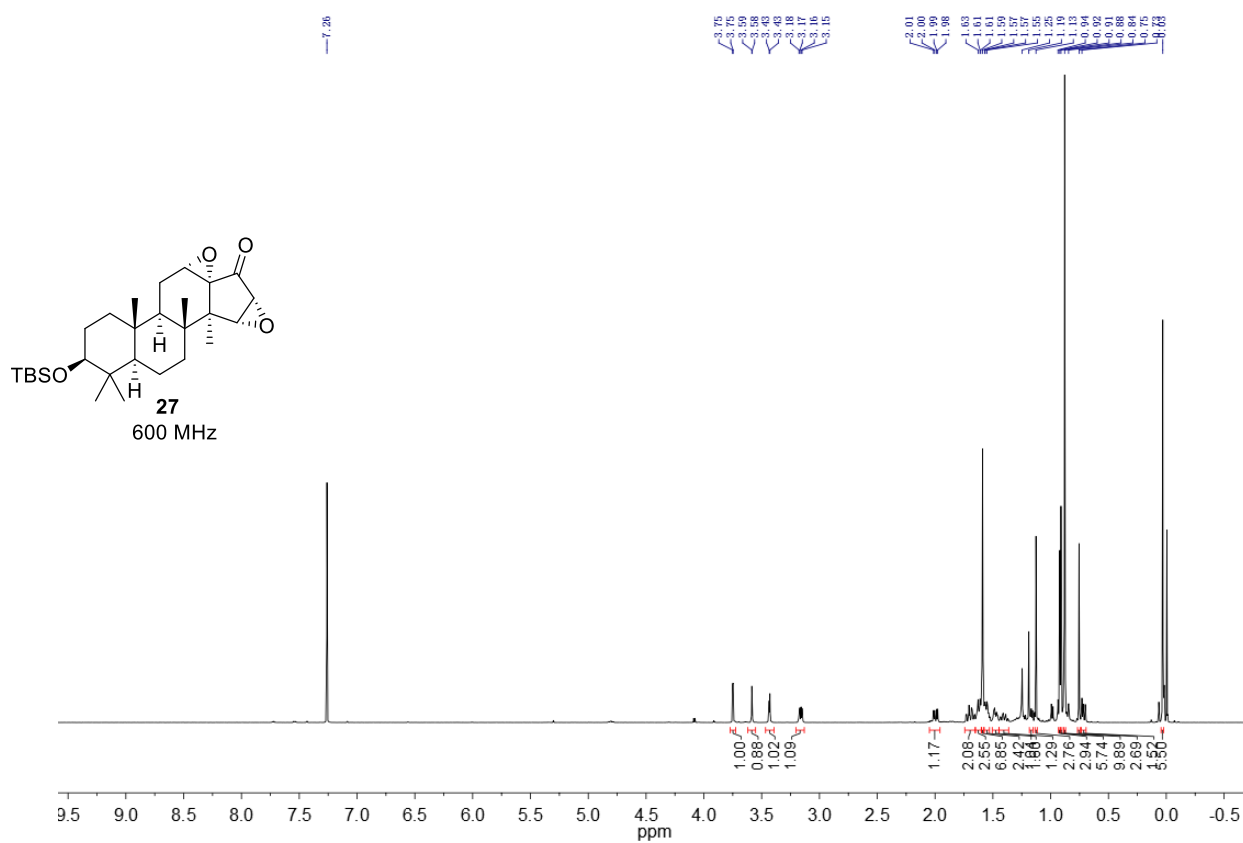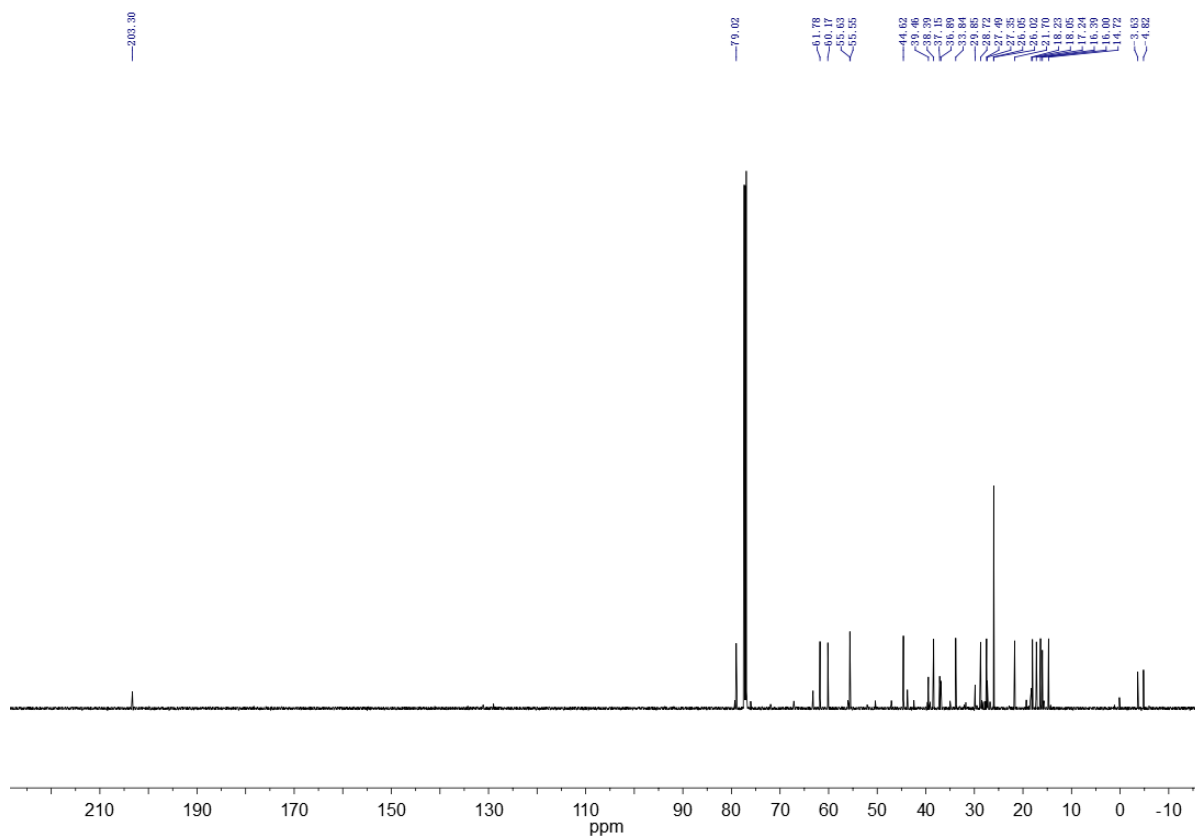

# Supporting Information

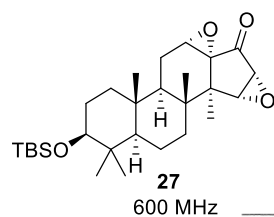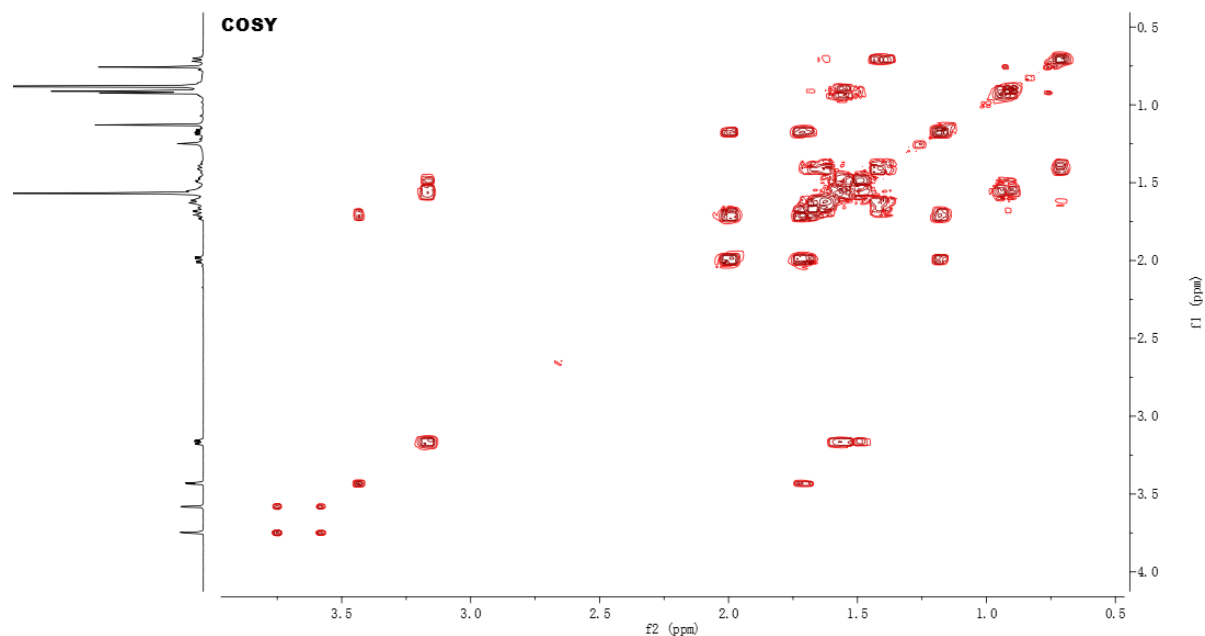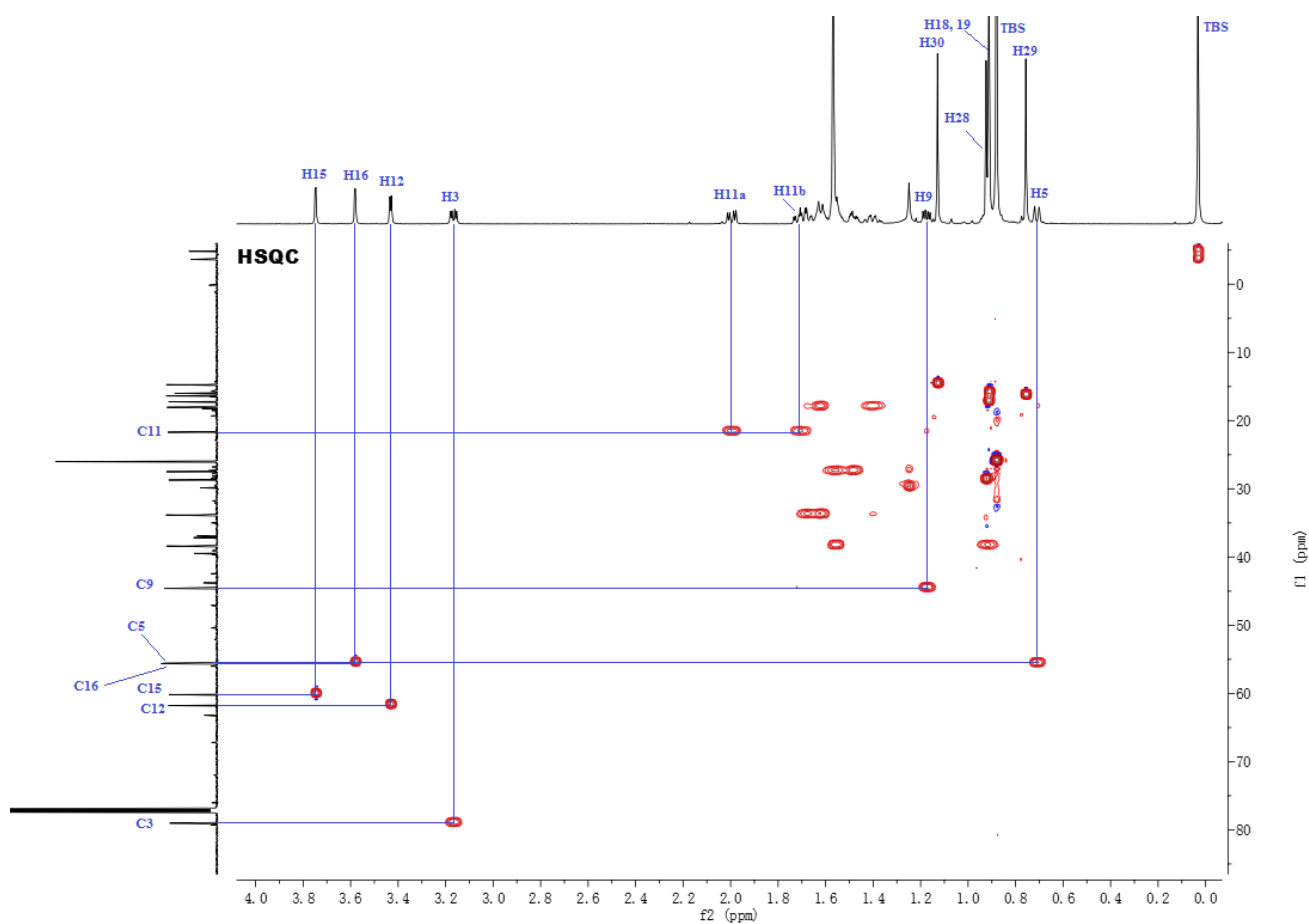

# Supporting Information

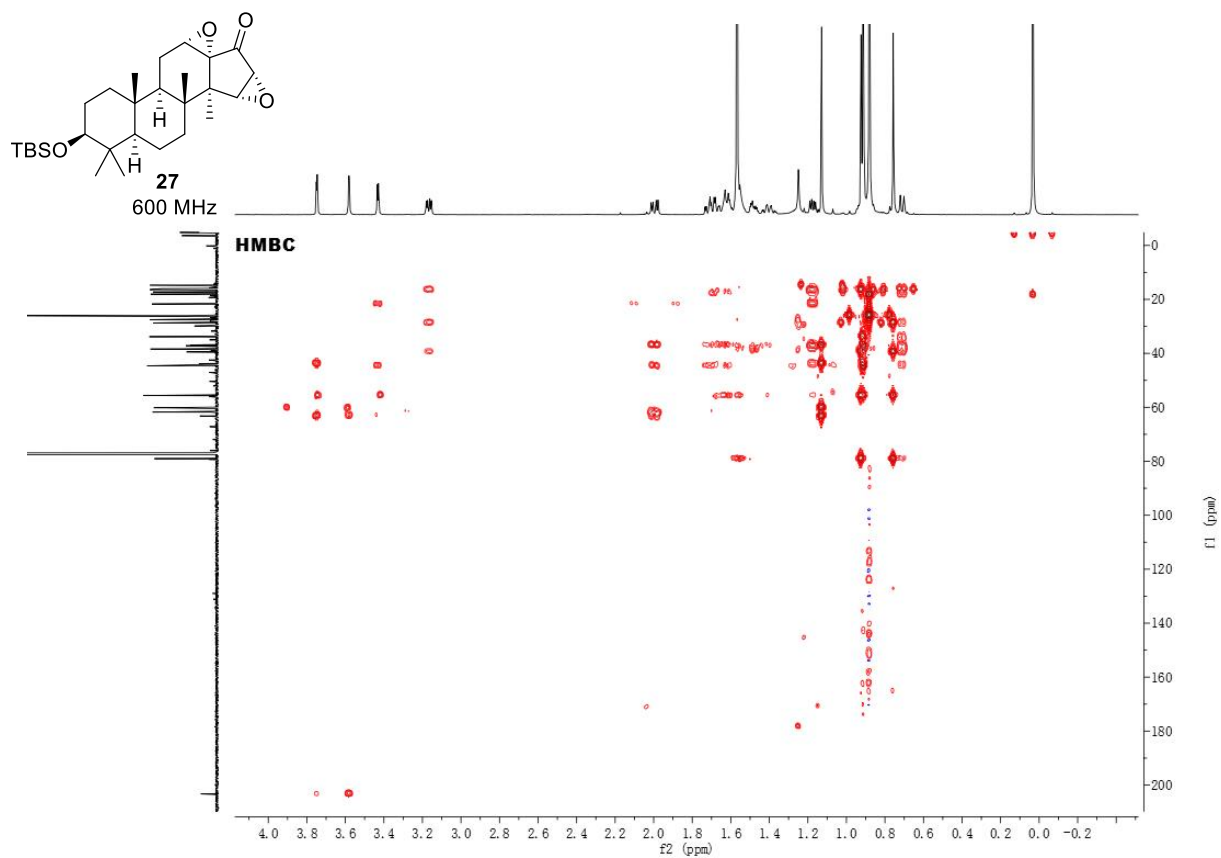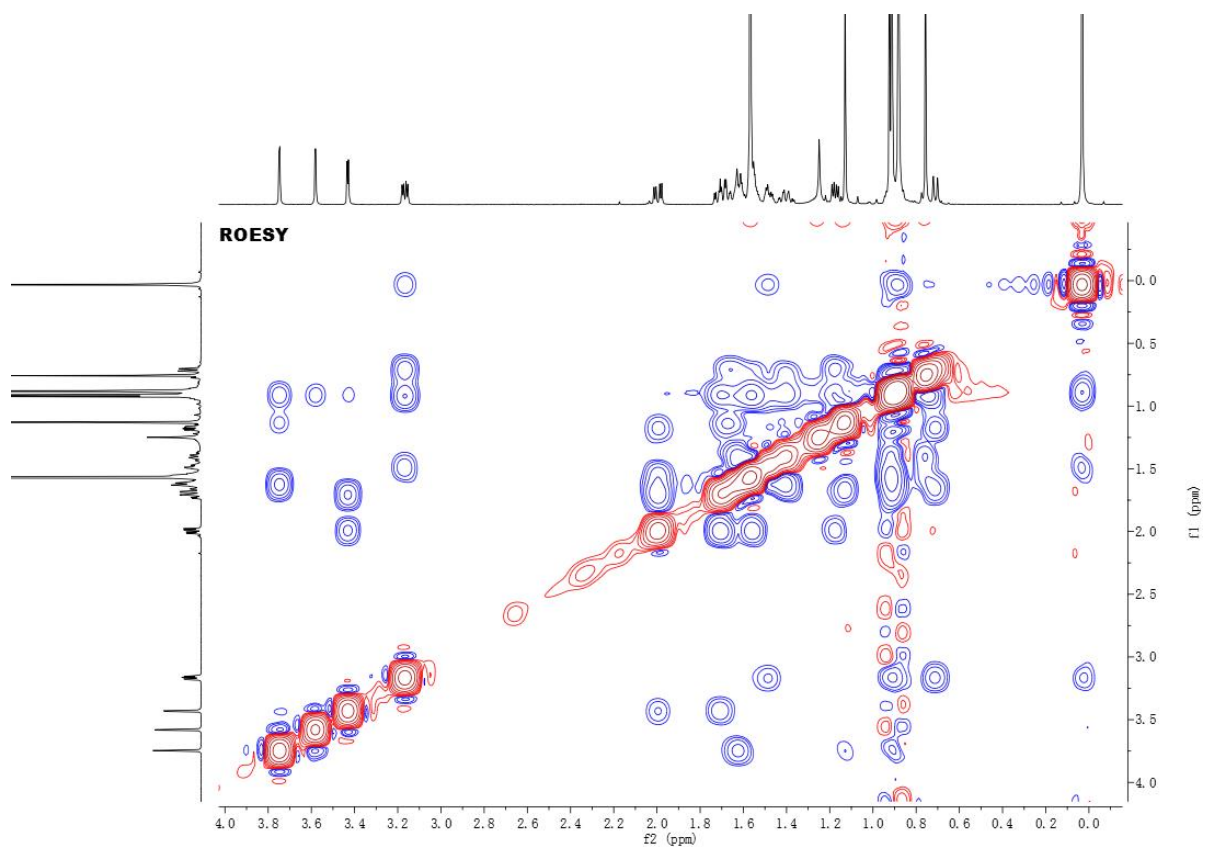

# Supporting Information

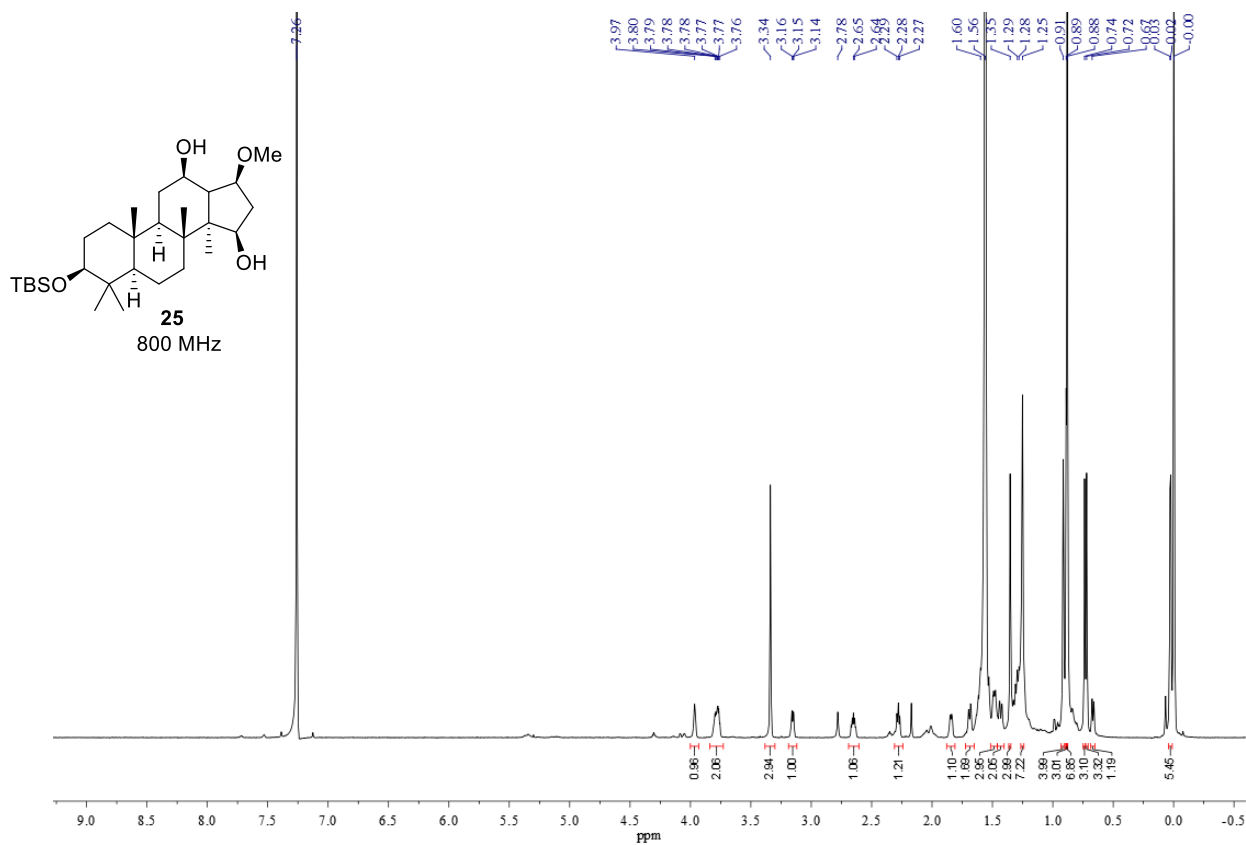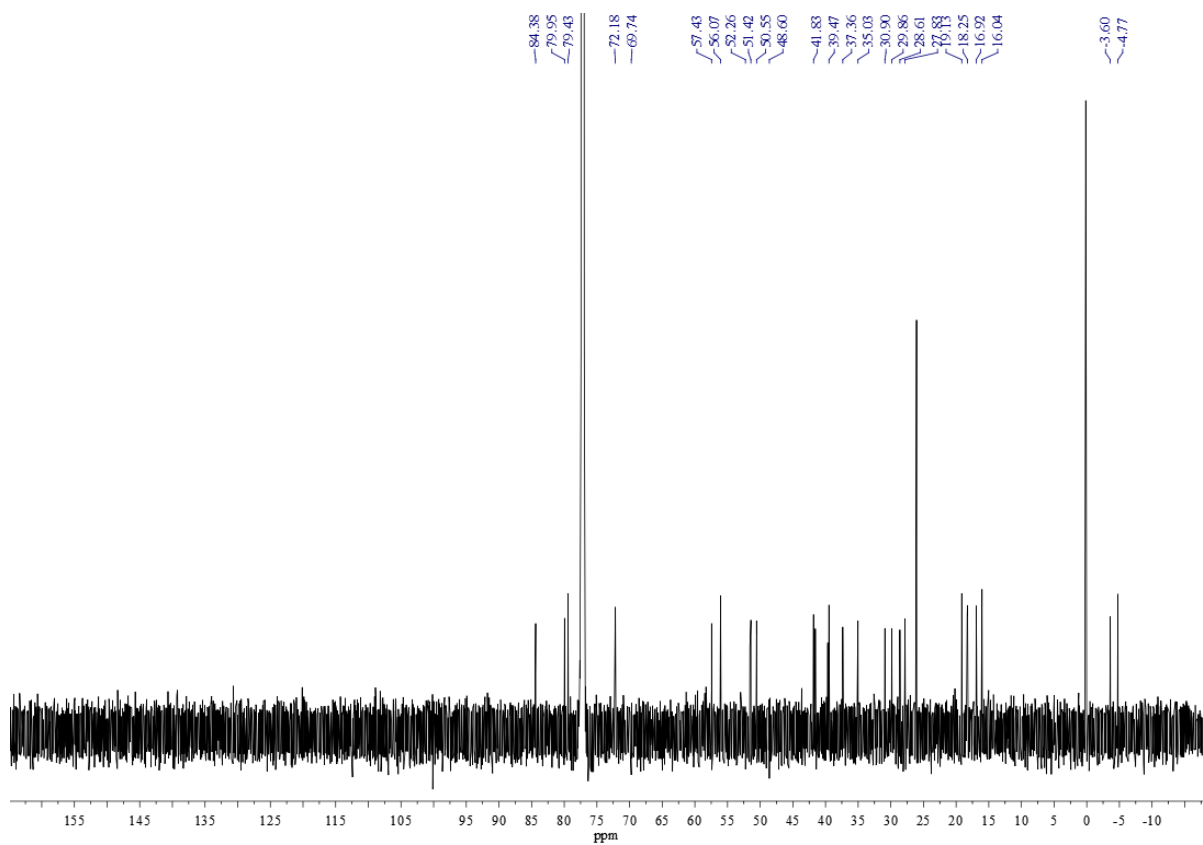

# Supporting Information

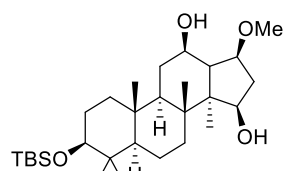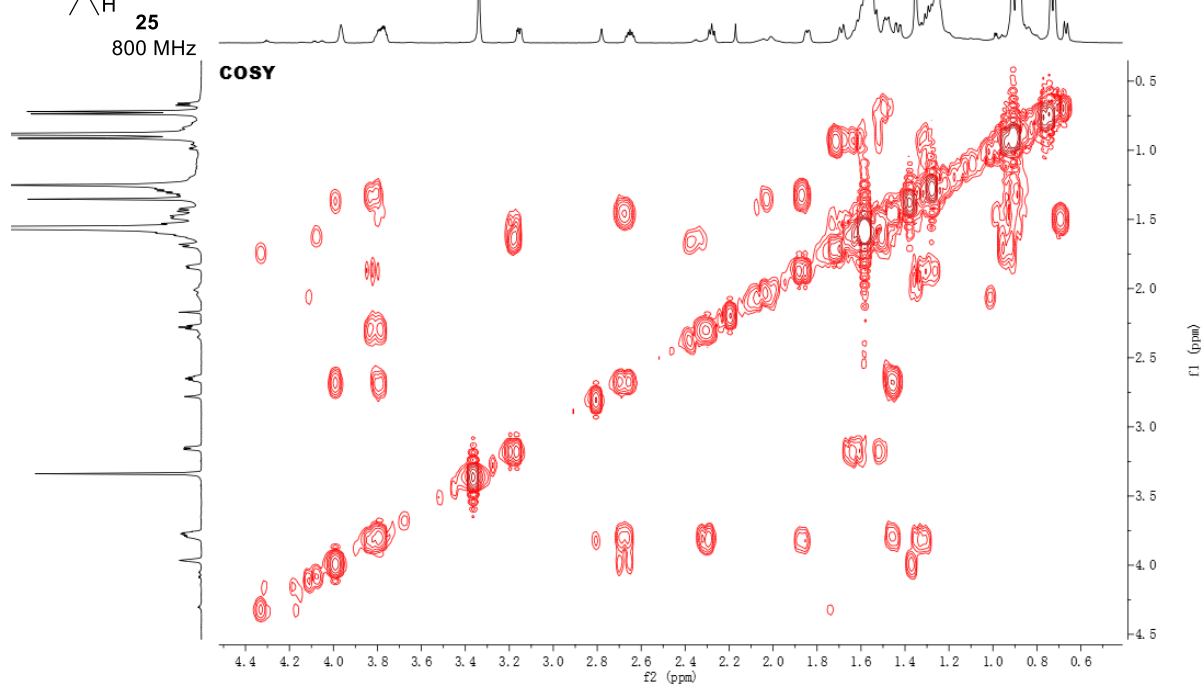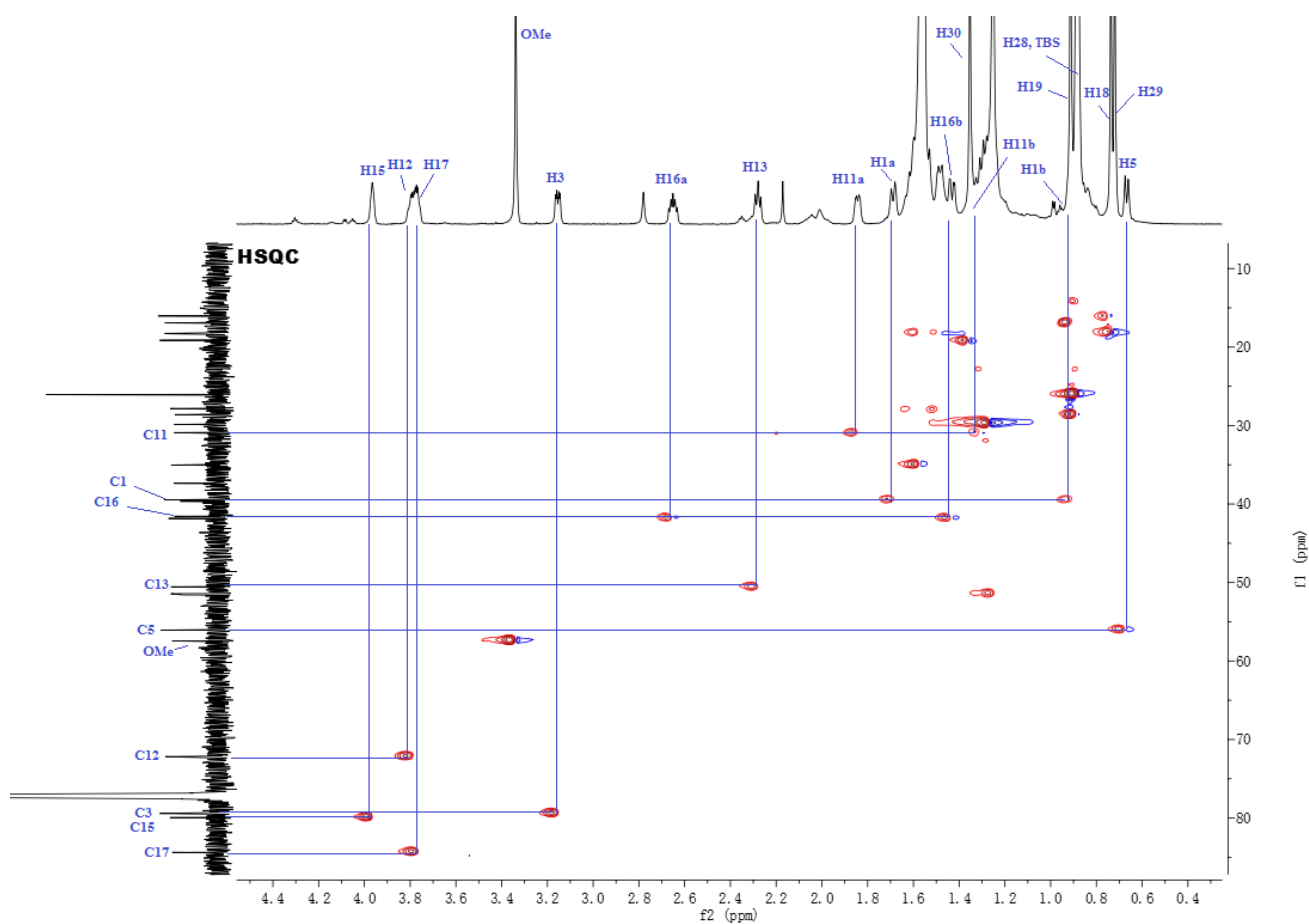

# Supporting Information

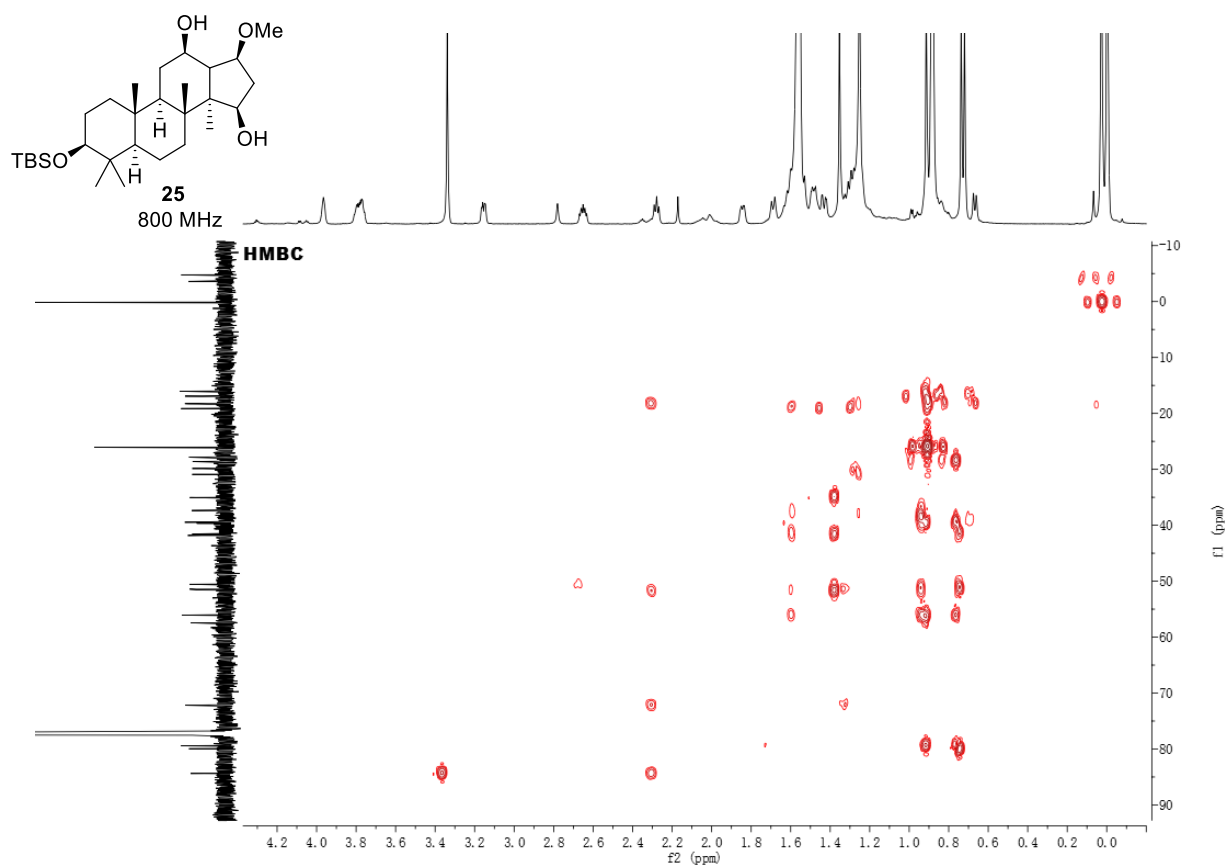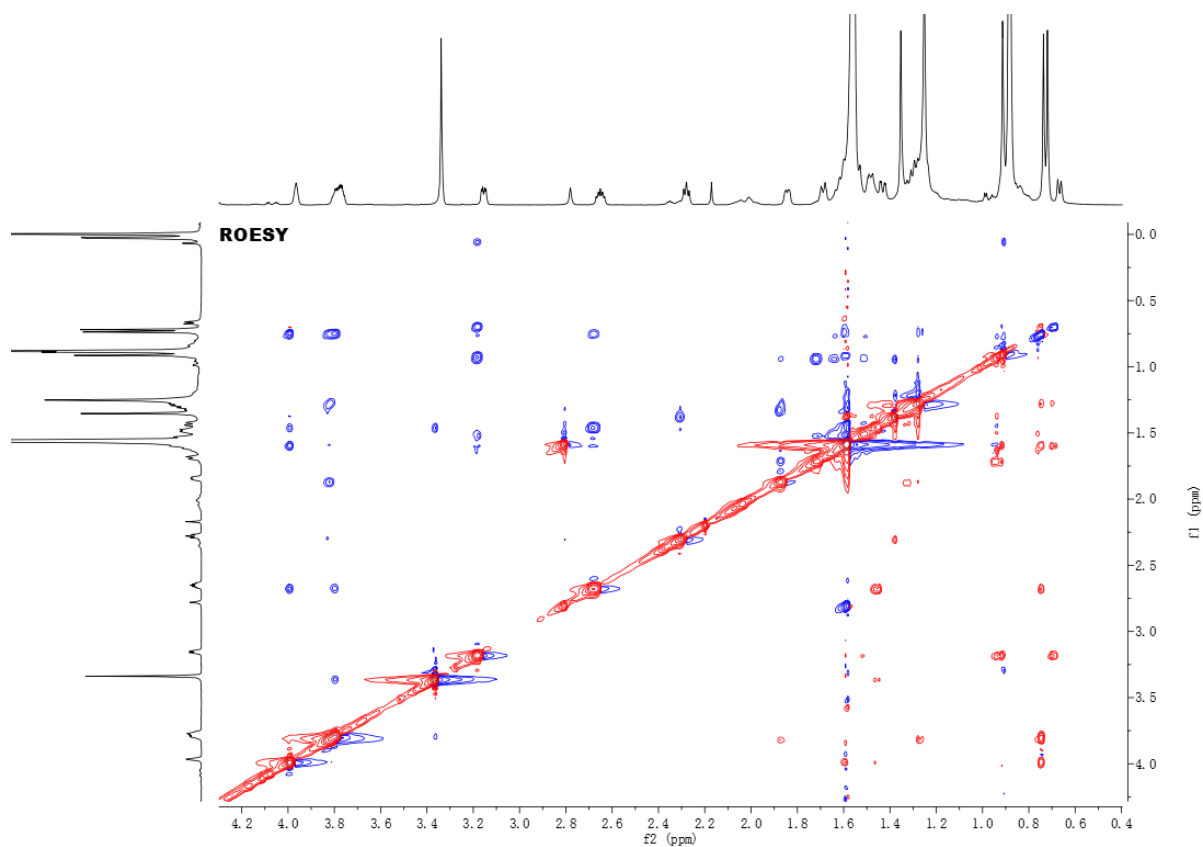

## Supporting Information

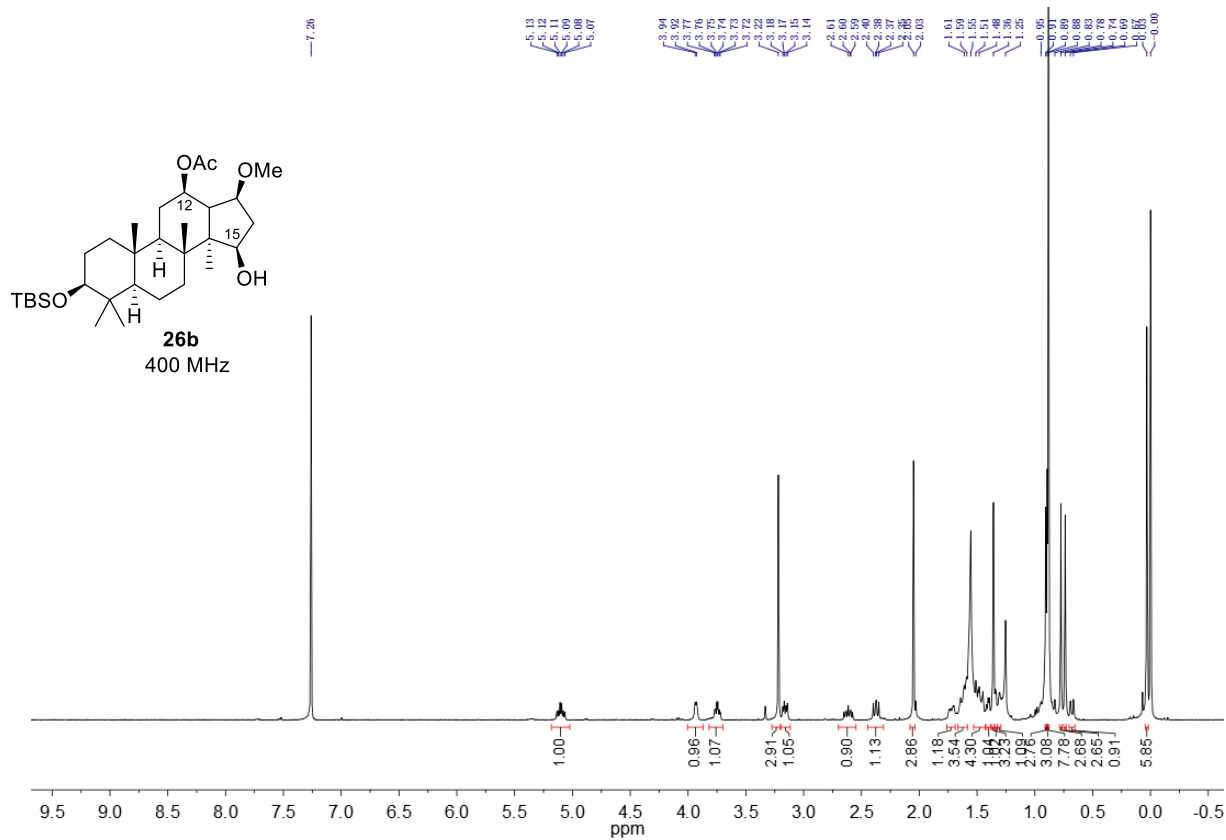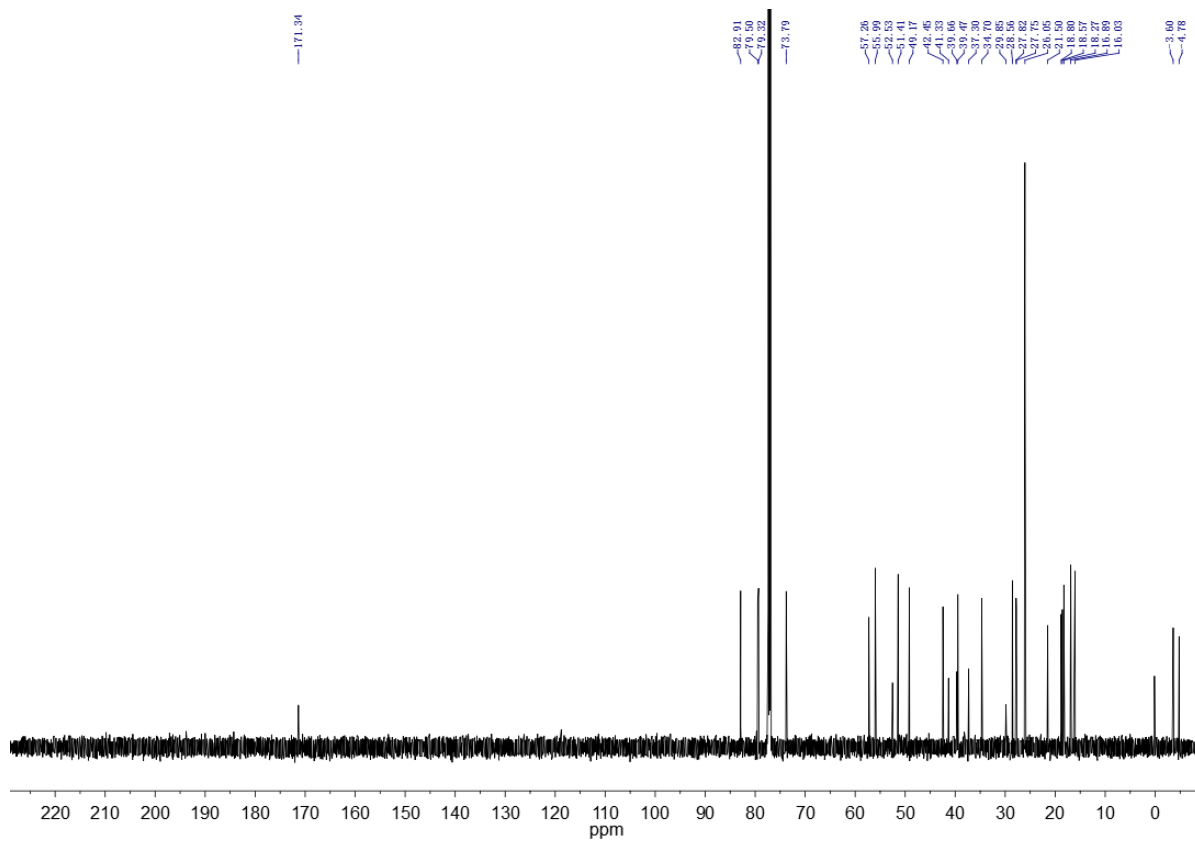



# Supporting Information

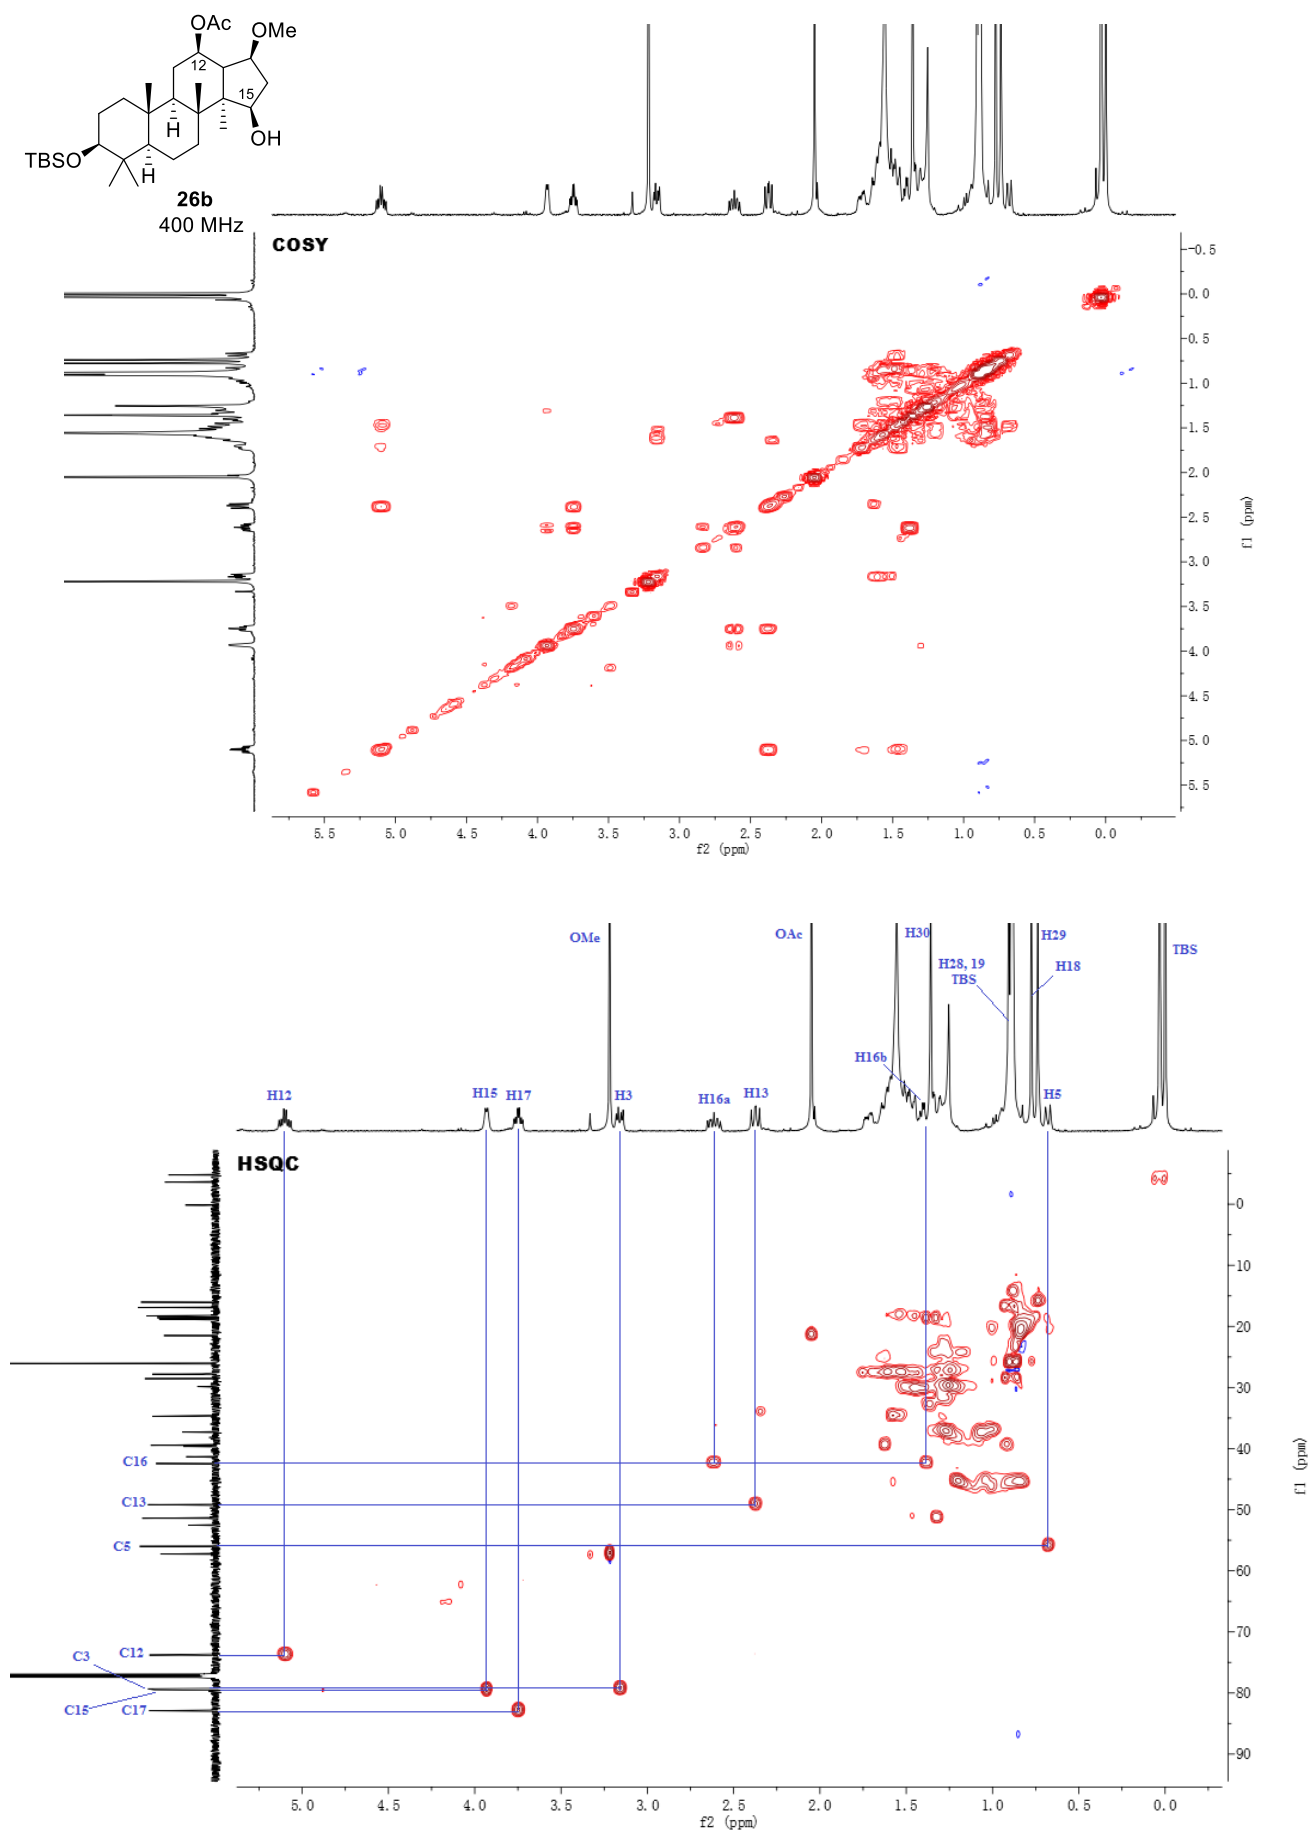

# Supporting Information

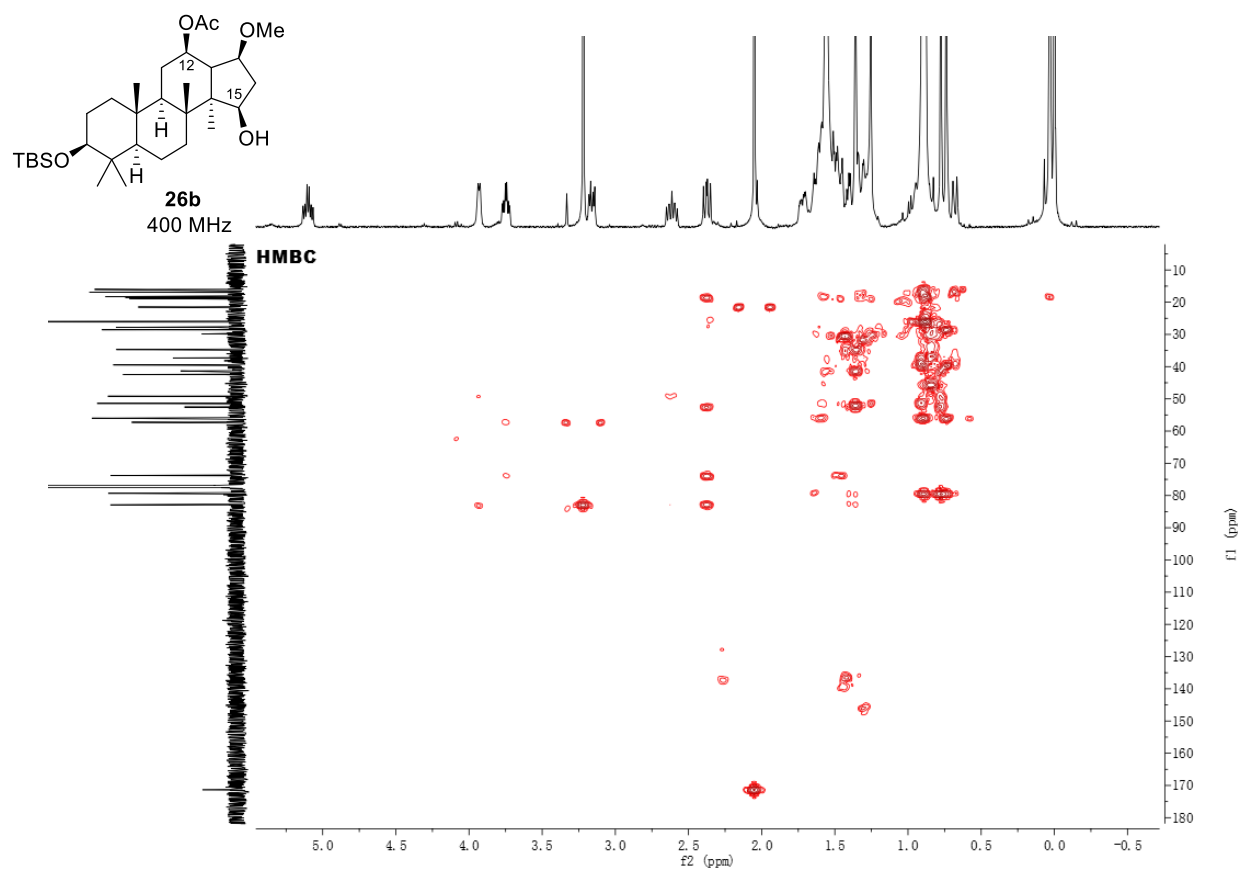

# Supporting Information

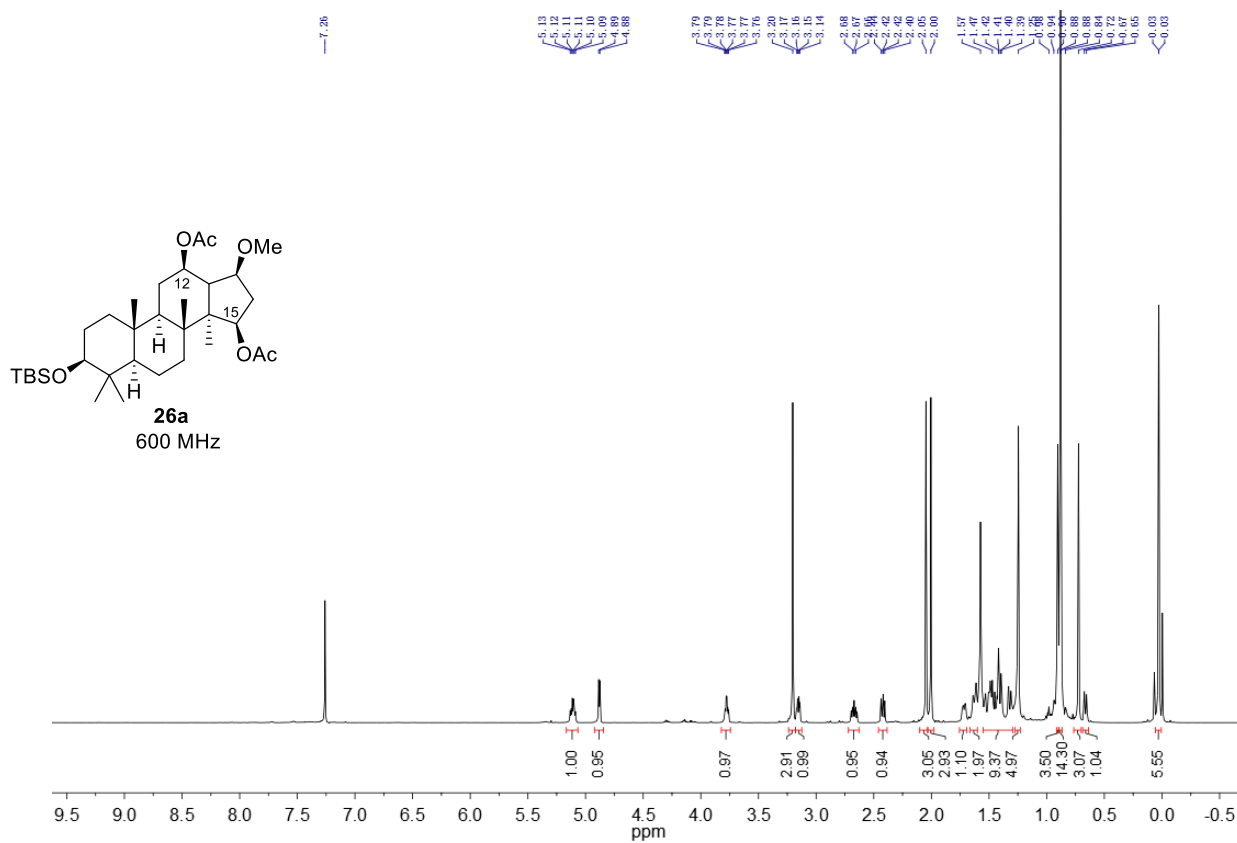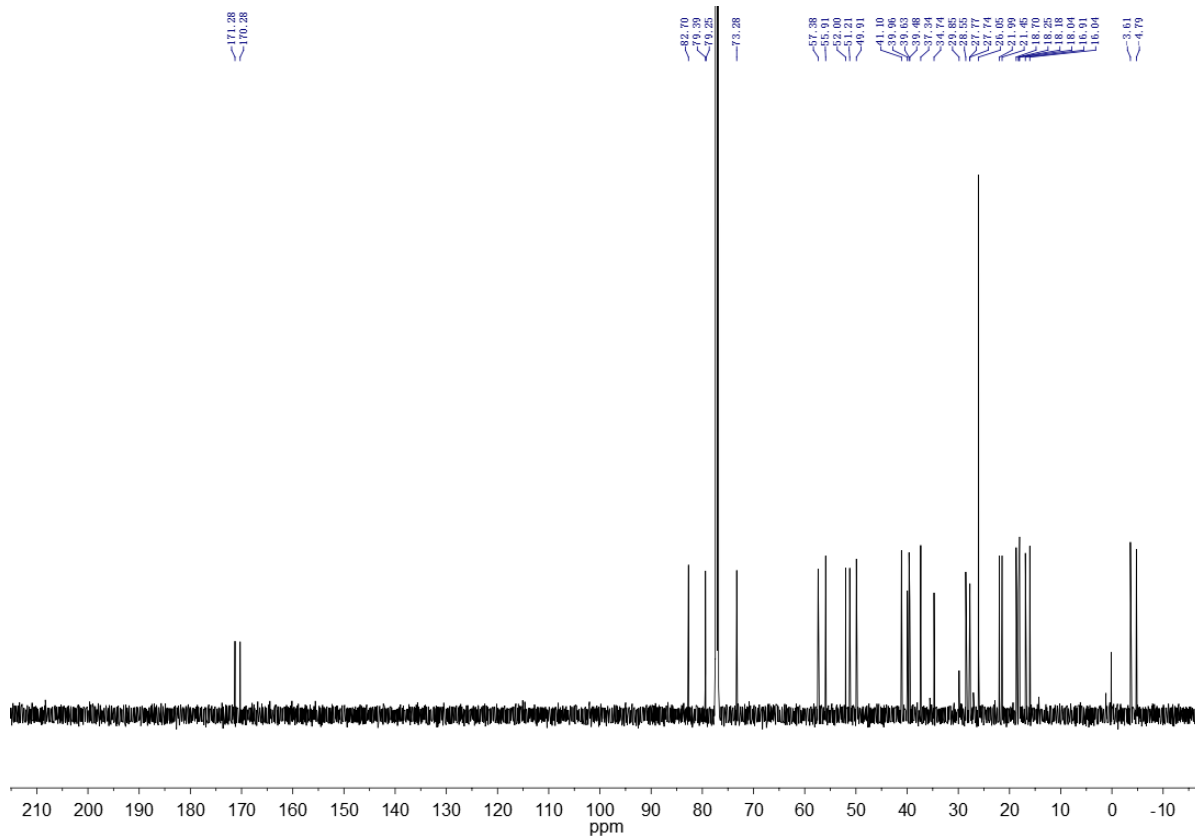

# Supporting Information

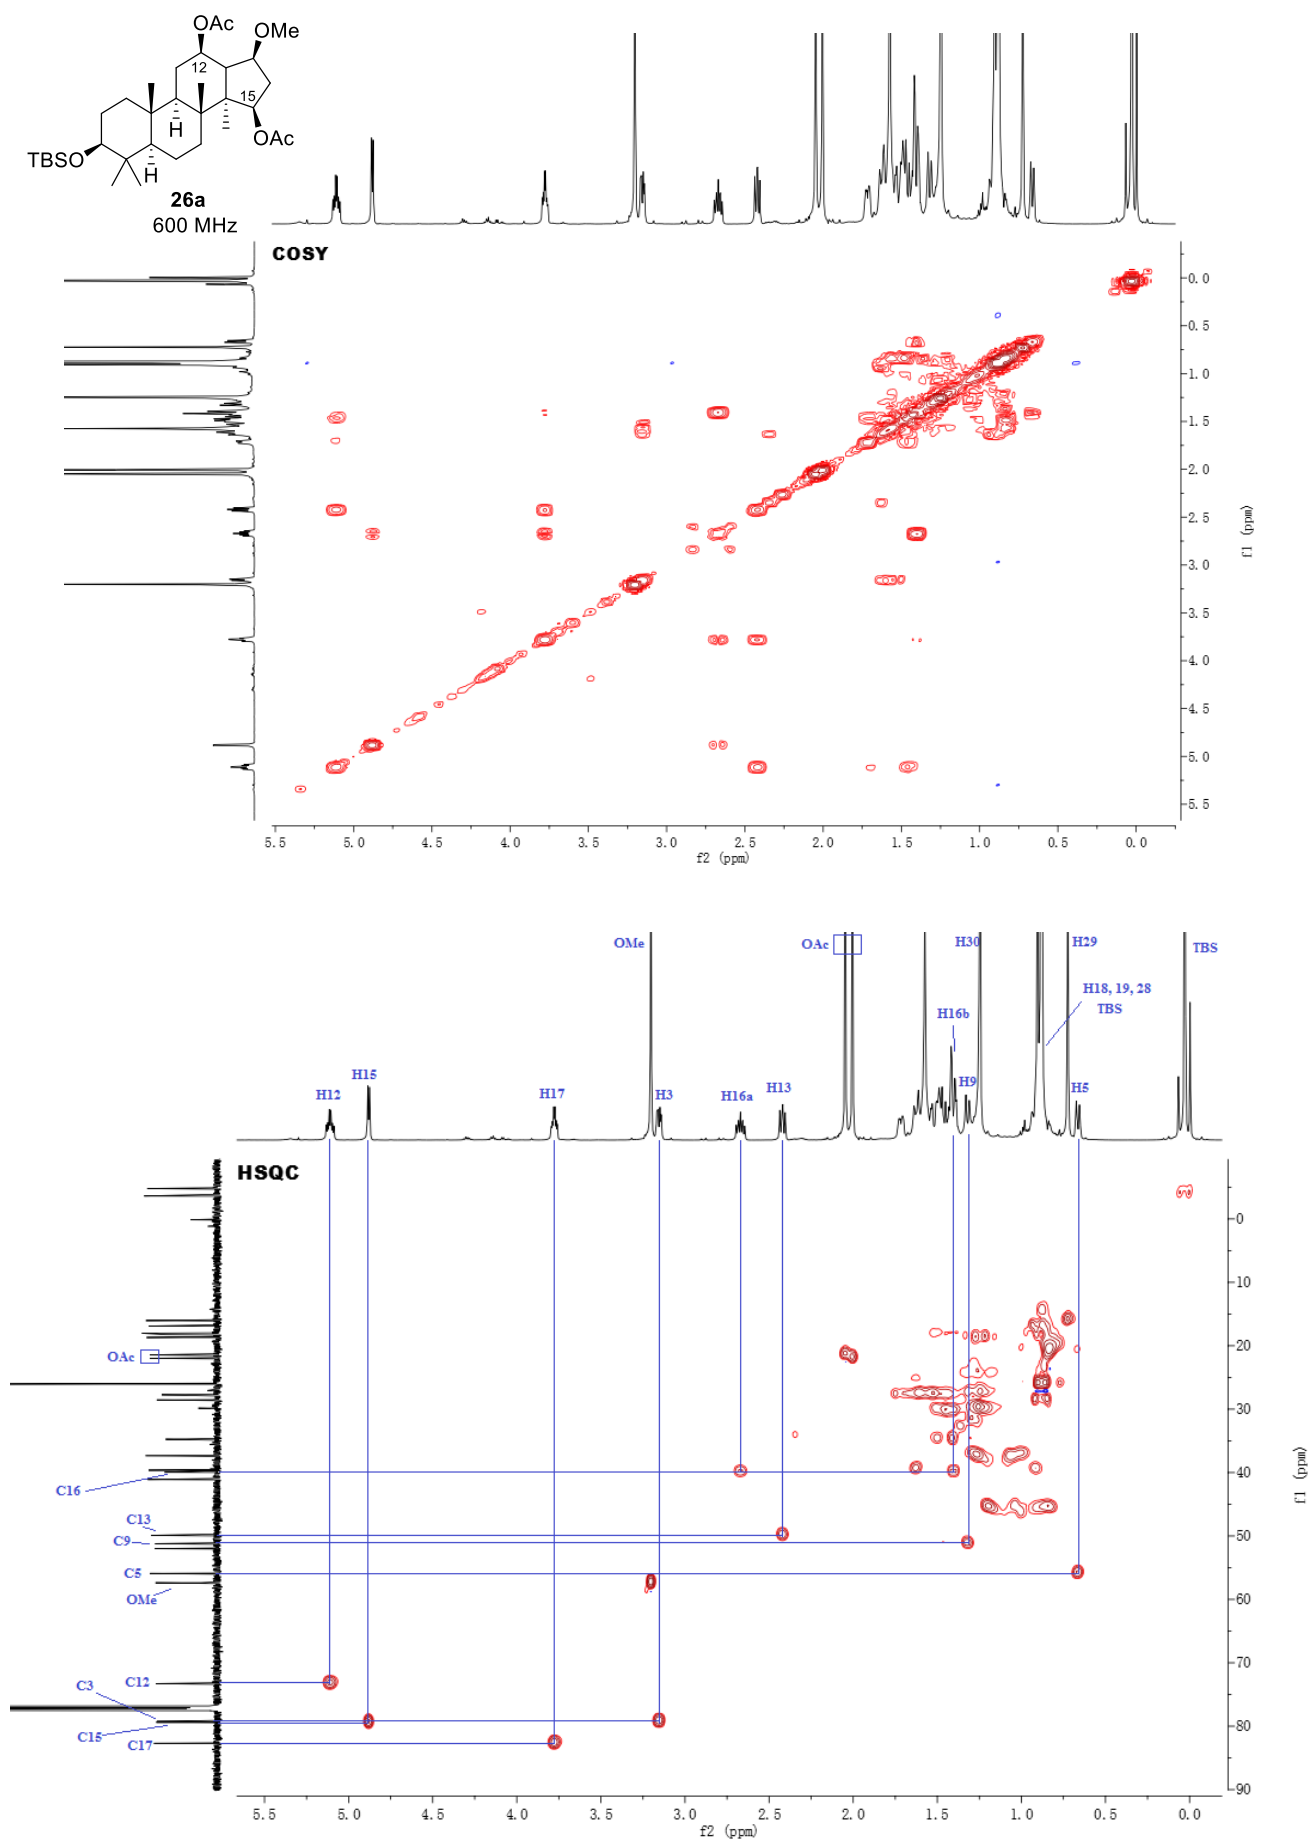

# Supporting Information

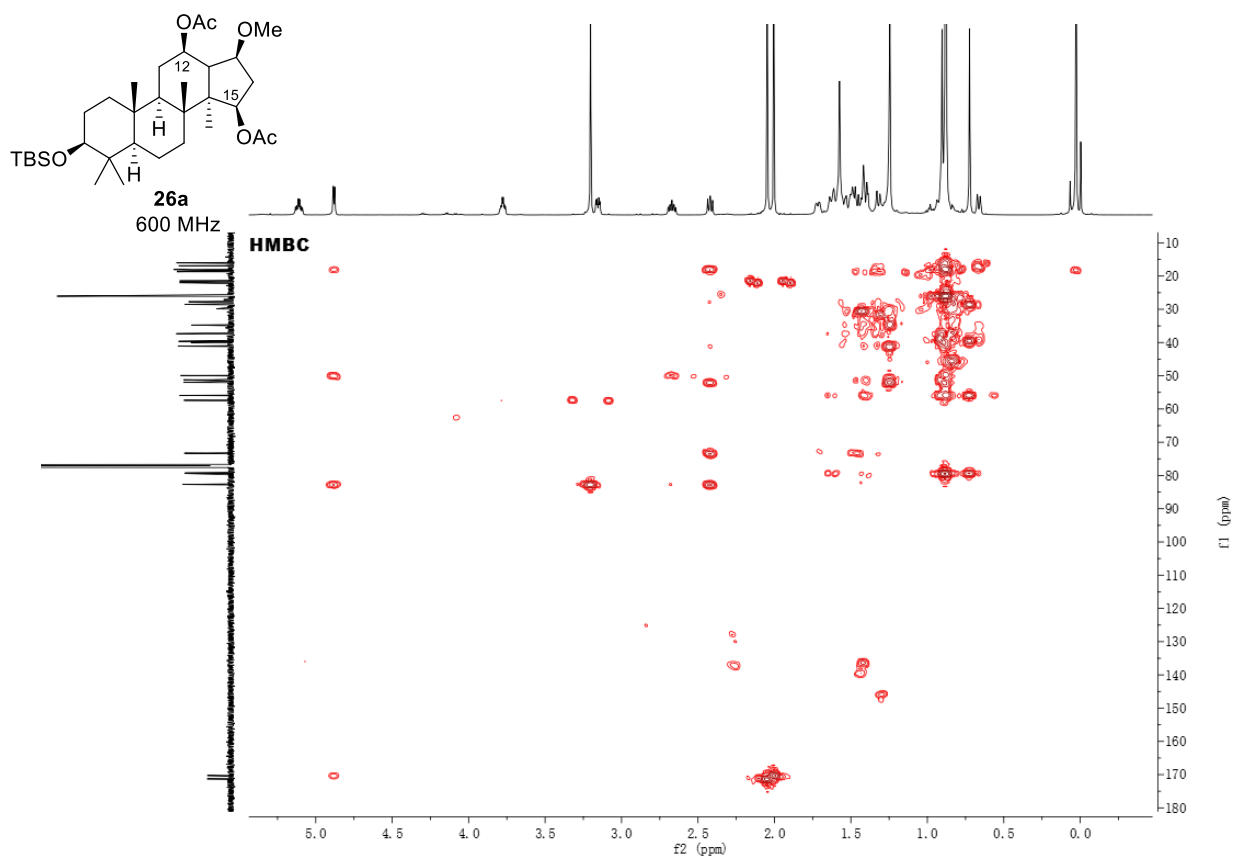

# Supporting Information

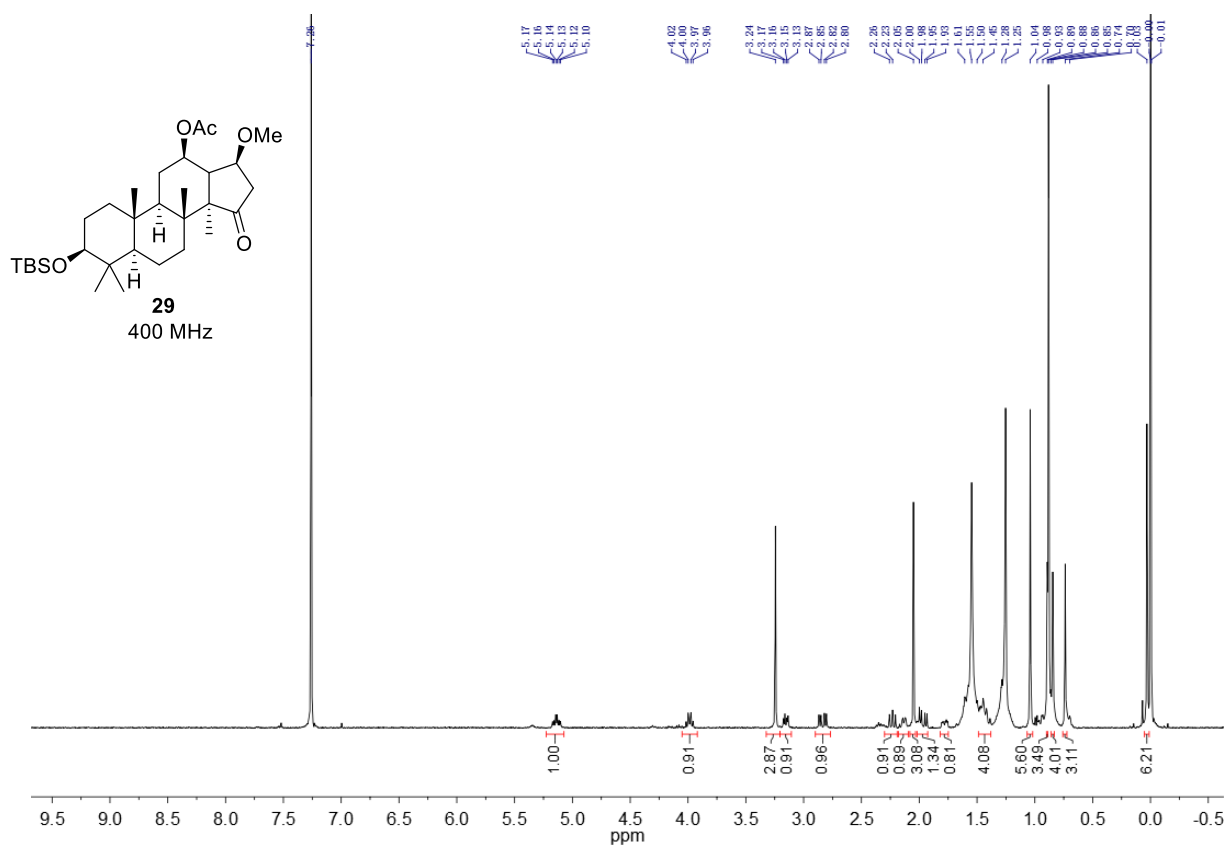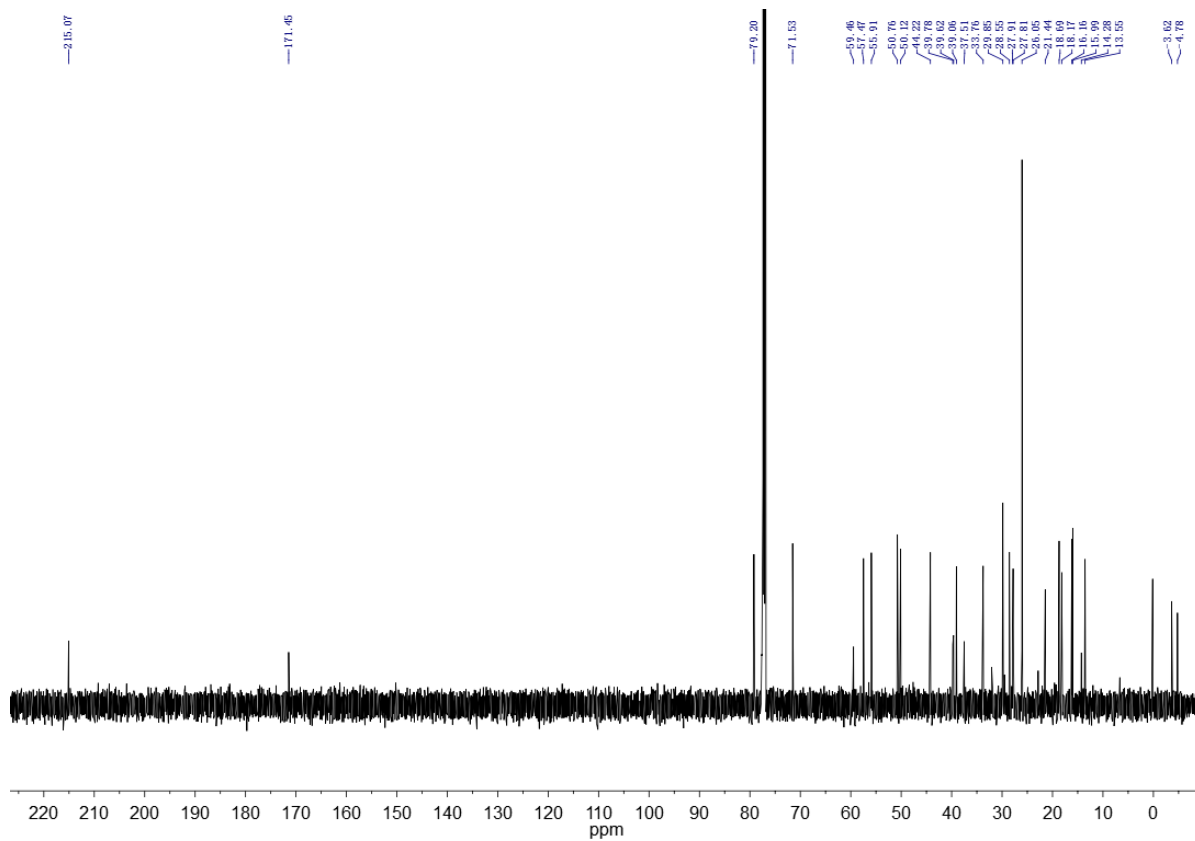

# Supporting Information

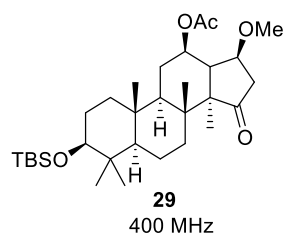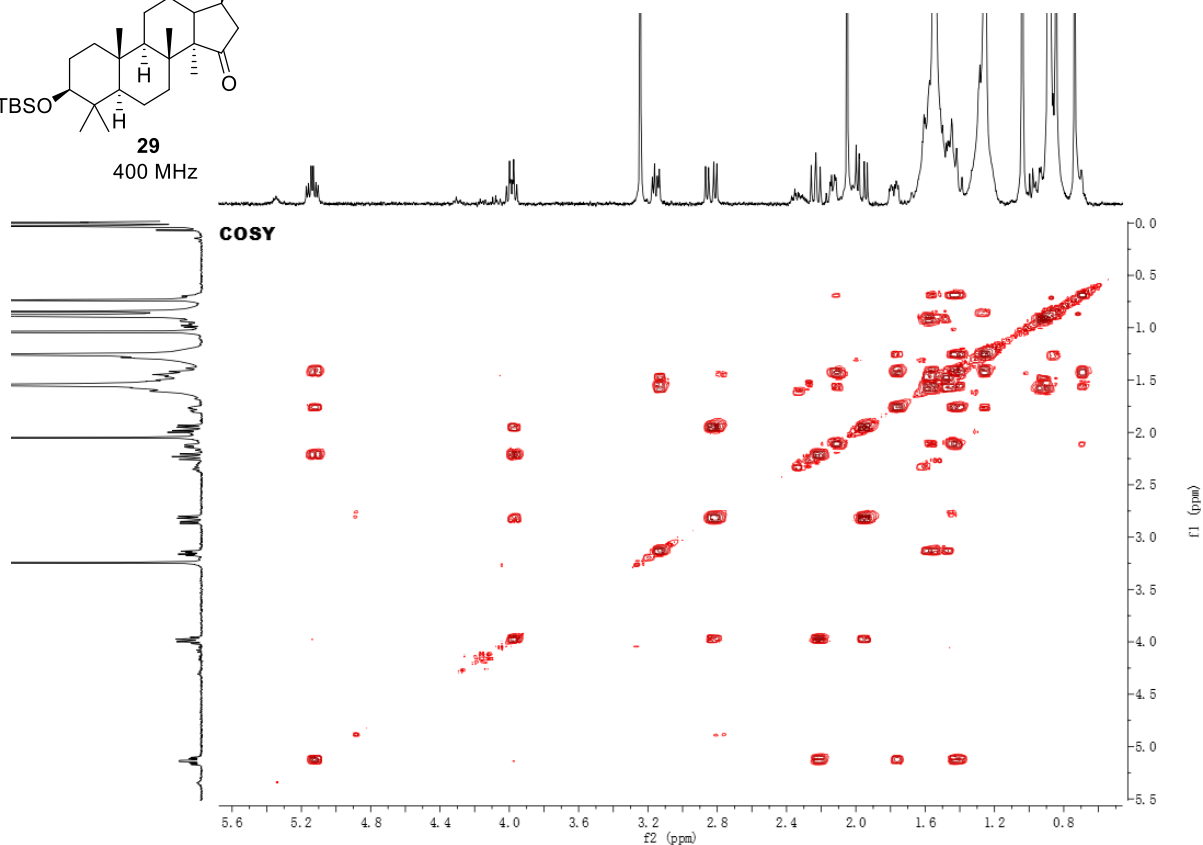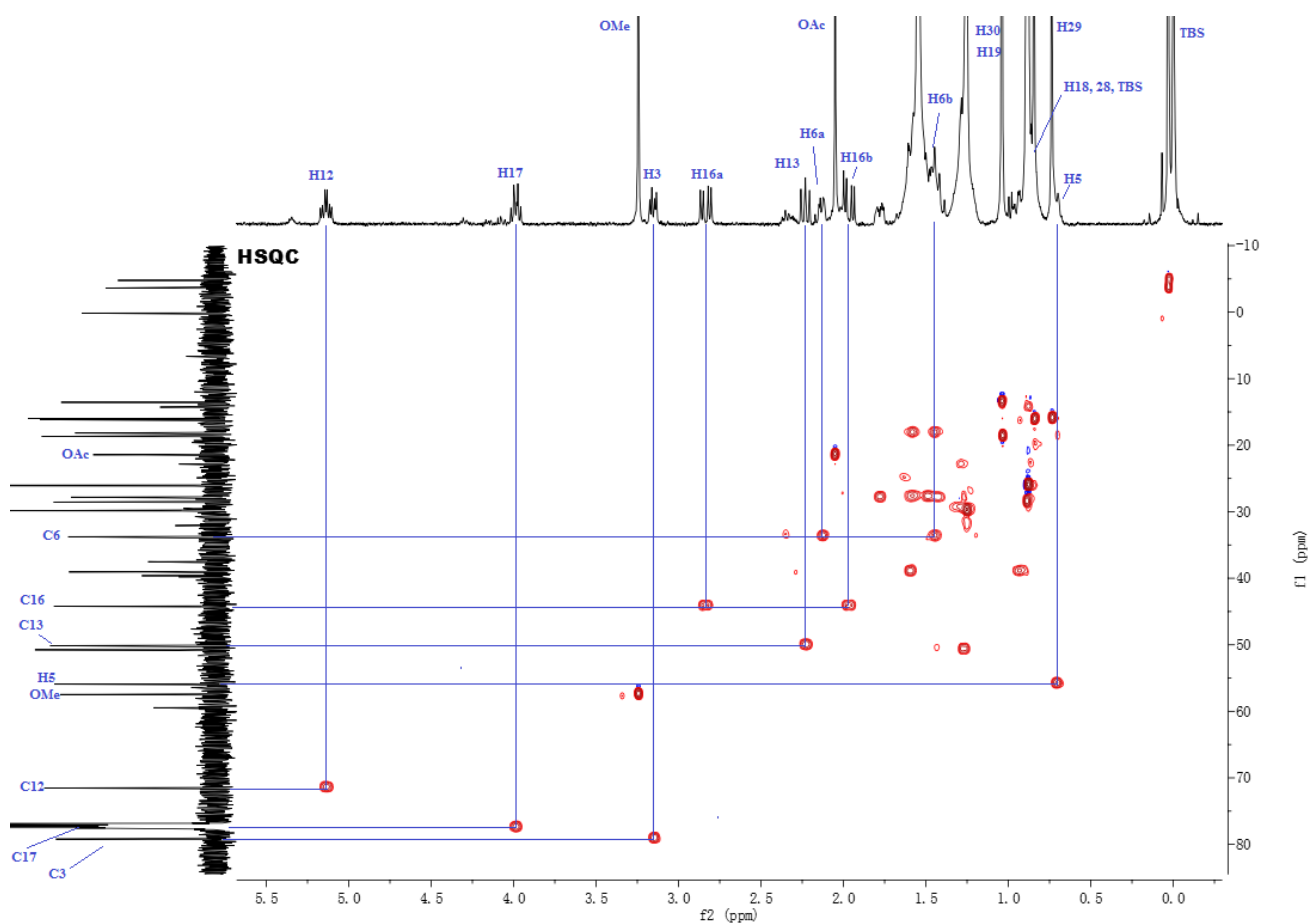

# Supporting Information

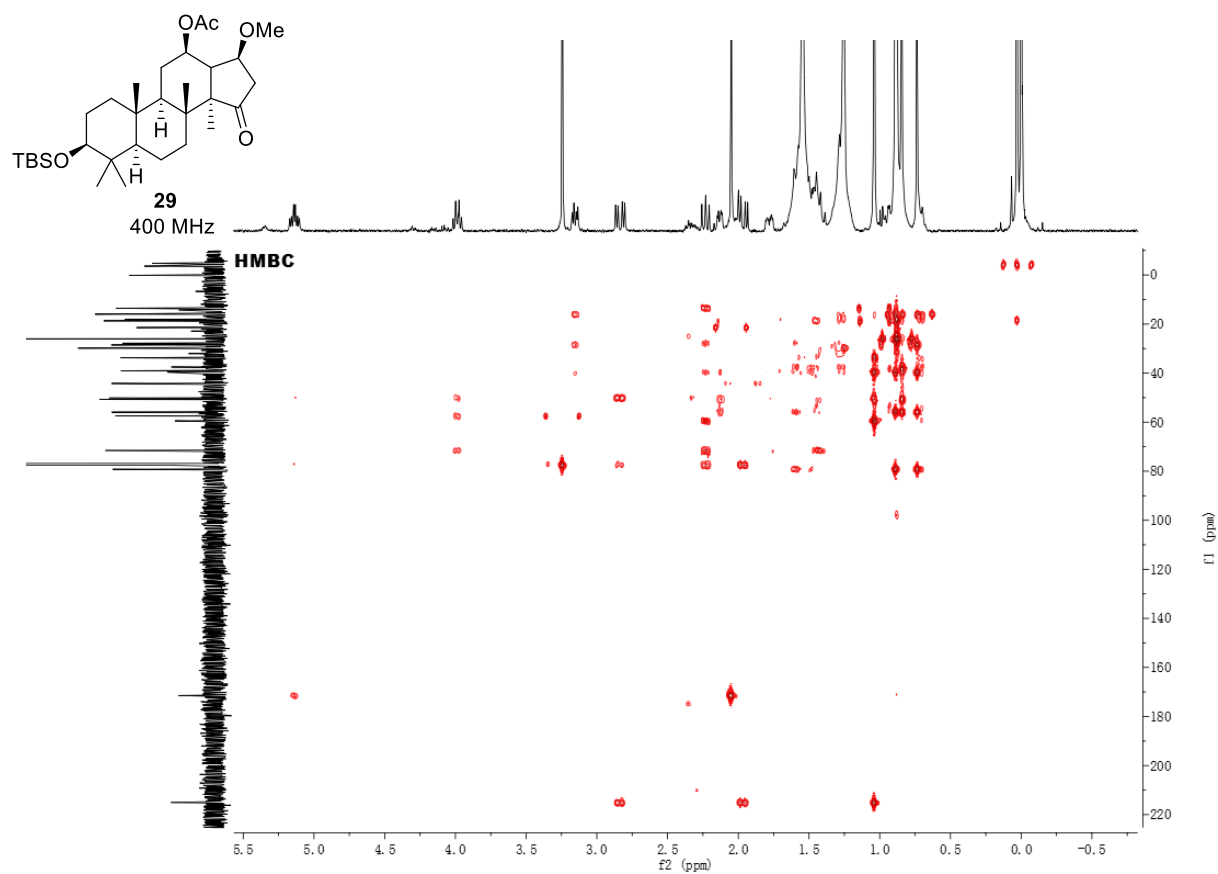



# Supporting Information

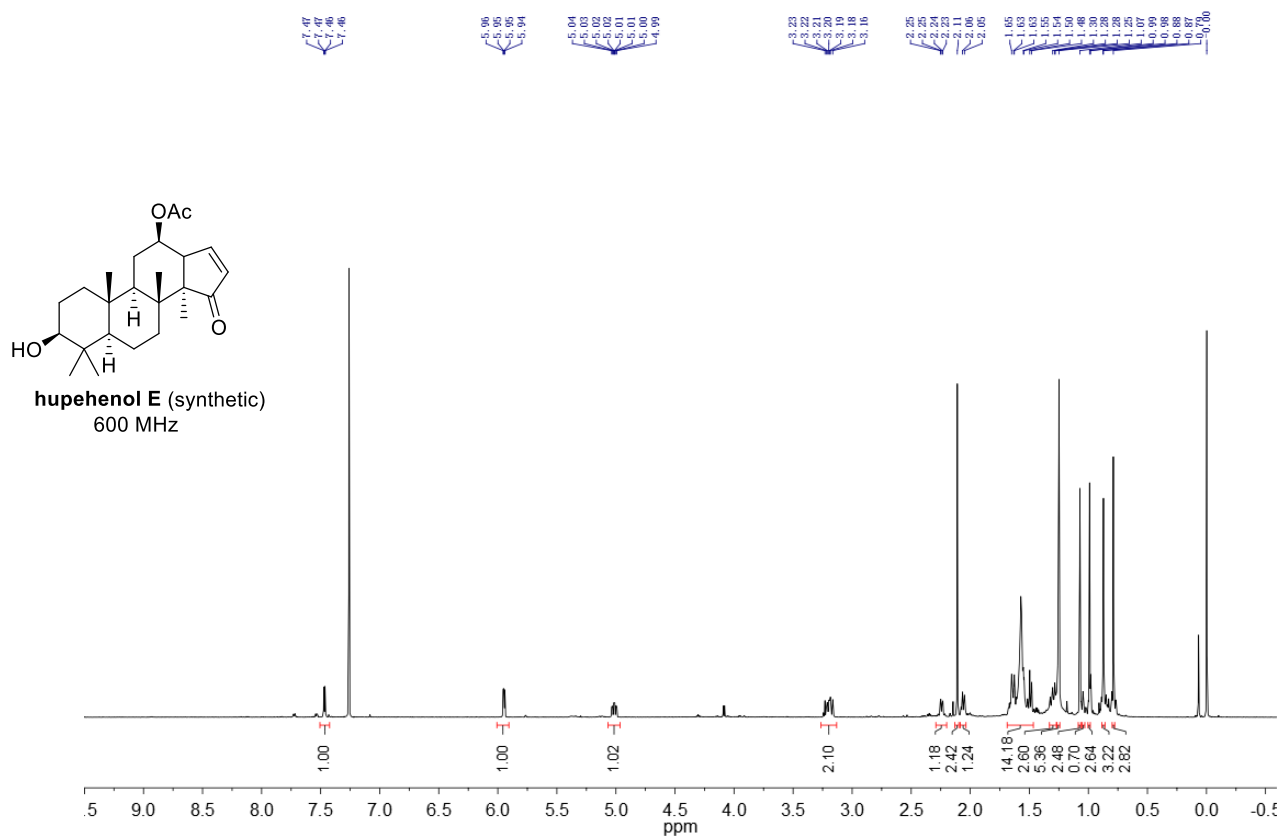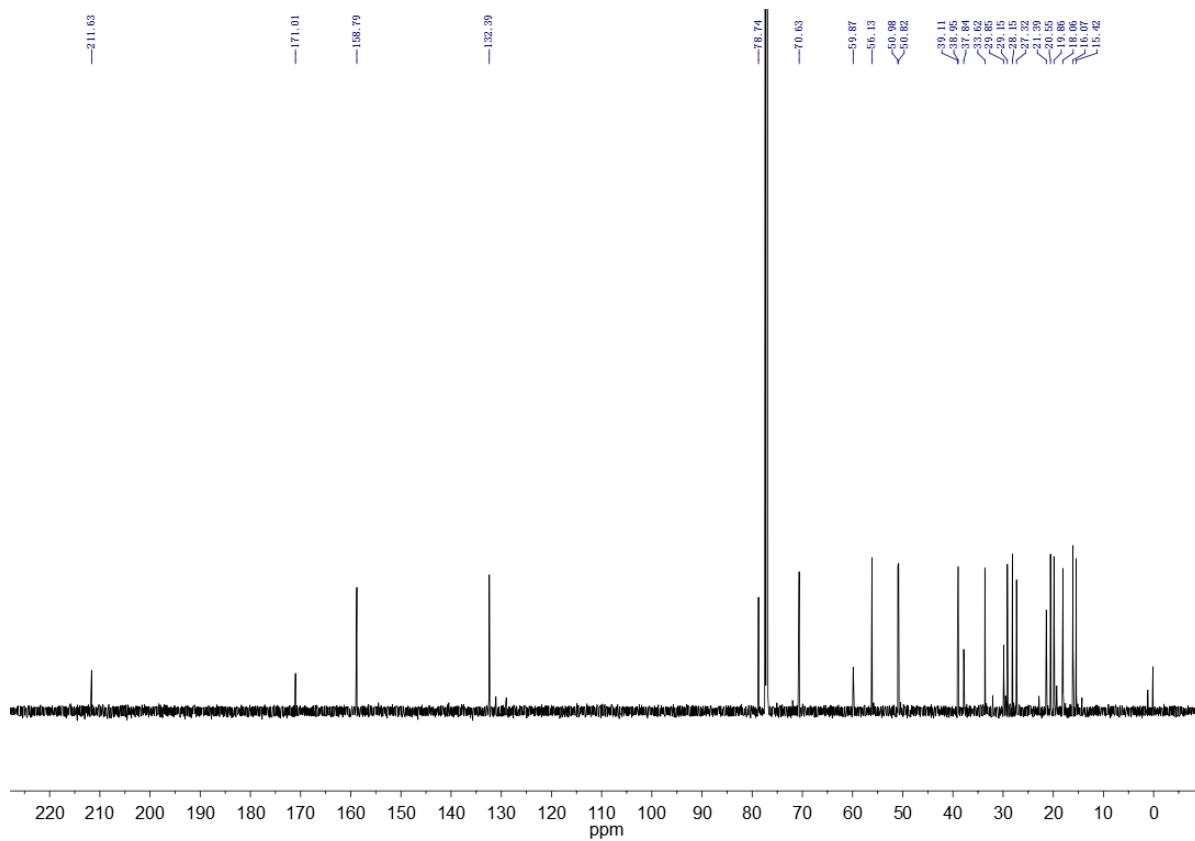

# Supporting Information

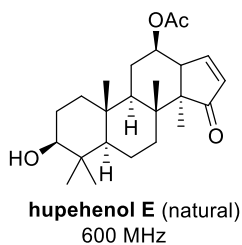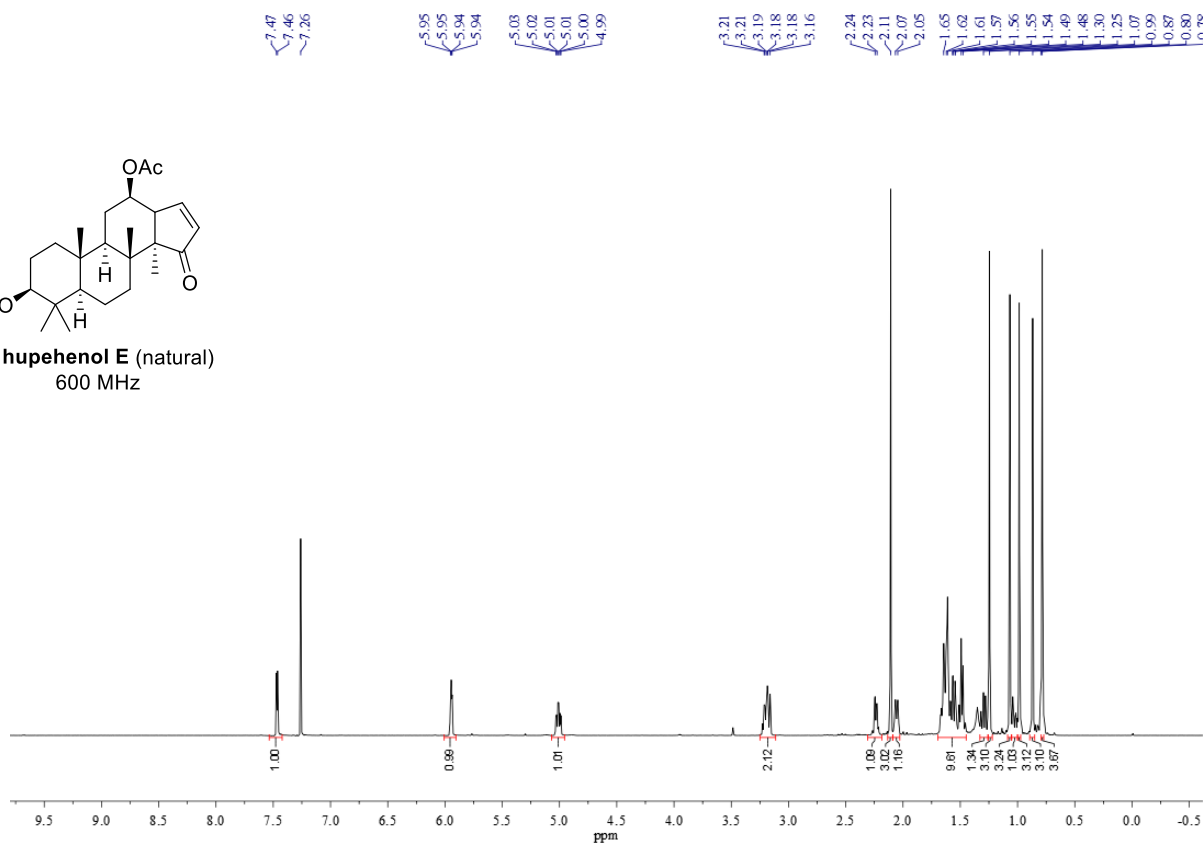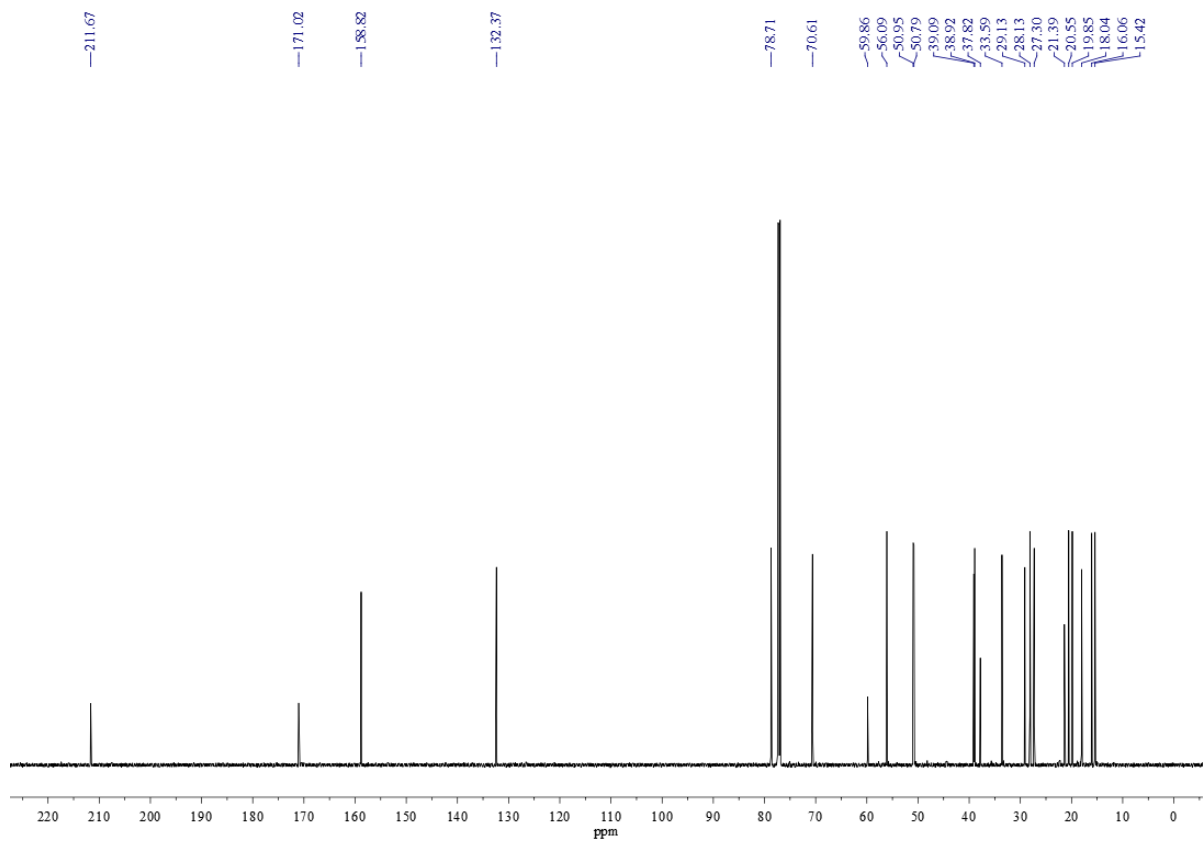

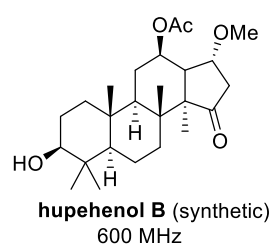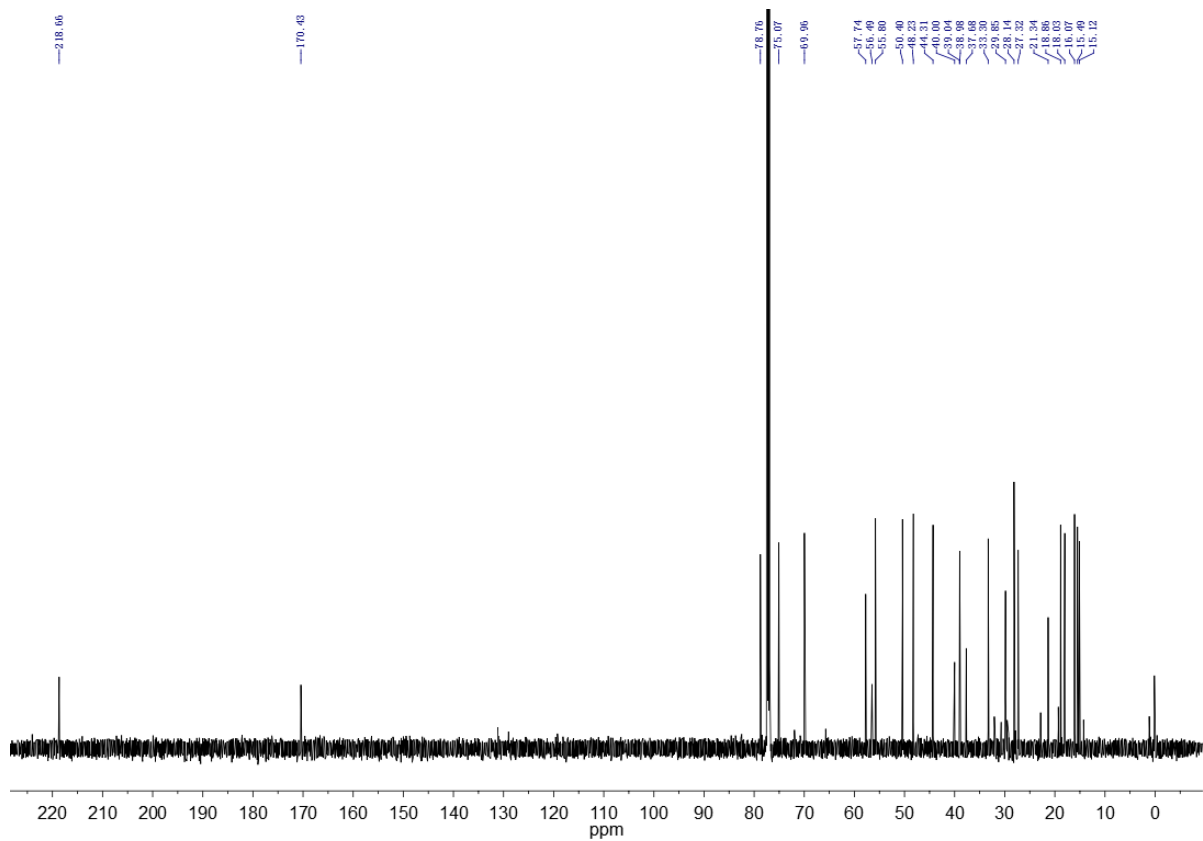

# Supporting Information

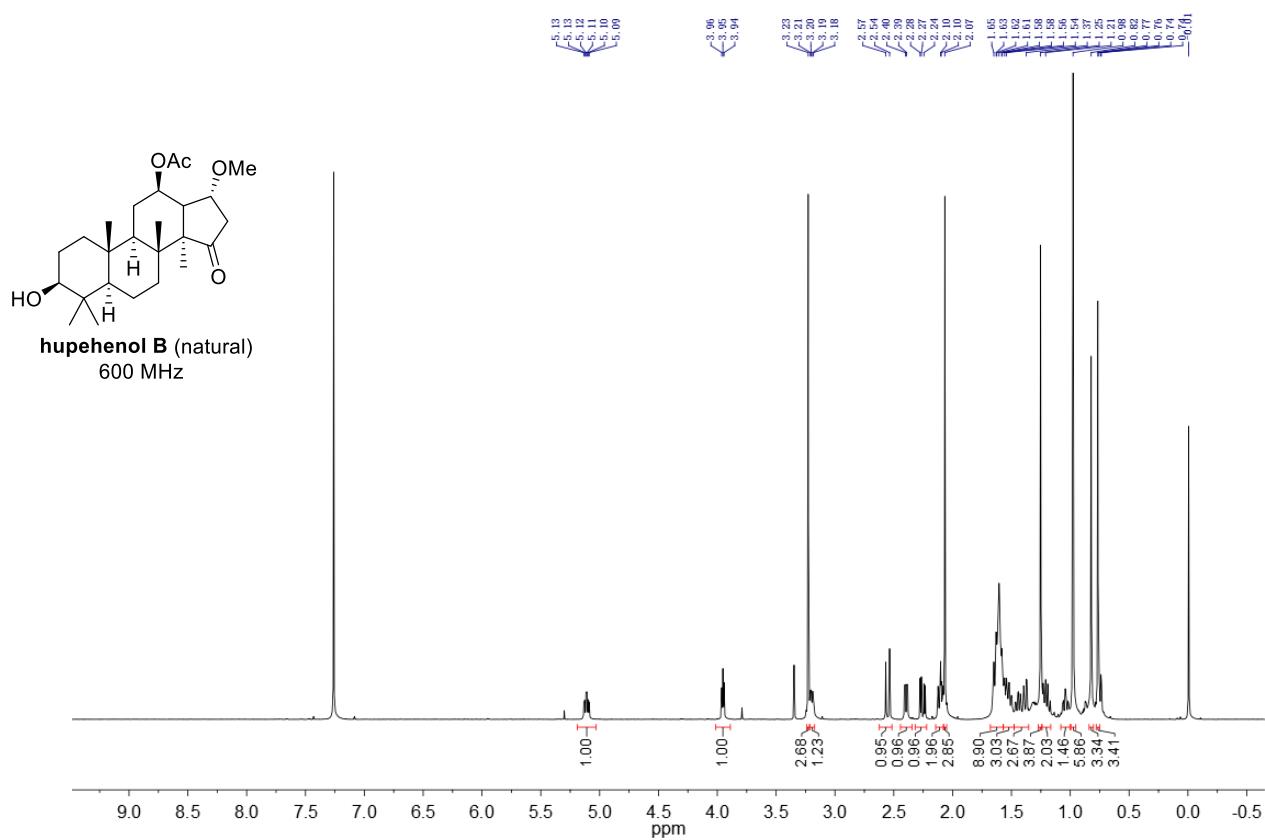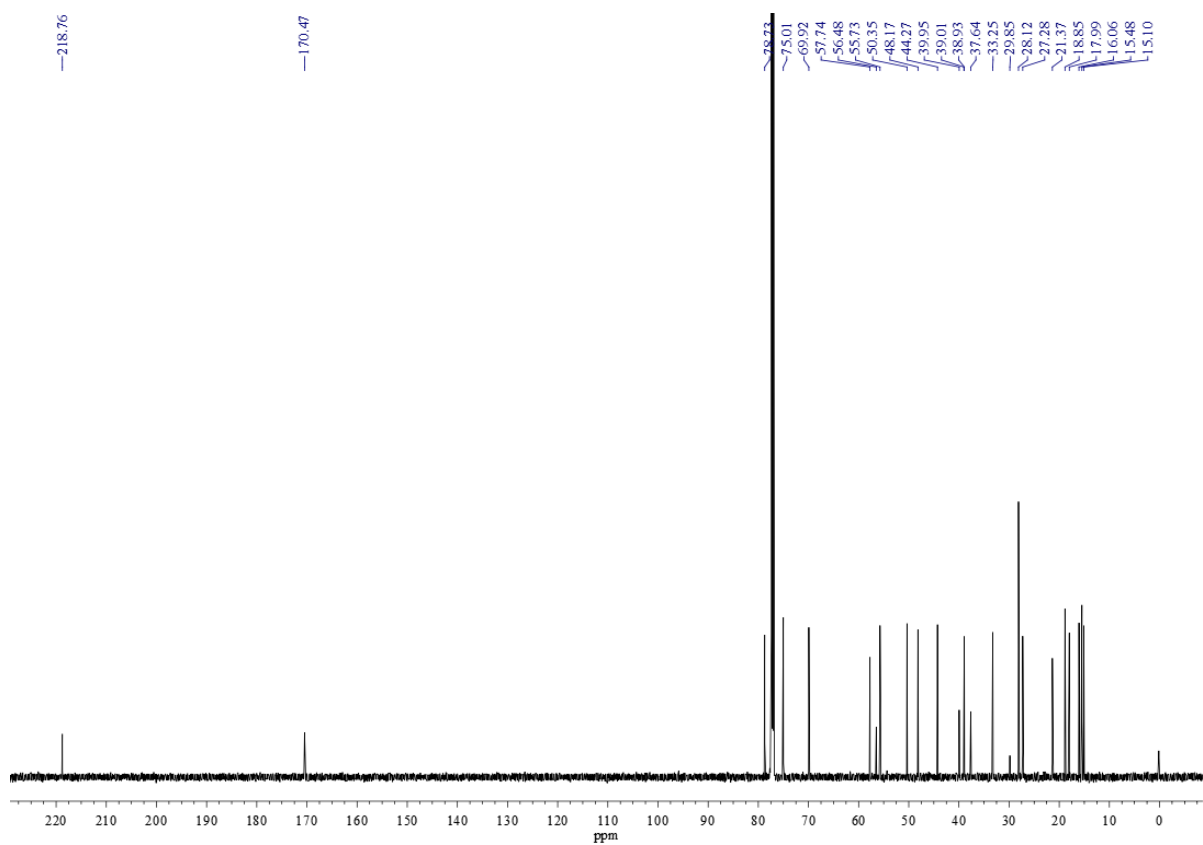

# Supporting Information

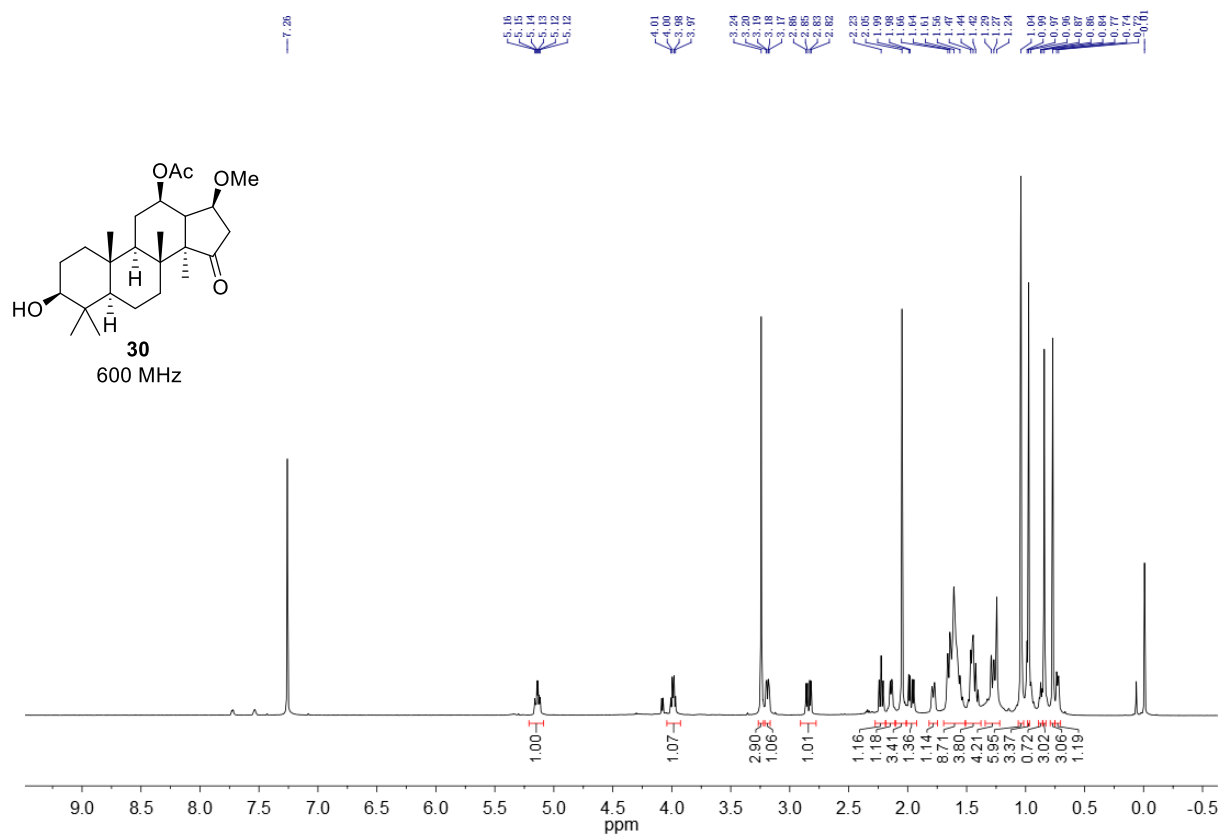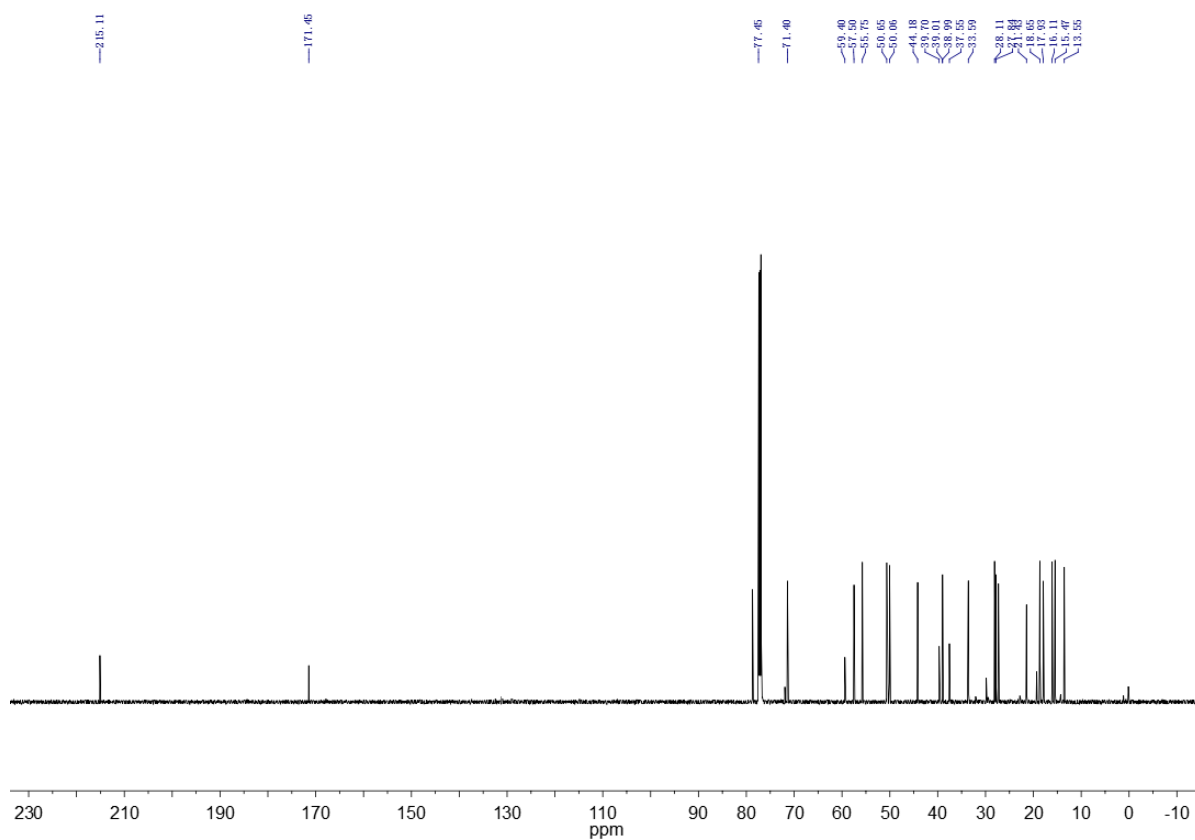

# Supporting Information

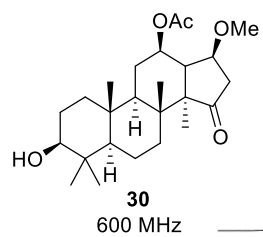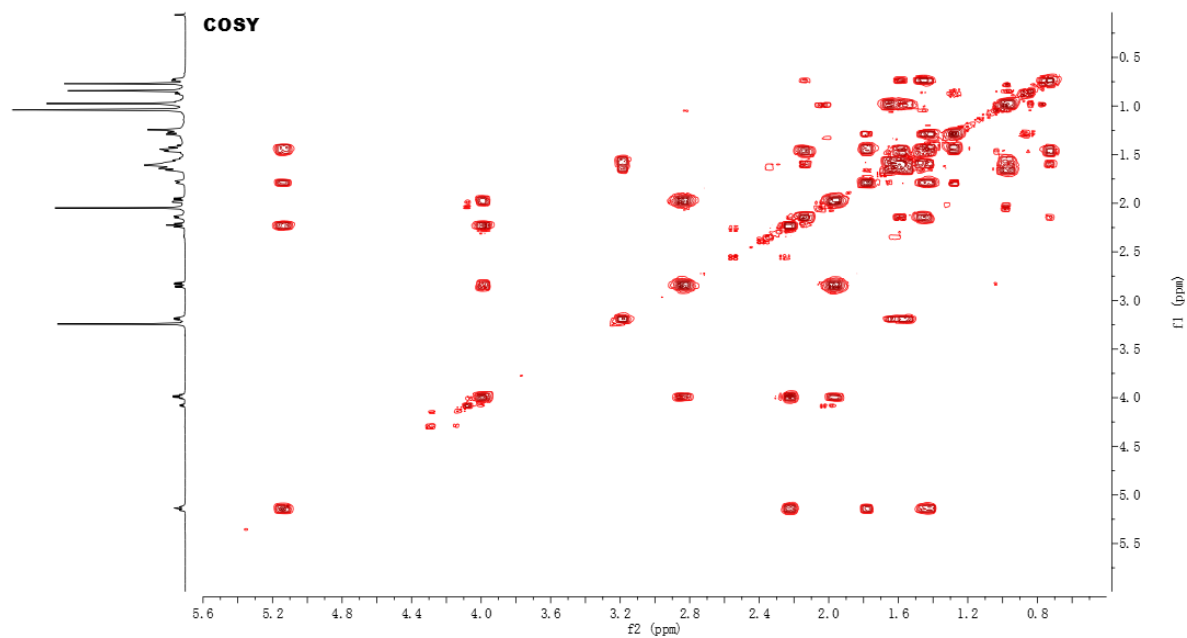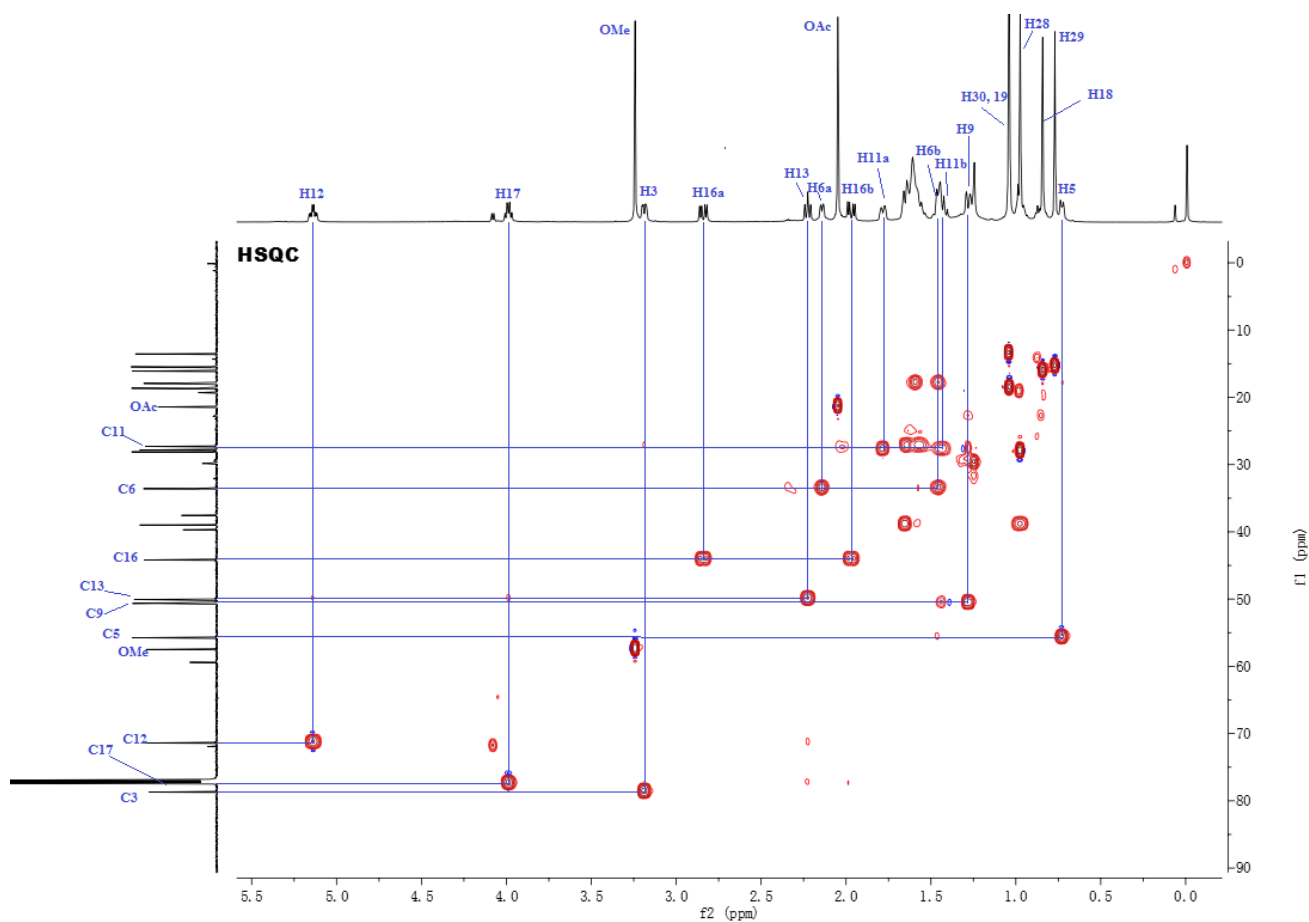

# Supporting Information

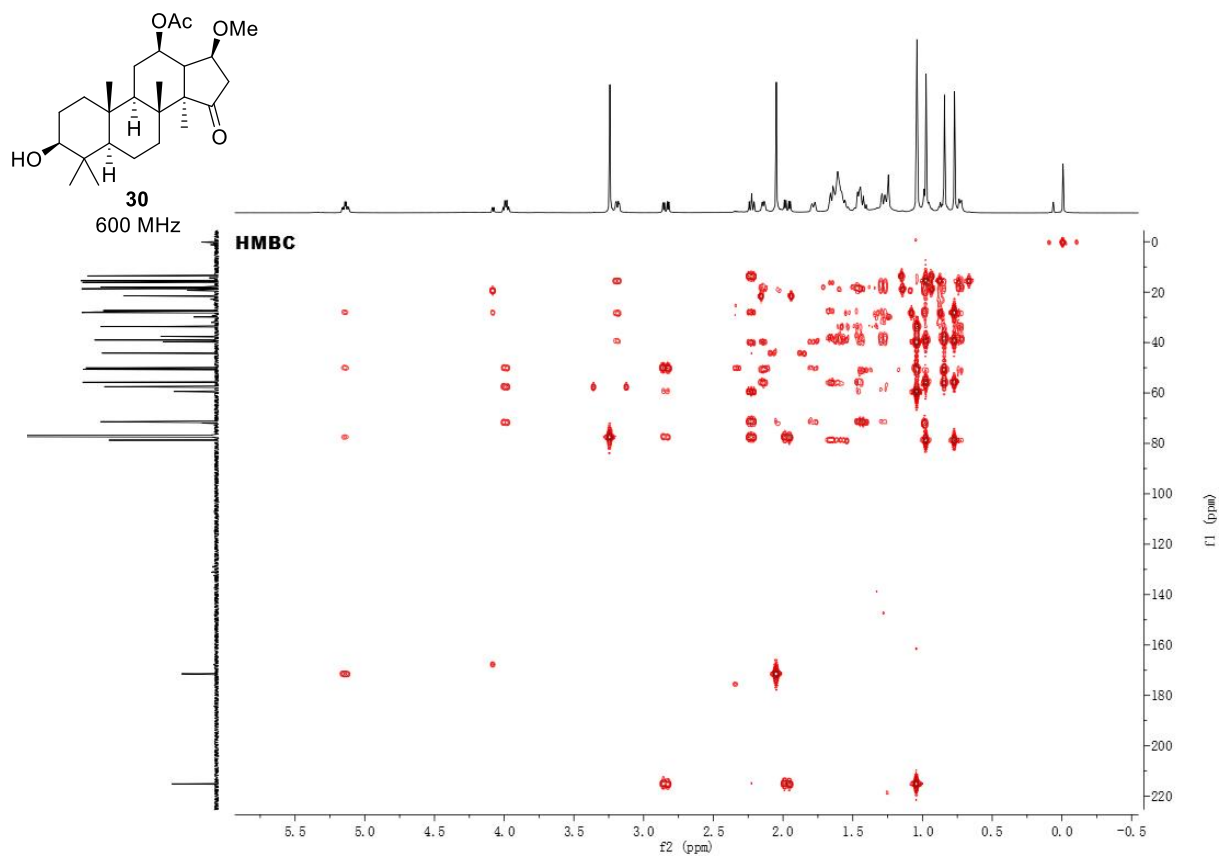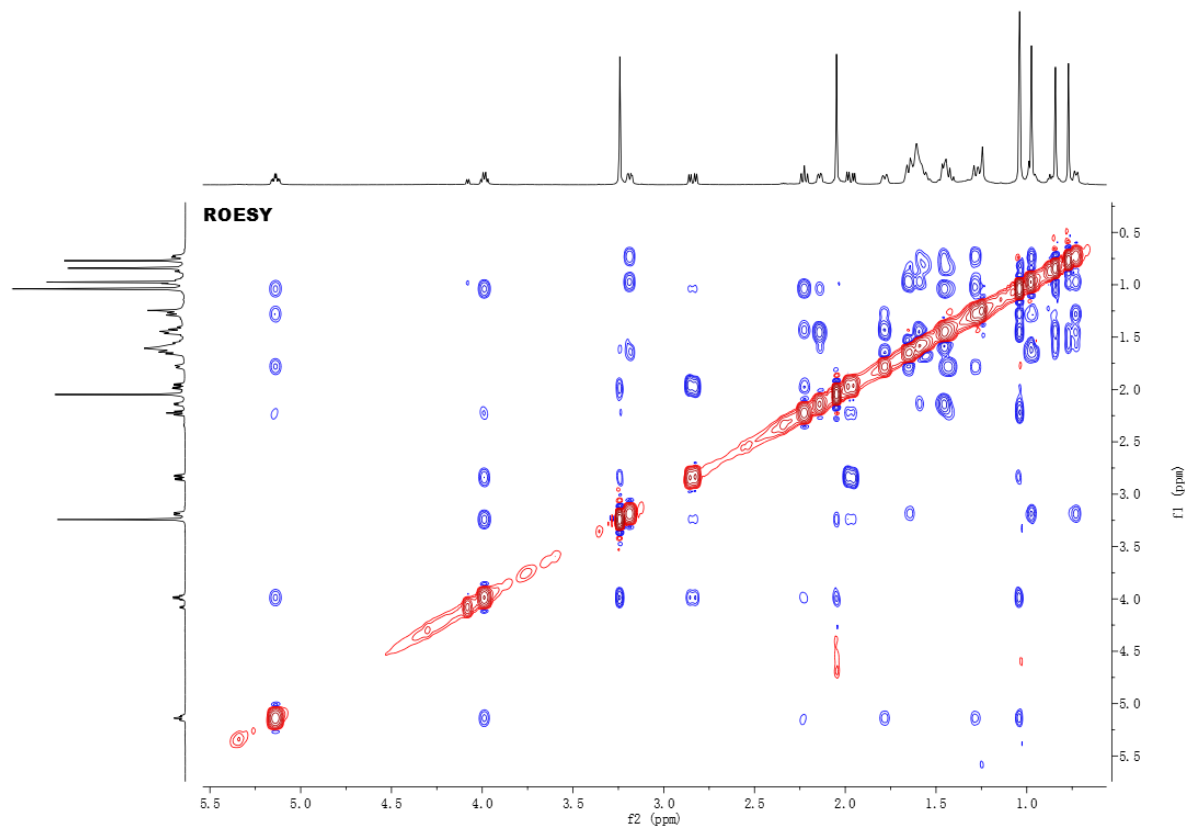

# Supporting Information

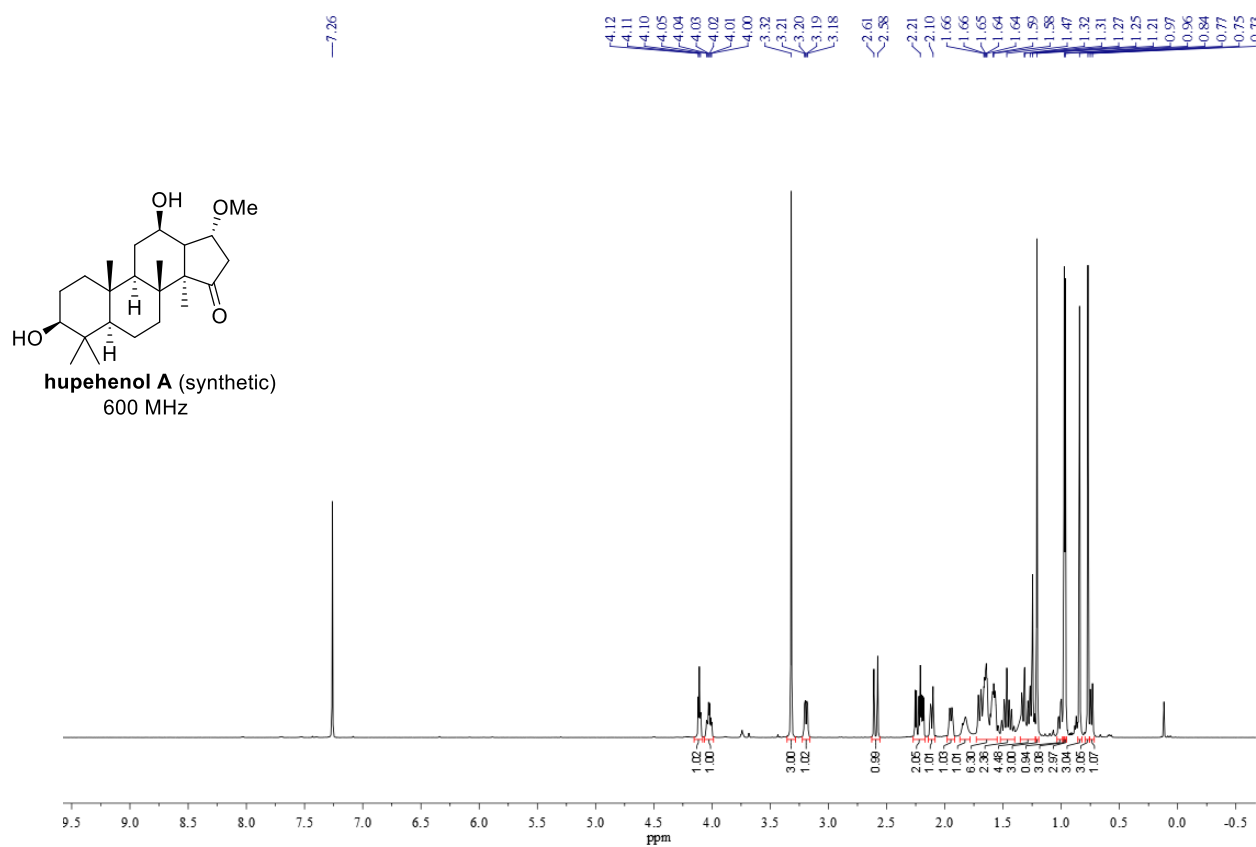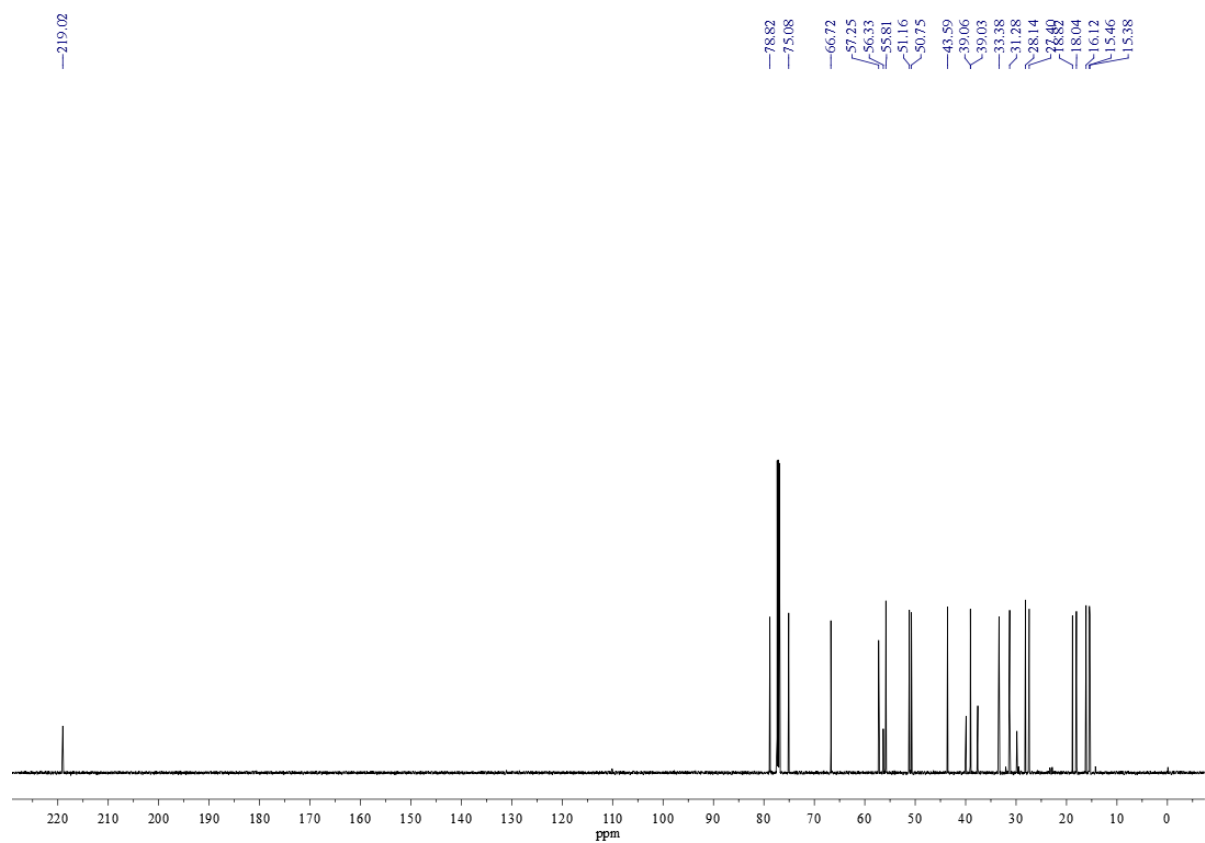



# Supporting Information

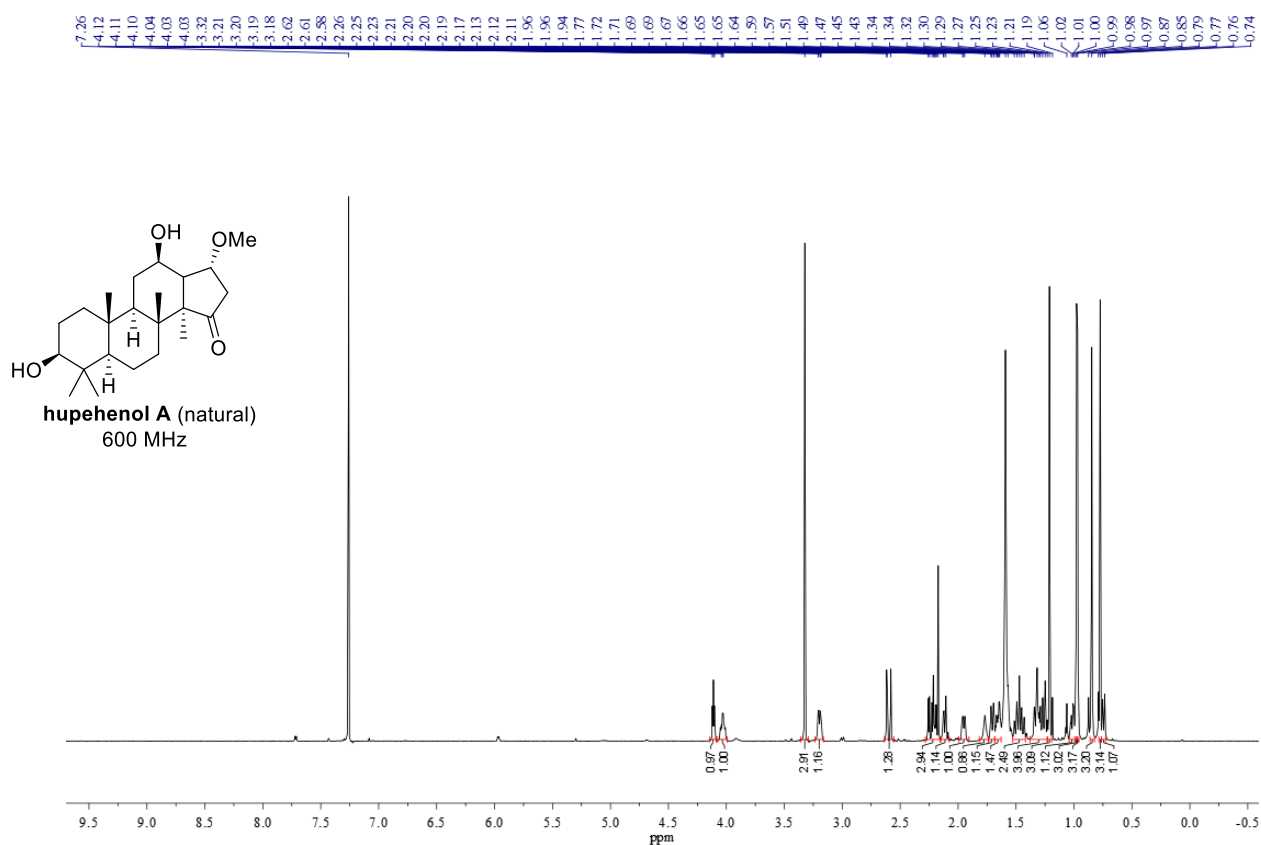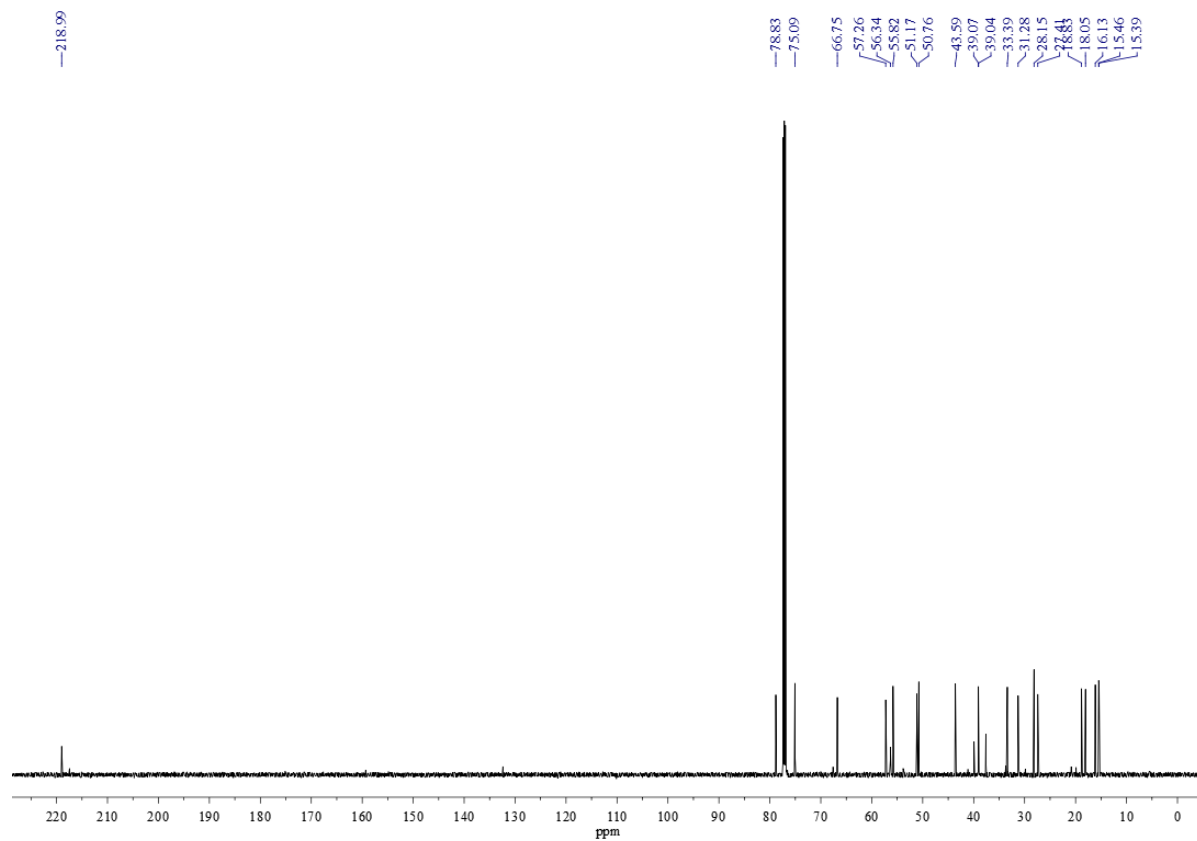

# Supporting Information

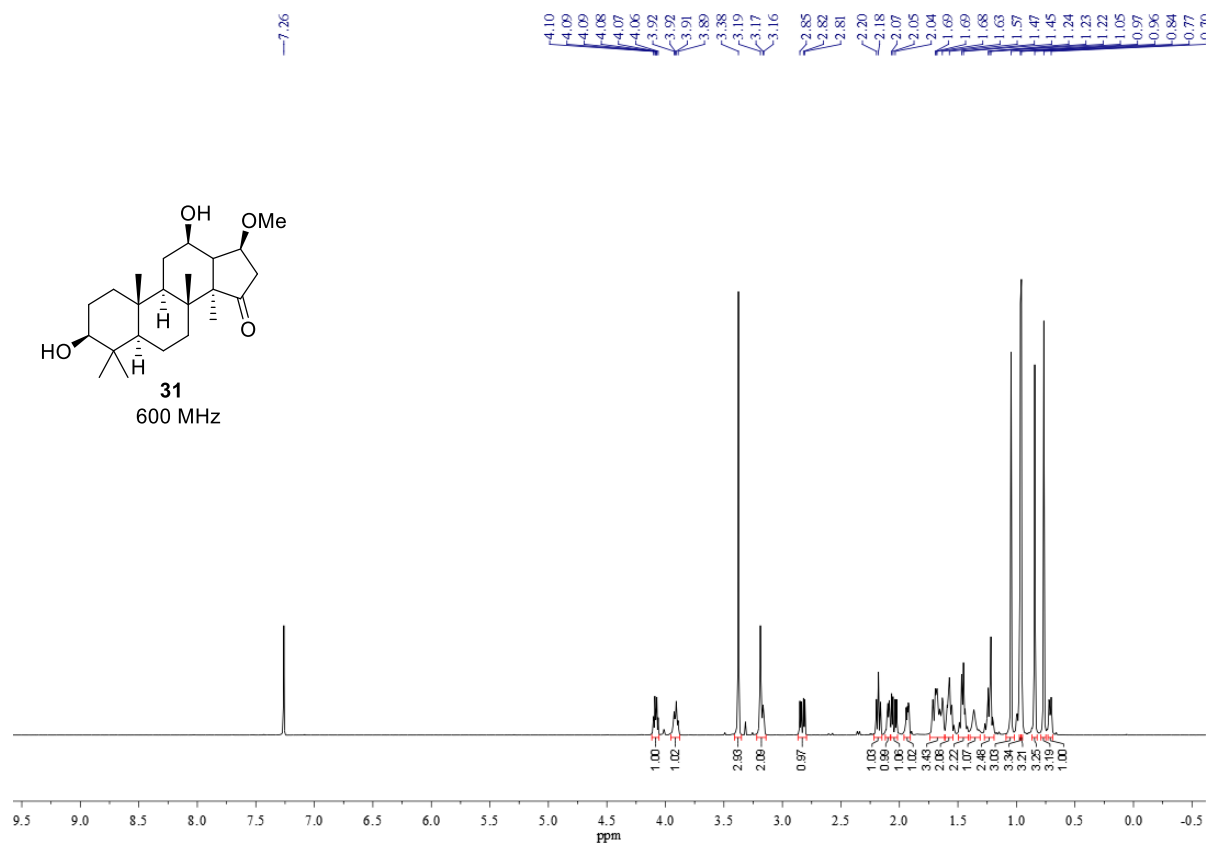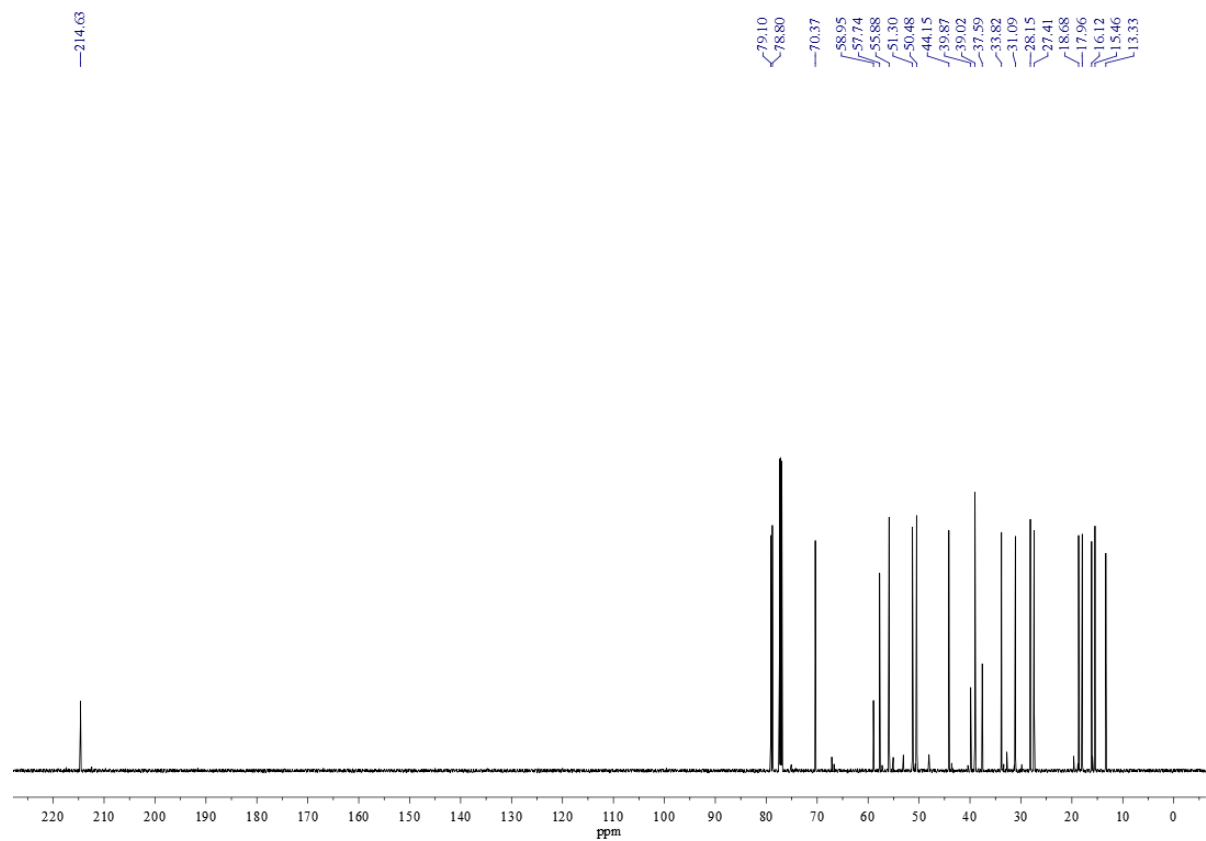

# Supporting Information

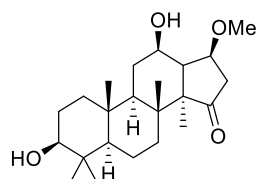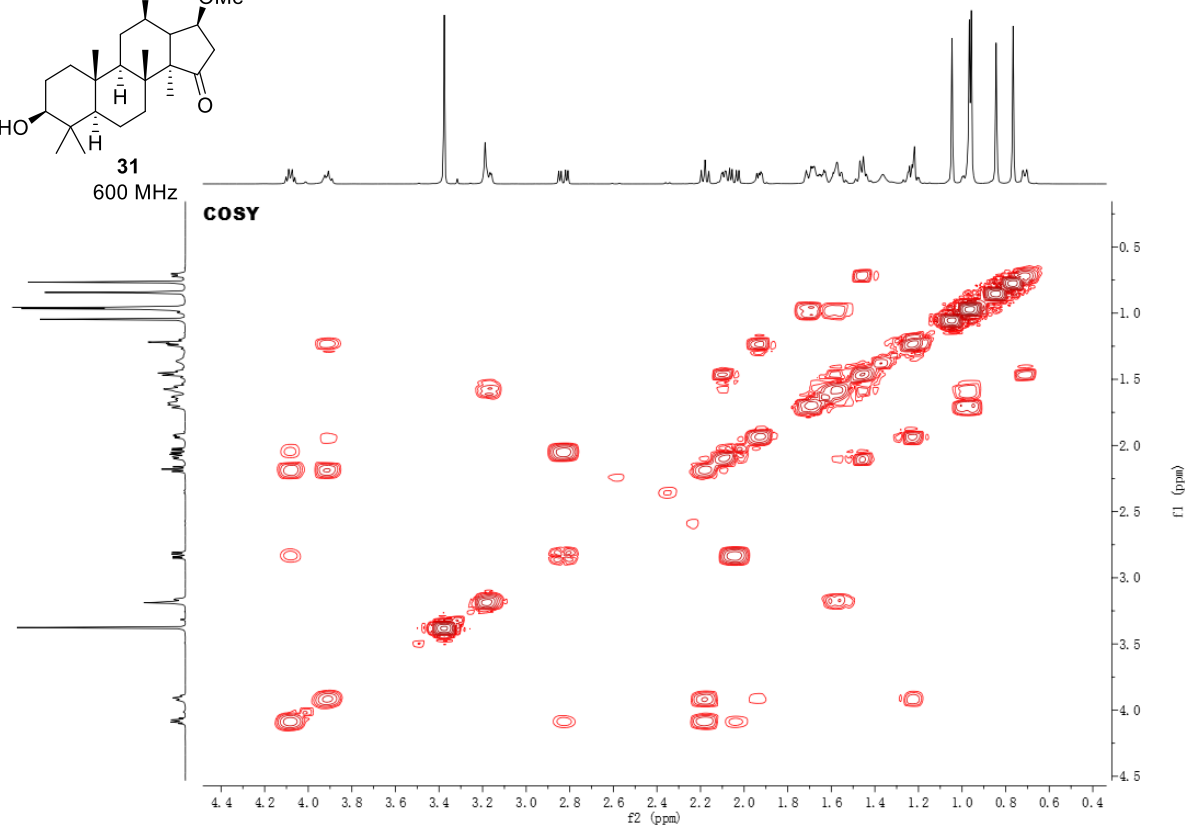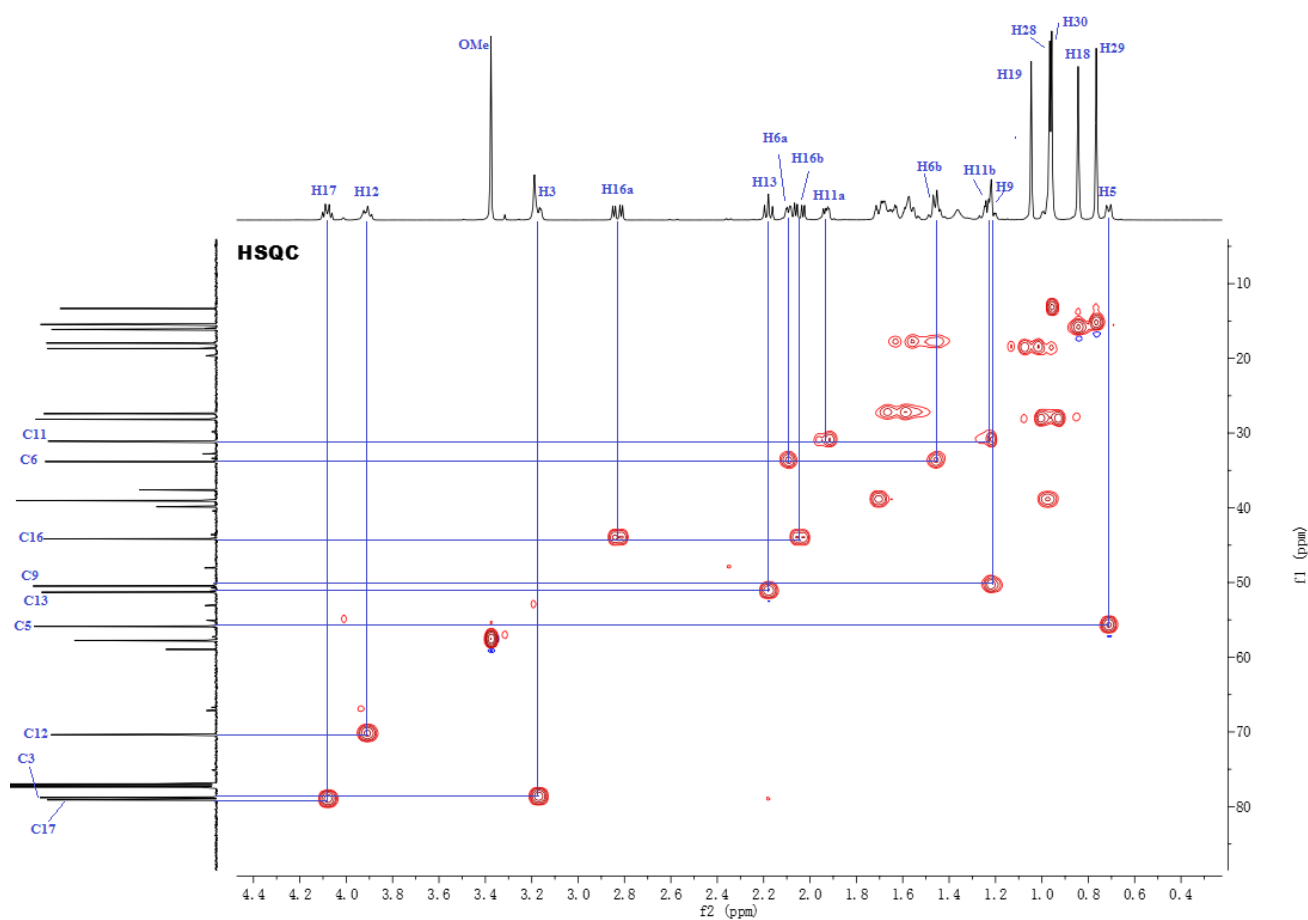

# Supporting Information

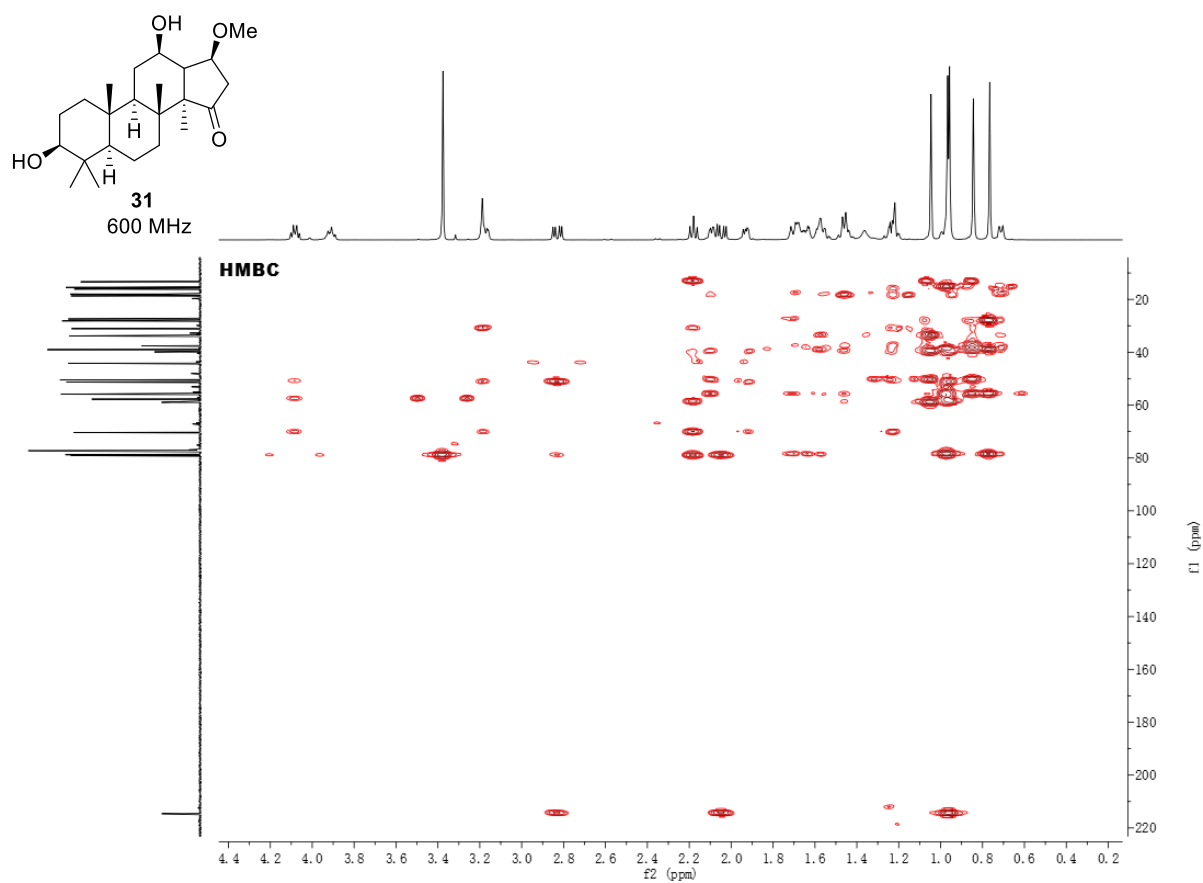

### Supporting Information

Crystal data for compound **17**:  $C_{34}H_{57}F_3O_6SSi$ ,  $M = 678.95$ , orthorhombic,  $a = 9.526(2) \text{ \AA}$ ,  $b = 15.182(3) \text{ \AA}$ ,  $c = 25.702(5) \text{ \AA}$ ,  $\alpha = 90.00^\circ$ ,  $\beta = 90.00^\circ$ ,  $\gamma = 90.00^\circ$ ,  $V = 3717.2(13) \text{ \AA}^3$ ,  $T = 100(2) \text{ K}$ , space group  $P212121$ ,  $Z = 4$ ,  $\mu(\text{MoK}\alpha) = 0.174 \text{ mm}^{-1}$ , 36539 reflections measured, 9281 independent reflections ( $R_{\text{int}} = 0.0567$ ). The final  $R_I$  values were 0.0449 ( $I > 2\sigma(I)$ ). The final  $wR(F^2)$  values were 0.1104 ( $I > 2\sigma(I)$ ). The final  $R_I$  values were 0.0546 (all data). The final  $wR(F^2)$  values were 0.1154 (all data). The goodness of fit on  $F^2$  was 1.050. Flack parameter =  $-0.02(6)$ . (CCDC 1405681)

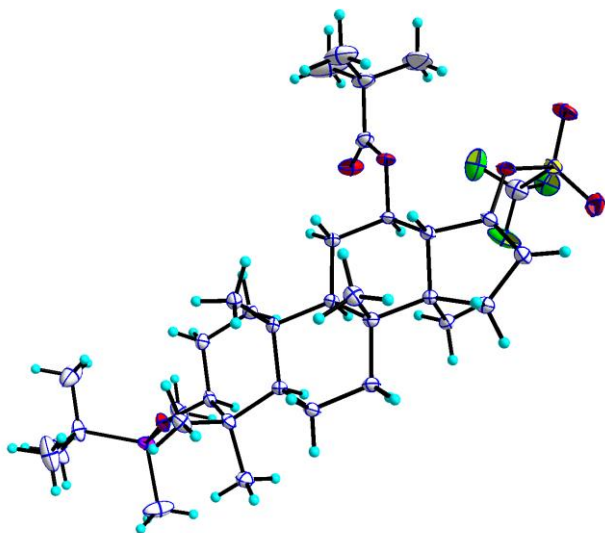

Displacement ellipsoids are drawn at the 50% probability level.

### Supporting Information

Crystal data for compound **26a**:  $C_{33}H_{58}O_6Si$ ,  $M = 578.88$ , monoclinic,  $a = 11.1824(8) \text{ \AA}$ ,  $b = 12.1736(10) \text{ \AA}$ ,  $c = 12.1396(9) \text{ \AA}$ ,  $\alpha = 90.00^\circ$ ,  $\beta = 100.485(3)^\circ$ ,  $\gamma = 90.00^\circ$ ,  $V = 1625.0(2) \text{ \AA}^3$ ,  $T = 100(2) \text{ K}$ , space group  $P21$ ,  $Z = 2$ ,  $\mu(\text{CuK}\alpha) = 0.960 \text{ mm}^{-1}$ , 12191 reflections measured, 4693 independent reflections ( $R_{int} = 0.0555$ ). The final  $R_I$  values were 0.0771 ( $I > 2\sigma(I)$ ). The final  $wR(F^2)$  values were 0.2346 ( $I > 2\sigma(I)$ ). The final  $R_I$  values were 0.0793 (all data). The final  $wR(F^2)$  values were 0.2370 (all data). The goodness of fit on  $F^2$  was 1.163. Flack parameter = 0.11(6). The Hooft parameter is 0.127(18) for 1812 Bijvoet pairs. (CCDC 1405682)

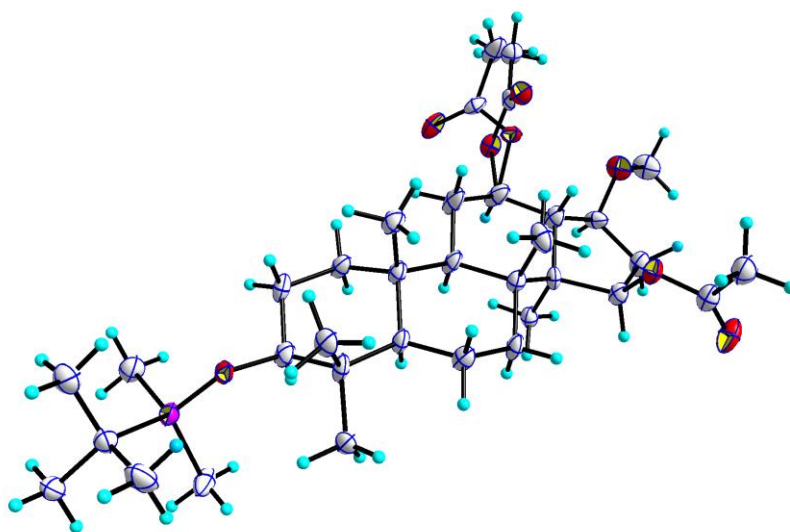

Displacement ellipsoids are drawn at the 50% probability level.

### Supporting Information

Crystal data for compound **4**:  $C_{25}H_{40}O_5$ ,  $M = 420.57$ , orthorhombic,  $a = 7.3472(5)$  Å,  $b = 11.4681(8)$  Å,  $c = 26.6223(19)$  Å,  $\alpha = 90.00^\circ$ ,  $\beta = 90.00^\circ$ ,  $\gamma = 90.00^\circ$ ,  $V = 2243.2(3)$  Å<sup>3</sup>,  $T = 100(2)$  K, space group  $P212121$ ,  $Z = 4$ ,  $\mu(\text{CuK}\alpha) = 0.676$  mm<sup>-1</sup>, 11376 reflections measured, 3830 independent reflections ( $R_{\text{int}} = 0.0912$ ). The final  $R_I$  values were 0.1555 ( $I > 2\sigma(I)$ ). The final  $wR(F^2)$  values were 0.3719 ( $I > 2\sigma(I)$ ). The final  $R_I$  values were 0.2829 (all data). The final  $wR(F^2)$  values were 0.4569 (all data). The goodness of fit on  $F^2$  was 1.582. Flack parameter = 0.3(9). (**CCDC 1405683**)

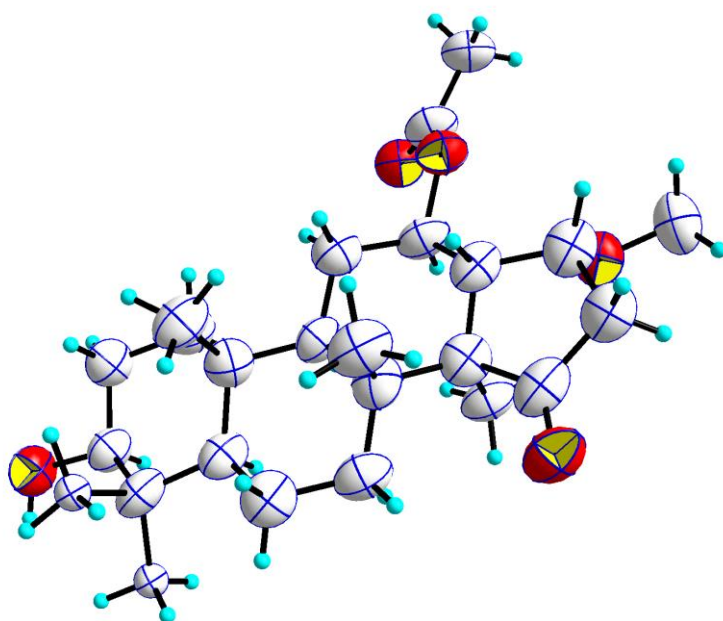

Displacement ellipsoids are drawn at the 50% probability level.
